# Supplementary material for: Single‐Cell Mass Spectrometry for Discovery Proteomics: Quantifying Translational Cell Heterogeneity in the 16‐Cell Frog (Xenopus) Embryo
Source: PubMed Central journal article supplement — Angew Chem Int Ed Engl. 2016 Jan 12;55(7):2454–8. doi: 10.1002/anie.201510411 (PMC4755155; doi:10.1002/anie.201510411), 2016-01-12
Supplement: ANIE-55-2454-s001.pdf [file ANIE-55-2454-s001.pdf]

Supporting Information

**Single-Cell Mass Spectrometry for Discovery Proteomics: Quantifying  
Translational Cell Heterogeneity in the 16-Cell Frog (*Xenopus*)  
Embryo**

*Camille Lombard-Banek, Sally A. Moody, and Peter Nemes\**

anie\_201510411\_sm\_miscellaneous\_information.pdf

## Table of Contents

|                                                                              |    |
|------------------------------------------------------------------------------|----|
| MATERIALS AND METHODS .....                                                  | 2  |
| Materials and Reagents .....                                                 | 2  |
| Solutions .....                                                              | 2  |
| Animals and Cell Isolation.....                                              | 2  |
| Total Protein Assay .....                                                    | 2  |
| Sample Preparation for Bottom-Up Proteomic MS.....                           | 2  |
| Single-cell CE- $\mu$ ESI-HRMS using a Time-of-Flight Mass Spectrometer..... | 3  |
| CE- $\mu$ ESI with an Orbitrap-q-Ion Trap Mass Spectrometer.....             | 4  |
| NanoLC-nanoESI-HRMS.....                                                     | 5  |
| Data Analysis.....                                                           | 5  |
| REFERENCES .....                                                             | 6  |
| SUPPLEMENTARY FIGURES .....                                                  | 6  |
| Figure S1.....                                                               | 6  |
| Figure S2.....                                                               | 6  |
| Figure S3.....                                                               | 7  |
| Figure S4.....                                                               | 7  |
| SUPPLEMENTARY TABLES .....                                                   | 8  |
| Table S1.....                                                                | 8  |
| Table S2.....                                                                | 9  |
| Table S3 .....                                                               | 10 |
| Table S4 .....                                                               | 30 |
| Table S5 .....                                                               | 31 |
| Table S6 .....                                                               | 33 |

## MATERIALS AND METHODS

**Materials and Reagents.** Solvents and chemicals were purchased from Fisher Scientific (Pittsburg, PA) in reagent grade or higher. For MS measurements, solutions and samples were prepared using MS-grade solvents. A standard peptide mix containing angiotensin II, leucine enkephalin, and Val-Tyr-Val was from Sigma Aldrich (St. Louis, MO). Bare (uncoated) fused silica capillaries (110/40  $\mu\text{m}$  outer/inner diameter) were from Polymicro Technologies (Phoenix, AZ).

**Solutions.** For Steinberg's solution, the following salts were dissolved at the specified concentration using Milli-Q purified water (Millipore): sodium chloride (58.2 mM), potassium chloride (0.67 mM), calcium nitrate (0.34 mM), magnesium sulfate (0.83 mM), Trisma hydrochloride (4.19 mM), and Trisma base (0.66 mM). The pH of the solution was titrated to 7.4 using 5 M sodium hydroxide. To obtain 50% Steinberg's solution, this solution was diluted two-fold.

**Animals and Cell Isolation.** Male and female *Xenopus laevis* adult frogs were purchased from Nasco (Fort Atkinson, WI) and maintained in a breeding colony at GW. All protocols related to the handling and manipulation of animals were approved by the GW Institutional Animal Care and Use Committee (IACUC #A311). Fertilized embryos were obtained via natural mating of adult frogs induced by gonadotropin as described previously.<sup>[2]</sup> Jelly coats surrounding the eggs were removed using cysteine solution following a standard protocol.<sup>[3]</sup> Two- to four-cell embryos with a distinct dorsal-ventral pigmentation difference were transferred into a Petri dish filled with 100% Steinberg's solution at room temperature and their development was monitored under a stereomicroscope. Embryos at the 16-cell stage (~2.75 h post fertilization) were transferred using a Pasteur pipette into 50% Steinberg's solution in a Petri dish coated with 2% agarose.

Single D11, V11, and V21 blastomeres were identified based on pigmentation and location in the embryo in reference to established fate maps.<sup>[4]</sup> Using sharpened forceps, the vitelline membrane was carefully removed from the embryos and single blastomeres were dissected following a protocol described elsewhere.<sup>[5]</sup> For each experimental condition,  $n = 3$  biological replicates were obtained in separate 0.6 mL centrifuge tubes.

**Total Protein Assay.** The total protein amount was determined for the 8-, 16-, 32-, and 64-cell whole embryos using the bicinchoninic acid (BCA) assay according to the instructions of the manufacturer (Pierce Biotechnology, Inc.; Rockford, IL). For each developmental stage,  $n = 3$  biological replicates (different embryos) were measured in 3 technical replicates (same sample quantified multiple times), allowing us to extrapolate the average cell's protein content by taking into account the total cell number in the embryo. Measurement results are shown in Figure S1. The average blastomere in the 16-cell embryo contained ~10  $\mu\text{g}$  of total protein.

**Sample Preparation for Bottom-Up Proteomic MS.** Whole embryos and single isolated blastomeres were lysed in 50  $\mu\text{L}$  and 10  $\mu\text{L}$ , respectively, of a buffer containing 20 mM Tris-HCl at pH 7.5, 0.15 M NaCl, 5 mM EDTA, and 1% of sodium dodecyl sulfate (SDS) or digitonin as the detergent. To facilitate lysis, the samples were agitated on ice for 5 min in an ultrasonic bath. Afterward, proteins were reduced by dithiothreitol and alkylated using iodoacetamide. Proteins were precipitated in acetone chilled to  $-20^{\circ}\text{C}$  and the precipitate was recovered by centrifugation for 10 min at  $10,000 \times g$  at  $4^{\circ}\text{C}$ . The supernatant was discarded, and the protein pellet was washed with cold acetone ( $-20^{\circ}\text{C}$ ) prior to suspension in 50 mM ammonium bicarbonate. Proteins were digested with proteomics-grade trypsin at ~1:50 ratio for protein:protease at  $37^{\circ}\text{C}$

overnight. The digested samples were dried in a vacuum concentrator (Labconco, Kansas city, MO) and reconstituted in 50% acetonitrile containing 0.05% acetic acid. Samples (blastomere digests) were centrifuged at  $10,000 \times g$  for 2 min prior to analysis by CE- $\mu$ ESI-HRMS. We note that depleting *Xenopus* samples lysates of abundant yolk platelets was recently shown to vastly improve protein identifications by MS,<sup>[6]</sup> suggesting further improvements possible in the number of proteins that are identifiable in single blastomeres.

**Single-cell CE- $\mu$ ESI-HRMS using a Time-of-Flight Mass Spectrometer.** Samples were measured using a single-cell CE-ESI system that we constructed based on our prototype instruments for small-molecules (metabolomics).<sup>[7]</sup> Briefly, 1  $\mu$ L of the sample was deposited into a sample loading microvial, and  $\sim 7$  nL of the peptide standard or 16 nL of the blastomere digest were hydrodynamically injected into a separation fused silica capillary (85 cm length, 40/110  $\mu$ m inner/outer diameter) by elevating its inlet end 15 cm above the outlet end for 1–3 min. Afterward, the capillary inlet was transferred into a vial that contained the background electrolyte (BGE), 25% acetonitrile acidified with formic acid to pH 2.3 ( $\sim 1$  M) measured using a combination glass electrode. This pH was chosen to suppress ionization of capillary silanol groups to minimize peptide adsorption to the wall of the separation capillary. Peptides were electrophoretically separated by applying +19 kV on the inlet end (anode) of the separation capillary using a stable high voltage power supply (model 230-30R, Spellman; Hauppauge, NY).

Peptides migrated into a custom-built microelectrospray ( $\mu$ ESI) interface that was constructed based on our earlier designs.<sup>[7-8]</sup> Briefly, the separation capillary was co-axially fed through a metal emitter capillary (130/260  $\mu$ m inner/outer diameter) with laser-cleaved ends that supplied 50% methanol (0.1% formic acid) as electrospray sheath flow. The metal emitter was earth-grounded to complete the CE electrical circuit. To ionize separated peptides with high stability and efficiency, the microelectrospray source was maintained in the cone-jet mode, the most efficient spraying regime for ion generation in the micro-flow regime.<sup>[9]</sup> To make this possible, the emitter tip of the CE- $\mu$ ESI setup was precision-positioned against the sampling plate of a mass spectrometer that was held at stable  $-1,700$  V, and the hydrodynamic behavior of the electrified liquid meniscus and the generated total ion current were continuously observed under a stereomicroscope ( $\sim 5\times$  magnification) and the mass spectrometer, respectively. Cessation of the pulsating liquid meniscus in parallel with a sudden increase in the total ion current marked the onset of the cone-jet regime.<sup>[9]</sup> Nebulizer gases, which are typically used in commercial ESI interfaces, were eliminated to help better entrain sprayed droplets into the mass spectrometer, and the CE- $\mu$ ESI interface was contained in an environmental chamber to minimize/eliminate air currents, which could disrupt stability of the Taylor cone. Hence, a unique aspect of this CE- $\mu$ ESI interface was its ability to ionize peptides in high efficiency in the cone-jet spraying regime.

Peptide ions were detected using a high-resolution Qq orthogonal acceleration time-of-flight mass spectrometer (Impact HD; Bruker Daltonics, Billerica, MA), operated at mass resolution of 40,000 full width at half maximum (FWHM). The mass spectrometer was externally mass-calibrated over the  $m/z$  250–3,000 range as recommended by the vendor. Peptide ions were mass analyzed between  $m/z$  250–3,000 at a data acquisition rate of 4 Hz. To facilitate the identification of peptides, ion signals ( $m/z$  values) were fragmented using collision-induced dissociation (CID) in nitrogen collision gas at 20–35 eV collision energy depending on the size and charge state of the ion. The data-dependent tandem HRMS (HRMS<sup>2</sup>) was performed at 4 Hz for ion intensities lower than  $3.2 \times 10^3$  counts and 15 Hz for signals above  $10^5$  counts per 1,000 summations.

The custom-built CE- $\mu$ ESI-MS instrument was characterized for analytical performance (Figure 2). Angiotensin II gave a signal-to-noise ratio of 19.9 for 167 amol peptide, indicating a lower limit of detection at  $\sim$ 25 amol ( $S/N = 3$ ) for this peptide. The concentration calibration curve was tested linear over 3 orders of magnitude for angiotensin II and leucine enkephalin, and 2 orders of magnitude for valine-tyrosine-valine (Figure 2A). Linear regression parameters: Peak area =  $b \times \text{concentration} + a$ , where  $a/b$ /regression coefficient ( $R^2$ ) parameters were: 1.19/ $-4.032$ /0.96 for Ang II; 1.14/ $-5.09$ /0.99 for LeuEnk; and 1.15/ $-4.77$ /0.99 for Val-Tyr-Val. Repeated measurement of 20 ng protein digest from the 16-cell embryo showed reproducible separation with a quantitative technical reproducibility of 11.5% standard error of the mean (S.E.M.) (Figure 2B). The biological reproducibility was 13.5% S.E.M. between different single cells from the same cell type in different 16-cell embryos (Figure 2B). This performance metrics agreed with those we recently determined for several metabolites ( $MW < 500$  Da) using single-cell CE-ESI-MS,<sup>[7b]</sup> providing a robust and quantitative platform to identify and quantify protein expression in single *Xenopus* blastomeres.

**CE- $\mu$ ESI with an Orbitrap-q-Ion Trap Mass Spectrometer.** The CE- $\mu$ ESI platform was hyphenated to an Orbitrap Fusion (Thermo Scientific) tribrid ultrahigh-resolution tandem mass spectrometer equipped with CID, higher-energy collision dissociation (HCD), and electron transfer dissociation (ETD) cells. Minor modifications were necessary to the electrospray interface to operate the electrospray source in the cone-jet spraying regime. Briefly, the tip of the electrospray emitter was fine-positioned  $\sim$ 5 mm from the sampling cone of the mass spectrometer, and +2,900 V generated by a stable high voltage power supply (P350, Stanford Research System, Sunnyvale, CA) was directly applied on the electrospray emitter. CE separations were performed by applying +19 kV on the inlet end of the separation capillary, corresponding to  $\sim$ 16 kV effective gradient across the capillary. Generated peptide ions were mass-analyzed via data-dependent acquisition, allowing for simultaneous acquisition of MS and MS/MS spectra.

Proteins were identified and quantified in data-dependent HRMS<sup>2</sup>. Survey mass spectra were measured between  $m/z$  350–1,600 in the orbitrap analyzer at a resolution of  $\sim$ 60,000 FWHM with a maximum injection time of 100 ms. To identify proteins, precursor peptide ions were isolated in the quadrupole analyzer with an isolation window of 2 Da, routed for fragmentation via HCD using 30% relative energy in nitrogen collision gas in the multipole cell, and the fragments were detected in the ion trap with “rapid” scan rate and a maximum injection time of 50 ms. Data-dependent parameters included an exclusion time of 30 s, 10 s, and 15 s after repeated fragmentation for 7 s. Fragmentation priority was set to least intense (bottom N) with a threshold of 1,000 ion counts and a total instrument cycle of 3 s.

Quantitative measurements using tandem mass tags (TMTs; Thermo) used similar instrumental settings. Single blastomeres were prepared and digested as described previously. The resulting peptides were labeled using TMT6plex labeling reagents following the manufacturer instructions with the following changes: 10  $\mu$ L of labeling reagent was added followed by 2  $\mu$ L of quenching reagent to account for the smaller amount of material present. Digests of individual D11, V11, and V21 blastomeres were labeled using the TMT6-126, TMT6-127, and TMT-128 reagents, respectively. The samples were then pooled together and dried down to completeness after which 5  $\mu$ L of 60% ACN in water containing 0.05% acetic acid was added. For each blastomere type,  $n = 3$  biological replicates were measured with each analyzed in technical duplicate or quadruplet. Quantification followed the MS<sup>2</sup> strategy used for identification (see earlier) with minor changes

to enhance quantitative coverage of the encoded proteome: maximum injection time, 50 ms; precursor isolation window, 0.8 Da; HCD collision energy, 35%; exclusion time, 10 s. Protein ratios were calculated based on the relative abundance of the reporter ions using Proteome Discoverer 2.0 (Thermo).

**NanoLC-nanoESI-HRMS.** Alternatively, peptides were separated using a nano-flow liquid chromatograph (Dionex Ultimate 3000 RSLCnano, Thermo) equipped with a 20- $\mu$ L sampling loop. Peptides were loaded onto a trapping column (C18 PepMap 100, 300  $\mu$ m ID, 5 mm length, 5  $\mu$ m beads with 100  $\text{\AA}$  pore size, Thermo) and desalted for 5 min in 0.1% formic acid at 10  $\mu$ L/min. The peptides were thereafter separated on a C18 PepMap RSLC analytical capillary column (75  $\mu$ m ID, 500 mm length, 3  $\mu$ m beads with 100  $\text{\AA}$  pore size, Thermo) using a 80 min step gradient with Solvent A (0.1% formic acid) and Solvent B (0.1% formic acid in acetonitrile) at 300 nL/min as follows: 5% B held for 5 min, B ramped from 5% to 35% in 50 min, then ramped to 50% B in 17 min, where the solvent was held at 50% B for 5 min, before decreasing B to 5% in 5 min and equilibrating the column for 10 min. Separated peptides were ionized using a nanospray ion source that employed a fused silica capillary with 10  $\mu$ m orifice (New Objective, Woburn, MA) using +2,500 V spray potential to maintain stable nanospray. The generated peptide ions were mass-analyzed using the orbitrap-quadrupole-ion trap mass spectrometer under identical instrumental setting as earlier.

**Data Analysis.** Data processing was comparable for data acquired on the TOF and orbitrap mass spectrometers. (1) *Processing of Qq-TOF Data (Bruker).* Time-of-flight data were converted to xml files using a script executed in data analysis 4.2 (Bruker Daltonics). The files were then submitted for proteomics search via ProteinScape 3.1 (Bruker) running Mascot 2.4 (Matrix Science, Inc., Boston, MA) as the search engine. The tandem MS were compared against *Xenopus laevis* proteome (NCBinr, updated on 10/2/2014) with the following settings: full trypsin digestion, a maximum of 2 missed cleavages allowed, methionine oxidation as variable modification, cysteine carbamidomethylation as fixed modification, and a mass accuracies of 20 ppm for MS and 0.5 Da for tandem MS. Protein identifications from the Qq-TOF experiments are reported with <5% false discovery rate (FDR) established against reversed decoy database. (2) *Processing of Orbitrap Fusion data (Thermo).* Raw (unprocessed) mass spectrometric data were processed using proteome Discoverer 1.4 (Thermo). Sequest HD and/or MS Amanda were chosen as search engines and *Xenopus laevis* proteome (canonical & isoforms) and Phrog (mRNA-derived)<sup>[6]</sup> as databases with the following search parameters: trypsin digestion with up to 2 missed cleavages; methionine oxidation as variable modification; cysteine carbamidomethylation as fixed modification; and mass errors were filtered to <15 ppm for precursor ions ( $MS^1$ ) and 0.5 Da for fragments ( $MS^2$ ). Peptides are reported with <1% FDR, calculated using the percolator node of Proteome Discoverer. Protein identifications are given as protein groups, where multiple isoforms of the same protein are considered as one group. Proteins from the orbitrap-quadrupole-ion trap experiments are reported with <1% FDR.

Multivariate and statistical data analysis was performed in MetaboAnalyst 3.0,<sup>[10]</sup> a data analysis and visualization pipeline. Protein abundances were estimated based on emPAI in Proteome Discoverer 2.0 and imported into MetaboAnalyst where processing used the following settings: Missing value estimation, small values ( $\sim 10^{-7}$ ); data filtering, median value; sample normalization, median; data transformation, log transformation; data scaling, range scaling.

## REFERENCES

- [1] A. H. Smits, R. G. H. Lindeboom, M. Perino, S. J. van Heeringen, G. J. C. Veenstra, M. Vermeulen, *Nucleic Acids Res.* **2014**, *42*, 9880-9891.
- [2] S. A. Moody, *Developmental Biology Protocols, Vol I* **2000**, *135*, 331-347.
- [3] *Early development of Xenopus laevis: A laboratory manual*, Cold Spring Harbor Laboratory Press, Cold Spring Harbor, NY, **2000**.
- [4] a) G. Hirose, M. Jacobson, *Dev Biol* **1979**, *71*, 191-202; b) S. A. Moody, *Dev Biol* **1987**, *119*, 560-578.
- [5] P. A. Grant, M. B. Herold, S. A. Moody, *Journal of Visualized Experiments* **2013**.
- [6] M. Wuhr, R. M. Freeman, Jr., M. Presler, M. E. Horb, L. Peshkin, S. P. Gygi, M. W. Kirschner, *Current Biology* **2014**, *24*, 1467-1475.
- [7] a) P. Nemes, S. S. Rubakhin, J. T. Aerts, J. V. Sweedler, *Nat Protoc* **2013**, *8*, 783-799; b) R. M. Onjiko, S. A. Moody, P. Nemes, *Proc. Natl. Acad. Sci. U. S. A.* **2015**, *112*, 6545-6550.
- [8] P. Nemes, A. M. Knolhoff, S. S. Rubakhin, J. V. Sweedler, *Anal. Chem.* **2011**, *83*, 6810-6817.
- [9] P. Nemes, I. Marginean, A. Vertes, *Anal. Chem.* **2007**, *79*, 3105-3116.
- [10] J. G. Xia, I. V. Sinelnikov, B. Han, D. S. Wishart, *Nucleic Acids Res.* **2015**, *43*, W251-W257.
- [11] D. Belder, A. Deege, H. Husmann, F. Kohler, M. Ludwig, *Electrophoresis* **2001**, *22*, 3813-3818.

## SUPPLEMENTARY FIGURES

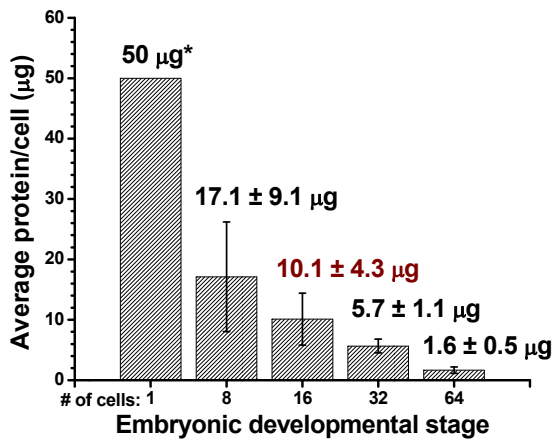

**Figure S1.** Average protein amounts in single blastomeres in *Xenopus* embryos at different developmental stages. Error bars show standard error of the mean. \*Adopted from elsewhere.<sup>[1]</sup>

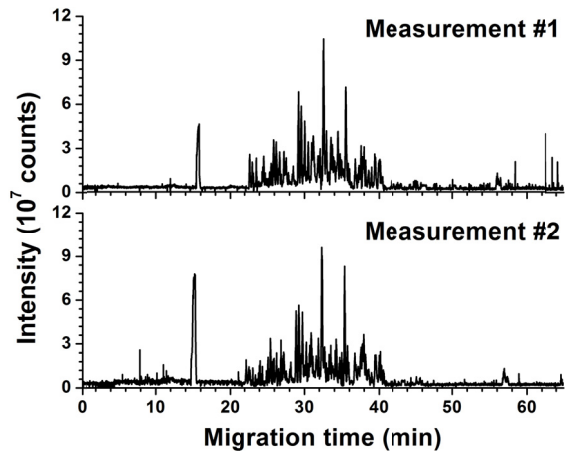

**Figure S2.** Base peak electropherograms showing reproducible CE separation for 20 ng protein digest from a 16-cell *Xenopus* embryo in technical duplicate.

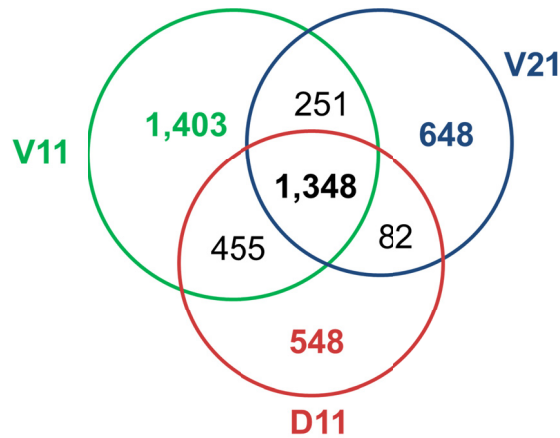

**Figure S3.** Peptide sequencing between single blastomeres in the 16-cell *Xenopus* embryo. The numbers indicate the total of different peptides that were identified between the D11, V11, and V21 cells with each measured in n = 3 biological replicates and technical duplicates.

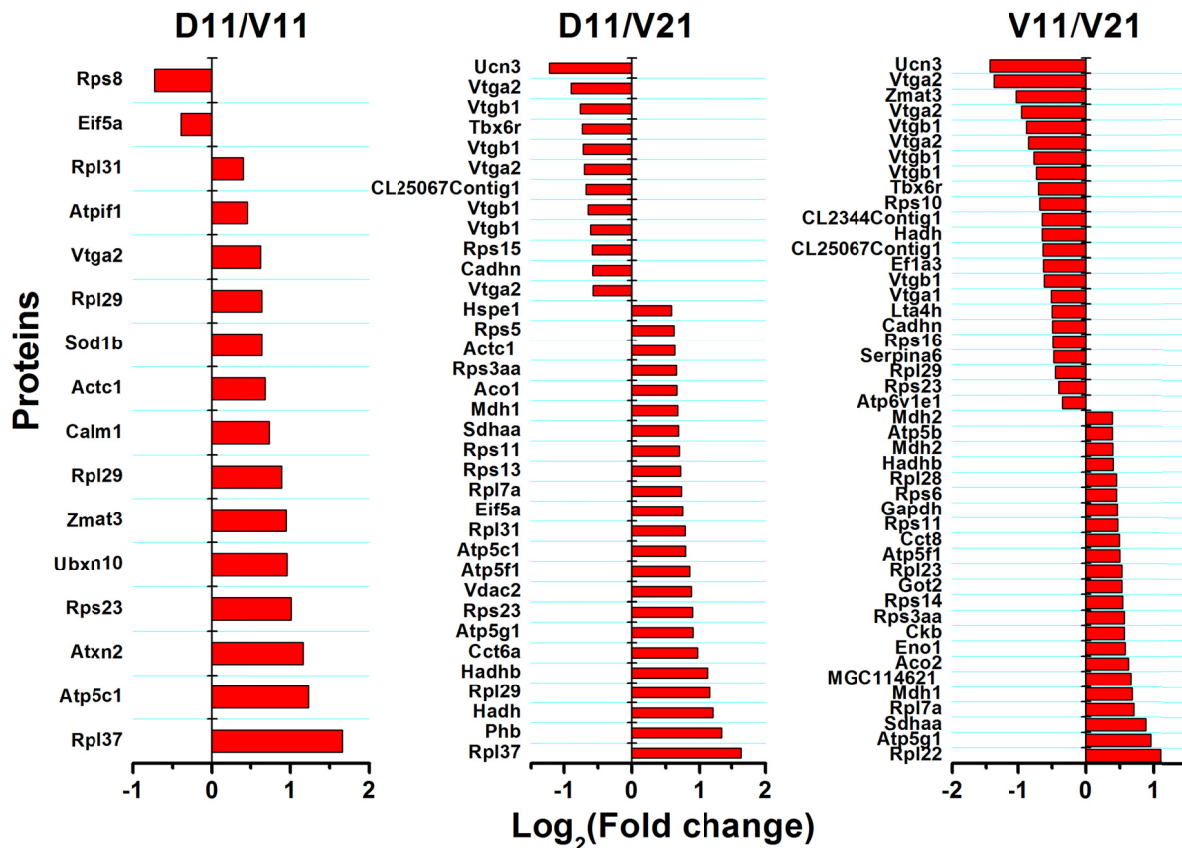

**Figure S4.** Translational cell heterogeneity revealing developmental asymmetry in the 16-cell embryo. Based on multiplexing quantification (see also Figure 3D), the proteins shown here were found to be significantly differentially expressed between D11/V11, V11/V21, and D11/V21 cell types ( $p < 0.05$  and fold change  $\geq 1.3$ ).



## SUPPLEMENTARY TABLES

**Table S1.** Reconfiguration of the single-cell proteomic workflow and the CE- $\mu$ ESI-HRMS instrument to enable progressively deeper coverage of the single-cell encoded proteome. Each new step adopted experimental conditions that were optimized in the preceding step.

| Experimental Steps | Description of Experimental Conditions                                                                                                                                                                                                                                                                                                   |
|--------------------|------------------------------------------------------------------------------------------------------------------------------------------------------------------------------------------------------------------------------------------------------------------------------------------------------------------------------------------|
| 1                  | Embryos were lysed in 1% SDS buffer and digested using trypsin (see Methods). Digests were zip-tipped (C18). Separation was performed in fused silica capillary coated with crosslinked polyvinyl alcohol using 1% formic acid as the BGE. The capillaries were coated according to the protocol described in Reference. <sup>[11]</sup> |
| 2                  | Separations were performed in a bare (uncoated) fused silica capillary using 25% ACN, 1 M formic acid as the BGE.<br>→This separation workflow was selected for the rest of the study.                                                                                                                                                   |
| 3                  | Embryos were lysed in 0.2% digitonin, digested, and measured directly (without purification via zip-tipping).                                                                                                                                                                                                                            |
| 4                  | Embryos were lysed in 1% SDS, digested, and measured directly (without purification via zip-tipping).<br>→This sample preparation workflow was selected for the rest of the study.                                                                                                                                                       |
| 5                  | Peptide sequencing was performed using: HCD with 25% collision energy, 1×fragmentation, 30-s exclusion.                                                                                                                                                                                                                                  |
| 6                  | Peptide sequencing was performed using: 35% HCD collision energy, 1×fragmentation, 30-s exclusion.                                                                                                                                                                                                                                       |
| 7                  | Peptide sequencing was performed using: 30% HCD collision energy, 1×fragmentation, 30-s exclusion.<br>→This collision energy was selected for the rest of the study.                                                                                                                                                                     |
| 8                  | Peptide sequencing was performed using: 1×fragmentation, 10-s exclusion.                                                                                                                                                                                                                                                                 |
| 9                  | Peptide sequencing was performed using: 2×fragmentation, repeat for 7 s, 15-s exclusion. Protein identification was used Sequest HT with Uniprot <i>Xenopus</i> (canonical & isoform) as database.<br>→These fragmentation conditions were selected for the rest of the study.                                                           |
| 10                 | Proteins were identified using Sequest HT with a <u>dual search engine</u> strategy that combined Uniprot <i>Xenopus</i> (canonical & isoform) and Phrog databases.                                                                                                                                                                      |
| 11                 | Proteins were identified using a <u>dual database</u> strategy that accessed Uniprot <i>Xenopus</i> (canonical & isoform) and Phrog databases via Sequest HT and MS Amanda.<br>→This dual-search engine and dual-database strategy was selected for the test of the study.                                                               |
| 12                 | Proteomic data from technical duplicates were combined.<br>→Measurement of at least two technical replicates was performed for the rest of the study.                                                                                                                                                                                    |

**Table S2.** Identification of protein groups and peptides using the single-cell CE- $\mu$ ESI-HRMS(orbitrap-quadrupole-linear ion trap) platform. Each blastomere was measured in n = 3 biological replicates and technical duplicates. Error represents standard deviation. The cumulated protein groups represent all the different protein groups identified in a specific cell type.

| <b>Cell Type</b> | <b>Identified Protein Groups<br/>Groups/Cell</b> | <b>Identified Protein Groups<br/>Cumulative</b> | <b>Identified<br/>Peptides</b> |
|------------------|--------------------------------------------------|-------------------------------------------------|--------------------------------|
| D11              | 465 $\pm$ 86                                     | 829                                             | 1,399 $\pm$ 252                |
| V11              | 608 $\pm$ 84                                     | 1,019                                           | 1,929 $\pm$ 482                |
| V21              | 460 $\pm$ 16                                     | 815                                             | 1,401 $\pm$ 135                |
| <b>Total</b>     | <b>n/a</b>                                       | <b>1,709</b>                                    | <b>4,735</b>                   |

**Table S3.** Protein identifications between D11, V11, and V21 cell types based on n = 3 biological replicates with each measured in technical duplicates.

| No. | Accession Number                     | Description                                               | Seq. Cover. (%)                                              | Σ# Proteins | Σ# Unique Peptides | Σ# Peptides | Σ# PSMs |      |
|-----|--------------------------------------|-----------------------------------------------------------|--------------------------------------------------------------|-------------|--------------------|-------------|---------|------|
| 1   | zeinaSSns_comp377268_c0_seq3         | len=241                                                   | 97.87                                                        | 1           | 1                  | 1           | 1       |      |
| 2   | dsrrswapns_comp1430289_c0_seq1       | len=213                                                   | 97.62                                                        | 1           | 1                  | 1           | 1       |      |
| 3   | Q6NTT1                               | LOC398508 protein (Fragment) OS=Xenopus laevis GN=L       | 93.00                                                        | 4           | 23                 | 23          | 1399    |      |
| 4   | Q7ZY52                               | Glyceraldehyde-3-phosphate dehydrogenase OS=Xenopus       | 90.09                                                        | 4           | 19                 | 28          | 1976    |      |
| 5   | BJ049851                             | homologue to UniRef100_Q66IR3 Cluster: MG                 | Rep: MGC85497 protein - Xenopus laevis (African clawed fi    | 89.74       | 1                  | 1           | 1       |      |
| 6   | Q8AVP8;CL8Contig14                   | Peptidyl-prolyl cis-trans isomerase OS=Xenopus laevis GN= | 89.63                                                        | 4           | 5                  | 14          | 1993    |      |
| 7   | Q6B4U5;CL4491Contig1                 | Malate dehydrogenase OS=Xenopus laevis GN=mdh2 PE=        | 88.17                                                        | 9           | 12                 | 28          | 2343    |      |
| 8   | Q8AY70;CL7950Contig1                 | Glyceraldehyde-3-phosphate dehydrogenase type B OS=Xi     | 87.99                                                        | 7           | 19                 | 27          | 2882    |      |
| 9   | Q6GR58;CL4491Contig2                 | Malate dehydrogenase OS=Xenopus laevis GN=mdh2 PE=        | 86.39                                                        | 9           | 10                 | 26          | 2392    |      |
| 10  | CL1514Contig2                        | CL1514Contig2                                             | 85.25                                                        | 4           | 3                  | 38          | 2356    |      |
| 11  | CL1514Contig1                        | CL1514Contig1                                             | 85.25                                                        | 2           | 0                  | 38          | 2308    |      |
| 12  | Q7SZB1                               | Profilin OS=Xenopus laevis GN=MGC64293 PE=2 SV=1 - [      | 84.67                                                        | 4           | 8                  | 10          | 148     |      |
| 13  | P30883;CL57Contig6                   | Tubulin beta-4 chain OS=Xenopus laevis GN=tubb4 PE=2      | 84.49                                                        | 22          | 2                  | 28          | 3016    |      |
| 14  | Q7ZWR6                               | ATP synthase subunit beta OS=Xenopus laevis GN=atp5b      | 83.81                                                        | 5           | 16                 | 32          | 2778    |      |
| 15  | O12975;CL1627Contig2                 | Fructose-bisphosphate aldolase OS=Xenopus laevis GN=al    | 83.79                                                        | 5           | 3                  | 28          | 2619    |      |
| 16  | A2BDB0                               | Actin, cytoplasmic 2 OS=Xenopus laevis GN=actg1 PE=2 S    | 83.73                                                        | 30          | 3                  | 32          | 2492    |      |
| 17  | CF270773                             | similar to UniRef100_A7SB16 Cluster: Predicted            | Rep: Predicted protein - Nematostella vectensis (Starlet see | 83.67       | 1                  | 1           | 1       |      |
| 18  | Q7ZY50                               | MGC53997 protein OS=Xenopus laevis PE=2 SV=1 - [Q7Z       | 82.47                                                        | 15          | 1                  | 27          | 1504    |      |
| 19  | Q3KPP7                               | Fructose-bisphosphate aldolase OS=Xenopus laevis GN=M     | 82.14                                                        | 8           | 2                  | 27          | 1288    |      |
| 20  | TC463468                             | vitellogenin (A1) [Xenopus laevis]                        | 81.73                                                        | 3           | 3                  | 14          | 2375    |      |
| 21  | Q8AVT0                               | MGC53543 protein OS=Xenopus laevis GN=eno1 PE=2 SV        | 80.65                                                        | 3           | 1                  | 35          | 2444    |      |
| 22  | TC462743                             | homologue to UniRef100_Q7SZF6 Cluster: Vi                 | Rep: Vitellogenin B1 - Xenopus laevis (African clawed frog)  | 80.54       | 1                  | 14          | 25      | 5428 |
| 23  | P70010                               | Nucleoside diphosphate kinase A1 OS=Xenopus laevis PE=    | 79.87                                                        | 3           | 6                  | 10          | 243     |      |
| 24  | TC435033                             | homologue to UniRef100_Q6NWX0 Cluster: A                  | Rep: ATP synthase subunit beta - Xenopus tropicalis (West    | 79.58       | 1                  | 4           | 7       | 716  |
| 25  | Q7ZWN5;CL2685Contig2                 | Triosephosphate isomerase OS=Xenopus laevis GN=tpi1 P     | 79.44                                                        | 2           | 1                  | 16          | 1325    |      |
| 26  | Q6NUG0                               | MGC79030 protein OS=Xenopus laevis GN=hspc1 PE=3 S        | 79.41                                                        | 1           | 4                  | 9           | 249     |      |
| 27  | O93400;CL3Contig45                   | Actin, cytoplasmic 1 OS=Xenopus laevis GN=actb PE=2 SV    | 79.20                                                        | 25          | 2                  | 31          | 4744    |      |
| 28  | CL1152Contig1                        | CL1152Contig1                                             | 79.13                                                        | 5           | 19                 | 40          | 1621    |      |
| 29  | CL2685Contig3                        | CL2685Contig3                                             | 79.03                                                        | 2           | 0                  | 15          | 615     |      |
| 30  | P13926                               | Superoxide dismutase [Cu-Zn] A OS=Xenopus laevis GN=s     | 78.15                                                        | 2           | 6                  | 9           | 253     |      |
| 31  | Q3B816                               | Wu:fj06d02 protein OS=Xenopus laevis GN=wu:fj06d02 PE     | 76.21                                                        | 4           | 3                  | 13          | 487     |      |
| 32  | CL964Contig2                         | CL964Contig2                                              | 75.84                                                        | 8           | 15                 | 15          | 379     |      |
| 33  | Q6NTT0                               | MGC82310 protein OS=Xenopus laevis GN=hsp12 PE=2          | 74.82                                                        | 3           | 9                  | 9           | 110     |      |
| 34  | CL1127Contig2                        | CL1127Contig2                                             | 74.07                                                        | 3           | 1                  | 12          | 1137    |      |
| 35  | dsrrswapns_comp210667_c1_seq1        | len=1119                                                  | 73.79                                                        | 2           | 0                  | 15          | 550     |      |
| 36  | Q7SYQ4                               | MGC64582 protein OS=Xenopus laevis GN=prdx6 PE=2 S        | 73.66                                                        | 5           | 10                 | 10          | 162     |      |
| 37  | CL2685Contig1                        | CL2685Contig1                                             | 73.39                                                        | 2           | 7                  | 15          | 824     |      |
| 38  | Q0IHG1;CL10048Contig1                | MGC154377 protein OS=Xenopus laevis GN=rplp2 PE=4 S       | 73.04                                                        | 2           | 5                  | 5           | 102     |      |
| 39  | CL10183Contig1                       | CL10183Contig1                                            | 72.85                                                        | 5           | 1                  | 12          | 360     |      |
| 40  | Q6GPT0;CL10608Contig1                | MGC82636 protein OS=Xenopus laevis GN=MGC82636 PE         | 72.59                                                        | 2           | 9                  | 10          | 706     |      |
| 41  | TC464539                             | similar to UniRef100_Q7SZF6 Cluster: Vitellog             | Rep: Vitellogenin B1 - Xenopus laevis (African clawed frog)  | 72.55       | 1                  | 15          | 19      | 2012 |
| 42  | Q9PSX0;CL3505Contig1                 | Fructose-bisphosphate aldolase OS=Xenopus laevis GN=al    | 72.25                                                        | 3           | 14                 | 17          | 1649    |      |
| 43  | Q6PHL6                               | Rps19-prov protein OS=Xenopus laevis GN=rps19 PE=2 S      | 71.92                                                        | 5           | 12                 | 12          | 196     |      |
| 44  | CL654Contig1                         | CL654Contig1                                              | 71.64                                                        | 1           | 2                  | 5           | 65      |      |
| 45  | Q00387;CL13623Contig1                | Serine protease inhibitor A6 OS=Xenopus laevis GN=serpir  | 70.18                                                        | 2           | 27                 | 30          | 4891    |      |
| 46  | Q6NRQ9;CL5407Contig1                 | MGC82327 protein OS=Xenopus laevis GN=MGC82327 PE         | 69.71                                                        | 5           | 14                 | 14          | 370     |      |
| 47  | Q92122;CL1152Contig2                 | Pyruvate kinase muscle isozyme OS=Xenopus laevis GN=pf    | 69.26                                                        | 5           | 7                  | 31          | 2389    |      |
| 48  | P18709                               | Vitellogenin-A2 OS=Xenopus laevis PE=1 SV=1 - [VITA2_X    | 69.06                                                        | 435         | 0                  | 223         | 55339   |      |
| 49  | P19011                               | Vitellogenin-B2 (Fragment) OS=Xenopus laevis PE=1 SV=1    | 69.01                                                        | 1           | 3                  | 7           | 3568    |      |
| 50  | CL6589Contig1                        | CL6589Contig1                                             | 68.60                                                        | 204         | 0                  | 213         | 52111   |      |
| 51  | P45695                               | Cofilin-1-A OS=Xenopus laevis GN=cf11-a PE=1 SV=3 - [C    | 67.86                                                        | 5           | 5                  | 9           | 110     |      |
| 52  | CL2400Contig2                        | CL2400Contig2                                             | 67.37                                                        | 6           | 6                  | 19          | 829     |      |
| 53  | Q66KY9                               | MGC85306 protein OS=Xenopus laevis GN=atp5d PE=2 S        | 67.28                                                        | 3           | 5                  | 5           | 144     |      |
| 54  | Q6IP60;CL654Contig2                  | Hspd1 protein OS=Xenopus laevis GN=hspd1 PE=2 SV=1        | 66.84                                                        | 3           | 7                  | 27          | 1953    |      |
| 55  | Q7ZXM8;CL3609Contig1                 | Ferritin OS=Xenopus laevis GN=ftmt PE=2 SV=1 - [Q7ZXM     | 66.67                                                        | 3           | 7                  | 7           | 167     |      |
| 56  | EB644224                             | homologue to UniRef100_Q5BKG3 Cluster: M                  | Rep: MGC108424 protein - Xenopus tropicalis (Western cla     | 66.67       | 1                  | 1           | 1       |      |
| 57  | dsrrswapns_comp212871_c1_seq1        | len=1347                                                  | 66.47                                                        | 3           | 7                  | 17          | 521     |      |
| 58  | P62155;CL1Contig1497                 | Calmodulin OS=Xenopus laevis GN=calm1 PE=1 SV=2 - [C      | 66.44                                                        | 8           | 5                  | 5           | 1376    |      |
| 59  | Q9PSN9                               | Lipovitellin 1, PCDZN=Zn(2+)- and Cd(2+)-binding protein  | 65.91                                                        | 1           | 1                  | 6           | 788     |      |
| 60  | P45593                               | Cofilin-1-B OS=Xenopus laevis GN=cf11-b PE=1 SV=3 - [C    | 64.88                                                        | 4           | 6                  | 10          | 131     |      |
| 61  | BG513260                             | homologue to UniRef100_Q7SZF6 Cluster: Vi                 | Rep: Vitellogenin B1 - Xenopus laevis (African clawed frog)  | 64.86       | 1                  | 9           | 19      | 2549 |
| 62  | zeinaSSns_comp382686_c6_seq6         | len=1587                                                  | 64.63                                                        | 9           | 1                  | 9           | 644     |      |
| 63  | Q6PAB3;dsrrswapns_comp212871_c1_seq2 | Malate dehydrogenase, cytoplasmic OS=Xenopus laevis G     | 63.77                                                        | 2           | 6                  | 17          | 620     |      |
| 64  | Q7SZF6                               | Vitellogenin B1 OS=Xenopus laevis GN=vtgb1 PE=2 SV=1      | 63.73                                                        | 3           | 171                | 202         | 56791   |      |
| 65  | Q6DJ16                               | Putative uncharacterized protein OS=Xenopus laevis PE=4   | 63.06                                                        | 6           | 3                  | 7           | 172     |      |
| 66  | dsrrswapns_comp212502_c2_seq1        | len=1736                                                  | 63.05                                                        | 2           | 14                 | 14          | 228     |      |
| 67  | A4FVF5                               | LOC100049136 protein OS=Xenopus laevis GN=LOC1000         | 62.16                                                        | 4           | 2                  | 6           | 53      |      |
| 68  | CL654Contig4                         | CL654Contig4                                              | 61.98                                                        | 3           | 5                  | 24          | 937     |      |
| 69  | Q7ZXP8                               | Eef2-prov protein OS=Xenopus laevis GN=eef2.1 PE=2 SV     | 61.66                                                        | 245         | 12                 | 35          | 1178    |      |
| 70  | TC462321                             | similar to UniRef100_P18709 Cluster: Vitellog             | Rep: Vitellogenin-A2 precursor (VTG A2) [Contains: Lipovit   | 60.98       | 1                  | 7           | 8       | 1689 |
| 71  | P02350                               | 40S ribosomal protein S3-A OS=Xenopus laevis GN=rps3-a    | 59.76                                                        | 3           | 1                  | 14          | 249     |      |
| 72  | Q7ZYT3                               | Rpls3-b protein OS=Xenopus laevis GN=rpls3-b PE=2 SV=     | 59.76                                                        | 4           | 1                  | 14          | 246     |      |
| 73  | Q7ZWP4;CL57Contig2                   | MGC53205 protein OS=Xenopus laevis GN=tubb4a PE=2         | 59.68                                                        | 7           | 4                  | 21          | 1834    |      |
| 74  | Q918J7;CL4267Contig1                 | MGC69114 protein OS=Xenopus laevis GN=tkl2 PE=2 SV=       | 59.36                                                        | 3           | 22                 | 23          | 1033    |      |
| 75  | Q7ZTL1                               | Acaa2-prov protein OS=Xenopus laevis GN=acaa2 PE=2 S      | 59.19                                                        | 255         | 14                 | 15          | 320     |      |
| 76  | Q3ZM03;CL912Contig2                  | 40S ribosomal protein SA OS=Xenopus laevis GN=rpsa PE     | 58.82                                                        | 10          | 11                 | 11          | 915     |      |
| 77  | CL21870Contig1                       | CL21870Contig1                                            | 58.71                                                        | 1           | 8                  | 8           | 162     |      |

|     |                                                     |                                                             |       |     |    |    |      |      |
|-----|-----------------------------------------------------|-------------------------------------------------------------|-------|-----|----|----|------|------|
| 78  | P15107;CL10172Contig1                               | Superoxide dismutase [Cu-Zn] B OS=Xenopus laevis GN=s       | 58.28 |     | 1  | 4  | 7    | 323  |
| 79  | Q7ZYH7;CL3329Contig1                                | Pgk1-prov protein OS=Xenopus laevis PE=2 SV=1 - [Q7ZY       | 58.27 |     | 1  | 7  | 16   | 600  |
| 80  | Q6IRQ8;CL4086Contig2                                | MGC81450 protein OS=Xenopus laevis GN=pgam1 PE=2            | 58.27 |     | 3  | 3  | 8    | 263  |
| 81  | Q6AZP8;CL4086Contig1                                | MGC82549 protein OS=Xenopus laevis GN=MGC82549 PE           | 58.27 |     | 3  | 3  | 8    | 106  |
| 82  | G3GBS3;CL10123Contig1                               | Peroxioredoxin 2 OS=Xenopus laevis GN=PRDX2 PE=2 SV         | 57.92 |     | 7  | 8  | 9    | 599  |
| 83  | dsrrswapns_comp152388_c2_seq1                       | len=240                                                     | 57.14 |     | 1  | 1  | 1    | 1    |
| 84  | Q7SZ23;CL10303Contig1                               | Gstm2-prov protein OS=Xenopus laevis GN=gstm1 PE=2 S        | 57.08 |     | 2  | 12 | 12   | 315  |
| 85  | Q5U4V6                                              | LOC397931 protein OS=Xenopus laevis GN=LOC397931 F          | 56.89 |     | 10 | 2  | 18   | 762  |
| 86  | Q6NRV3;CL1402Contig3                                | MGC81323 protein OS=Xenopus laevis GN=tuba1a PE=2           | 56.89 |     | 12 | 2  | 18   | 1249 |
| 87  | Q801S3                                              | 40S ribosomal protein S3a-A OS=Xenopus laevis GN=rps3       | 56.44 |     | 5  | 14 | 14   | 265  |
| 88  | Q8JHA7;CL8144Contig1                                | Glutathione s-transferase OS=Xenopus laevis PE=2 SV=1       | 56.19 |     | 4  | 6  | 6    | 418  |
| 89  | Q68EY5                                              | ATP synthase subunit alpha OS=Xenopus laevis GN=atp5a       | 56.06 |     | 7  | 3  | 32   | 1118 |
| 90  | P20342                                              | 40S ribosomal protein S15 OS=Xenopus laevis GN=rps15        | 55.86 |     | 6  | 5  | 5    | 165  |
| 91  | Q8AVH2;TC421129 UniRef100_Q8AVH2 Cluster: Ckb-pr    | Ckb-prov protein OS=Xenopus laevis GN=ckb PE=2 SV=1         | 55.85 |     | 11 | 4  | 16   | 645  |
| 92  | Q6GMC1;CL1Contig1214                                | MGC81889 protein OS=Xenopus laevis GN=rps27a PE=2           | 55.77 |     | 30 | 9  | 9    | 707  |
| 93  | Q9PTK6                                              | Fatvg OS=Xenopus laevis GN=fatvg PE=2 SV=1 - [Q9PTK         | 55.39 |     | 6  | 9  | 17   | 264  |
| 94  | P70011;CL60Contig6                                  | Nucleoside diphosphate kinase A2 OS=Xenopus laevis PE       | 55.19 |     | 1  | 2  | 6    | 301  |
| 95  | P17508;CL430Contig6                                 | Elongation factor 1-alpha, oocyte form OS=Xenopus laevis    | 54.66 | 340 | 2  | 22 | 1724 |      |
| 96  | Q6DJL4;CL12647Contig1                               | MGC82059 protein OS=Xenopus laevis GN=atp1f1 PE=4 S         | 54.55 |     | 3  | 6  | 6    | 312  |
| 97  | Q6INS0;CL10203Contig2                               | MGC81156 protein OS=Xenopus laevis GN=gstt1 PE=2 SV         | 54.55 |     | 7  | 9  | 9    | 176  |
| 98  | Q7SY94                                              | ATP synthase subunit alpha OS=Xenopus laevis GN=atp5a       | 54.25 |     | 4  | 2  | 30   | 1012 |
| 99  | Q68FI3                                              | D-dopachrome decarboxylase-A OS=Xenopus laevis GN=d         | 54.24 |     | 5  | 3  | 3    | 28   |
| 100 | dsrrswapns_comp132298_c0_seq1                       | len=219                                                     | 54.17 |     | 1  | 1  | 1    | 1    |
| 101 | Q6GNF4                                              | MGC82841 protein OS=Xenopus laevis GN=rps17 PE=2 S          | 54.07 |     | 3  | 6  | 6    | 185  |
| 102 | Q52L36                                              | MGC114755 protein OS=Xenopus laevis GN=cisd1 PE=4 S         | 53.40 |     | 5  | 4  | 4    | 44   |
| 103 | CL45Contig21                                        | CL45Contig21                                                | 53.21 |     | 8  | 2  | 2    | 10   |
| 104 | TC449759 homologue to UniRef100_Q28GS7 Cluster: C   | Rep: Creatine kinase, brain - Xenopus tropicalis (Western c | 53.03 |     | 9  | 3  | 14   | 214  |
| 105 | Q6DD48;CL3329Contig2                                | Pgk2 protein OS=Xenopus laevis GN=pgk1 PE=2 SV=1 - [C       | 53.00 |     | 1  | 5  | 14   | 647  |
| 106 | zeinaSSns_comp387412_c0_seq1                        | len=1966                                                    | 52.80 |     | 4  | 0  | 29   | 992  |
| 107 | Q7SZS3;CL137Contig1                                 | Aspartate aminotransferase OS=Xenopus laevis GN=got2 F      | 52.69 |     | 2  | 10 | 15   | 409  |
| 108 | CL3171Contig1                                       | CL3171Contig1                                               | 52.63 |     | 2  | 1  | 4    | 166  |
| 109 | Q7SZ77;CL50Contig6                                  | Rps11 protein OS=Xenopus laevis GN=rps11 PE=2 SV=1 -        | 52.53 | 233 |    | 8  | 9    | 220  |
| 110 | CL5313Contig2                                       | CL5313Contig2                                               | 52.33 |     | 5  | 2  | 6    | 61   |
| 111 | Q6AZS1;CL1Contig38                                  | Histone H2A OS=Xenopus laevis GN=hist1h2ad PE=2 SV=         | 52.31 |     | 24 | 4  | 4    | 48   |
| 112 | A3KMU5;CL12285Contig1                               | Death-associated protein-like 1-B OS=Xenopus laevis GN=     | 52.21 |     | 5  | 4  | 4    | 286  |
| 113 | P41116;CL818Contig6                                 | 60S ribosomal protein L8 OS=Xenopus laevis GN=rpl8 PE=      | 52.14 |     | 10 | 12 | 12   | 262  |
| 114 | TC460552 homologue to UniRef100_Q6DDD2 Cluster: H   | Rep: Heat shock 10kDa protein 1 - Xenopus tropicalis (Wes   | 52.11 |     | 1  | 2  | 4    | 91   |
| 115 | P49401;CL397Contig5                                 | 40S ribosomal protein S4 OS=Xenopus laevis GN=rps4 PE       | 52.09 |     | 12 | 13 | 13   | 151  |
| 116 | Q6IP26                                              | MGC79007 protein OS=Xenopus laevis GN=cox5a PE=2 S          | 52.03 |     | 3  | 5  | 5    | 120  |
| 117 | CL137Contig3                                        | CL137Contig3                                                | 52.01 |     | 1  | 7  | 12   | 122  |
| 118 | Q8AVT1                                              | Paics-prov protein OS=Xenopus laevis PE=2 SV=1 - [Q8AV      | 52.00 |     | 3  | 11 | 11   | 111  |
| 119 | P50886                                              | 60S ribosomal protein L22 OS=Xenopus laevis GN=rpl22 P      | 51.56 |     | 2  | 5  | 5    | 120  |
| 120 | AW783929 similar to UniRef100_Q6DFA9 Cluster: Asx11 | Rep: Asx11-prov protein - Xenopus laevis (African clawed fr | 51.47 |     | 1  | 1  | 1    | 2    |
| 121 | P62799                                              | Histone H4 OS=Xenopus laevis PE=1 SV=2 - [H4_XENLA]         | 51.46 |     | 11 | 5  | 5    | 41   |
| 122 | CL1Contig514                                        | CL1Contig514                                                | 51.37 |     | 10 | 2  | 10   | 165  |
| 123 | Q4V871                                              | MGC114621 protein OS=Xenopus laevis GN=MGC114621            | 51.33 |     | 5  | 1  | 2    | 684  |
| 124 | Q6P699                                              | MGC68562 protein OS=Xenopus laevis GN=rplp1 PE=4 SV         | 51.33 |     | 5  | 1  | 2    | 473  |
| 125 | Q3B8I3;CL3171Contig2                                | MGC130910 protein OS=Xenopus laevis GN=rpl7 PE=2 SV         | 51.22 |     | 5  | 9  | 12   | 475  |
| 126 | Q52KY1;CL6681Contig1                                | Vdac2 protein OS=Xenopus laevis GN=vdac2 PE=2 SV=1 -        | 50.88 |     | 3  | 8  | 8    | 388  |
| 127 | Q6GNF2                                              | MGC82844 protein OS=Xenopus laevis GN=rpl30 PE=3 SV         | 50.86 |     | 6  | 4  | 4    | 158  |
| 128 | Q8AVW0;CL561Contig9                                 | Rpl12-prov protein OS=Xenopus laevis GN=rpl12 PE=2 SV       | 50.30 |     | 6  | 6  | 6    | 403  |
| 129 | CL801Contig1                                        | CL801Contig1                                                | 49.88 |     | 16 | 5  | 27   | 921  |
| 130 | Q6PH94;TC467404 UniRef100_Q6PH94 Cluster: 40S rib   | 40S ribosomal protein S12 OS=Xenopus laevis GN=rps12 F      | 49.24 |     | 8  | 6  | 6    | 205  |
| 131 | Q3KQ54;CL6751Contig1                                | MGC130953 protein OS=Xenopus laevis GN=atic PE=2 SV         | 49.24 |     | 4  | 3  | 18   | 244  |
| 132 | Q6NTU4                                              | Park7 protein OS=Xenopus laevis GN=park7 PE=2 SV=1 -        | 49.21 |     | 8  | 7  | 7    | 92   |
| 133 | dsrrswapns_comp215407_c5_seq3                       | len=354                                                     | 49.09 |     | 3  | 1  | 1    | 1    |
| 134 | Q8AVI3                                              | Arbp-prov protein OS=Xenopus laevis GN=rplp0 PE=2 SV=       | 48.89 |     | 2  | 1  | 10   | 242  |
| 135 | dsrrswapns_comp208676_c3_seq2                       | len=1311                                                    | 48.73 |     | 2  | 1  | 10   | 228  |
| 136 | Q76BK2;CL10087Contig1                               | Macrophage migration inhibitory factor OS=Xenopus laevis    | 48.70 |     | 1  | 3  | 3    | 21   |
| 137 | CL5832Contig1                                       | CL5832Contig1                                               | 48.59 |     | 1  | 11 | 17   | 367  |
| 138 | A1L3K7                                              | Enolase A OS=Xenopus laevis GN=LOC100037034 PE=2            | 48.39 |     | 2  | 4  | 21   | 1468 |
| 139 | CL34839Contig1                                      | CL34839Contig1                                              | 48.19 |     | 1  | 1  | 1    | 2    |
| 140 | Q7ZYP8                                              | LOC495278 protein (Fragment) OS=Xenopus laevis GN=L         | 47.77 |     | 11 | 14 | 14   | 164  |
| 141 | Q91733                                              | EEF1D protein OS=Xenopus laevis GN=EEF1D PE=2 SV=           | 47.31 |     | 20 | 7  | 8    | 350  |
| 142 | CL348Contig2                                        | CL348Contig2                                                | 47.14 |     | 8  | 3  | 3    | 42   |
| 143 | P04751;CL3Contig43                                  | Actin, alpha cardiac muscle 1 OS=Xenopus laevis GN=actc     | 46.95 |     | 28 | 2  | 21   | 2612 |
| 144 | P02362                                              | 40S ribosomal protein S7 OS=Xenopus laevis GN=rps7 PE       | 46.91 |     | 6  | 6  | 6    | 48   |
| 145 | Q6DJ10                                              | 40S ribosomal protein S8 OS=Xenopus laevis GN=MGC83         | 46.63 |     | 9  | 10 | 10   | 403  |
| 146 | Q66KP7;CL5026Contig1                                | MGC85550 protein OS=Xenopus laevis GN=rps28p9 PE=4          | 46.38 |     | 3  | 3  | 3    | 12   |
| 147 | Q64116                                              | LOC494638 protein OS=Xenopus laevis GN=LOC494638 F          | 46.04 |     | 4  | 6  | 14   | 285  |
| 148 | P17507                                              | Elongation factor 1-alpha, oocyte form OS=Xenopus laevis    | 45.99 | 336 |    | 1  | 20   | 938  |
| 149 | Q6NTP7;CL640Contig5                                 | LOC398139 protein OS=Xenopus laevis GN=LOC398139 F          | 45.91 |     | 4  | 7  | 21   | 332  |
| 150 | TC428477 homologue to UniRef100_UPI00006A0177 Cl    | Rep: Methylenetetrahydrofolate reductase (EC 1.5.1.20). -   | 45.83 |     | 1  | 1  | 1    | 1    |
| 151 | Q6DD55;CL437Contig2                                 | P4hb protein OS=Xenopus laevis GN=p4hb PE=2 SV=1 - [C       | 45.45 |     | 5  | 10 | 15   | 299  |
| 152 | Q7ZWY6                                              | Rpl9-prov protein OS=Xenopus laevis GN=rpl9 PE=2 SV=1       | 44.79 | 294 |    | 1  | 7    | 41   |
| 153 | BU910031 UniRef100_Q7ZXF2 Cluster: Hnrpa0-prov pro  | Rep: Hnrpa0-prov protein - Xenopus laevis (African clawed   | 44.71 |     | 1  | 1  | 1    | 1    |
| 154 | dsrrswapns_comp212852_c6_seq1                       | len=214                                                     | 44.44 |     | 1  | 1  | 1    | 2    |
| 155 | Q5PPT1;CL4954Contig2                                | LOC496089 protein OS=Xenopus laevis GN=LOC496089 F          | 44.40 |     | 3  | 6  | 7    | 85   |
| 156 | CL1Contig1406                                       | CL1Contig1406                                               | 44.31 |     | 9  | 4  | 14   | 319  |
| 157 | Q6GNH1                                              | MGC82808 protein OS=Xenopus laevis GN=rpl23 PE=2 SV         | 44.29 |     | 4  | 5  | 5    | 99   |
| 158 | O42193;CL1Contig277                                 | MGC64314 protein OS=Xenopus laevis GN=ranp1 PE=2            | 44.02 |     | 4  | 3  | 5    | 102  |
| 159 | Q3KQC9                                              | Rps16 protein OS=Xenopus laevis GN=rps16 PE=2 SV=1 -        | 43.84 |     | 6  | 8  | 8    | 105  |
| 160 | A1L2N5;CL26379Contig1                               | LOC100036902 protein OS=Xenopus laevis GN=LOC1000           | 43.50 |     | 5  | 2  | 15   | 1638 |
| 161 | CL27242Contig1                                      | CL27242Contig1                                              | 43.24 |     | 1  | 1  | 1    | 5    |
| 162 | B7ZP28;CL315Contig4                                 | Thymosin beta 4 peptide OS=Xenopus laevis GN=tmsb4x F       | 43.18 |     | 4  | 2  | 2    | 18   |
| 163 | Q5FWK8                                              | MGC85124 protein OS=Xenopus laevis GN=alox12b PE=2          | 43.13 |     | 4  | 16 | 20   | 516  |

|     |                                                    |                                                              |       |     |    |    |    |     |
|-----|----------------------------------------------------|--------------------------------------------------------------|-------|-----|----|----|----|-----|
| 164 | Q7ZTM0                                             | Cct5-prov protein OS=Xenopus laevis GN=cct5 PE=2 SV=1        | 43.07 |     | 6  | 6  | 11 | 188 |
| 165 | Q6NTR9;CL10023Contig1                              | MGC82428 protein OS=Xenopus laevis GN=cox6b1 PE=4            | 43.02 |     | 5  | 4  | 4  | 64  |
| 166 | Q7TON8;CL7665Contig1                               | Hadhsc-prov protein OS=Xenopus laevis GN=hadh PE=2 S         | 42.81 |     | 2  | 7  | 7  | 85  |
| 167 | Q6GQC6;CL14883Contig1                              | MGC80163 protein OS=Xenopus laevis GN=MGC80163 PE            | 42.61 |     | 1  | 3  | 3  | 20  |
| 168 | BJ047835 homologue to UniRef100_Q6GL21 Cluster: Re | Rep: Receptor-associated protein of the synapse, 43kD - Xi   | 42.50 |     | 1  | 1  | 1  | 3   |
| 169 | Q7ZYF2;CL1415Contig2                               | Translationally-controlled tumor protein homolog OS=Xeno     | 42.44 |     | 2  | 5  | 5  | 145 |
| 170 | Q6GND4                                             | Dbia protein OS=Xenopus laevis GN=dbi PE=4 SV=1 - [Q6        | 42.35 |     | 3  | 1  | 3  | 46  |
| 171 | TC427947 similar to UniRef100_UPI0000660DD4 Cluste | Rep: Homolog of Homo sapiens "Splice Isoform Long of ES      | 42.33 |     | 4  | 5  | 6  | 27  |
| 172 | Q6GP33;CL5832Contig2                               | Glucose-6-phosphate isomerase OS=Xenopus laevis GN=g         | 42.13 |     | 1  | 6  | 13 | 313 |
| 173 | CF283899 homologue to UniRef100_Q642S1 Cluster: M  | Rep: MGC81934 protein - Xenopus laevis (African clawed f     | 42.03 |     | 1  | 1  | 1  | 1   |
| 174 | Q6AZL9                                             | MGC86316 protein OS=Xenopus laevis GN=rps23 PE=2 S'          | 41.96 |     | 5  | 6  | 6  | 65  |
| 175 | dsrrswapns_comp155943_c0_seq1                      | len=235                                                      | 41.67 |     | 1  | 1  | 1  | 1   |
| 176 | CL1402Contig2                                      | CL1402Contig2                                                | 41.58 |     | 6  | 0  | 9  | 404 |
| 177 | Q7ZYF7;CL1612Contig4                               | MGC53103 protein OS=Xenopus laevis GN=phb PE=2 SV=           | 41.54 |     | 3  | 2  | 7  | 126 |
| 178 | P51893                                             | Adenosylhomocysteinase A OS=Xenopus laevis GN=ahcy-          | 41.34 |     | 5  | 1  | 13 | 217 |
| 179 | O93477                                             | Adenosylhomocysteinase B OS=Xenopus laevis GN=ahcy-          | 41.34 |     | 5  | 1  | 13 | 214 |
| 180 | Q6INN4;CL17153Contig1                              | MGC82295 protein OS=Xenopus laevis GN=cox5b.2 PE=2           | 41.22 |     | 1  | 5  | 5  | 29  |
| 181 | Q4QR22;CL4816Contig2                               | MGC114925 protein OS=Xenopus laevis GN=MGC114925             | 41.14 |     | 6  | 8  | 8  | 72  |
| 182 | Q6AZJ9                                             | 40S ribosomal protein S21 OS=Xenopus laevis GN=rps21 f       | 40.96 |     | 2  | 3  | 3  | 8   |
| 183 | CD099718 homologue to UniRef100_Q641D7 Cluster: U  | Rep: Ubiquitin carboxyl-terminal hydrolase - Xenopus laevis  | 40.91 |     | 1  | 1  | 1  | 1   |
| 184 | Q0IH31                                             | MGC154809 protein OS=Xenopus laevis GN=snrpg PE=4            | 40.79 |     | 1  | 1  | 1  | 1   |
| 185 | Q07254                                             | 40S ribosomal protein S10 OS=Xenopus laevis GN=rps10 f       | 40.61 | 233 |    | 1  | 6  | 26  |
| 186 | P47904;CL48Contig2                                 | 40S ribosomal protein S27 OS=Xenopus laevis GN=rps27 f       | 40.48 |     | 5  | 2  | 4  | 95  |
| 187 | Q6ING0                                             | LOC443576 protein (Fragment) OS=Xenopus laevis GN=L          | 40.47 |     | 4  | 1  | 16 | 139 |
| 188 | P52301;CL872Contig1                                | GTP-binding nuclear protein Ran OS=Xenopus laevis GN=i       | 40.28 |     | 5  | 8  | 8  | 178 |
| 189 | CL29572Contig1                                     | CL29572Contig1                                               | 40.28 |     | 1  | 1  | 1  | 1   |
| 190 | Q6GPY3                                             | MGC82521 protein OS=Xenopus laevis GN=prdx5 PE=2 S'          | 40.21 |     | 3  | 5  | 5  | 70  |
| 191 | Q7ZXK4                                             | Rpl10-prov protein OS=Xenopus laevis GN=rpl10 PE=2 SV        | 40.00 |     | 10 | 2  | 7  | 147 |
| 192 | Q6DJG5                                             | MGC84307 protein OS=Xenopus laevis GN=cox4i2 PE=2 S          | 39.66 |     | 4  | 5  | 5  | 180 |
| 193 | Q6PF20;CL1Contig1255                               | Pcna-A protein OS=Xenopus laevis GN=pcna PE=2 SV=1 -         | 39.46 |     | 5  | 6  | 6  | 208 |
| 194 | TC451860 homologue to UniRef100_Q5RJU8 Cluster: P  | Rep: Proteasome (Prosome macropain) subunit beta type 4      | 39.42 |     | 2  | 1  | 2  | 5   |
| 195 | Q6DKB9                                             | MGC84375 protein OS=Xenopus laevis GN=aco2 PE=2 SV           | 39.39 |     | 3  | 4  | 18 | 150 |
| 196 | dsrrswapns_comp141446_c0_seq1                      | len=239                                                      | 39.34 |     | 1  | 1  | 1  | 1   |
| 197 | CL3868Contig2                                      | CL3868Contig2                                                | 39.19 |     | 5  | 1  | 2  | 285 |
| 198 | Q6GR11                                             | MGC81430 protein OS=Xenopus laevis GN=vdac3 PE=2 S           | 38.87 |     | 2  | 5  | 5  | 54  |
| 199 | Q8AVE2;CL52Contig20                                | Hsc70 protein OS=Xenopus laevis GN=hspa1i PE=2 SV=1          | 38.77 | 23  |    | 8  | 18 | 777 |
| 200 | Q66KX3                                             | MGC85348 protein OS=Xenopus laevis GN=rpl23a PE=2 S          | 38.71 |     | 7  | 5  | 5  | 60  |
| 201 | Q6AZV3;CL1Contig1336                               | MGC78885 protein OS=Xenopus laevis GN=rpl17 PE=2 SV          | 38.59 |     | 6  | 7  | 7  | 80  |
| 202 | CL3082Contig2                                      | CL3082Contig2                                                | 38.57 |     | 10 | 11 | 11 | 116 |
| 203 | P26642                                             | Elongation factor 1-gamma-A OS=Xenopus laevis GN=eef1        | 38.53 |     | 10 | 9  | 15 | 345 |
| 204 | TC443713 homologue to UniRef100_Q6UTE6 Cluster: S  | Rep: Superoxide dismutase - Xenopus laevis (African clawe    | 38.51 |     | 1  | 1  | 3  | 13  |
| 205 | Q7SZA8;CL926Contig3                                | 60S ribosomal protein L18 OS=Xenopus laevis GN=rpl18 P       | 38.30 |     | 5  | 2  | 6  | 93  |
| 206 | CL78Contig6                                        | CL78Contig6                                                  | 38.14 | 26  |    | 1  | 12 | 128 |
| 207 | Q7ZWU3;CL1744Contig1                               | Grp58-prov protein OS=Xenopus laevis GN=pdia3 PE=2 SV        | 38.05 |     | 2  | 7  | 15 | 558 |
| 208 | Q7SZB4                                             | 60S ribosomal protein L37a OS=Xenopus laevis GN=rpl37a       | 38.04 |     | 4  | 3  | 3  | 29  |
| 209 | TC447025 homologue to UniRef100_P42119 Cluster: L- | Rep: L-lactate dehydrogenase B chain - Xenopus laevis (Af    | 37.90 |     | 2  | 3  | 16 | 520 |
| 210 | CL1744Contig3                                      | CL1744Contig3                                                | 37.89 |     | 1  | 3  | 5  | 90  |
| 211 | dsrrswapns_comp217493_c0_seq4                      | len=523                                                      | 37.88 |     | 1  | 1  | 1  | 2   |
| 212 | dsrrswapns_comp203070_c1_seq1                      | len=343                                                      | 37.76 |     | 1  | 1  | 1  | 1   |
| 213 | Q4FZQ7                                             | MGC116425 protein OS=Xenopus laevis GN=rpl35 PE=2 S          | 37.40 | 296 |    | 5  | 7  | 20  |
| 214 | CL1Contig724                                       | CL1Contig724                                                 | 37.39 |     | 2  | 3  | 3  | 23  |
| 215 | TC466521 homologue to UniRef100_Q281Y1 Cluster: Ba | Rep: Basic transcription factor 3 - Xenopus tropicalis (West | 37.30 |     | 6  | 2  | 2  | 9   |
| 216 | Q6NTS1;CL21114Contig3                              | MGC82400 protein OS=Xenopus laevis GN=MGC82400 PE            | 37.27 |     | 1  | 2  | 5  | 113 |
| 217 | DC042719 homologue to UniRef100_O93400 Cluster: Ac | Rep: Actin, cytoplasmic 1 - Xenopus laevis (African clawed   | 37.10 |     | 1  | 4  | 16 | 774 |
| 218 | Q4KLF5;CL749Contig1                                | Transcription factor BTF3 homolog 4 OS=Xenopus laevis G      | 36.71 |     | 1  | 2  | 2  | 19  |
| 219 | Q8AVE3;CL2028Contig2                               | Hspa5 protein OS=Xenopus laevis GN=hspa5 PE=2 SV=1 -         | 36.64 |     | 7  | 15 | 15 | 370 |
| 220 | Q9I9M9                                             | Adenine nucleotide translocase OS=Xenopus laevis GN=sl       | 36.58 |     | 12 | 10 | 10 | 274 |
| 221 | Q7SZB2;CL4738Contig1                               | Rpl27a protein OS=Xenopus laevis GN=rpl27a PE=2 SV=1         | 36.49 |     | 2  | 5  | 5  | 213 |
| 222 | Q6PB22;CL8454Contig1                               | MGC68500 protein OS=Xenopus laevis GN=MGC68500 PE            | 36.39 |     | 3  | 7  | 7  | 249 |
| 223 | zeinaSSns_comp30958_c0_seq1                        | len=202                                                      | 36.36 |     | 1  | 1  | 1  | 1   |
| 224 | Q6INB6;CL4908Contig2                               | ATP synthase gamma chain OS=Xenopus laevis GN=atp5c          | 36.05 |     | 4  | 3  | 6  | 37  |
| 225 | Q6IRP7;CL21114Contig1                              | MGC82361 protein OS=Xenopus laevis GN=atp5h PE=2 S'          | 36.02 |     | 1  | 2  | 5  | 56  |
| 226 | dsrrswapns_comp212624_c0_seq1                      | len=1012                                                     | 35.94 |     | 3  | 1  | 1  | 1   |
| 227 | CL11Contig16                                       | CL11Contig16                                                 | 35.72 |     | 12 | 3  | 18 | 283 |
| 228 | Q7ZXG3;CL107Contig4                                | Iff-2-prov protein OS=Xenopus laevis GN=eif5a PE=2 SV=1      | 35.71 |     | 6  | 2  | 4  | 170 |
| 229 | dsrrswapns_comp187699_c1_seq1                      | len=281                                                      | 35.59 |     | 1  | 1  | 1  | 1   |
| 230 | CL1744Contig2                                      | CL1744Contig2                                                | 35.55 |     | 1  | 2  | 8  | 91  |
| 231 | Q3KQ82                                             | Profilin OS=Xenopus laevis GN=pfm1 PE=2 SV=1 - [Q3KQ8        | 35.51 |     | 3  | 1  | 3  | 7   |
| 232 | CL384Contig6                                       | CL384Contig6                                                 | 35.48 |     | 11 | 11 | 11 | 116 |
| 233 | dsrrswapns_comp204498_c2_seq1                      | len=254                                                      | 35.48 |     | 1  | 1  | 1  | 1   |
| 234 | Q6AZV1                                             | Hsp90beta OS=Xenopus laevis GN=hsp90ab1 PE=2 SV=1            | 35.46 |     | 14 | 3  | 20 | 314 |
| 235 | Q7ZXH6;CL593Contig5                                | Ywhaq-prov protein OS=Xenopus laevis GN=ywhaq PE=2 S         | 35.37 |     | 10 | 2  | 5  | 110 |
| 236 | Q6GP18;CL116Contig7                                | Superoxide dismutase OS=Xenopus laevis GN=MGC8073            | 35.27 |     | 3  | 3  | 5  | 82  |
| 237 | Q5U5A6                                             | Notch-regulated ankyrin repeat-containing protein OS=Xen     | 35.09 |     | 1  | 1  | 1  | 1   |
| 238 | Q7ZYS8;CL560Contig6                                | 60S ribosomal protein L10a OS=Xenopus laevis GN=rpl10a       | 35.02 |     | 6  | 7  | 7  | 225 |
| 239 | Q7SY83                                             | MGC64447 protein OS=Xenopus laevis PE=2 SV=1 - [Q7S          | 34.93 |     | 4  | 2  | 7  | 64  |
| 240 | Q6GNV0                                             | MGC80858 protein OS=Xenopus laevis GN=pa2g4 PE=2 S           | 34.62 |     | 3  | 1  | 8  | 54  |
| 241 | CL1634Contig3                                      | CL1634Contig3                                                | 34.62 |     | 4  | 1  | 8  | 42  |
| 242 | Q6DD58;CL18845Contig1                              | Mec-12 protein OS=Xenopus laevis GN=tuba4b PE=2 SV=          | 34.60 |     | 7  | 2  | 10 | 318 |
| 243 | Q7SZ34;CL1198Contig2                               | Stathmin OS=Xenopus laevis GN=stmn1 PE=2 SV=1 - [Q7          | 34.48 |     | 15 | 5  | 6  | 29  |
| 244 | dsrrswapns_comp1629_c0_seq1                        | len=224                                                      | 34.48 |     | 1  | 1  | 1  | 1   |
| 245 | CL1Contig796                                       | CL1Contig796                                                 | 34.42 |     | 7  | 1  | 6  | 135 |
| 246 | Q9DED4;TC439103 UniRef100_Q9DED4 Cluster: Cold-i   | Cold-inducible RNA-binding protein B OS=Xenopus laevis (     | 34.34 |     | 11 | 3  | 6  | 140 |
| 247 | Q6GPS9                                             | MGC82638 protein OS=Xenopus laevis GN=hadha PE=2 S           | 34.34 | 485 |    | 1  | 14 | 108 |
| 248 | dsrrswapns_comp200116_c3_seq1                      | len=328                                                      | 34.33 |     | 1  | 1  | 1  | 1   |
| 249 | Q6GQ64                                             | Thioredoxin OS=Xenopus laevis GN=MGC80314 PE=3 SV:           | 34.29 |     | 2  | 2  | 2  | 2   |

|     |                                                     |                                                               |       |  |     |  |    |  |      |
|-----|-----------------------------------------------------|---------------------------------------------------------------|-------|--|-----|--|----|--|------|
| 250 | Q6NTT2                                              | MGC82306 protein OS=Xenopus laevis GN=rps18 PE=2 S            | 34.21 |  | 7   |  | 7  |  | 104  |
| 251 | dsrrswapns_comp482840_c0_seq1                       | len=431                                                       | 34.15 |  | 1   |  | 1  |  | 1    |
| 252 | Q6DJN5;dsrrswapns_comp211046_c0_seq2                | 60S ribosomal protein L13 OS=Xenopus laevis GN=rpl13 P        | 34.12 |  | 8   |  | 7  |  | 160  |
| 253 | Q7ZSY1;CL6511Contig1                                | Galectin family xgalectin-VIIa OS=Xenopus laevis GN=lgals     | 34.10 |  | 2   |  | 7  |  | 74   |
| 254 | Q7SZU3;TC455791 UniRef100_Q7SZU3 Cluster: Rps10     | Rps10-prov protein OS=Xenopus laevis PE=2 SV=1 - [Q7S         | 33.94 |  | 5   |  | 1  |  | 43   |
| 255 | CL569Contig8                                        | CL569Contig8                                                  | 33.93 |  | 1   |  | 1  |  | 25   |
| 256 | Q4QR32                                              | MGC114875 protein OS=Xenopus laevis GN=rps29 PE=4 S           | 33.93 |  | 1   |  | 1  |  | 27   |
| 257 | CL24855Contig1                                      | CL24855Contig1                                                | 33.68 |  | 1   |  | 1  |  | 32   |
| 258 | TC427469 homologue to UniRef100_Q6GMA6 Cluster: M   | Rep: MGC81949 protein - Xenopus laevis (African clawed f      | 33.53 |  | 2   |  | 3  |  | 46   |
| 259 | Q7TOR9                                              | Rps2e protein OS=Xenopus laevis GN=rps2 PE=2 SV=1 - [         | 33.45 |  | 15  |  | 8  |  | 215  |
| 260 | P08429;CL92Contig5                                  | 60S ribosomal protein L4-A OS=Xenopus laevis GN=rpl4-a        | 33.33 |  | 501 |  | 10 |  | 335  |
| 261 | Q6NRY1;CL6842Contig1                                | MGC81067 protein OS=Xenopus laevis GN=habp4 PE=2 S            | 33.25 |  | 1   |  | 7  |  | 338  |
| 262 | Q8AVX2;CL1548Contig2                                | Rpl5-a protein OS=Xenopus laevis GN=rpl5 PE=2 SV=1 - [f       | 33.11 |  | 3   |  | 5  |  | 244  |
| 263 | Q6GPP8                                              | MGC82702 protein OS=Xenopus laevis GN=hba-15 PE=2 S           | 33.09 |  | 12  |  | 4  |  | 141  |
| 264 | TC433738 homologue to UniRef100_Q6P2W6 Cluster: E   | Rep: Elongation factor Tu - Xenopus tropicalis (Western cla   | 32.95 |  | 6   |  | 6  |  | 27   |
| 265 | zeinaSSns_comp389457_c1_seq2                        | len=2398                                                      | 32.95 |  | 2   |  | 1  |  | 93   |
| 266 | BP731916 homologue to UniRef100_UPI00006A037D Cl    | Rep: Pre-B-cell leukemia transcription factor 3 (Homeobox i   | 32.79 |  | 1   |  | 1  |  | 1    |
| 267 | P23403;CL22Contig8                                  | 40S ribosomal protein S20 OS=Xenopus laevis GN=rps20 I        | 32.77 |  | 6   |  | 3  |  | 141  |
| 268 | Q5PQ49;CL12806Contig1                               | LOC495981 protein OS=Xenopus laevis GN=LOC495981 F            | 32.65 |  | 2   |  | 4  |  | 68   |
| 269 | dsrrswapns_comp181463_c0_seq1                       | len=389                                                       | 32.65 |  | 1   |  | 1  |  | 1    |
| 270 | P39017;CL2323Contig1                                | 40S ribosomal protein S6 OS=Xenopus laevis GN=rps6 PE         | 32.53 |  | 5   |  | 5  |  | 132  |
| 271 | Q0IH65                                              | LOC733268 protein OS=Xenopus laevis GN=LOC733268 F            | 32.38 |  | 3   |  | 2  |  | 62   |
| 272 | TC469090 homologue to UniRef100_P18709 Cluster: Vit | Rep: Vitellogenin-A2 precursor (VTG A2) [Contains: Lipovit    | 32.37 |  | 1   |  | 7  |  | 1373 |
| 273 | CL1144Contig4                                       | CL1144Contig4                                                 | 32.24 |  | 3   |  | 1  |  | 99   |
| 274 | CL4254Contig2                                       | CL4254Contig2                                                 | 32.14 |  | 3   |  | 1  |  | 531  |
| 275 | Q8AVB7;CL2995Contig1                                | Cct2-prov protein OS=Xenopus laevis GN=cct2 PE=2 SV=1         | 31.59 |  | 2   |  | 4  |  | 114  |
| 276 | Q6GR06;CL3748Contig2                                | MGC81473 protein OS=Xenopus laevis GN=cbx3 PE=2 SV            | 31.41 |  | 1   |  | 3  |  | 48   |
| 277 | P50143;CL5141Contig1                                | T-complex protein 1 subunit gamma OS=Xenopus laevis Gl        | 31.26 |  | 2   |  | 12 |  | 226  |
| 278 | dsrrswapns_comp182460_c0_seq1                       | len=504                                                       | 31.25 |  | 1   |  | 1  |  | 1    |
| 279 | P24495;CL4026Contig1                                | Proteasome subunit alpha type-2 OS=Xenopus laevis GN=         | 31.20 |  | 3   |  | 4  |  | 18   |
| 280 | dsrrswapns_comp209695_c7_seq1                       | len=840                                                       | 31.16 |  | 1   |  | 1  |  | 1    |
| 281 | dsrrswapns_comp145349_c0_seq1                       | len=620                                                       | 31.11 |  | 1   |  | 1  |  | 1    |
| 282 | A1A638;CL11731Contig1                               | Ddb1 protein OS=Xenopus laevis GN=dbi PE=4 SV=1 - [A1         | 31.03 |  | 2   |  | 1  |  | 22   |
| 283 | TC456376 homologue to UniRef100_UPI000069D8DA C     | Rep: Ubiquinol-cytochrome c reductase complex 11 kDa pr       | 31.03 |  | 6   |  | 1  |  | 28   |
| 284 | CL1144Contig2                                       | CL1144Contig2                                                 | 30.85 |  | 5   |  | 9  |  | 89   |
| 285 | Q6GN66;CL2418Contig1                                | T-complex protein 1 subunit delta OS=Xenopus laevis GN=       | 30.80 |  | 4   |  | 2  |  | 272  |
| 286 | DR717088 homologue to UniRef100_UPI000069D998 Cl    | Rep: AT-rich interactive domain-containing protein 1B (ARIL   | 30.77 |  | 1   |  | 1  |  | 1    |
| 287 | Q7SZ87                                              | MGC64430 protein OS=Xenopus laevis GN=rpl28 PE=2 SV           | 30.66 |  | 290 |  | 1  |  | 25   |
| 288 | Q66KV6;CL1Contig276                                 | LOC100101273 protein OS=Xenopus laevis GN=rpl28 PE=           | 30.66 |  | 291 |  | 1  |  | 23   |
| 289 | Q6DCT5;CL7695Contig1                                | MGC80785 protein OS=Xenopus laevis GN=aldh2 PE=2 S            | 30.52 |  | 1   |  | 9  |  | 165  |
| 290 | dsrrswapns_comp195565_c1_seq1                       | len=284                                                       | 30.51 |  | 1   |  | 1  |  | 1    |
| 291 | A1L3K2;CL19654Contig1                               | Pyruvate kinase OS=Xenopus laevis GN=LOC100037030 F           | 30.32 |  | 4   |  | 1  |  | 1093 |
| 292 | dsrrswapns_comp197002_c0_seq1                       | len=449                                                       | 30.23 |  | 1   |  | 1  |  | 1    |
| 293 | Q5XGW4;CL2418Contig2                                | T-complex protein 1 subunit delta OS=Xenopus laevis GN=       | 30.13 |  | 5   |  | 2  |  | 193  |
| 294 | CL48Contig6                                         | CL48Contig6                                                   | 30.09 |  | 5   |  | 1  |  | 27   |
| 295 | Q66KY6;CL384Contig8                                 | MGC85310 protein OS=Xenopus laevis GN=rpl11 PE=2 SV           | 29.94 |  | 9   |  | 4  |  | 296  |
| 296 | Q4FZP9                                              | MGC116466 protein OS=Xenopus laevis GN=MGC116466              | 29.88 |  | 4   |  | 1  |  | 17   |
| 297 | P09897                                              | 60S ribosomal protein L18-A OS=Xenopus laevis GN=rpl18        | 29.79 |  | 228 |  | 1  |  | 63   |
| 298 | Q6NU90;CL8453Contig1                                | MGC81140 protein OS=Xenopus laevis GN=lap3 PE=2 SV:           | 29.70 |  | 2   |  | 11 |  | 131  |
| 299 | Q6DE98;CL4343Contig1                                | Gyg1-prov protein OS=Xenopus laevis GN=gyg1 PE=2 SV:          | 29.70 |  | 3   |  | 2  |  | 77   |
| 300 | TC447788 similar to UniRef100_UPI0000ECB006 Cluste  | Rep: Hepatic triacylglycerol lipase precursor (EC 3.1.1.3) (H | 29.67 |  | 1   |  | 1  |  | 3    |
| 301 | CL66Contig6                                         | CL66Contig6                                                   | 29.65 |  | 4   |  | 6  |  | 128  |
| 302 | zeinaSSns_comp385518_c1_seq2                        | len=534                                                       | 29.49 |  | 1   |  | 1  |  | 1    |
| 303 | P52171                                              | Importin subunit alpha-2 OS=Xenopus laevis GN=kpna2 PE        | 29.45 |  | 4   |  | 3  |  | 161  |
| 304 | Q6NTP3;CL8757Contig1                                | MGC83130 protein OS=Xenopus laevis GN=MGC83130 PE             | 29.11 |  | 3   |  | 2  |  | 11   |
| 305 | TC453514 homologue to UniRef100_Q6DD77 Cluster: St  | Rep: Stk39-prov protein - Xenopus laevis (African clawed fr   | 29.07 |  | 1   |  | 1  |  | 1    |
| 306 | Q7ZYR1                                              | Rpl3-prov protein OS=Xenopus laevis GN=rpl3 PE=2 SV=1         | 29.03 |  | 237 |  | 8  |  | 108  |
| 307 | zeinaSSns_comp383101_c0_seq1                        | len=1454                                                      | 28.92 |  | 15  |  | 2  |  | 12   |
| 308 | Q7ZWJ2                                              | Uqcr1 protein OS=Xenopus laevis GN=uqcr1 PE=2 SV=1            | 28.87 |  | 3   |  | 7  |  | 50   |
| 309 | Q4FZM5;CL2718Contig3                                | MGC116545 protein OS=Xenopus laevis GN=cyc1 PE=2 S            | 28.80 |  | 2   |  | 5  |  | 44   |
| 310 | Q5BJ43;CL26281Contig1                               | LOC496181 protein OS=Xenopus laevis GN=LOC496181 F            | 28.57 |  | 2   |  | 1  |  | 89   |
| 311 | CL1011Contig3                                       | CL1011Contig3                                                 | 28.45 |  | 4   |  | 14 |  | 89   |
| 312 | CL3941Contig2                                       | CL3941Contig2                                                 | 28.43 |  | 3   |  | 13 |  | 151  |
| 313 | Q6GQ21;CL1684Contig2                                | Peptidyl-prolyl cis-trans isomerase OS=Xenopus laevis GN:     | 28.37 |  | 4   |  | 2  |  | 63   |
| 314 | Q7ZTL5;CL1515Contig2                                | Cct8-prov protein OS=Xenopus laevis GN=cct8 PE=2 SV=1         | 28.21 |  | 257 |  | 10 |  | 193  |
| 315 | TC442984 similar to UniRef100_Q5HZQ5 Cluster: LOC4  | Rep: LOC496332 protein - Xenopus laevis (African clawed i     | 28.06 |  | 1   |  | 1  |  | 1    |
| 316 | Q6GQ91;dsrrswapns_comp209386_c2_seq3                | MGC80253 protein OS=Xenopus laevis GN=ndufa4 PE=4 S           | 28.05 |  | 2   |  | 3  |  | 34   |
| 317 | Q6PI79;zeinaSSns_comp370372_c0_seq2                 | Histone H3.3 OS=Xenopus laevis PE=1 SV=3 - [H33_XENI          | 27.94 |  | 21  |  | 2  |  | 17   |
| 318 | Q6NRW7;CL3725Contig3                                | MGC81186 protein OS=Xenopus laevis GN=clns1a PE=2 S           | 27.92 |  | 3   |  | 2  |  | 17   |
| 319 | Q4K198                                              | MGC116533 protein OS=Xenopus laevis GN=stoml2 PE=2            | 27.83 |  | 5   |  | 2  |  | 2    |
| 320 | Q91375                                              | Elongation factor 1-gamma-B OS=Xenopus laevis GN=eef1         | 27.69 |  | 4   |  | 3  |  | 257  |
| 321 | Q6GP41;CX133515 UniRef100_Q6GP41 Cluster: MGC8      | MGC80700 protein OS=Xenopus laevis GN=MGC80700 PE             | 27.50 |  | 4   |  | 3  |  | 39   |
| 322 | Q6GPU5                                              | MGC82602 protein OS=Xenopus laevis GN=MGC82602 PE             | 27.46 |  | 3   |  | 1  |  | 114  |
| 323 | Q7ZTP0;CL1Contig193                                 | MGC53359 protein OS=Xenopus laevis GN=tuba3c PE=2 S           | 27.33 |  | 4   |  | 0  |  | 402  |
| 324 | CL4288Contig3                                       | CL4288Contig3                                                 | 27.27 |  | 3   |  | 5  |  | 102  |
| 325 | Q66J53;CL2807Contig1                                | MGC81873 protein OS=Xenopus laevis GN=MGC81873 PE             | 27.25 |  | 5   |  | 6  |  | 710  |
| 326 | Q5XHJ8;CL2211Contig2                                | LOC397895 protein OS=Xenopus laevis GN=gsn PE=2 SV:           | 27.02 |  | 293 |  | 5  |  | 105  |
| 327 | EB474857 similar to UniRef100_UPI000069F3E7 Cluster | Rep: Long palate, lung and nasal epithelium carcinoma-ass     | 26.85 |  | 1   |  | 1  |  | 1    |
| 328 | Q3KPN6                                              | Proteasome subunit alpha type OS=Xenopus laevis GN=M          | 26.82 |  | 4   |  | 4  |  | 23   |
| 329 | TC443725 homologue to UniRef100_Q6DJF7 Cluster: 60  | Rep: 60S ribosomal protein L6 - Xenopus laevis (African cl    | 26.77 |  | 3   |  | 4  |  | 35   |
| 330 | Q6PI76;CL289Contig7                                 | Rps14-prov protein OS=Xenopus laevis GN=rps14 PE=2 S          | 26.49 |  | 4   |  | 5  |  | 347  |
| 331 | Q6PHL5;TC440338 UniRef100_Q28FP8 Cluster: 60S rib   | 60S ribosomal protein L27 OS=Xenopus laevis GN=rpl27 P        | 26.47 |  | 3   |  | 4  |  | 172  |
| 332 | Q7ZWZ7;CL2318Contig1                                | Ribosomal protein L15 OS=Xenopus laevis GN=rpl15 PE=2         | 26.47 |  | 4   |  | 6  |  | 183  |
| 333 | Q2VPL8                                              | MGC131189 protein OS=Xenopus laevis GN=aldh6a1 PE=            | 26.39 |  | 10  |  | 6  |  | 98   |
| 334 | CL4552Contig3                                       | CL4552Contig3                                                 | 26.37 |  | 4   |  | 2  |  | 105  |
| 335 | Q6PAV9;CL20295Contig1                               | MGC68699 protein OS=Xenopus laevis GN=MGC68699 PE             | 26.29 |  | 230 |  | 1  |  | 189  |

|     |                                                        |                                                              |       |  |     |  |   |  |     |
|-----|--------------------------------------------------------|--------------------------------------------------------------|-------|--|-----|--|---|--|-----|
| 336 | Q4QR45;CL3635Contig1                                   | Importin subunit alpha OS=Xenopus laevis GN=kpna7 PE=        | 26.25 |  | 3   |  | 3 |  | 265 |
| 337 | Q6NUC7;CL5043Contig2                                   | Putative uncharacterized protein OS=Xenopus laevis PE=2      | 26.02 |  | 1   |  | 3 |  | 55  |
| 338 | BJ093020 weakly similar to UniRef100_Q70X36 Cluster:   | Rep: Transposase - Rana lessonae (Pool frog), partial (34%)  | 25.96 |  | 5   |  | 1 |  | 1   |
| 339 | Q7ZW58;CL1187Contig2                                   | Tagln2-prov protein OS=Xenopus laevis GN=tagln2 PE=2 S       | 25.89 |  | 4   |  | 4 |  | 26  |
| 340 | EG584025 weakly similar to UniRef100_Q800A0 Cluster:   | Rep: Cathepsin E precursor - Rana catesbeiana (Bull frog),   | 25.81 |  | 1   |  | 1 |  | 1   |
| 341 | Q7ZYU4;TC433567 UniRef100_Q7ZYU4 Cluster: Rps9-        | Rps9-prov protein OS=Xenopus laevis PE=2 SV=1 - [Q7ZY        | 25.77 |  | 3   |  | 1 |  | 35  |
| 342 | Q6GNX6;CL542Contig3                                    | MGC80804 protein OS=Xenopus laevis GN=rps9 PE=2 SV           | 25.77 |  | 5   |  | 2 |  | 33  |
| 343 | Q7SYU3;CL2410Contig2                                   | MGC64490 protein OS=Xenopus laevis GN=rps5 PE=2 SV           | 25.62 |  | 5   |  | 4 |  | 105 |
| 344 | Q6NU02;CL367Contig6                                    | LOC443739 protein OS=Xenopus laevis GN=eif4a1 PE=2 S         | 25.62 |  | 27  |  | 1 |  | 39  |
| 345 | Q6AZL6;CL367Contig5                                    | LOC444845 protein OS=Xenopus laevis GN=LOC444845 F           | 25.62 |  | 29  |  | 1 |  | 26  |
| 346 | Q7SZB7;CL391Contig4                                    | 60S ribosomal protein L18a OS=Xenopus laevis GN=rpl18a       | 25.57 |  | 3   |  | 1 |  | 185 |
| 347 | P51048                                                 | Melatonin receptor type 1A X2.0 (Fragment) OS=Xenopus l      | 25.49 |  | 1   |  | 1 |  | 2   |
| 348 | BG037251 similar to UniRef100_P07437 Cluster: Tubulin  | Rep: Tubulin beta chain - Homo sapiens (Human), partial (2   | 25.47 |  | 1   |  | 1 |  | 6   |
| 349 | P02281;TC453026 UniRef100_P02281 Cluster: Histone H    | Histone H2B 1.1 OS=Xenopus laevis PE=1 SV=2 - [H2B11         | 25.40 |  | 13  |  | 3 |  | 155 |
| 350 | Q66KW1;CL1655Contig4                                   | MGC85384 protein OS=Xenopus laevis GN=rpl29 PE=4 SV          | 25.33 |  | 3   |  | 1 |  | 2   |
| 351 | Q7SZA5;BJ091434 UniRef100_Q7SZA5 Cluster: MGC6         | MGC64312 protein OS=Xenopus laevis GN=rpl29 PE=4 SV          | 25.33 |  | 3   |  | 1 |  | 29  |
| 352 | Q7ZX44;CL2985Contig2                                   | Txndc5-prov protein OS=Xenopus laevis GN=txndc5 PE=2         | 25.31 |  | 1   |  | 4 |  | 43  |
| 353 | Q7ZYQ8                                                 | 60S ribosomal protein L18a (Fragment) OS=Xenopus laevis      | 25.28 |  | 3   |  | 1 |  | 75  |
| 354 | Q6P7J6;CL13096Contig1                                  | MGC68461 protein OS=Xenopus laevis GN=glrx PE=4 SV=          | 25.23 |  | 1   |  | 2 |  | 7   |
| 355 | CL36962Contig1                                         | CL36962Contig1                                               | 25.22 |  | 2   |  | 1 |  | 1   |
| 356 | dsrrswapns_comp208692_c0_seq2                          | len=520                                                      | 25.00 |  | 1   |  | 1 |  | 2   |
| 357 | A5D8P9                                                 | LOC100049770 protein (Fragment) OS=Xenopus laevis GN         | 25.00 |  | 1   |  | 1 |  | 1   |
| 358 | Q9PSQ7                                                 | PNIXA, EP45=NI(2+)-binding serpin (Fragments) OS=Xeno        | 24.83 |  | 2   |  | 1 |  | 158 |
| 359 | Q6DJJ1;zeinaSSns_comp386737_c5_seq20                   | MGC82151 protein OS=Xenopus laevis GN=rps25 PE=2 S'          | 24.80 |  | 5   |  | 3 |  | 31  |
| 360 | TC440065 homologue to UniRef100_Q6GPU5 Cluster: M      | Rep: MGC82602 protein - Xenopus laevis (African clawed f     | 24.68 |  | 2   |  | 1 |  | 85  |
| 361 | Q7ZY81                                                 | Nucleosome assembly protein 1-like 1-B OS=Xenopus laev       | 24.68 |  | 4   |  | 2 |  | 68  |
| 362 | P05221;CL36471Contig1                                  | Nucleoplasmin OS=Xenopus laevis PE=1 SV=1 - [NUPL_X          | 24.50 |  | 2   |  | 2 |  | 154 |
| 363 | Q6DEB3;CL2313Contig1                                   | MGC79025 protein OS=Xenopus laevis GN=phb2 PE=2 SV           | 24.25 |  | 4   |  | 7 |  | 99  |
| 364 | dsrrswapns_comp11994_c0_seq1                           | len=224                                                      | 24.24 |  | 1   |  | 1 |  | 1   |
| 365 | Q90Z58;CL11161Contig1                                  | Chisel OS=Xenopus laevis GN=smpx PE=4 SV=1 - [Q90Z5          | 24.18 |  | 1   |  | 1 |  | 3   |
| 366 | Q5XHK2;CL84Contig4                                     | 14-3-3 protein beta/alpha-A OS=Xenopus laevis GN=ywha        | 24.18 |  | 12  |  | 2 |  | 75  |
| 367 | CL2995Contig3                                          | CL2995Contig3                                                | 24.11 |  | 2   |  | 2 |  | 32  |
| 368 | CL593Contig1                                           | CL593Contig1                                                 | 23.98 |  | 9   |  | 1 |  | 51  |
| 369 | zeinaSSns_comp382833_c4_seq6                           | len=2746                                                     | 23.86 |  | 2   |  | 1 |  | 1   |
| 370 | Q7SYT0;CL12198Contig1                                  | Elongation factor 1-alpha OS=Xenopus laevis GN=eef1a2 F      | 23.76 |  | 329 |  | 1 |  | 621 |
| 371 | dsrrswapns_comp207775_c3_seq1                          | len=557                                                      | 23.75 |  | 1   |  | 1 |  | 1   |
| 372 | TC414340 UniRef100_Q6GQ22 Cluster: Kidney mitochon     | Rep: Kidney mitochondrial carrier protein 1 - Xenopus laevis | 23.71 |  | 3   |  | 1 |  | 3   |
| 373 | CL1686Contig3                                          | CL1686Contig3                                                | 23.69 |  | 3   |  | 2 |  | 6   |
| 374 | Q6DFL2;CL4663Contig1                                   | Biorientation of chromosomes in cell division protein 1 OS=  | 23.67 |  | 1   |  | 1 |  | 4   |
| 375 | Q8AVV6                                                 | SOSS complex subunit C OS=Xenopus laevis GN=inip PE=         | 23.64 |  | 1   |  | 1 |  | 1   |
| 376 | Q7SZ26;CL2319Contig2                                   | Peptidyl-prolyl cis-trans isomerase OS=Xenopus laevis GN=    | 23.61 |  | 7   |  | 4 |  | 51  |
| 377 | Q7ZX92;CL5540Contig2                                   | MGC80929 protein OS=Xenopus laevis GN=psmd14 PE=2            | 23.55 |  | 1   |  | 3 |  | 48  |
| 378 | O57468;CL1665Contig1                                   | 14-3-3 protein epsilon OS=Xenopus laevis GN=ywhae PE=        | 23.53 |  | 5   |  | 3 |  | 64  |
| 379 | CL27618Contig1                                         | CL27618Contig1                                               | 23.43 |  | 1   |  | 1 |  | 1   |
| 380 | CL369Contig2                                           | CL369Contig2                                                 | 23.40 |  | 2   |  | 1 |  | 5   |
| 381 | DC027108 homologue to UniRef100_Q5M7C7 Cluster: P      | Rep: Protein jagunal homolog 1 - Xenopus laevis (African ci  | 23.31 |  | 1   |  | 1 |  | 3   |
| 382 | P49393;CL1Contig728                                    | 40S ribosomal protein S13 OS=Xenopus laevis GN=rps13 f       | 23.18 |  | 7   |  | 4 |  | 67  |
| 383 | TC430865 similar to UniRef100_UPI0000501EBE Cluste     | Rep: mitochondrial tumor suppressor 1 - Rattus norvegicus,   | 23.12 |  | 1   |  | 1 |  | 1   |
| 384 | TC457286 similar to UniRef100_P18709 Cluster: Vitello  | Rep: Vitellogenin-A2 precursor (VTG A2) [Contains: Lipovite  | 22.78 |  | 1   |  | 5 |  | 370 |
| 385 | Q3KPV9;CL5420Contig1                                   | Proteasome subunit beta type OS=Xenopus laevis GN=LO         | 22.75 |  | 5   |  | 5 |  | 23  |
| 386 | CL1Contig1594                                          | CL1Contig1594                                                | 22.71 |  | 3   |  | 1 |  | 2   |
| 387 | Q6NU46;CL5600Contig2                                   | Acetyl-CoA acetyltransferase A, mitochondrial OS=Xenopus     | 22.62 |  | 3   |  | 1 |  | 147 |
| 388 | dsrrswapns_comp194741_c2_seq1                          | len=959                                                      | 22.60 |  | 1   |  | 1 |  | 1   |
| 389 | dsrrswapns_comp207966_c0_seq3                          | len=2269                                                     | 22.59 |  | 1   |  | 8 |  | 46  |
| 390 | Q8AVD0                                                 | MGC53232 protein OS=Xenopus laevis PE=2 SV=1 - [Q8A          | 22.54 |  | 1   |  | 1 |  | 1   |
| 391 | CL1Contig225                                           | CL1Contig225                                                 | 22.20 |  | 3   |  | 0 |  | 156 |
| 392 | P79931                                                 | Pyruvate dehydrogenase E1-beta subunit (Fragment) OS=)       | 22.01 |  | 11  |  | 7 |  | 59  |
| 393 | CA789974 similar to UniRef100_A1A5F6 Cluster: LOC10    | Rep: LOC100036684 protein - Xenopus tropicalis (Western      | 22.00 |  | 1   |  | 1 |  | 2   |
| 394 | Q5EAV5;CL3725Contig2                                   | ICLN protein OS=Xenopus laevis GN=ICLN PE=2 SV=1 - [C        | 21.92 |  | 4   |  | 1 |  | 16  |
| 395 | CL2691Contig4                                          | CL2691Contig4                                                | 21.86 |  | 2   |  | 3 |  | 13  |
| 396 | Q7SZ19                                                 | Annexin (Fragment) OS=Xenopus laevis GN=LOC398472 F          | 21.70 |  | 7   |  | 4 |  | 38  |
| 397 | Q6PCE5;CL6542Contig1                                   | Succinyl-CoA:3-ketoacid-coenzyme A transferase OS=Xen        | 21.70 |  | 3   |  | 6 |  | 75  |
| 398 | Q7SYX2;CL10546Contig1                                  | MGC64421 protein OS=Xenopus laevis GN=serpinb6 PE=2          | 21.64 |  | 228 |  | 4 |  | 51  |
| 399 | dsrrswapns_comp213847_c0_seq3                          | len=565                                                      | 21.55 |  | 1   |  | 1 |  | 1   |
| 400 | EG574474 similar to UniRef100_A8IIQ2 Cluster: Mitochon | Rep: Mitochondrial substrate carrier - Chlamydomonas reinl   | 21.43 |  | 1   |  | 1 |  | 1   |
| 401 | Q6PAB5;CL3453Contig3                                   | MGC68609 protein OS=Xenopus laevis GN=akr1b1 PE=2 S          | 21.38 |  | 5   |  | 4 |  | 27  |
| 402 | Q5XGW7                                                 | Cbp/p300-interacting transactivator 2 OS=Xenopus laevis C    | 21.33 |  | 1   |  | 1 |  | 1   |
| 403 | Q7ZYS1;CL555Contig6                                    | 60S ribosomal protein L19 OS=Xenopus laevis GN=rpl19 P       | 21.32 |  | 3   |  | 3 |  | 266 |
| 404 | Q6NUB6;dsrrswapns_comp210970_c0_seq2                   | MGC81083 protein OS=Xenopus laevis GN=nme4 PE=2 S'           | 21.31 |  | 1   |  | 1 |  | 2   |
| 405 | TC432016 weakly similar to UniRef100_Q7RCA4 Cluster:   | Rep: Centrin - Plasmodium yoelii yoelii, partial (34%)       | 21.30 |  | 1   |  | 1 |  | 1   |
| 406 | CL3748Contig3                                          | CL3748Contig3                                                | 21.30 |  | 2   |  | 3 |  | 30  |
| 407 | Q5XHE2;CL15613Contig1                                  | LOC495025 protein OS=Xenopus laevis GN=uchl3 PE=2 S          | 21.30 |  | 2   |  | 3 |  | 24  |
| 408 | CL3167Contig3                                          | CL3167Contig3                                                | 21.24 |  | 1   |  | 1 |  | 1   |
| 409 | Q7ZY48                                                 | Rpl13a-prov protein OS=Xenopus laevis GN=rpl13a PE=2 S       | 21.21 |  | 8   |  | 6 |  | 48  |
| 410 | Q9ZM1                                                  | Cytochrome c oxidase subunit 2 (Fragment) OS=Xenopus l       | 21.20 |  | 3   |  | 3 |  | 144 |
| 411 | Q6GN02                                                 | Acetyl-CoA acetyltransferase B, mitochondrial OS=Xenopus     | 21.19 |  | 4   |  | 1 |  | 138 |
| 412 | Q7ZYE8;CL6531Contig1                                   | Tyrp1-prov protein OS=Xenopus laevis GN=tyrp1 PE=2 SV        | 21.16 |  | 3   |  | 5 |  | 77  |
| 413 | dsrrswapns_comp216523_c0_seq5                          | len=512                                                      | 21.14 |  | 1   |  | 1 |  | 1   |
| 414 | CL14169Contig1                                         | CL14169Contig1                                               | 21.13 |  | 2   |  | 1 |  | 7   |
| 415 | CL419Contig8                                           | CL419Contig8                                                 | 21.13 |  | 1   |  | 1 |  | 1   |
| 416 | A0AUT4                                                 | LOC100036778 protein OS=Xenopus laevis GN=LOC1000:           | 21.01 |  | 6   |  | 1 |  | 136 |
| 417 | A7YYL7;CL10641Contig1                                  | LOC100126616 protein OS=Xenopus laevis GN=mrpl32 PE          | 20.99 |  | 1   |  | 1 |  | 2   |
| 418 | DC007851 similar to UniRef100_UPI00004D8D43 Cluste     | Rep: C219-reactive peptide - Xenopus tropicalis, partial (12 | 20.89 |  | 11  |  | 1 |  | 1   |
| 419 | dsrrswapns_comp199899_c1_seq1                          | len=286                                                      | 20.83 |  | 1   |  | 1 |  | 1   |
| 420 | BOLM40                                                 | Importin beta 1 OS=Xenopus laevis GN=kpnb1 PE=2 SV=1         | 20.78 |  | 8   |  | 8 |  | 90  |
| 421 | Q66KR0                                                 | LOC446923 protein (Fragment) OS=Xenopus laevis GN=L          | 20.63 |  | 2   |  | 3 |  | 18  |

|     |                                                                |                                                               |       |     |    |    |     |
|-----|----------------------------------------------------------------|---------------------------------------------------------------|-------|-----|----|----|-----|
| 422 | BI314067                                                       | BI314067                                                      | 20.59 | 1   | 1  | 1  | 2   |
| 423 | P79929;CL1Contig361                                            | LOC397932 protein OS=Xenopus laevis GN=LOC397932 F            | 20.57 | 4   | 1  | 3  | 31  |
| 424 | Q7SZA3                                                         | MGC64320 protein OS=Xenopus laevis PE=4 SV=1 - [Q7S           | 20.55 | 2   | 1  | 1  | 6   |
| 425 | Q66J16                                                         | MGC83352 protein OS=Xenopus laevis GN=aldh7a1 PE=2            | 20.55 | 3   | 5  | 5  | 23  |
| 426 | Q91624;CL52Contig10                                            | Heat shock cognate 70.I OS=Xenopus laevis GN=hsc70.I F        | 20.47 | 3   | 1  | 8  | 306 |
| 427 | Q9IAJ7;CL4522Contig2                                           | ATP synthase subunit B OS=Xenopus laevis GN=atp5f1 PE         | 20.40 | 3   | 4  | 4  | 47  |
| 428 | Q3KQC0;CL5489Contig2                                           | LOC414601 protein OS=Xenopus laevis GN=LOC414601 F            | 20.38 | 4   | 3  | 4  | 277 |
| 429 | DC024875 homologue to UniRef100_P04751 Cluster: Ac             | Rep: Actin, alpha cardiac muscle 1 - Xenopus laevis (Africa   | 20.34 | 4   | 3  | 13 | 485 |
| 430 | Q6GPQ9;CL12997Contig1                                          | MGC82679 protein OS=Xenopus laevis GN=nduf56 PE=2 S           | 20.30 | 3   | 2  | 2  | 40  |
| 431 | Q5FWM7;CL10311Contig1                                          | MGC84940 protein OS=Xenopus laevis GN=fabp4 PE=2 S            | 20.30 | 1   | 1  | 2  | 15  |
| 432 | B7ZR28                                                         | N1/N2 protein OS=Xenopus laevis GN=N1/N2 PE=2 SV=1            | 20.27 | 13  | 5  | 6  | 135 |
| 433 | CL1561Contig1                                                  | CL1561Contig1                                                 | 20.22 | 1   | 1  | 1  | 2   |
| 434 | Q6GPW4                                                         | Transmembrane protein 205 OS=Xenopus laevis GN=tmen           | 20.21 | 1   | 1  | 1  | 1   |
| 435 | Q6PAY8;CL13107Contig1                                          | Hydroxysteroid dehydrogenase-like protein 2 OS=Xenopus        | 20.14 | 1   | 5  | 5  | 239 |
| 436 | dsrrswaps_comp209340_c0_seq1                                   | len=500                                                       | 20.13 | 1   | 1  | 1  | 1   |
| 437 | dsrrswaps_comp216004_c2_seq2                                   | len=1698                                                      | 20.11 | 4   | 1  | 6  | 35  |
| 438 | Q6DCJ9                                                         | Gdi2-prov protein OS=Xenopus laevis GN=gdi1 PE=2 SV=1         | 19.96 | 8   | 5  | 5  | 13  |
| 439 | Q68A89                                                         | Proteasome subunit alpha type (Fragment) OS=Xenopus la        | 19.92 | 2   | 3  | 3  | 3   |
| 440 | B7ZR89                                                         | Paraxial-like protein OS=Xenopus laevis GN=LOC493747 P        | 19.89 | 228 | 1  | 2  | 2   |
| 441 | Q5PPR7;CL22579Contig1                                          | LOC496102 protein OS=Xenopus laevis GN=LOC496102 F            | 19.83 | 1   | 1  | 1  | 4   |
| 442 | DC047969 homologue to UniRef100_Q5PQ84 Cluster: N              | Rep: Nucleoside diphosphate kinase - Xenopus laevis (Afric    | 19.77 | 4   | 1  | 1  | 1   |
| 443 | Q6DCS9                                                         | MGC80838 protein OS=Xenopus laevis GN=ptgr1.2 PE=2 S          | 19.76 | 3   | 4  | 4  | 26  |
| 444 | CL2090Contig1                                                  | CL2090Contig1                                                 | 19.69 | 4   | 6  | 9  | 84  |
| 445 | Q5M7C7;dsrrswaps_comp210647_c3_seq3                            | Protein jagunal homolog 1 OS=Xenopus laevis GN=jagn1 F        | 19.67 | 3   | 1  | 1  | 2   |
| 446 | Q68F32;CL3294Contig2                                           | MGC81977 protein OS=Xenopus laevis GN=arhgd4 PE=2             | 19.60 | 4   | 2  | 2  | 12  |
| 447 | Q566H3;CL12776Contig1                                          | MGC114733 protein OS=Xenopus laevis GN=cebpg PE=2             | 19.58 | 1   | 1  | 1  | 4   |
| 448 | Q640F4;CL20343Contig1                                          | LOC494684 protein OS=Xenopus laevis GN=LOC494684 F            | 19.52 | 1   | 1  | 1  | 6   |
| 449 | Q6IND5                                                         | MGC83495 protein OS=Xenopus laevis GN=vwa5a.2 PE=2            | 19.51 | 3   | 1  | 8  | 135 |
| 450 | Q6NRB2                                                         | MGC84587 protein OS=Xenopus laevis GN=hibadh PE=2 S           | 19.51 | 3   | 3  | 3  | 24  |
| 451 | P13549;CL5Contig29                                             | Elongation factor 1-alpha, somatic form OS=Xenopus laevis     | 19.48 | 45  | 1  | 9  | 871 |
| 452 | TC429806 homologue to UniRef100_UPI000069FFAE Cluster: Whirlin | Rep: Whirlin (Autosomal recessive deafness type 31 protei     | 19.44 | 2   | 1  | 1  | 1   |
| 453 | CL13435Contig1                                                 | CL13435Contig1                                                | 19.41 | 1   | 1  | 1  | 1   |
| 454 | CL9216Contig2                                                  | CL9216Contig2                                                 | 19.40 | 4   | 7  | 7  | 31  |
| 455 | TC429806 homologue to UniRef100_Q0V9B4 Cluster: G              | Rep: Gem protein - Xenopus tropicalis (Western clawed fro     | 19.40 | 1   | 1  | 1  | 1   |
| 456 | A2VDA2;CL2004Contig2                                           | LOC100037199 protein OS=Xenopus laevis GN=sri PE=2 S          | 19.39 | 4   | 2  | 3  | 7   |
| 457 | dsrrswaps_comp116804_c0_seq1                                   | len=382                                                       | 19.33 | 1   | 1  | 1  | 1   |
| 458 | Q6DE12;CL5192Contig1                                           | M6prbp1-prov protein OS=Xenopus laevis GN=m6prbp1-pr          | 19.29 | 3   | 2  | 3  | 19  |
| 459 | CL990Contig2                                                   | CL990Contig2                                                  | 19.28 | 5   | 5  | 5  | 26  |
| 460 | CL4908Contig3                                                  | CL4908Contig3                                                 | 19.25 | 4   | 1  | 4  | 13  |
| 461 | A1L3J7                                                         | LOC100037025 protein OS=Xenopus laevis GN=ganab PE            | 19.19 | 7   | 8  | 8  | 21  |
| 462 | Q6AZL7                                                         | MGC86356 protein OS=Xenopus laevis GN=rps26 PE=4 S            | 19.13 | 7   | 2  | 2  | 52  |
| 463 | Q6PA58                                                         | Succinate dehydrogenase [ubiquinone] flavoprotein subunit     | 18.95 | 3   | 3  | 5  | 70  |
| 464 | CL5360Contig2                                                  | CL5360Contig2                                                 | 18.93 | 4   | 1  | 8  | 108 |
| 465 | Q6NTR4;CL6643Contig1                                           | MGC83076 protein OS=Xenopus laevis GN=rpl14 PE=2 SV           | 18.84 | 3   | 2  | 2  | 44  |
| 466 | Q8AVD7;CL3574Contig1                                           | Ndufv1 protein OS=Xenopus laevis GN=ndufv1 PE=2 SV=1          | 18.68 | 1   | 4  | 4  | 19  |
| 467 | A9UM19;CL14087Contig1                                          | LOC100137677 protein OS=Xenopus laevis GN=LOC1001             | 18.67 | 1   | 1  | 2  | 17  |
| 468 | Q66KV2                                                         | MGC85404 protein OS=Xenopus laevis GN=rpl38 PE=3 SV           | 18.57 | 2   | 1  | 1  | 28  |
| 469 | TC453299 homologue to UniRef100_UPI000069DD4D C                | Rep: Seizure 6-like protein precursor. - Xenopus tropicalis,  | 18.57 | 3   | 1  | 1  | 1   |
| 470 | CL19436Contig1                                                 | CL19436Contig1                                                | 18.50 | 1   | 1  | 1  | 1   |
| 471 | Q9DE56                                                         | Ribonucleoside-diphosphate reductase (Fragment) OS=Xer        | 18.46 | 1   | 2  | 5  | 70  |
| 472 | dsrrswaps_comp216030_c0_seq4                                   | len=1289                                                      | 18.45 | 6   | 1  | 1  | 1   |
| 473 | Q6NUH0;CL2830Contig1                                           | 60S ribosomal protein L31 OS=Xenopus laevis GN=rpl31 P        | 18.40 | 3   | 2  | 2  | 6   |
| 474 | DR728022 homologue to UniRef100_Q5HZ68 Cluster: G              | Rep: Guanidinoacetate N-methyltransferase B - Xenopus la      | 18.39 | 4   | 1  | 1  | 2   |
| 475 | Q90X16;CL10849Contig1                                          | Annexin OS=Xenopus laevis GN=anxa4 PE=2 SV=1 - [Q90           | 18.38 | 1   | 3  | 3  | 7   |
| 476 | Q52M98                                                         | 14-3-3 protein theta OS=Xenopus laevis GN=ywhaq PE=2 S        | 18.37 | 10  | 1  | 3  | 40  |
| 477 | CB200344 homologue to UniRef100_UPI00006A0D20 Cl               | Rep: Thyroglobulin precursor. - Xenopus tropicalis, partial ( | 18.25 | 1   | 1  | 1  | 1   |
| 478 | P15126                                                         | 60S ribosomal protein L5-B OS=Xenopus laevis GN=rpl5-b        | 18.24 | 3   | 1  | 3  | 19  |
| 479 | CL42352Contig1                                                 | CL42352Contig1                                                | 18.18 | 2   | 1  | 1  | 1   |
| 480 | dsrrswaps_comp216320_c1_seq1                                   | len=333                                                       | 18.18 | 1   | 1  | 1  | 3   |
| 481 | CL30676Contig1                                                 | CL30676Contig1                                                | 18.07 | 1   | 1  | 1  | 1   |
| 482 | dsrrswaps_comp209417_c0_seq3                                   | len=2504                                                      | 18.07 | 1   | 1  | 1  | 1   |
| 483 | EB475574 weakly similar to UniRef100_Q7ZTJ1 Cluster: S         | Rep: AGAP003346-PA - Anopheles gambiae str. PEST, pai         | 18.04 | 1   | 1  | 1  | 1   |
| 484 | Q4FZP3                                                         | Cytochrome c oxidase subunit 6A, mitochondrial OS=Xeno        | 18.02 | 5   | 1  | 1  | 45  |
| 485 | Q66KP4                                                         | MGC85561 protein OS=Xenopus laevis GN=uros PE=2 SV            | 17.94 | 1   | 1  | 1  | 1   |
| 486 | A4UXD6                                                         | Toll-like receptor8 (Fragment) OS=Xenopus laevis GN=tlr8      | 17.92 | 1   | 1  | 1  | 1   |
| 487 | zeinaSSns_comp378203_c0_seq1                                   | len=201                                                       | 17.86 | 5   | 1  | 1  | 1   |
| 488 | CL2211Contig3                                                  | CL2211Contig3                                                 | 17.83 | 4   | 3  | 6  | 21  |
| 489 | CB562068 weakly similar to UniRef100_P08941 Cluster:           | Rep: Proto-oncogene tyrosine-protein kinase ROS precurs       | 17.81 | 1   | 1  | 1  | 1   |
| 490 | dsrrswaps_comp26597_c0_seq1                                    | len=233                                                       | 17.74 | 1   | 1  | 1  | 2   |
| 491 | Q6DCM8                                                         | Hadh2-prov protein OS=Xenopus laevis GN=hsd17b10 PE=          | 17.69 | 3   | 2  | 2  | 9   |
| 492 | TC439428 homologue to UniRef100_Q7ZTJ1 Cluster: S              | Rep: Slc25a3-prov protein - Xenopus laevis (African clawed    | 17.67 | 6   | 1  | 3  | 6   |
| 493 | Q6JJA20;CL4546Contig2                                          | 38k protein OS=Xenopus laevis PE=2 SV=1 - [Q6JJA20_XE         | 17.65 | 5   | 2  | 2  | 16  |
| 494 | Q7ZXF3;zeinaSSns_comp386232_c2_seq1                            | DNA-binding protein inhibitor ID-4 OS=Xenopus laevis GN=      | 17.56 | 2   | 1  | 1  | 2   |
| 495 | Q66IP6;CL2553Contig2                                           | MGC86305 protein OS=Xenopus laevis GN=fam168a PE=2            | 17.45 | 1   | 1  | 1  | 2   |
| 496 | CL3Contig34                                                    | CL3Contig34                                                   | 17.43 | 24  | 3  | 3  | 5   |
| 497 | CL13990Contig1                                                 | CL13990Contig1                                                | 17.36 | 1   | 1  | 1  | 2   |
| 498 | CL2985Contig3                                                  | CL2985Contig3                                                 | 17.33 | 2   | 3  | 5  | 18  |
| 499 | Q71U00                                                         | S-phase kinase-associated protein 1 OS=Xenopus laevis G       | 17.18 | 1   | 1  | 1  | 1   |
| 500 | CL21961Contig1                                                 | CL21961Contig1                                                | 17.17 | 1   | 1  | 1  | 2   |
| 501 | zeinaSSns_comp377647_c3_seq1                                   | len=449                                                       | 17.14 | 1   | 1  | 1  | 1   |
| 502 | Q63ZG6;CL22Contig15                                            | Phosphorylase OS=Xenopus laevis GN=pygl PE=2 SV=1 -           | 16.96 | 9   | 10 | 10 | 251 |
| 503 | Q6GN18;CL4245Contig2                                           | MGC82778 protein OS=Xenopus laevis GN=MGC82778 PE             | 16.93 | 1   | 1  | 1  | 6   |
| 504 | Q4KLB0                                                         | Glyoxalase domain-containing protein 5 OS=Xenopus laevi       | 16.88 | 2   | 1  | 1  | 2   |
| 505 | Q5U556;CL13826Contig1                                          | LOC495364 protein OS=Xenopus laevis GN=mrp12 PE=2             | 16.84 | 1   | 3  | 3  | 44  |
| 506 | Q7ZX34;CL3654Contig2                                           | MGC52616 protein OS=Xenopus laevis GN=hspa9 PE=2 S            | 16.72 | 3   | 7  | 7  | 32  |
| 507 | NP9453667 GB                                                   | AY819241.1 AAX37552.1 c-myc                                   | 16.67 | 1   | 1  | 1  | 24  |



|     |                                                       |                                                              |       |    |   |   |    |
|-----|-------------------------------------------------------|--------------------------------------------------------------|-------|----|---|---|----|
| 508 | Q3SYN2;CL2881Contig3                                  | MGC114703 protein OS=Xenopus laevis GN=mob3a PE=2            | 16.67 | 1  | 1 | 1 | 2  |
| 509 | Q641G7                                                | Actin-related protein 2/3 complex subunit 4 OS=Xenopus la    | 16.67 | 1  | 1 | 1 | 1  |
| 510 | Q4U0Y4                                                | Nucleosome assembly protein 1-like 1-A OS=Xenopus laev       | 16.58 | 5  | 1 | 5 | 63 |
| 511 | Q6DJQ0                                                | Putative uncharacterized protein OS=Xenopus laevis PE=2      | 16.55 | 4  | 3 | 3 | 17 |
| 512 | P28024                                                | Proteasome subunit beta type-4 (Fragment) OS=Xenopus la      | 16.53 | 4  | 1 | 2 | 9  |
| 513 | Q5M7D5;CL6336Contig3                                  | LOC496233 protein OS=Xenopus laevis GN=ndufs3 PE=2           | 16.40 | 4  | 3 | 3 | 66 |
| 514 | Q6GPC4;CL12623Contig1                                 | MGC80505 protein OS=Xenopus laevis GN=ndufb7 PE=4            | 16.38 | 1  | 1 | 1 | 12 |
| 515 | Q6AZI4                                                | LOC446231 protein (Fragment) OS=Xenopus laevis GN=ut         | 16.34 | 3  | 1 | 1 | 2  |
| 516 | Q6DJP1                                                | LOC443721 protein (Fragment) OS=Xenopus laevis GN=ct         | 16.33 | 7  | 4 | 4 | 97 |
| 517 | BG017237 similar to UniRef100_Q6DJF7 Cluster: 60S rib | Rep: 60S ribosomal protein L6 - Xenopus laevis (African cla  | 16.33 | 1  | 1 | 1 | 4  |
| 518 | P62840                                                | Ubiquitin-conjugating enzyme E2 D2 OS=Xenopus laevis G       | 16.33 | 2  | 1 | 1 | 2  |
| 519 | TC428798 homologue to UniRef100_Q6GPT4 Cluster: M     | Rep: MGC82630 protein - Xenopus laevis (African clawed f     | 16.31 | 3  | 1 | 1 | 2  |
| 520 | CL5962Contig1                                         | CL5962Contig1                                                | 16.27 | 2  | 5 | 5 | 28 |
| 521 | Q6PAD3;CL1008Contig1                                  | Psmc4 protein OS=Xenopus laevis GN=psmc4 PE=2 SV=1           | 16.19 | 2  | 2 | 2 | 6  |
| 522 | P79951                                                | CD3gamma/delta OS=Xenopus laevis GN=cd3g PE=2 SV=            | 16.17 | 2  | 2 | 2 | 3  |
| 523 | CL38748Contig1                                        | CL38748Contig1                                               | 16.15 | 2  | 1 | 1 | 1  |
| 524 | dsrrswapns_comp199260_c1_seq1                         | len=303                                                      | 16.13 | 1  | 1 | 1 | 2  |
| 525 | Q6PA24                                                | MGC68726 protein OS=Xenopus laevis GN=capza1 PE=2            | 16.13 | 1  | 1 | 1 | 2  |
| 526 | CL9522Contig1                                         | CL9522Contig1                                                | 16.11 | 1  | 3 | 3 | 19 |
| 527 | CL11897Contig1                                        | CL11897Contig1                                               | 16.10 | 1  | 4 | 4 | 19 |
| 528 | Q7SX80                                                | MGC64330 protein OS=Xenopus laevis GN=ctbs PE=2 SV=          | 15.95 | 4  | 4 | 4 | 31 |
| 529 | Q7ZX29;CL3649Contig1                                  | Dia1 protein OS=Xenopus laevis GN=cyb5r3 PE=2 SV=1           | 15.95 | 1  | 3 | 3 | 15 |
| 530 | CL3728Contig4                                         | CL3728Contig4                                                | 15.79 | 1  | 1 | 1 | 1  |
| 531 | Q8AVD3;CL1995Contig2                                  | Adenylate kinase 2, mitochondrial OS=Xenopus laevis GN=      | 15.77 | 4  | 3 | 3 | 64 |
| 532 | CL14985Contig1                                        | CL14985Contig1                                               | 15.75 | 1  | 1 | 1 | 1  |
| 533 | CL15740Contig1                                        | CL15740Contig1                                               | 15.71 | 1  | 1 | 1 | 1  |
| 534 | CL45523Contig1                                        | CL45523Contig1                                               | 15.70 | 1  | 1 | 1 | 1  |
| 535 | Q6VEU9;CL6200Contig1                                  | H+ transporting F1 ATP synthase epsilon subunit OS=Xenc      | 15.69 | 3  | 1 | 1 | 12 |
| 536 | BJ630382 homologue to UniRef100_Q6Y211 Cluster: S6    | Rep: S6 ribosomal protein - Pagrus major (Red sea bream)     | 15.63 | 1  | 2 | 2 | 61 |
| 537 | CL1377Contig4                                         | CL1377Contig4                                                | 15.57 | 4  | 5 | 6 | 91 |
| 538 | CL38685Contig1                                        | CL38685Contig1                                               | 15.55 | 2  | 1 | 1 | 2  |
| 539 | Q4QR44                                                | MGC114789 protein OS=Xenopus laevis GN=rps15a PE=2           | 15.38 | 2  | 1 | 1 | 3  |
| 540 | CL16992Contig1                                        | CL16992Contig1                                               | 15.38 | 1  | 1 | 1 | 1  |
| 541 | Q641B9                                                | Actin-related protein 2/3 complex subunit 5 OS=Xenopus la    | 15.33 | 2  | 1 | 1 | 2  |
| 542 | Q8AVR6                                                | Hspc177-prov protein OS=Xenopus laevis GN=chmp5 PE=          | 15.25 | 2  | 1 | 1 | 1  |
| 543 | dsrrswapns_comp119549_c0_seq1                         | len=256                                                      | 15.19 | 1  | 1 | 1 | 1  |
| 544 | dsrrswapns_comp217115_c6_seq8                         | len=796                                                      | 15.15 | 2  | 1 | 1 | 1  |
| 545 | Q5XHE4                                                | LOC495023 protein OS=Xenopus laevis GN=paqr4 PE=2 S          | 15.07 | 1  | 1 | 1 | 1  |
| 546 | CL1614Contig1                                         | CL1614Contig1                                                | 15.00 | 5  | 2 | 2 | 11 |
| 547 | EB473635 homologue to UniRef100_Q09TP6 Cluster: He    | Rep: Heat shock protein 70 - Sphaeroforma arctica, partial   | 15.00 | 1  | 1 | 1 | 3  |
| 548 | dsrrswapns_comp193683_c1_seq1                         | len=349                                                      | 14.95 | 1  | 1 | 1 | 2  |
| 549 | dsrrswapns_comp212436_c4_seq1                         | len=421                                                      | 14.91 | 2  | 1 | 1 | 1  |
| 550 | Q7SY98                                                | MGC64309 protein OS=Xenopus laevis PE=2 SV=1 - [Q7S          | 14.85 | 4  | 1 | 6 | 64 |
| 551 | Q5U583;CL2706Contig1                                  | Probable glutathione peroxidase 8-B OS=Xenopus laevis G      | 14.83 | 5  | 1 | 1 | 3  |
| 552 | Q640H4                                                | LOC494673 protein OS=Xenopus laevis GN=cth PE=2 SV=          | 14.82 | 1  | 1 | 2 | 2  |
| 553 | A8E5Y6;CL7871Contig1                                  | LOC100126622 protein OS=Xenopus laevis GN=ninj1 PE=          | 14.79 | 2  | 1 | 1 | 4  |
| 554 | D2WK21                                                | Sex-determining region Y-box 2 OS=Xenopus laevis PE=2        | 14.79 | 2  | 1 | 1 | 1  |
| 555 | CL23927Contig1                                        | CL23927Contig1                                               | 14.77 | 1  | 1 | 1 | 1  |
| 556 | G3GBS4                                                | Peroxioredoxin 3 OS=Xenopus laevis GN=PRDX3 PE=2 SV=         | 14.74 | 4  | 1 | 7 | 19 |
| 557 | CL44634Contig1                                        | CL44634Contig1                                               | 14.71 | 1  | 1 | 1 | 1  |
| 558 | Q7ZYL1;CL5426Contig2                                  | Proteasome subunit beta type OS=Xenopus laevis GN=psn        | 14.64 | 2  | 2 | 2 | 11 |
| 559 | A2VD97                                                | LOC100037195 protein OS=Xenopus laevis GN=mccc2 PE           | 14.59 | 3  | 3 | 3 | 20 |
| 560 | Q7TOY7;CL7862Contig1                                  | 2o545 protein OS=Xenopus laevis GN=ccd25 PE=2 SV=1           | 14.56 | 3  | 2 | 2 | 10 |
| 561 | CL1501Contig1                                         | CL1501Contig1                                                | 14.53 | 2  | 1 | 1 | 1  |
| 562 | DC014590 similar to UniRef100_Q4RTC7 Cluster: Chrom   | Rep: Chromosome 1 SCAF14998, whole genome shotgun            | 14.49 | 3  | 1 | 1 | 1  |
| 563 | CB943254 homologue to UniRef100_Q52KT5 Cluster: LC    | Rep: LOC733227 protein - Xenopus laevis (African clawed      | 14.47 | 3  | 1 | 1 | 1  |
| 564 | CF270399                                              | CF270399                                                     | 14.43 | 2  | 1 | 1 | 2  |
| 565 | Q5XGQ8;CL9736Contig1                                  | LOC495164 protein OS=Xenopus laevis GN=trpg11 PE=2 S         | 14.39 | 2  | 1 | 2 | 3  |
| 566 | Q66KZ5                                                | MGC85294 protein OS=Xenopus laevis GN=MGC85294 PE            | 14.38 | 2  | 1 | 1 | 1  |
| 567 | Q6DEA5;CL11630Contig1                                 | Pex26-prov protein OS=Xenopus laevis GN=pex26 PE=2 S         | 14.37 | 1  | 1 | 1 | 45 |
| 568 | Q7T0W0;CL2874Contig1                                  | Dihydropolyl dehydrogenase OS=Xenopus laevis GN=dld f        | 14.34 | 5  | 3 | 3 | 75 |
| 569 | dsrrswapns_comp211056_c0_seq10                        | len=1398                                                     | 14.29 | 1  | 1 | 1 | 1  |
| 570 | Q6INT6                                                | MGC80342 protein OS=Xenopus laevis GN=aagab PE=2 S           | 14.24 | 1  | 1 | 1 | 1  |
| 571 | Q0IHJ5                                                | MGC154315 protein OS=Xenopus laevis GN=MGC154315             | 14.16 | 2  | 1 | 1 | 1  |
| 572 | Q6GQ45                                                | MGC80353 protein OS=Xenopus laevis GN=ndufb3 PE=4            | 14.12 | 3  | 1 | 1 | 2  |
| 573 | Q712T4                                                | Enhancer of split related 9 OS=Xenopus laevis GN=hes9.1      | 14.10 | 1  | 1 | 1 | 1  |
| 574 | dsrrswapns_comp120180_c0_seq1                         | len=262                                                      | 14.04 | 2  | 1 | 1 | 1  |
| 575 | P21574                                                | Y-box-binding protein 2-A OS=Xenopus laevis GN=ybx2-a f      | 13.99 | 23 | 3 | 3 | 61 |
| 576 | CL10115Contig1                                        | CL10115Contig1                                               | 13.94 | 1  | 1 | 1 | 2  |
| 577 | dsrrswapns_comp203196_c1_seq3                         | len=642                                                      | 13.93 | 1  | 1 | 1 | 1  |
| 578 | Q6DJK5;CL3918Contig1                                  | CNDP dipeptidase 2 (Metallopeptidase M20 family) OS=Xe       | 13.92 | 6  | 5 | 5 | 73 |
| 579 | Q6DE30                                                | Oat-prov protein OS=Xenopus laevis GN=oat.1 PE=2 SV=1        | 13.90 | 6  | 3 | 3 | 73 |
| 580 | TC460857 weakly similar to UniRef100_Q90ZY4 Cluster:  | Rep: Serine/threonine-protein kinase SBK1 - Danio rerio (Zi  | 13.89 | 1  | 1 | 1 | 1  |
| 581 | Q5XHC7                                                | LOC495037 protein OS=Xenopus laevis GN=LOC495037 F           | 13.87 | 1  | 1 | 1 | 1  |
| 582 | BJ627598 similar to UniRef100_Q28DA4 Cluster: Novel t | Rep: Novel trypsin family protein - Xenopus tropicalis (West | 13.79 | 1  | 1 | 1 | 1  |
| 583 | A9ZS93                                                | Transmembrane, prostate androgen induced RNA OS=Xen          | 13.78 | 2  | 1 | 1 | 2  |
| 584 | CL18181Contig1                                        | CL18181Contig1                                               | 13.73 | 2  | 2 | 2 | 14 |
| 585 | CL38387Contig1                                        | CL38387Contig1                                               | 13.71 | 1  | 1 | 1 | 1  |
| 586 | dsrrswapns_comp50253_c0_seq1                          | len=235                                                      | 13.64 | 1  | 1 | 1 | 1  |
| 587 | CL665Contig1                                          | CL665Contig1                                                 | 13.61 | 1  | 2 | 5 | 10 |
| 588 | Q7LZG8                                                | Creatine kinase (Fragment) OS=Xenopus laevis PE=3 SV=        | 13.58 | 9  | 1 | 3 | 31 |
| 589 | Q6DDF2                                                | Acad9-prov protein OS=Xenopus laevis GN=acad9 PE=2 S         | 13.50 | 2  | 4 | 4 | 31 |
| 590 | Q3B8B3;CL12613Contig1                                 | MGC132191 protein OS=Xenopus laevis GN=uchl1 PE=2 S          | 13.45 | 2  | 3 | 3 | 20 |
| 591 | CL11493Contig1                                        | CL11493Contig1                                               | 13.43 | 1  | 1 | 1 | 1  |
| 592 | CL33207Contig1                                        | CL33207Contig1                                               | 13.41 | 1  | 1 | 1 | 2  |
| 593 | Q3LH63                                                | Doublesex- and mab-3-related transcription factor 1A OS=     | 13.39 | 1  | 1 | 1 | 1  |

|     |                                                       |                                                               |       |     |   |   |     |
|-----|-------------------------------------------------------|---------------------------------------------------------------|-------|-----|---|---|-----|
| 594 | CL14060Contig1                                        | CL14060Contig1                                                | 13.33 | 1   | 1 | 1 | 2   |
| 595 | Q91926                                                | Homeobox protein vent1 OS=Xenopus laevis GN=vent1 PE          | 13.26 | 1   | 1 | 1 | 1   |
| 596 | zeinaSSns_comp382047_c1_seq2                          | len=854                                                       | 13.23 | 2   | 1 | 1 | 1   |
| 597 | Q8UW77;CL1026Contig6                                  | XEB1B OS=Xenopus laevis GN=mapre1 PE=2 SV=1 - [Q8U            | 13.22 | 13  | 2 | 2 | 53  |
| 598 | Q6GLN6                                                | MGC84462 protein OS=Xenopus laevis GN=MGC84462 PE             | 13.20 | 1   | 1 | 1 | 1   |
| 599 | TC450147 weakly similar to UniRef100_UPI0000ECC61     | Rep: ADP-ribosyl cyclase 2 precursor (EC 3.2.2.5) (Cyclic A   | 13.19 | 2   | 1 | 1 | 5   |
| 600 | Q6PAE3                                                | MGC68448 protein OS=Xenopus laevis GN=MGC68448 PE             | 13.17 | 4   | 2 | 8 | 100 |
| 601 | P46472;CL5541Contig2                                  | 26S protease regulatory subunit 7 OS=Xenopus laevis GN=       | 13.16 | 292 | 3 | 4 | 8   |
| 602 | Q7ZY16;CL9256Contig2                                  | Adsl-prov protein OS=Xenopus laevis GN=adsl PE=2 SV=1         | 13.12 | 3   | 3 | 3 | 58  |
| 603 | CL84Contig2                                           | CL84Contig2                                                   | 13.10 | 1   | 1 | 1 | 1   |
| 604 | O42587;CL492Contig6                                   | 26S protease regulatory subunit 6A-A OS=Xenopus laevis        | 13.09 | 6   | 2 | 2 | 4   |
| 605 | dsrrswapns_comp200563_c0_seq1                         | len=269                                                       | 13.04 | 2   | 1 | 1 | 14  |
| 606 | Q6NTX7;CL3174Contig3                                  | Kcnab2 protein OS=Xenopus laevis GN=kcnab2 PE=2 SV=           | 13.03 | 4   | 1 | 1 | 3   |
| 607 | Q66KN2                                                | MGC85584 protein OS=Xenopus laevis GN=atp5j2 PE=4 S           | 12.94 | 2   | 1 | 1 | 7   |
| 608 | Q4V7J2                                                | LOC733264 protein (Fragment) OS=Xenopus laevis GN=L           | 12.91 | 2   | 1 | 1 | 1   |
| 609 | CL46044Contig1                                        | CL46044Contig1                                                | 12.90 | 1   | 1 | 1 | 1   |
| 610 | zeinaSSns_comp381133_c0_seq2                          | len=1342                                                      | 12.86 | 1   | 1 | 1 | 1   |
| 611 | Q6DDW1                                                | MGC81675 protein OS=Xenopus laevis GN=txn1 PE=2 SV            | 12.80 | 1   | 2 | 2 | 2   |
| 612 | Q6INK1                                                | MGC82415 protein OS=Xenopus laevis GN=MGC82415 PE             | 12.76 | 2   | 4 | 4 | 18  |
| 613 | zeinaSSns_comp388513_c0_seq2                          | len=2561                                                      | 12.75 | 1   | 1 | 1 | 2   |
| 614 | A9JS79                                                | Proteasome subunit beta type (Fragment) OS=Xenopus lae        | 12.65 | 6   | 3 | 3 | 10  |
| 615 | CL26319Contig1                                        | CL26319Contig1                                                | 12.59 | 1   | 1 | 1 | 2   |
| 616 | dsrrswapns_comp216613_c0_seq1                         | len=4193                                                      | 12.57 | 3   | 7 | 8 | 66  |
| 617 | TC448972 homologue to UniRef100_Q5XHJ5 Cluster: Ar    | Rep: Arginine/serine-rich coiled-coil protein 2 - Xenopus tro | 12.57 | 1   | 1 | 1 | 1   |
| 618 | zeinaSSns_comp389334_c0_seq3                          | len=1094                                                      | 12.54 | 2   | 1 | 1 | 1   |
| 619 | Q5U4L0;CL8653Contig1                                  | LOC100101274 protein OS=Xenopus laevis GN=LOC1001             | 12.50 | 7   | 2 | 2 | 34  |
| 620 | dsrrswapns_comp215243_c1_seq12                        | len=467                                                       | 12.50 | 10  | 1 | 1 | 1   |
| 621 | Q66KN4;CL12856Contig1                                 | Mitochondrial NADH dehydrogenase ubiquinone 1 alpha su        | 12.50 | 1   | 1 | 1 | 2   |
| 622 | CL13593Contig1                                        | CL13593Contig1                                                | 12.42 | 1   | 1 | 1 | 1   |
| 623 | Q8AVB5                                                | Sfrs1 protein (Fragment) OS=Xenopus laevis GN=Sfrs1 PE        | 12.37 | 3   | 1 | 1 | 3   |
| 624 | Q5M781;CL1453Contig4                                  | Dynein light chain dlc8b OS=Xenopus laevis GN=dylnl2 PE       | 12.36 | 3   | 1 | 1 | 13  |
| 625 | Q7ZTJ1;CL468Contig4                                   | Slc25a3-prov protein OS=Xenopus laevis GN=slc25a3 PE=         | 12.26 | 6   | 1 | 3 | 14  |
| 626 | DC034728 homologue to UniRef100_Q7ZYF0 Cluster: H     | Rep: Hdac6-prov protein - Xenopus laevis (African clawed f    | 12.24 | 1   | 1 | 1 | 1   |
| 627 | A3KNF4                                                | LOC100049121 protein OS=Xenopus laevis GN=LOC1000             | 12.24 | 2   | 1 | 1 | 11  |
| 628 | Q3B8E3                                                | Phospholysine phosphohistidine inorganic pyrophosphate p      | 12.22 | 1   | 1 | 1 | 1   |
| 629 | BP686589 homologue to UniRef100_Q801N7 Cluster: LC    | Rep: LOC398570 protein - Xenopus laevis (African clawed f     | 12.20 | 3   | 1 | 1 | 1   |
| 630 | CL12084Contig1                                        | CL12084Contig1                                                | 12.18 | 1   | 1 | 1 | 3   |
| 631 | Q66L24                                                | MGC85230 protein OS=Xenopus laevis GN=atp5l PE=4 SV           | 12.15 | 3   | 1 | 1 | 11  |
| 632 | dsrrswapns_comp210199_c6_seq1                         | len=1347                                                      | 12.15 | 3   | 1 | 1 | 1   |
| 633 | B7ZRR7                                                | GATA binding factor-1b OS=Xenopus laevis GN=gata1b-A          | 12.09 | 1   | 1 | 1 | 1   |
| 634 | dsrrswapns_comp215320_c1_seq2                         | len=1042                                                      | 12.08 | 2   | 1 | 1 | 1   |
| 635 | Q05AY5                                                | LOC414691 protein OS=Xenopus laevis GN=LOC414691 F            | 12.06 | 5   | 1 | 1 | 1   |
| 636 | A0AUU3                                                | Cox7a2b protein OS=Xenopus laevis GN=cox7a2 PE=4 SV           | 12.05 | 2   | 1 | 1 | 1   |
| 637 | Q801S2;CL3774Contig1                                  | Succinate dehydrogenase [ubiquinone] flavoprotein subunit     | 12.03 | 1   | 1 | 3 | 89  |
| 638 | B7ZSI6                                                | LOC100126641 protein OS=Xenopus laevis GN=LOC1001             | 12.01 | 2   | 1 | 1 | 2   |
| 639 | Q7ZX30                                                | Spx-prov protein OS=Xenopus laevis GN=sf3b4 PE=2 SV=          | 11.94 | 2   | 1 | 1 | 1   |
| 640 | Q6AXB3;CL3237Contig1                                  | MGC79128 protein OS=Xenopus laevis GN=shmt2 PE=2 S            | 11.90 | 3   | 2 | 4 | 42  |
| 641 | CL921Contig2                                          | CL921Contig2                                                  | 11.90 | 2   | 1 | 1 | 2   |
| 642 | Q5M9A1                                                | LOC496155 protein OS=Xenopus laevis GN=wwtr1 PE=2 S           | 11.81 | 1   | 1 | 1 | 1   |
| 643 | CL24495Contig1                                        | CL24495Contig1                                                | 11.81 | 1   | 1 | 1 | 3   |
| 644 | CL3255Contig1                                         | CL3255Contig1                                                 | 11.74 | 4   | 1 | 1 | 1   |
| 645 | CL4566Contig2                                         | CL4566Contig2                                                 | 11.70 | 2   | 1 | 1 | 1   |
| 646 | CL8785Contig2                                         | CL8785Contig2                                                 | 11.64 | 2   | 1 | 1 | 1   |
| 647 | Q9DFC2                                                | Homeobox protein XHox11L2 OS=Xenopus laevis GN=tlx3           | 11.64 | 1   | 1 | 1 | 1   |
| 648 | CL1039Contig2                                         | CL1039Contig2                                                 | 11.63 | 1   | 1 | 1 | 1   |
| 649 | BJ029212 UniRef100_Q7ZX42 Cluster: Cell division prot | Rep: Cell division protein kinase 9-B - Xenopus laevis (Afric | 11.56 | 1   | 1 | 1 | 1   |
| 650 | Q6DJQ1;CL8372Contig1                                  | MGC81800 protein OS=Xenopus laevis GN=mgst3 PE=2 S            | 11.56 | 1   | 1 | 1 | 64  |
| 651 | CL71Contig1                                           | CL71Contig1                                                   | 11.54 | 4   | 1 | 1 | 2   |
| 652 | dsrrswapns_comp209900_c0_seq8                         | len=1568                                                      | 11.50 | 1   | 1 | 1 | 1   |
| 653 | CL2814Contig2                                         | CL2814Contig2                                                 | 11.45 | 1   | 1 | 1 | 1   |
| 654 | Q7SZ11;CL1890Contig5                                  | Annexin OS=Xenopus laevis PE=2 SV=1 - [Q7SZ11_XENL            | 11.37 | 8   | 3 | 3 | 28  |
| 655 | dsrrswapns_comp213683_c2_seq3                         | len=1326                                                      | 11.36 | 2   | 1 | 1 | 1   |
| 656 | Q7TOW4                                                | Vps28-prov protein OS=Xenopus laevis GN=vps28 PE=1 S          | 11.31 | 1   | 1 | 1 | 1   |
| 657 | Q802B7;CL5322Contig1                                  | Ndufs1-prov protein OS=Xenopus laevis GN=ndufs1 PE=2          | 11.28 | 2   | 5 | 5 | 35  |
| 658 | dsrrswapns_comp211238_c0_seq3                         | len=1138                                                      | 11.25 | 1   | 1 | 1 | 1   |
| 659 | Q7ZYI5;CL3906Contig2                                  | Baf53a-pending-prov protein OS=Xenopus laevis GN=actf6        | 11.19 | 1   | 1 | 1 | 5   |
| 660 | CD362892 homologue to UniRef100_A5A6L4 Cluster: Cl    | Rep: CD74 molecule, major histocompatibility complex, clas    | 11.19 | 1   | 1 | 1 | 1   |
| 661 | B1H1N8;CL525Contig5                                   | LOC100036826 protein OS=Xenopus laevis GN=LOC1000             | 11.16 | 10  | 3 | 3 | 32  |
| 662 | A4PB26                                                | Protein CDV3 homolog B OS=Xenopus laevis GN=cdv3-b F          | 11.16 | 1   | 1 | 1 | 1   |
| 663 | Q6AZV2;CL1314Contig1                                  | Gcdh-prov protein OS=Xenopus laevis GN=gcdh PE=2 SV=          | 11.14 | 2   | 2 | 2 | 6   |
| 664 | Q6NTQ9;CL7675Contig2                                  | Ndufa10b protein OS=Xenopus laevis GN=ndufa10 PE=2 S          | 11.11 | 3   | 2 | 2 | 8   |
| 665 | dsrrswapns_comp208039_c0_seq3                         | len=1233                                                      | 11.04 | 1   | 1 | 1 | 1   |
| 666 | Q5XG13                                                | Putative uncharacterized protein OS=Xenopus laevis PE=2       | 11.04 | 3   | 2 | 2 | 2   |
| 667 | P54824                                                | ATP-dependent RNA helicase ddx6 OS=Xenopus laevis GN          | 11.02 | 292 | 3 | 4 | 10  |
| 668 | TC444012 homologue to UniRef100_UPI00004D2264 Cl      | Rep: DnaJ homolog subfamily C member 14 (Dopamine red         | 11.00 | 1   | 1 | 1 | 1   |
| 669 | dsrrswapns_comp211746_c0_seq9                         | len=685                                                       | 10.97 | 2   | 1 | 1 | 2   |
| 670 | CD362591 weakly similar to UniRef100_Q07497 Cluster:  | Rep: Ephrin type-B receptor 5 precursor - Gallus gallus (Ch   | 10.96 | 1   | 1 | 1 | 1   |
| 671 | CL5368Contig2                                         | CL5368Contig2                                                 | 10.93 | 1   | 2 | 2 | 3   |
| 672 | Q91868                                                | Rat translocon-associated protein delta homolog OS=Xeno       | 10.92 | 1   | 1 | 1 | 2   |
| 673 | Q4KLF3                                                | Protein KTI12 homolog OS=Xenopus laevis GN=kti12 PE=2         | 10.91 | 290 | 1 | 2 | 2   |
| 674 | Q8AVU2                                                | Ubiquitin-conjugating enzyme E2 S-B OS=Xenopus laevis         | 10.90 | 1   | 1 | 1 | 1   |
| 675 | CL11663Contig1                                        | CL11663Contig1                                                | 10.86 | 2   | 2 | 2 | 3   |
| 676 | Q6DDF9                                                | MGC84581 protein OS=Xenopus laevis GN=MGC84581 PE             | 10.85 | 2   | 2 | 2 | 2   |
| 677 | Q5XGQ1                                                | LOC495170 protein OS=Xenopus laevis GN=LOC495170 F            | 10.84 | 1   | 1 | 1 | 1   |
| 678 | Q5XGR8                                                | Beta-lactamase-like protein 2 OS=Xenopus laevis GN=lact       | 10.80 | 227 | 1 | 2 | 2   |
| 679 | Q0IHC9                                                | MGC154449 protein OS=Xenopus laevis GN=niif31 PE=2 S          | 10.76 | 1   | 1 | 1 | 1   |

|     |                                                      |                                                              |       |     |   |   |     |
|-----|------------------------------------------------------|--------------------------------------------------------------|-------|-----|---|---|-----|
| 680 | EB465665 weakly similar to UniRef100_Q8BGZ7 Cluster: | Rep: Keratin, type II cytoskeletal 75 - Mus musculus (Mouse) | 10.71 | 1   | 1 | 1 | 1   |
| 681 | C0J6M5                                               | MEF2A alpha 12b isoform OS=Xenopus laevis PE=2 SV=1          | 10.71 | 1   | 1 | 1 | 3   |
| 682 | Q7ZTB3;CL289Contig3                                  | Heat shock protein gp96 OS=Xenopus laevis GN=hsp90b1         | 10.70 | 4   | 1 | 7 | 174 |
| 683 | Q91840;CL994Contig4                                  | Retinoid X receptor beta OS=Xenopus laevis GN=rxrb PE=2      | 10.68 | 9   | 2 | 2 | 3   |
| 684 | Q7ZWW3;CL7106Contig1                                 | Ferritin OS=Xenopus laevis PE=2 SV=1 - [Q7ZWW3_XENL          | 10.67 | 3   | 2 | 2 | 27  |
| 685 | CL4179Contig3                                        | CL4179Contig3                                                | 10.66 | 5   | 1 | 2 | 5   |
| 686 | Q6DE33;CL4688Contig1                                 | Uqcr2 protein OS=Xenopus laevis GN=uqcr2 PE=2 SV=1           | 10.64 | 4   | 3 | 3 | 66  |
| 687 | Q7ZXI5;CL2254Contig3                                 | Snf protein OS=Xenopus laevis GN=snrpa PE=2 SV=1 - [Q        | 10.64 | 3   | 1 | 1 | 3   |
| 688 | Q4VAE4                                               | MGC115325 protein OS=Xenopus laevis GN=MGC115325             | 10.63 | 1   | 1 | 1 | 1   |
| 689 | Q2T9K3                                               | MGC131110 protein OS=Xenopus laevis GN=MGC131110             | 10.61 | 1   | 1 | 1 | 1   |
| 690 | CL39443Contig1                                       | CL39443Contig1                                               | 10.59 | 1   | 2 | 2 | 2   |
| 691 | Q4QR21                                               | Putative uncharacterized protein (Fragment) OS=Xenopus l     | 10.58 | 1   | 1 | 1 | 1   |
| 692 | CL4774Contig1                                        | CL4774Contig1                                                | 10.57 | 4   | 2 | 2 | 19  |
| 693 | Q5PPY1;TC467635 similar to UniRef100_Q53DG9 Clust    | Malignant T-cell-amplified sequence 1-A OS=Xenopus laev      | 10.50 | 2   | 1 | 1 | 5   |
| 694 | Q6P7F8;CL9604Contig1                                 | MGC68767 protein OS=Xenopus laevis GN=napsa PE=2 S           | 10.46 | 1   | 1 | 1 | 2   |
| 695 | CL40442Contig1                                       | CL40442Contig1                                               | 10.45 | 2   | 1 | 1 | 1   |
| 696 | Q7SZ43                                               | Mylc2a-prov protein OS=Xenopus laevis PE=2 SV=1 - [Q7S       | 10.40 | 3   | 1 | 1 | 1   |
| 697 | Q7ZXC1                                               | Smardc1 protein (Fragment) OS=Xenopus laevis GN=Smar         | 10.40 | 5   | 1 | 1 | 2   |
| 698 | CL1Contig1051                                        | CL1Contig1051                                                | 10.34 | 1   | 1 | 1 | 1   |
| 699 | Q6DKA5                                               | MGC84756 protein OS=Xenopus laevis GN=hsd17b11 PE=           | 10.33 | 2   | 1 | 1 | 1   |
| 700 | Q8AXY7                                               | Pygopus-2beta OS=Xenopus laevis PE=2 SV=1 - [Q8AXY7          | 10.33 | 1   | 1 | 1 | 1   |
| 701 | Q52KV8                                               | MGC115036 protein OS=Xenopus laevis GN=MGC115036             | 10.32 | 1   | 1 | 1 | 1   |
| 702 | CL728Contig4                                         | CL728Contig4                                                 | 10.31 | 1   | 1 | 1 | 1   |
| 703 | dsrrswapns_comp187784_c0_seq1                        | len=329                                                      | 10.31 | 1   | 1 | 1 | 1   |
| 704 | CX133910                                             | CX133910                                                     | 10.28 | 4   | 1 | 1 | 1   |
| 705 | TC453615 similar to UniRef100_Q6GQ25 Cluster: MGC8   | Rep: MGC80407 protein - Xenopus laevis (African clawed f     | 10.26 | 3   | 1 | 1 | 1   |
| 706 | P79937                                               | Homeobox protein Meis1 OS=Xenopus laevis GN=meis1 P          | 10.26 | 5   | 2 | 2 | 2   |
| 707 | CL5749Contig1                                        | CL5749Contig1                                                | 10.24 | 3   | 2 | 2 | 79  |
| 708 | CL32735Contig1                                       | CL32735Contig1                                               | 10.23 | 1   | 1 | 1 | 1   |
| 709 | Q6NUB1                                               | MGC81092 protein OS=Xenopus laevis GN=thul16 PE=2 S          | 10.23 | 1   | 1 | 1 | 1   |
| 710 | Q90ZB7                                               | Lymphoid enhancer factor XLEF-1B OS=Xenopus laevis Gf        | 10.22 | 2   | 1 | 1 | 1   |
| 711 | CL13504Contig1                                       | CL13504Contig1                                               | 10.21 | 1   | 1 | 1 | 1   |
| 712 | CL23092Contig1                                       | CL23092Contig1                                               | 10.19 | 1   | 1 | 1 | 1   |
| 713 | TC465972 similar to UniRef100_UPI000065DF7B Clust    | Rep: Probable ATP-dependent RNA helicase DHX37 (EC 3         | 10.14 | 1   | 1 | 1 | 1   |
| 714 | TC467277 homologue to UniRef100_Q9I8T0 Cluster: Cal  | Rep: Calpain - Xenopus laevis (African clawed frog), partial | 10.14 | 1   | 1 | 1 | 1   |
| 715 | CL12250Contig1                                       | CL12250Contig1                                               | 10.12 | 2   | 1 | 1 | 1   |
| 716 | CL26381Contig1                                       | CL26381Contig1                                               | 10.07 | 2   | 1 | 1 | 1   |
| 717 | B7ZR65                                               | Transcription factor Sox-9-A OS=Xenopus laevis GN=sox9-      | 10.06 | 1   | 1 | 1 | 1   |
| 718 | Q708W2                                               | Forkhead box protein J1-A OS=Xenopus laevis GN=foxj1-a       | 10.02 | 1   | 1 | 1 | 1   |
| 719 | Q4QQP6;CL19376Contig1                                | Putative uncharacterized protein OS=Xenopus laevis PE=2      | 10.00 | 200 | 1 | 2 | 5   |
| 720 | dsrrswapns_comp192152_c0_seq1                        | len=453                                                      | 10.00 | 2   | 1 | 1 | 1   |
| 721 | B1WBD3                                               | LOC100158432 protein OS=Xenopus laevis GN=aars PE=2          | 9.92  | 3   | 4 | 4 | 5   |
| 722 | Q3B8D3                                               | MGC68480 protein OS=Xenopus laevis GN=MGC68480 PE            | 9.91  | 4   | 1 | 1 | 20  |
| 723 | Q6AZN8;CL5215Contig3                                 | Zinc transporter 6-A OS=Xenopus laevis GN=slc30a6-a PE       | 9.91  | 1   | 1 | 1 | 7   |
| 724 | A2VDC7                                               | Ribonuclease kappa-A OS=Xenopus laevis GN=rnasek-a P         | 9.90  | 2   | 1 | 1 | 2   |
| 725 | Q6IRA2;CL1Contig101                                  | XTm4 protein OS=Xenopus laevis GN=XTm4 PE=2 SV=1 -           | 9.87  | 30  | 1 | 1 | 2   |
| 726 | Q0IHG7                                               | Stk4 protein OS=Xenopus laevis GN=stk4 PE=2 SV=1 - [Q        | 9.83  | 1   | 1 | 1 | 1   |
| 727 | Q6GR45;dsrrswapns_comp203528_c0_seq3                 | Eukaryotic translation initiation factor 6 OS=Xenopus laevis | 9.80  | 2   | 1 | 1 | 5   |
| 728 | Q8QFV1                                               | Isthmin OS=Xenopus laevis GN=ism1 PE=2 SV=1 - [ISM_X         | 9.80  | 1   | 1 | 1 | 1   |
| 729 | TC462923 UniRef100_Q7ZXX8 Cluster: Hnrpk protein; n  | Rep: Hnrpk protein - Xenopus laevis (African clawed frog), f | 9.78  | 1   | 1 | 1 | 1   |
| 730 | CL32492Contig1                                       | CL32492Contig1                                               | 9.75  | 1   | 1 | 1 | 3   |
| 731 | Q68EX4                                               | Proteasome subunit beta type OS=Xenopus laevis GN=psn        | 9.75  | 230 | 1 | 2 | 3   |
| 732 | CL4179Contig1                                        | CL4179Contig1                                                | 9.73  | 4   | 1 | 2 | 9   |
| 733 | CL31289Contig1                                       | CL31289Contig1                                               | 9.73  | 1   | 1 | 1 | 1   |
| 734 | Q6DDM0                                               | MGC83329 protein OS=Xenopus laevis GN=MGC83329 PE            | 9.70  | 544 | 1 | 3 | 3   |
| 735 | B5MFE9                                               | Olfactomedin-like protein 3 OS=Xenopus laevis GN=olfml3      | 9.69  | 1   | 1 | 1 | 1   |
| 736 | CL8066Contig1                                        | CL8066Contig1                                                | 9.68  | 2   | 1 | 1 | 1   |
| 737 | dsrrswapns_comp216043_c4_seq13                       | len=2424                                                     | 9.68  | 1   | 1 | 1 | 1   |
| 738 | CL22Contig18                                         | CL22Contig18                                                 | 9.63  | 5   | 1 | 1 | 10  |
| 739 | Q58E21                                               | Proteasome subunit alpha type OS=Xenopus laevis GN=ps        | 9.58  | 6   | 2 | 2 | 13  |
| 740 | Q3B8J8                                               | Succinate dehydrogenase [ubiquinone] iron-sulfur subunit, i  | 9.57  | 7   | 3 | 3 | 12  |
| 741 | Q0IHF9                                               | Store-operated calcium entry-associated regulatory factor C  | 9.57  | 1   | 1 | 1 | 1   |
| 742 | Q52KN0;CL14329Contig1                                | MGC115198 protein OS=Xenopus laevis GN=MGC115198             | 9.54  | 1   | 1 | 1 | 8   |
| 743 | Q6GM67                                               | MGC83388 protein OS=Xenopus laevis GN=MGC83388 PE            | 9.49  | 1   | 1 | 1 | 2   |
| 744 | dsrrswapns_comp215263_c2_seq3                        | len=1750                                                     | 9.47  | 3   | 1 | 1 | 2   |
| 745 | Q8AVS4                                               | Transcriptional activator protein Pur-beta-B OS=Xenopus la   | 9.45  | 1   | 1 | 1 | 1   |
| 746 | Q6DCL1                                               | MGC82412 protein OS=Xenopus laevis GN=bpnt1 PE=2 S'          | 9.42  | 2   | 1 | 1 | 2   |
| 747 | CL4493Contig1                                        | CL4493Contig1                                                | 9.41  | 2   | 1 | 1 | 1   |
| 748 | A2RV96                                               | LOC496076 protein OS=Xenopus laevis GN=lrcc34 PE=2 S         | 9.40  | 1   | 1 | 1 | 1   |
| 749 | P55863                                               | Transcription factor Sox-3-A OS=Xenopus laevis GN=sox3-      | 9.39  | 1   | 1 | 1 | 1   |
| 750 | Q6G9R9                                               | Dolichyl-diphosphooligosaccharide--protein glycosyltransfer  | 9.36  | 1   | 1 | 1 | 1   |
| 751 | CL3508Contig1                                        | CL3508Contig1                                                | 9.35  | 4   | 1 | 1 | 2   |
| 752 | CL9213Contig2                                        | CL9213Contig2                                                | 9.31  | 1   | 1 | 1 | 2   |
| 753 | Q05AW6;CL3514Contig2                                 | MGC154502 protein OS=Xenopus laevis GN=MGC154502             | 9.31  | 2   | 1 | 1 | 2   |
| 754 | dsrrswapns_comp198030_c0_seq1                        | len=1959                                                     | 9.25  | 3   | 1 | 1 | 1   |
| 755 | Q9W7F2;CL2204Contig2                                 | WD repeat-containing protein 1-A OS=Xenopus laevis GN=       | 9.23  | 8   | 3 | 3 | 17  |
| 756 | Q7ZYM3;CL5801Contig1                                 | Gpd1 protein OS=Xenopus laevis GN=gpd1 PE=2 SV=2 - [i        | 9.20  | 1   | 1 | 1 | 5   |
| 757 | Q6IP53;CL7135Contig1                                 | MGC78949 protein OS=Xenopus laevis GN=tekt1 PE=2 SV          | 9.20  | 3   | 2 | 2 | 3   |
| 758 | Q6AZM8                                               | Sh3glb2-prov protein OS=Xenopus laevis GN=sh3glb2 PE=        | 9.18  | 1   | 1 | 1 | 1   |
| 759 | Q05AY9                                               | LOC398450 protein OS=Xenopus laevis GN=LOC398450 F           | 9.15  | 7   | 2 | 2 | 20  |
| 760 | Q2VPL7                                               | LOC733431 protein (Fragment) OS=Xenopus laevis GN=Lf         | 9.12  | 2   | 2 | 2 | 5   |
| 761 | Q6DJP2                                               | MGC81911 protein OS=Xenopus laevis GN=ech1 PE=2 SV           | 9.12  | 2   | 2 | 2 | 4   |
| 762 | A2VDD2                                               | Tctex1 domain-containing protein 1-B (Fragment) OS=Xenc      | 9.09  | 2   | 1 | 1 | 1   |
| 763 | zeinaSsns_comp338451_c0_seq1                         | len=210                                                      | 9.09  | 1   | 1 | 1 | 1   |
| 764 | CL3908Contig1                                        | CL3908Contig1                                                | 9.09  | 1   | 1 | 1 | 1   |
| 765 | Q7SZB0;CL1525Contig1                                 | Rp135a-prov protein OS=Xenopus laevis GN=rp135a PE=4 ;       | 9.09  | 4   | 1 | 1 | 3   |

|     |                                                      |                                                               |      |     |   |   |     |
|-----|------------------------------------------------------|---------------------------------------------------------------|------|-----|---|---|-----|
| 766 | dsrrswapns_comp209500_c1_seq3                        | len=1654                                                      | 9.03 | 2   | 1 | 1 | 1   |
| 767 | A1L2I6                                               | LOC100036860 protein OS=Xenopus laevis GN=LOC1000:            | 9.03 | 2   | 1 | 1 | 1   |
| 768 | B7ZS71                                               | Putative uncharacterized protein OS=Xenopus laevis PE=2       | 9.00 | 6   | 2 | 2 | 2   |
| 769 | dsrrswapns_comp211447_c1_seq1                        | len=2210                                                      | 9.00 | 3   | 1 | 3 | 3   |
| 770 | Q2T9K2                                               | Transcription factor AP-2-epsilon OS=Xenopus laevis GN=t      | 8.99 | 1   | 1 | 1 | 1   |
| 771 | DT076135 homologue to UniRef100_Q0Vfq9 Cluster: S    | Rep: Selenophosphate synthetase 2 - Xenopus tropicalis (V     | 8.86 | 2   | 1 | 1 | 1   |
| 772 | Q6DCF9;CL15Contig5                                   | Annexin OS=Xenopus laevis GN=anxa7 PE=2 SV=1 - [Q6C           | 8.85 | 293 | 2 | 3 | 26  |
| 773 | CL2457Contig1                                        | CL2457Contig1                                                 | 8.84 | 2   | 1 | 1 | 2   |
| 774 | CL14648Contig1                                       | CL14648Contig1                                                | 8.84 | 2   | 2 | 2 | 6   |
| 775 | A9UM22                                               | LOC100137679 protein (Fragment) OS=Xenopus laevis GN          | 8.81 | 2   | 1 | 1 | 2   |
| 776 | dsrrswapns_comp215430_c0_seq1                        | len=990                                                       | 8.81 | 1   | 1 | 1 | 1   |
| 777 | Q7ZTJ4                                               | Vha55 protein OS=Xenopus laevis GN=atp6v1b2 PE=2 SV:          | 8.81 | 1   | 2 | 2 | 2   |
| 778 | Q63ZU5                                               | LOC494732 protein OS=Xenopus laevis GN=tsc22d1 PE=2           | 8.76 | 1   | 1 | 1 | 1   |
| 779 | CL282Contig6                                         | CL282Contig6                                                  | 8.72 | 5   | 1 | 1 | 2   |
| 780 | A2BD73                                               | LOC100037109 protein (Fragment) OS=Xenopus laevis GN          | 8.72 | 1   | 1 | 1 | 1   |
| 781 | Q5U484                                               | LOC495520 protein (Fragment) OS=Xenopus laevis GN=L(          | 8.71 | 3   | 1 | 1 | 3   |
| 782 | Q1JQ83                                               | MGC130971 protein OS=Xenopus laevis GN=scml2 PE=2             | 8.71 | 227 | 2 | 3 | 3   |
| 783 | Q66KT2                                               | MGC85457 protein OS=Xenopus laevis GN=ndufs8 PE=2             | 8.70 | 3   | 1 | 1 | 46  |
| 784 | Q6GPD6;CL2008Contig2                                 | MGC80474 protein OS=Xenopus laevis GN=cnpy2 PE=2 S            | 8.70 | 1   | 1 | 1 | 7   |
| 785 | Q6IRP1                                               | Grx5-prov protein (Fragment) OS=Xenopus laevis GN=grx5        | 8.67 | 3   | 1 | 1 | 2   |
| 786 | CL19751Contig1                                       | CL19751Contig1                                                | 8.66 | 2   | 1 | 1 | 2   |
| 787 | Q7ZWX9                                               | Midnolin-B OS=Xenopus laevis GN=midn-b PE=2 SV=1 - [M         | 8.65 | 1   | 1 | 1 | 1   |
| 788 | CL17316Contig1                                       | CL17316Contig1                                                | 8.65 | 1   | 1 | 1 | 1   |
| 789 | A5D8M8                                               | LOC100049751 protein OS=Xenopus laevis GN=nqo1 PE=            | 8.63 | 2   | 1 | 1 | 2   |
| 790 | Q7ZYS4;CL2863Contig4                                 | MGC53685 protein OS=Xenopus laevis GN=MGC53685 PE             | 8.62 | 2   | 1 | 1 | 2   |
| 791 | dsrrswapns_comp204377_c0_seq2                        | len=847                                                       | 8.62 | 2   | 1 | 1 | 1   |
| 792 | Q2TAT7;CL10539Contig1                                | MGC130882 protein OS=Xenopus laevis GN=uqcrq PE=4             | 8.54 | 3   | 1 | 1 | 3   |
| 793 | CL25612Contig1                                       | CL25612Contig1                                                | 8.52 | 1   | 1 | 1 | 1   |
| 794 | O13097;CL3156Contig1                                 | Ephrin-B1 OS=Xenopus laevis GN=efnb1 PE=2 SV=2 - [EF          | 8.51 | 1   | 1 | 1 | 3   |
| 795 | Q5U498                                               | LOC495510 protein OS=Xenopus laevis GN=nxpe2 PE=2             | 8.49 | 3   | 1 | 1 | 3   |
| 796 | Q66KU5;TC432828 UniRef100_Q66KU5 Cluster: MGC8       | MGC85428 protein OS=Xenopus laevis GN=rpl36a PE=3 S           | 8.49 | 5   | 1 | 1 | 9   |
| 797 | Q9PVY8                                               | Forkhead box protein C2-B OS=Xenopus laevis GN=foxc2-         | 8.46 | 1   | 1 | 1 | 2   |
| 798 | CL120Contig6                                         | CL120Contig6                                                  | 8.45 | 3   | 1 | 3 | 3   |
| 799 | Q6E2P0                                               | Urocortin 3 OS=Xenopus laevis GN=ucn3 PE=2 SV=1 - [Q6         | 8.44 | 253 | 1 | 2 | 121 |
| 800 | Q3B8H6                                               | Pofut1 protein OS=Xenopus laevis GN=pofut1 PE=2 SV=1          | 8.42 | 2   | 1 | 1 | 1   |
| 801 | CL791Contig1                                         | CL791Contig1                                                  | 8.41 | 1   | 1 | 1 | 1   |
| 802 | A1L2I5;CL5868Contig1                                 | Histone H2A OS=Xenopus laevis GN=h2afy PE=2 SV=1 - [.         | 8.40 | 1   | 1 | 1 | 2   |
| 803 | Q5M7C6                                               | Glutathione peroxidase OS=Xenopus laevis GN=gpx1 PE=:         | 8.39 | 1   | 1 | 1 | 2   |
| 804 | TC448187 homologue to UniRef100_UPI00006A003E Cl     | Rep: Tripartite motif-containing protein 44 (Protein DIPB). - | 8.38 | 3   | 1 | 1 | 1   |
| 805 | Q5M7A9                                               | MGC81803 protein OS=Xenopus laevis GN=MGC81803 PE             | 8.37 | 228 | 1 | 2 | 2   |
| 806 | dsrrswapns_comp215388_c4_seq3                        | len=2200                                                      | 8.33 | 2   | 1 | 1 | 3   |
| 807 | Q98SU0                                               | K-Cl cotransporter (Fragment) OS=Xenopus laevis GN=KC         | 8.31 | 1   | 1 | 1 | 3   |
| 808 | Q6DE67                                               | Putative uncharacterized protein OS=Xenopus laevis PE=2       | 8.29 | 1   | 1 | 1 | 1   |
| 809 | CL6737Contig1                                        | CL6737Contig1                                                 | 8.28 | 1   | 1 | 1 | 1   |
| 810 | Q3KQ55                                               | MGC130949 protein OS=Xenopus laevis GN=uevfl PE=2             | 8.22 | 1   | 1 | 1 | 1   |
| 811 | Q63ZJ1                                               | LOC494796 protein OS=Xenopus laevis GN=suclg1 PE=2            | 8.21 | 3   | 1 | 1 | 51  |
| 812 | Q6GPL6                                               | MGC83560 protein OS=Xenopus laevis GN=gca PE=2 SV=:           | 8.21 | 2   | 1 | 2 | 2   |
| 813 | Q6DFT8;CL48Contig18                                  | Bcap31 protein OS=Xenopus laevis GN=bcap31 PE=2 SV=           | 8.20 | 3   | 1 | 1 | 12  |
| 814 | A3KNC9                                               | LOC100049107 protein OS=Xenopus laevis GN=zfp161 PE           | 8.19 | 1   | 1 | 1 | 1   |
| 815 | CL5478Contig2                                        | CL5478Contig2                                                 | 8.18 | 1   | 1 | 1 | 2   |
| 816 | Q6GN63;CL5122Contig1                                 | MGC82998 protein OS=Xenopus laevis GN=idh3a PE=2 SV           | 8.15 | 2   | 3 | 3 | 21  |
| 817 | Q6GM08;CL9083Contig1                                 | MGC84065 protein OS=Xenopus laevis GN=ntm PE=2 SV=            | 8.12 | 1   | 1 | 1 | 3   |
| 818 | Q05116;dsrrswapns_comp213483_c2_seq6                 | Dual specificity mitogen-activated protein kinase kinase 1 C  | 8.10 | 1   | 1 | 1 | 4   |
| 819 | TC444688 UniRef100_Q7T0N7 Cluster: Ctsc protein; n=1 | Rep: Ctsc protein - Xenopus laevis (African clawed frog), cc  | 8.08 | 4   | 1 | 2 | 5   |
| 820 | Q5M9A9                                               | LOC496147 protein OS=Xenopus laevis GN=LOC496147 F            | 8.07 | 1   | 1 | 1 | 1   |
| 821 | BQ400069 similar to UniRef100_UPI000069DA2D Cluste   | Rep: Tyrosine-protein kinase receptor Tie-1 precursor (EC :   | 8.05 | 2   | 1 | 1 | 2   |
| 822 | Q640C3                                               | LOC494728 protein OS=Xenopus laevis GN=umps PE=2 S            | 8.03 | 1   | 1 | 1 | 1   |
| 823 | Q566F3;CL9914Contig1                                 | MGC114950 protein OS=Xenopus laevis GN=slc45a2 PE=:           | 8.03 | 1   | 1 | 1 | 2   |
| 824 | Q5IJ69;CL32Contig6                                   | MTGR1 OS=Xenopus laevis PE=2 SV=1 - [Q5IJ69_XENLA             | 8.02 | 3   | 1 | 1 | 3   |
| 825 | TC454792 UniRef100_Q0IH35 Cluster: MGC154791 prot    | Rep: MGC154791 protein - Xenopus laevis (African clawe        | 8.00 | 6   | 1 | 1 | 3   |
| 826 | Q90YE5;CL4860Contig2                                 | MAD, mothers against decapentaplegic homolog 3 OS=Xer         | 8.00 | 2   | 1 | 1 | 4   |
| 827 | CL11416Contig1                                       | CL11416Contig1                                                | 7.99 | 1   | 1 | 1 | 1   |
| 828 | BJ042996 weakly similar to UniRef100_A4QN64 Cluster: | Rep: Zgc:162320 protein - Danio rerio (Zebrafish) (Brachyd    | 7.98 | 5   | 1 | 1 | 2   |
| 829 | Q5FWN6                                               | MGC85173 protein OS=Xenopus laevis GN=tbc1d19 PE=2            | 7.97 | 1   | 1 | 1 | 1   |
| 830 | dsrrswapns_comp208635_c0_seq2                        | len=771                                                       | 7.95 | 1   | 1 | 1 | 1   |
| 831 | CL13058Contig1                                       | CL13058Contig1                                                | 7.92 | 3   | 1 | 1 | 2   |
| 832 | P05377                                               | Acetylcholine receptor subunit alpha-1-B OS=Xenopus laev      | 7.88 | 2   | 1 | 1 | 1   |
| 833 | Q2NLB0                                               | UPF0469 protein KIAA0907 homolog OS=Xenopus laevis F          | 7.86 | 1   | 1 | 1 | 1   |
| 834 | Q6EE56                                               | Aminolevulinic acid synthase 1 (Fragment) OS=Xenopus lai      | 7.85 | 1   | 1 | 1 | 1   |
| 835 | Q4KL91;CL4667Contig1                                 | Proton-coupled amino acid transporter 4 OS=Xenopus laev       | 7.85 | 1   | 1 | 1 | 7   |
| 836 | dsrrswapns_comp209464_c0_seq2                        | len=2027                                                      | 7.84 | 2   | 1 | 1 | 1   |
| 837 | Q0IH27                                               | Hmg20b protein OS=Xenopus laevis GN=hmg20b PE=2 SV            | 7.84 | 1   | 1 | 1 | 1   |
| 838 | Q6DCS5                                               | MGC80849 protein OS=Xenopus laevis GN=MGC80849 PE             | 7.83 | 1   | 1 | 1 | 1   |
| 839 | A5D8M0                                               | Tyrosyl-DNA phosphodiesterase 2 OS=Xenopus laevis GN:         | 7.82 | 1   | 1 | 1 | 1   |
| 840 | Q7ZTK9;CL7196Contig1                                 | Aspartate aminotransferase OS=Xenopus laevis GN=got1 F        | 7.79 | 291 | 2 | 3 | 8   |
| 841 | Q6GQ37;CL8951Contig1                                 | Protein midA homolog, mitochondrial OS=Xenopus laevis P       | 7.78 | 1   | 1 | 1 | 2   |
| 842 | dsrrswapns_comp195977_c0_seq1                        | len=790                                                       | 7.76 | 1   | 1 | 1 | 7   |
| 843 | Q8AVV5;CL253Contig3                                  | Ywhaz-prov protein OS=Xenopus laevis GN=ywhaz PE=2            | 7.76 | 5   | 1 | 2 | 42  |
| 844 | CL7064Contig1                                        | CL7064Contig1                                                 | 7.71 | 1   | 1 | 1 | 1   |
| 845 | P08478;CL660Contig2                                  | Peptidyl-glycine alpha-amidating monooxygenase A OS=Xe        | 7.70 | 3   | 2 | 2 | 4   |
| 846 | Q8QFW7;CL1631Contig2                                 | Ribosomal protein L34 OS=Xenopus laevis GN=rpl34 PE=4         | 7.69 | 2   | 1 | 1 | 18  |
| 847 | Q6P412;CL2784Contig1                                 | MGC68722 protein OS=Xenopus laevis GN=rab15 PE=2 S            | 7.69 | 67  | 1 | 1 | 6   |
| 848 | CL14445Contig1                                       | CL14445Contig1                                                | 7.66 | 3   | 1 | 1 | 1   |
| 849 | CL9501Contig1                                        | CL9501Contig1                                                 | 7.66 | 1   | 1 | 1 | 1   |
| 850 | Q6IP78                                               | LOC432230 protein (Fragment) OS=Xenopus laevis GN=L(          | 7.62 | 5   | 3 | 3 | 6   |
| 851 | Q6GQD7;CL206Contig9                                  | AT-rich interactive domain-containing protein 3A OS=Xenop     | 7.61 | 2   | 1 | 1 | 2   |

|     |                                                    |                                                             |      |     |   |   |   |    |
|-----|----------------------------------------------------|-------------------------------------------------------------|------|-----|---|---|---|----|
| 852 | Q5U491                                             | LOC495515 protein (Fragment) OS=Xenopus laevis GN=L         | 7.61 |     | 4 | 2 | 2 | 8  |
| 853 | A2BD52                                             | LOC100158263 protein (Fragment) OS=Xenopus laevis GN        | 7.61 |     | 3 | 1 | 1 | 1  |
| 854 | Q32NU1;CL3333Contig1                               | Putative uncharacterized protein OS=Xenopus laevis PE=2     | 7.61 |     | 4 | 1 | 1 | 2  |
| 855 | CL2859Contig3                                      | CL2859Contig3                                               | 7.60 |     | 4 | 1 | 1 | 1  |
| 856 | Q6DF71                                             | MGC84640 protein OS=Xenopus laevis GN=znf484 PE=2 §         | 7.60 |     | 1 | 1 | 1 | 1  |
| 857 | Q4V7J4                                             | MGC115652 protein OS=Xenopus laevis GN=MGC115652            | 7.59 |     | 1 | 1 | 1 | 1  |
| 858 | dsrrswapns_comp212910_c2_seq5                      | len=1878                                                    | 7.58 |     | 2 | 1 | 1 | 3  |
| 859 | A5PKN2                                             | LOC100101285 protein (Fragment) OS=Xenopus laevis GN        | 7.56 |     | 1 | 1 | 1 | 1  |
| 860 | Q8AVR4                                             | Programmed cell death protein 10 OS=Xenopus laevis GN=      | 7.55 |     | 1 | 1 | 1 | 1  |
| 861 | Q6GQ40;CL5428Contig3                               | Proteasome subunit beta type OS=Xenopus laevis GN=psn       | 7.54 |     | 3 | 1 | 1 | 3  |
| 862 | Q661Y6;CL4803Contig1                               | MGC84052 protein OS=Xenopus laevis GN=psmd7 PE=2 §          | 7.50 |     | 5 | 1 | 1 | 8  |
| 863 | Q6NTP6                                             | Psm2 protein OS=Xenopus laevis GN=psmd2 PE=2 SV=1           | 7.47 |     | 6 | 3 | 3 | 32 |
| 864 | dsrrswapns_comp214578_c4_seq1                      | len=1260                                                    | 7.44 |     | 2 | 1 | 1 | 2  |
| 865 | Q66J64                                             | MGC81783 protein OS=Xenopus laevis GN=fam222b PE=2          | 7.44 |     | 1 | 1 | 1 | 1  |
| 866 | Q67FQ3                                             | Low density lipoprotein receptor adapter protein 1-B OS=Xe  | 7.44 |     | 1 | 1 | 1 | 1  |
| 867 | Q9IAB1                                             | Putative uncharacterized protein (Fragment) OS=Xenopus l    | 7.44 |     | 3 | 1 | 1 | 1  |
| 868 | Q7SZ14                                             | MGC64316 protein OS=Xenopus laevis GN=ndufa9 PE=2 §         | 7.43 |     | 3 | 2 | 2 | 4  |
| 869 | B1NA55                                             | FcR-like protein (Fragment) OS=Xenopus laevis GN=XFL1.      | 7.42 | 256 |   | 1 | 2 | 2  |
| 870 | CL16239Contig1                                     | CL16239Contig1                                              | 7.41 |     | 1 | 1 | 1 | 1  |
| 871 | Q6PB20;CL2763Contig1                               | MGC68482 protein OS=Xenopus laevis GN=bace2 PE=2 S          | 7.41 |     | 1 | 1 | 1 | 4  |
| 872 | dsrrswapns_comp193427_c0_seq1                      | len=532                                                     | 7.41 |     | 1 | 1 | 1 | 1  |
| 873 | Q7ZXM6                                             | Sfrp2-prov protein OS=Xenopus laevis GN=sfrp2 PE=2 SV=      | 7.38 |     | 1 | 1 | 1 | 1  |
| 874 | Q6DJP0;CL2037Contig1                               | LOC100137615 protein OS=Xenopus laevis GN=gclc PE=2         | 7.38 | 252 |   | 1 | 2 | 3  |
| 875 | Q6NTJ0                                             | LOC414678 protein (Fragment) OS=Xenopus laevis GN=L         | 7.38 |     | 8 | 1 | 1 | 5  |
| 876 | Q6DDQ5                                             | Protein phosphatase 1 regulatory subunit 3C OS=Xenopus      | 7.36 |     | 2 | 1 | 1 | 1  |
| 877 | A5PKR6                                             | LOC100101313 protein OS=Xenopus laevis GN=crym PE=          | 7.35 |     | 2 | 1 | 1 | 1  |
| 878 | TC441790 homologue to UniRef100_Q0D2D3 Cluster: F  | Rep: Fry protein - Xenopus tropicalis (Western clawed frog) | 7.35 |     | 1 | 1 | 1 | 1  |
| 879 | B7ZRN2                                             | Putative uncharacterized protein OS=Xenopus laevis PE=2     | 7.33 |     | 2 | 1 | 1 | 1  |
| 880 | dsrrswapns_comp217423_c2_seq11                     | len=1879                                                    | 7.32 |     | 2 | 1 | 1 | 2  |
| 881 | TC445670 homologue to UniRef100_Q6NX33 Cluster: M  | Rep: Myosin heavy chain - Xenopus tropicalis (Western clai  | 7.31 |     | 3 | 1 | 1 | 1  |
| 882 | A1L2S7                                             | LOC100036938 protein OS=Xenopus laevis GN=LOC1000:          | 7.30 |     | 2 | 1 | 1 | 1  |
| 883 | Q52KW6;TC418765 UniRef100_Q52KW6 Cluster: MGC1     | MGC115285 protein OS=Xenopus laevis GN=MGC115285            | 7.27 |     | 1 | 1 | 1 | 2  |
| 884 | Q6DKC0;CL24Contig3                                 | Erlin-2-B OS=Xenopus laevis GN=erlin2-b PE=2 SV=1 -  E      | 7.27 |     | 3 | 2 | 2 | 6  |
| 885 | CL5779Contig1                                      | CL5779Contig1                                               | 7.26 |     | 1 | 1 | 1 | 1  |
| 886 | Q6DEC9;CL9001Contig1                               | D-tyrosyl-tRNA(Tyr) deacylase OS=Xenopus laevis GN=dtc      | 7.25 |     | 1 | 1 | 1 | 2  |
| 887 | B7ZR33                                             | GATA binding factor-1 OS=Xenopus laevis GN=gata1a-A P       | 7.24 |     | 2 | 1 | 1 | 1  |
| 888 | Q640X7                                             | MGC84330 protein OS=Xenopus laevis GN=capns1 PE=2 :         | 7.23 |     | 1 | 1 | 1 | 1  |
| 889 | Q6GM94;CL4854Contig2                               | MGC68458 protein OS=Xenopus laevis GN=abat PE=2 SV          | 7.20 |     | 3 | 1 | 2 | 17 |
| 890 | TC435750 homologue to UniRef100_O93522 Cluster: No | Rep: Nonmuscle myosin II heavy chain A - Xenopus laevis     | 7.20 |     | 1 | 1 | 1 | 3  |
| 891 | Q6GPB1;CL1907Contig3                               | MGC80559 protein OS=Xenopus laevis GN=ammecr11 PE=          | 7.19 | 227 |   | 1 | 2 | 4  |
| 892 | Q6AZJ6                                             | Fascin (Fragment) OS=Xenopus laevis GN=FSCN1 PE=2 §         | 7.17 |     | 7 | 2 | 2 | 7  |
| 893 | Q7ZXX4;CL6920Contig1                               | MGC52697 protein OS=Xenopus laevis GN=aldh9a1 PE=2          | 7.14 |     | 1 | 2 | 2 | 9  |
| 894 | Q5U4W0;CL2471Contig1                               | Entpd4 protein OS=Xenopus laevis GN=entpd4 PE=2 SV=1        | 7.14 |     | 4 | 2 | 2 | 6  |
| 895 | Q7ZX74                                             | MGC53501 protein OS=Xenopus laevis GN=ccdc6 PE=2 S          | 7.13 | 292 |   | 1 | 2 | 2  |
| 896 | Q2TAS0                                             | MGC130982 protein OS=Xenopus laevis GN=tjap1 PE=2 S         | 7.12 |     | 1 | 1 | 1 | 4  |
| 897 | A9ULW5;CL11158Contig1                              | LOC100137631 protein OS=Xenopus laevis GN=acot13 PE         | 7.09 |     | 1 | 1 | 1 | 5  |
| 898 | Q7T0V9                                             | MGC68941 protein OS=Xenopus laevis GN=asb12.2 PE=2          | 7.07 |     | 1 | 1 | 1 | 1  |
| 899 | zeinaSSns_comp388666_c2_seq5                       | len=2890                                                    | 7.06 |     | 3 | 1 | 1 | 8  |
| 900 | CL1907Contig1                                      | CL1907Contig1                                               | 7.06 |     | 1 | 1 | 1 | 3  |
| 901 | Q6GP54                                             | LOC443639 protein (Fragment) OS=Xenopus laevis GN=L         | 7.02 |     | 2 | 1 | 1 | 1  |
| 902 | Q68FK6                                             | MGC82138 protein OS=Xenopus laevis GN=arfgap2 PE=2          | 7.02 |     | 1 | 1 | 1 | 1  |
| 903 | Q7ZWU1;CL4166Contig1                               | Stip1-prov protein OS=Xenopus laevis GN=stip1 PE=2 SV=      | 7.00 |     | 2 | 2 | 2 | 8  |
| 904 | CL1396Contig2                                      | CL1396Contig2                                               | 7.00 |     | 1 | 1 | 1 | 1  |
| 905 | Q66KZ8                                             | Glutathione S-transferase (Fragment) OS=Xenopus laevis      | 6.98 |     | 3 | 1 | 1 | 2  |
| 906 | Q6DDM7;CL6675Contig1                               | Acad1-prov protein OS=Xenopus laevis GN=acad1 PE=2 SV       | 6.98 |     | 1 | 2 | 2 | 12 |
| 907 | A0JPH8;CL13915Contig1                              | LOC100036800 protein OS=Xenopus laevis GN=LOC1000:          | 6.97 |     | 1 | 2 | 2 | 50 |
| 908 | zeinaSSns_comp381925_c1_seq1                       | len=669                                                     | 6.97 |     | 2 | 1 | 1 | 1  |
| 909 | Q6GND5                                             | MGC82876 protein OS=Xenopus laevis GN=dnajb12 PE=2          | 6.97 |     | 1 | 1 | 1 | 1  |
| 910 | Q6IRP2;CL11620Contig1                              | MGC83164 protein OS=Xenopus laevis GN=MGC83164 PE           | 6.96 |     | 2 | 2 | 2 | 12 |
| 911 | Q6GM59;CL3818Contig1                               | Monocarboxylate transporter 12 OS=Xenopus laevis GN=sl      | 6.96 |     | 2 | 1 | 1 | 2  |
| 912 | Q3KPT7                                             | 3-hydroxybutyrate dehydrogenase type 2 OS=Xenopus lae       | 6.94 |     | 2 | 1 | 1 | 1  |
| 913 | B7ZS08                                             | Ago61 protein OS=Xenopus laevis GN=ago61 PE=2 SV=1          | 6.92 |     | 2 | 1 | 1 | 1  |
| 914 | Q5XGQ2                                             | LOC495169 protein OS=Xenopus laevis GN=pdia4 PE=2 S         | 6.91 |     | 3 | 3 | 3 | 12 |
| 915 | Q6GPB7                                             | 4-hydroxyphenylpyruvate dioxygenase OS=Xenopus laevis       | 6.91 |     | 1 | 1 | 1 | 1  |
| 916 | CL5205Contig2                                      | CL5205Contig2                                               | 6.90 |     | 3 | 2 | 2 | 3  |
| 917 | CL7679Contig1                                      | CL7679Contig1                                               | 6.89 |     | 1 | 1 | 1 | 1  |
| 918 | Q2TAD9                                             | Cysteine and histidine-rich protein 1-B OS=Xenopus laevis   | 6.85 |     | 1 | 1 | 1 | 1  |
| 919 | Q3KPV4;CL10181Contig1                              | Transmembrane and ubiquitin-like domain-containing protei   | 6.82 |     | 1 | 1 | 1 | 4  |
| 920 | CL12947Contig1                                     | CL12947Contig1                                              | 6.81 |     | 2 | 1 | 1 | 2  |
| 921 | Q6DD25                                             | UBXD2 protein (Fragment) OS=Xenopus laevis GN=UBXD:         | 6.78 |     | 1 | 1 | 1 | 1  |
| 922 | Q91685                                             | Homeobox protein Mix.2 OS=Xenopus laevis GN=mix-b PE        | 6.78 | 227 |   | 1 | 2 | 2  |
| 923 | Q6DDP5                                             | Ola1 protein OS=Xenopus laevis GN=ola1 PE=2 SV=1 -  Q       | 6.76 |     | 2 | 1 | 1 | 1  |
| 924 | Q5U576;CL11909Contig1                              | LOC495345 protein OS=Xenopus laevis GN=gpr85 PE=2 S         | 6.76 | 227 |   | 1 | 2 | 3  |
| 925 | B7ZRR5                                             | Xebf-3 protein OS=Xenopus laevis GN=Xebf-3 PE=2 SV=1        | 6.70 |     | 2 | 1 | 1 | 1  |
| 926 | CL303Contig2                                       | CL303Contig2                                                | 6.70 |     | 2 | 1 | 3 | 12 |
| 927 | dsrrswapns_comp205246_c0_seq2                      | len=1846                                                    | 6.69 |     | 1 | 1 | 1 | 1  |
| 928 | Q6DFI3                                             | Tst-prov protein OS=Xenopus laevis GN=mpst PE=2 SV=1        | 6.69 |     | 1 | 1 | 1 | 1  |
| 929 | dsrrswapns_comp188169_c1_seq1                      | len=2289                                                    | 6.67 |     | 1 | 1 | 1 | 4  |
| 930 | dsrrswapns_comp203662_c1_seq1                      | len=998                                                     | 6.67 |     | 1 | 1 | 1 | 1  |
| 931 | zeinaSSns_comp375133_c1_seq1                       | len=290                                                     | 6.67 |     | 2 | 1 | 1 | 1  |
| 932 | A2VD74                                             | LOC100037179 protein OS=Xenopus laevis GN=mep1a PE          | 6.67 |     | 1 | 1 | 1 | 1  |
| 933 | Q6GQH7                                             | Putative uncharacterized protein (Fragment) OS=Xenopus l    | 6.67 |     | 2 | 1 | 1 | 1  |
| 934 | Q5XH63;CL3193Contig1                               | LOC495055 protein OS=Xenopus laevis GN=LOC495055 F          | 6.60 |     | 4 | 1 | 1 | 19 |
| 935 | CX133552 homologue to UniRef100_UPI00004D5784 Cl   | Rep: Uncharacterized protein C21orf59. - Xenopus tropicali  | 6.60 |     | 1 | 1 | 1 | 1  |
| 936 | Q5PQ95;CL11117Contig1                              | LOC495941 protein OS=Xenopus laevis GN=LOC495941 F          | 6.58 |     | 1 | 2 | 2 | 3  |
| 937 | Q4KLA5                                             | MGC84800 protein OS=Xenopus laevis GN=MGC84800 PE           | 6.58 |     | 3 | 1 | 1 | 1  |

|      |                                                                                                               |                                                                                          |      |     |   |   |    |
|------|---------------------------------------------------------------------------------------------------------------|------------------------------------------------------------------------------------------|------|-----|---|---|----|
| 938  | Q9J9L2                                                                                                        | Cbl proto-oncogene protein (Fragment) OS=Xenopus laevis                                  | 6.55 | 1   | 1 | 1 | 1  |
| 939  | CL7498Contig1                                                                                                 | CL7498Contig1                                                                            | 6.54 | 2   | 2 | 2 | 9  |
| 940  | Q801S7                                                                                                        | Uba1a protein OS=Xenopus laevis GN=uba1a PE=2 SV=1                                       | 6.52 | 7   | 2 | 3 | 6  |
| 941  | Q6PAW6                                                                                                        | MGC68638 protein OS=Xenopus laevis GN=MGC68638 PE=2 SV=1                                 | 6.52 | 252 | 1 | 2 | 2  |
| 942  | Q7ZY92                                                                                                        | Lect1-prov protein OS=Xenopus laevis GN=lect1 PE=2 SV=1                                  | 6.51 | 3   | 1 | 1 | 1  |
| 943  | Q6INQ1;CL8291Contig1                                                                                          | MGC81422 protein OS=Xenopus laevis GN=bysl PE=2 SV=1                                     | 6.50 | 1   | 1 | 1 | 4  |
| 944  | Q6INM6;CL1435Contig4                                                                                          | MGC82347 protein OS=Xenopus laevis GN=MGC82347 PE=2 SV=1                                 | 6.48 | 1   | 1 | 1 | 4  |
| 945  | CL25284Contig1                                                                                                | CL25284Contig1                                                                           | 6.43 | 1   | 1 | 1 | 1  |
| 946  | Q6GPL5                                                                                                        | MGC83562 protein OS=Xenopus laevis GN=atpbd4 PE=2 SV=1                                   | 6.42 | 1   | 1 | 1 | 2  |
| 947  | Q6GLL5;CL9439Contig2                                                                                          | MGC84748 protein OS=Xenopus laevis GN=fgl1 PE=2 SV=1                                     | 6.39 | 1   | 1 | 1 | 3  |
| 948  | CL37975Contig1                                                                                                | CL37975Contig1                                                                           | 6.38 | 1   | 1 | 1 | 1  |
| 949  | Q52KZ3                                                                                                        | LOC733223 protein (Fragment) OS=Xenopus laevis GN=LOC733223                              | 6.38 | 1   | 1 | 1 | 1  |
| 950  | CL43176Contig1                                                                                                | CL43176Contig1                                                                           | 6.36 | 1   | 1 | 1 | 1  |
| 951  | Q8AVH1;CL1313Contig1                                                                                          | Histone-binding protein RBBP7 OS=Xenopus laevis GN=rbbp7                                 | 6.35 | 5   | 1 | 1 | 4  |
| 952  | Q2VPH6                                                                                                        | LOC432342 protein OS=Xenopus laevis GN=cops2 PE=2 SV=1                                   | 6.32 | 252 | 1 | 2 | 2  |
| 953  | CL9635Contig1                                                                                                 | CL9635Contig1                                                                            | 6.31 | 1   | 1 | 1 | 1  |
| 954  | dsrrswapns_comp21360_c1_seq1                                                                                  | len=389                                                                                  | 6.31 | 1   | 1 | 1 | 1  |
| 955  | Q2TAH7;CL1661Contig1                                                                                          | Putative uncharacterized protein OS=Xenopus laevis PE=2 SV=1                             | 6.30 | 2   | 1 | 1 | 2  |
| 956  | Q6DE60;CL1365Contig1                                                                                          | Adenylyl cyclase-associated protein OS=Xenopus laevis GN=acp                             | 6.30 | 4   | 2 | 2 | 13 |
| 957  | dsrrswapns_comp216720_c1_seq1                                                                                 | len=1088                                                                                 | 6.28 | 1   | 1 | 1 | 1  |
| 958  | TC443718 homologue to UniRef100_Q5BJ90 Cluster: Wdr12 protein - Xenopus tropicalis (Western clawed frog)      | Rep: Wdr12 protein - Xenopus tropicalis (Western clawed frog)                            | 6.28 | 1   | 1 | 1 | 1  |
| 959  | Q5RJJW9                                                                                                       | LOC495833 protein OS=Xenopus laevis GN=ptcd1 PE=2 SV=1                                   | 6.26 | 1   | 1 | 1 | 1  |
| 960  | I3PB85;CL26Contig14                                                                                           | IFN-gamma-inducible-lysosomal thiol reductase OS=Xenopus laevis GN=ifit1                 | 6.25 | 2   | 1 | 1 | 92 |
| 961  | dsrrswapns_comp216167_c0_seq12                                                                                | len=818                                                                                  | 6.25 | 5   | 1 | 1 | 27 |
| 962  | Q5XGZ4                                                                                                        | LOC779025 protein (Fragment) OS=Xenopus laevis GN=LOC779025                              | 6.25 | 232 | 1 | 3 | 8  |
| 963  | Q6DFI0                                                                                                        | MGC83110 protein OS=Xenopus laevis GN=MGC83110 PE=2 SV=1                                 | 6.23 | 3   | 2 | 2 | 3  |
| 964  | B7ZRS3                                                                                                        | Forkhead box transcription factor OS=Xenopus laevis GN=foxo1                             | 6.23 | 2   | 1 | 1 | 1  |
| 965  | Q7ZWN1                                                                                                        | Inosine-5'-monophosphate dehydrogenase A OS=Xenopus laevis GN=imdh                       | 6.23 | 1   | 1 | 1 | 1  |
| 966  | dsrrswapns_comp191560_c0_seq2                                                                                 | len=1371                                                                                 | 6.23 | 1   | 1 | 1 | 1  |
| 967  | Q63ZK5                                                                                                        | LOC494824 protein (Fragment) OS=Xenopus laevis GN=LOC494824                              | 6.23 | 2   | 1 | 1 | 1  |
| 968  | F6KDD5                                                                                                        | NADH dehydrogenase subunit 1 OS=Xenopus laevis GN=nd1                                    | 6.21 | 2   | 1 | 1 | 2  |
| 969  | Q8AVM7                                                                                                        | Basic leucine zipper and W2 domain-containing protein 1 OS=Xenopus laevis GN=blz1        | 6.21 | 1   | 1 | 1 | 1  |
| 970  | Q498L1;CL2523Contig1                                                                                          | MGC114631 protein OS=Xenopus laevis GN=MGC114631                                         | 6.20 | 7   | 3 | 3 | 18 |
| 971  | Q32NL8                                                                                                        | MGC131051 protein OS=Xenopus laevis GN=slc3a1 PE=2 SV=1                                  | 6.20 | 1   | 1 | 1 | 2  |
| 972  | CL8769Contig1                                                                                                 | CL8769Contig1                                                                            | 6.18 | 1   | 1 | 1 | 1  |
| 973  | Q66J07;CL542Contig7                                                                                           | MGC83563 protein OS=Xenopus laevis GN=nnt PE=2 SV=1                                      | 6.17 | 2   | 3 | 3 | 18 |
| 974  | Q5PPT3                                                                                                        | ATP-dependent Clp protease proteolytic subunit (Fragment) OS=Xenopus laevis GN=clpP      | 6.17 | 4   | 1 | 1 | 2  |
| 975  | CL9347Contig1                                                                                                 | CL9347Contig1                                                                            | 6.16 | 1   | 2 | 2 | 4  |
| 976  | Q32NS7;CL1Contig287                                                                                           | MGC52825 protein OS=Xenopus laevis GN=hmgb2 PE=2 SV=1                                    | 6.16 | 16  | 1 | 1 | 14 |
| 977  | Q6GLS2                                                                                                        | MGC84319 protein OS=Xenopus laevis GN=tcp1111 PE=2 SV=1                                  | 6.15 | 1   | 1 | 1 | 1  |
| 978  | P43695                                                                                                        | GATA-binding factor 5-A OS=Xenopus laevis GN=gata5-a                                     | 6.15 | 1   | 1 | 1 | 1  |
| 979  | Q66IS8;CL11862Contig1                                                                                         | Transmembrane protein 177 OS=Xenopus laevis GN=tmem177                                   | 6.13 | 2   | 1 | 1 | 3  |
| 980  | Q6NUD2                                                                                                        | MGC81047 protein OS=Xenopus laevis GN=dtymk PE=2 SV=1                                    | 6.13 | 2   | 1 | 1 | 2  |
| 981  | Q802B6;CL539Contig1                                                                                           | Add1-a protein OS=Xenopus laevis GN=add1 PE=2 SV=1                                       | 6.13 | 2   | 1 | 1 | 3  |
| 982  | CL10114Contig2                                                                                                | CL10114Contig2                                                                           | 6.13 | 1   | 1 | 1 | 1  |
| 983  | Q3KPK3;CL25783Contig1                                                                                         | Putative uncharacterized protein OS=Xenopus laevis PE=2 SV=1                             | 6.12 | 4   | 2 | 2 | 6  |
| 984  | Q4V7W5                                                                                                        | Polyhomeotic-like protein 2 OS=Xenopus laevis GN=phc2                                    | 6.10 | 1   | 1 | 1 | 1  |
| 985  | Q6IRQ1                                                                                                        | 70 kDa peroxisomal membrane protein OS=Xenopus laevis GN=pm70                            | 6.09 | 1   | 1 | 1 | 1  |
| 986  | A1L3F5                                                                                                        | C-Maf-inducing protein OS=Xenopus laevis GN=cmip PE=2 SV=1                               | 6.09 | 1   | 2 | 2 | 4  |
| 987  | Q91717;CL120Contig7                                                                                           | Collagen alpha-1(II) chain OS=Xenopus laevis GN=col2a1                                   | 6.06 | 3   | 2 | 3 | 7  |
| 988  | Q0IHC8                                                                                                        | MGC115147 protein OS=Xenopus laevis GN=vps37a PE=2 SV=1                                  | 6.05 | 1   | 1 | 1 | 1  |
| 989  | Q3KPW6                                                                                                        | LOC733370 protein (Fragment) OS=Xenopus laevis GN=LOC733370                              | 6.03 | 1   | 1 | 1 | 1  |
| 990  | CL10840Contig1                                                                                                | CL10840Contig1                                                                           | 6.02 | 2   | 1 | 1 | 2  |
| 991  | CL2715Contig5                                                                                                 | CL2715Contig5                                                                            | 6.02 | 1   | 1 | 1 | 1  |
| 992  | A2VDD0                                                                                                        | LOC100037222 protein (Fragment) OS=Xenopus laevis GN=LOC100037222                        | 6.00 | 3   | 1 | 3 | 37 |
| 993  | Q5XH25                                                                                                        | Malic enzyme OS=Xenopus laevis GN=me2 PE=2 SV=1                                          | 6.00 | 6   | 1 | 2 | 7  |
| 994  | Q2TAE3                                                                                                        | Dual specificity tyrosine-phosphorylation-regulated kinase 1 OS=Xenopus laevis GN=dsprk1 | 6.00 | 1   | 1 | 1 | 1  |
| 995  | CL246Contig8                                                                                                  | CL246Contig8                                                                             | 5.95 | 3   | 1 | 1 | 1  |
| 996  | Q91560                                                                                                        | RNA exonuclease 4 OS=Xenopus laevis GN=rexo4 PE=2 SV=1                                   | 5.94 | 1   | 1 | 1 | 1  |
| 997  | dsrrswapns_comp200264_c1_seq2                                                                                 | len=934                                                                                  | 5.91 | 1   | 1 | 1 | 2  |
| 998  | CL16756Contig1                                                                                                | CL16756Contig1                                                                           | 5.90 | 1   | 1 | 1 | 1  |
| 999  | Q06271                                                                                                        | Integrin alpha 2 subunit (Fragment) OS=Xenopus laevis GN=itga2                           | 5.90 | 1   | 1 | 1 | 1  |
| 1000 | Q91573                                                                                                        | Mineralocorticoid receptor (Fragment) OS=Xenopus laevis GN=mr                            | 5.88 | 2   | 1 | 1 | 1  |
| 1001 | Q6NRR6                                                                                                        | MGC82267 protein OS=Xenopus laevis GN=MGC82267 PE=2 SV=1                                 | 5.87 | 2   | 1 | 1 | 1  |
| 1002 | CL6870Contig2                                                                                                 | CL6870Contig2                                                                            | 5.86 | 1   | 1 | 1 | 1  |
| 1003 | Q6NTL5;CL6428Contig2                                                                                          | MGC83205 protein OS=Xenopus laevis GN=cog6 PE=2 SV=1                                     | 5.86 | 254 | 1 | 2 | 3  |
| 1004 | Q4V813;CL6656Contig1                                                                                          | Adh3 protein OS=Xenopus laevis GN=adh5 PE=2 SV=1                                         | 5.85 | 2   | 1 | 1 | 4  |
| 1005 | Q4KL87                                                                                                        | MGC116558 protein OS=Xenopus laevis GN=pde9a PE=2 SV=1                                   | 5.85 | 1   | 1 | 1 | 2  |
| 1006 | Q7SYV2                                                                                                        | MGC64465 protein OS=Xenopus laevis GN=pdlim1 PE=2 SV=1                                   | 5.85 | 1   | 1 | 1 | 1  |
| 1007 | Q6PCI1                                                                                                        | MGC68997 protein OS=Xenopus laevis GN=nadk PE=2 SV=1                                     | 5.84 | 2   | 1 | 1 | 1  |
| 1008 | Q6GNP1;CL9567Contig1                                                                                          | MGC80975 protein OS=Xenopus laevis GN=dnai1 PE=2 SV=1                                    | 5.84 | 1   | 1 | 1 | 2  |
| 1009 | Q7ZTM4;CL120Contig1                                                                                           | Col2a1b protein OS=Xenopus laevis GN=col2a1b PE=2 SV=1                                   | 5.84 | 4   | 1 | 3 | 6  |
| 1010 | TC457582 similar to UniRef100_UPI00006A00F2 Cluster: Serum amyloid P-component precursor (SAP) (9.5S subunit) | Rep: Serum amyloid P-component precursor (SAP) (9.5S subunit)                            | 5.83 | 1   | 1 | 1 | 1  |
| 1011 | Q7SYS0                                                                                                        | Gst13-13-prov protein OS=Xenopus laevis GN=gstk1 PE=2 SV=1                               | 5.82 | 1   | 1 | 1 | 1  |
| 1012 | A4FVE9                                                                                                        | LOC100049132 protein (Fragment) OS=Xenopus laevis GN=LOC100049132                        | 5.82 | 3   | 1 | 1 | 2  |
| 1013 | Q7ZTM9;CL5086Contig1                                                                                          | Eukaryotic translation initiation factor 3 subunit D OS=Xenopus laevis GN=eif3d          | 5.82 | 253 | 1 | 2 | 5  |
| 1014 | CL620Contig2                                                                                                  | CL620Contig2                                                                             | 5.80 | 1   | 1 | 1 | 1  |
| 1015 | CL9481Contig1                                                                                                 | CL9481Contig1                                                                            | 5.79 | 2   | 1 | 1 | 2  |
| 1016 | A5D8L8                                                                                                        | LOC100049741 protein (Fragment) OS=Xenopus laevis GN=LOC100049741                        | 5.78 | 1   | 1 | 1 | 1  |
| 1017 | Q4V837                                                                                                        | Denticleless protein homolog A OS=Xenopus laevis GN=dtl                                  | 5.77 | 1   | 1 | 1 | 1  |
| 1018 | Q5U511                                                                                                        | LOC495400 protein OS=Xenopus laevis GN=vapb PE=2 SV=1                                    | 5.76 | 2   | 1 | 1 | 1  |
| 1019 | CL5041Contig1                                                                                                 | CL5041Contig1                                                                            | 5.75 | 2   | 1 | 1 | 1  |
| 1020 | Q7T3S2;CL2215Contig4                                                                                          | PP2A B" subunit PR74 OS=Xenopus laevis GN=ppp2r3a                                        | 5.75 | 229 | 1 | 2 | 3  |
| 1021 | CL6998Contig1                                                                                                 | CL6998Contig1                                                                            | 5.73 | 3   | 1 | 1 | 1  |
| 1022 | Q7SYV4                                                                                                        | Vbp1-prov protein OS=Xenopus laevis GN=vbp1 PE=2 SV=1                                    | 5.73 | 1   | 1 | 1 | 1  |
| 1023 | Q9I905;CL4858Contig1                                                                                          | MGC64562 protein OS=Xenopus laevis GN=mtch2 PE=2 SV=1                                    | 5.72 | 2   | 1 | 1 | 4  |

|      |                                                      |                                                            |      |     |   |   |   |    |
|------|------------------------------------------------------|------------------------------------------------------------|------|-----|---|---|---|----|
| 1024 | Q7ZXP5                                               | Mct3-prov protein OS=Xenopus laevis GN=slc16a3 PE=2 S      | 5.72 |     | 1 | 1 | 1 | 1  |
| 1025 | Q6NRP6                                               | Tudor domain-containing protein 3 OS=Xenopus laevis GN=    | 5.69 |     | 2 | 2 | 2 | 2  |
| 1026 | Q7ZTP9;CL8426Contig1                                 | Slc25a20-prov protein OS=Xenopus laevis GN=slc25a20 P      | 5.65 |     | 1 | 1 | 1 | 4  |
| 1027 | Q6GLT3                                               | MGC84278 protein OS=Xenopus laevis GN=igsf21 PE=2 S        | 5.63 |     | 1 | 1 | 1 | 1  |
| 1028 | Q5PQ40                                               | LOC495989 protein OS=Xenopus laevis GN=tx26 PE=2 S         | 5.63 |     | 1 | 1 | 1 | 1  |
| 1029 | Q7ZX99                                               | Tia1 protein (Fragment) OS=Xenopus laevis GN=Tia1 PE=      | 5.62 |     | 1 | 1 | 1 | 1  |
| 1030 | O93522;CL47Contig4                                   | Nonmuscle myosin II heavy chain A OS=Xenopus laevis G      | 5.60 | 12  |   | 4 | 6 | 21 |
| 1031 | dsrrswapns_comp216492_c2_seq6                        | len=2704                                                   | 5.59 |     | 2 | 1 | 1 | 1  |
| 1032 | CL2670Contig1                                        | CL2670Contig1                                              | 5.57 |     | 3 | 1 | 1 | 1  |
| 1033 | Q8AVC0                                               | Shmt1 protein OS=Xenopus laevis GN=shmt1 PE=2 SV=1         | 5.57 |     | 1 | 1 | 1 | 1  |
| 1034 | Q08B79                                               | LOC733250 protein (Fragment) OS=Xenopus laevis GN=L        | 5.55 |     | 3 | 3 | 3 | 13 |
| 1035 | Q9IBC8                                               | T-box transcription factor TBX2-A OS=Xenopus laevis GN=    | 5.52 |     | 4 | 1 | 1 | 5  |
| 1036 | CL6788Contig2                                        | CL6788Contig2                                              | 5.49 |     | 1 | 1 | 1 | 1  |
| 1037 | CL12Contig33                                         | CL12Contig33                                               | 5.49 |     | 4 | 1 | 1 | 1  |
| 1038 | dsrrswapns_comp209374_c3_seq2                        | len=1195                                                   | 5.48 |     | 1 | 1 | 1 | 2  |
| 1039 | dsrrswapns_comp213553_c0_seq7                        | len=1469                                                   | 5.45 |     | 4 | 1 | 1 | 1  |
| 1040 | Q5XHE6                                               | LOC495021 protein OS=Xenopus laevis GN=LOC495021 F         | 5.42 |     | 2 | 1 | 1 | 1  |
| 1041 | Q640W9                                               | MGC84396 protein OS=Xenopus laevis GN=MGC84396 P           | 5.42 |     | 1 | 1 | 1 | 1  |
| 1042 | Q66J72                                               | MGC81721 protein OS=Xenopus laevis GN=pvri2 PE=2 SV        | 5.40 |     | 3 | 1 | 1 | 1  |
| 1043 | Q5XGW1;CL14714Contig1                                | LOC495263 protein OS=Xenopus laevis GN=atp5g1 PE=2         | 5.38 |     | 8 | 1 | 1 | 5  |
| 1044 | Q6DFK1                                               | Pex12-prov protein OS=Xenopus laevis GN=pex12 PE=2 S       | 5.38 |     | 1 | 1 | 1 | 1  |
| 1045 | CL6622Contig2                                        | CL6622Contig2                                              | 5.37 |     | 1 | 1 | 1 | 2  |
| 1046 | Q6NRC5;zeinaSSns_comp387749_c1_seq4                  | MGC83936 protein OS=Xenopus laevis GN=dync1i2 PE=2         | 5.34 | 11  |   | 1 | 1 | 4  |
| 1047 | Q6PA32                                               | MGC86867 protein OS=Xenopus laevis GN=slco2a1 PE=2         | 5.34 |     | 1 | 2 | 2 | 2  |
| 1048 | CL10567Contig1                                       | CL10567Contig1                                             | 5.32 |     | 2 | 1 | 1 | 2  |
| 1049 | CL2732Contig1                                        | CL2732Contig1                                              | 5.31 |     | 2 | 1 | 1 | 1  |
| 1050 | Q6GLY5                                               | Protein asunder homolog OS=Xenopus laevis GN=asun PE       | 5.31 |     | 1 | 1 | 1 | 1  |
| 1051 | Q4QR55                                               | VgRBP60 protein OS=Xenopus laevis GN=VgRBP60 PE=2          | 5.30 |     | 2 | 1 | 1 | 2  |
| 1052 | Q5BL86                                               | MGC85088 protein OS=Xenopus laevis GN=blmh PE=2 SV         | 5.30 |     | 1 | 1 | 1 | 1  |
| 1053 | Q501Q2                                               | Putative uncharacterized protein OS=Xenopus laevis PE=2    | 5.30 |     | 3 | 1 | 1 | 1  |
| 1054 | Q01611                                               | Zinc finger Y-chromosomal protein 1 OS=Xenopus laevis G    | 5.29 | 228 |   | 1 | 2 | 3  |
| 1055 | Q6DJJ8                                               | Polr3c-prov protein OS=Xenopus laevis GN=polr3c PE=2 S     | 5.29 |     | 1 | 1 | 1 | 1  |
| 1056 | Q6DE73;CL13437Contig1                                | 2-oxoglutarate and iron-dependent oxygenase domain-cont    | 5.28 |     | 1 | 1 | 1 | 2  |
| 1057 | CL17062Contig1                                       | CL17062Contig1                                             | 5.26 |     | 1 | 1 | 1 | 1  |
| 1058 | P48676                                               | Peripherin OS=Xenopus laevis GN=prph PE=2 SV=1 - [PE       | 5.26 | 291 |   | 1 | 2 | 2  |
| 1059 | A9UM24                                               | Bix1 protein OS=Xenopus laevis GN=Bix1 PE=2 SV=1 - [A      | 5.24 |     | 4 | 1 | 1 | 1  |
| 1060 | Q08B84                                               | E3 ubiquitin-protein ligase RNF19B OS=Xenopus laevis GN    | 5.24 |     | 1 | 1 | 1 | 1  |
| 1061 | CL11742Contig1                                       | CL11742Contig1                                             | 5.23 |     | 1 | 1 | 1 | 1  |
| 1062 | D6C652                                               | Yes-associated protein 65 OS=Xenopus laevis GN=YAP PE      | 5.23 |     | 1 | 1 | 1 | 1  |
| 1063 | CL13645Contig1                                       | CL13645Contig1                                             | 5.22 |     | 1 | 1 | 1 | 1  |
| 1064 | P29540;CL66Contig1                                   | General transcription factor IIE subunit 2 OS=Xenopus laev | 5.21 |     | 1 | 1 | 1 | 32 |
| 1065 | B7ZRZ7                                               | T-box transcription factor Tbx5 OS=Xenopus laevis GN=tbx   | 5.20 |     | 2 | 1 | 1 | 1  |
| 1066 | Q9IAI8                                               | Receptor protein tyrosine phosphatase CRYP-alpha (Fragn    | 5.20 |     | 3 | 1 | 1 | 1  |
| 1067 | Q66IV8;CL2891Contig1                                 | MGC84302 protein OS=Xenopus laevis GN=syn1 PE=2 SV         | 5.19 |     | 1 | 1 | 1 | 2  |
| 1068 | Q7ZYA5;CL6725Contig1                                 | Interferon-inducible double stranded RNA-dependent protei  | 5.18 |     | 4 | 1 | 1 | 2  |
| 1069 | Q6INF1                                               | LOC432253 protein (Fragment) OS=Xenopus laevis GN=L        | 5.18 |     | 3 | 1 | 1 | 1  |
| 1070 | Q6NRH1                                               | DDB1- and CUL4-associated factor 8 OS=Xenopus laevis C     | 5.16 |     | 1 | 1 | 1 | 1  |
| 1071 | Q7ZX22;CL5682Contig1                                 | WD repeat-containing protein 24 OS=Xenopus laevis GN=v     | 5.13 |     | 2 | 1 | 1 | 2  |
| 1072 | Q6GP14                                               | LOC397993 protein OS=Xenopus laevis GN=LOC397993 F         | 5.12 | 252 |   | 1 | 2 | 2  |
| 1073 | Q569T0                                               | MGC115178 protein OS=Xenopus laevis GN=hdac10 PE=2         | 5.12 |     | 1 | 1 | 1 | 1  |
| 1074 | CL1016Contig5                                        | CL1016Contig5                                              | 5.11 |     | 2 | 1 | 1 | 1  |
| 1075 | Q6DDR6                                               | LOC445863 protein (Fragment) OS=Xenopus laevis GN=L        | 5.11 |     | 2 | 2 | 2 | 2  |
| 1076 | Q5I016                                               | LOC496298 protein (Fragment) OS=Xenopus laevis GN=cc       | 5.09 |     | 1 | 1 | 1 | 1  |
| 1077 | CL4060Contig1                                        | CL4060Contig1                                              | 5.06 |     | 1 | 1 | 1 | 1  |
| 1078 | B3IXB3                                               | RAS guanyl releasing protein 2 OS=Xenopus laevis GN=ra     | 5.05 |     | 3 | 1 | 1 | 1  |
| 1079 | CL9187Contig1                                        | CL9187Contig1                                              | 5.04 |     | 1 | 1 | 1 | 12 |
| 1080 | Q7ZX81                                               | MGC54008 protein OS=Xenopus laevis GN=cyp2c8.1 PE=         | 5.04 |     | 1 | 1 | 1 | 1  |
| 1081 | Q6PAZ0                                               | MGC68780 protein OS=Xenopus laevis GN=tomm70a PE=          | 5.03 |     | 1 | 1 | 1 | 1  |
| 1082 | Q6NRT7                                               | MGC81452 protein OS=Xenopus laevis GN=akt1s1 PE=2 S        | 5.02 |     | 1 | 1 | 1 | 2  |
| 1083 | A9JS15                                               | LOC100127283 protein OS=Xenopus laevis GN=fam110d f        | 5.00 |     | 1 | 1 | 1 | 1  |
| 1084 | Q66KT0                                               | MGC85462 protein OS=Xenopus laevis GN=mls PE=2 SV=         | 4.98 |     | 1 | 1 | 1 | 2  |
| 1085 | CL6862Contig2                                        | CL6862Contig2                                              | 4.96 |     | 2 | 1 | 1 | 1  |
| 1086 | CL6316Contig1                                        | CL6316Contig1                                              | 4.93 |     | 3 | 1 | 1 | 1  |
| 1087 | CL1590Contig4                                        | CL1590Contig4                                              | 4.92 |     | 1 | 1 | 1 | 1  |
| 1088 | Q7ZTR0                                               | Wu:fc55e05-prov protein OS=Xenopus laevis GN=copb2 P       | 4.92 |     | 4 | 1 | 1 | 2  |
| 1089 | P30311                                               | M-phase inducer phosphatase 3 OS=Xenopus laevis GN=c       | 4.90 |     | 1 | 1 | 1 | 1  |
| 1090 | Q2VPG9;CL1Contig756                                  | MGC132166 protein OS=Xenopus laevis GN=suclg2 PE=2         | 4.87 |     | 2 | 1 | 1 | 6  |
| 1091 | Q7SYR8                                               | Apacd-prov protein OS=Xenopus laevis GN=txndc9 PE=2 S      | 4.87 |     | 3 | 1 | 1 | 4  |
| 1092 | Q9PWH0                                               | Guanylate cyclase OS=Xenopus laevis GN=XGC-1 PE=2 S        | 4.87 | 483 |   | 1 | 3 | 3  |
| 1093 | Q7SZJ1                                               | Putative OFD1 protein (Fragment) OS=Xenopus laevis PE=     | 4.86 |     | 1 | 1 | 1 | 1  |
| 1094 | B1NA54                                               | Ig-like receptor 2.1 OS=Xenopus laevis GN=xilr2 PE=2 SV=   | 4.84 |     | 2 | 1 | 1 | 3  |
| 1095 | CL12884Contig1                                       | CL12884Contig1                                             | 4.84 |     | 2 | 1 | 1 | 1  |
| 1096 | TC445443 similar to UniRef100_074947 Cluster: Conser | Rep: Conserved fungal protein - Schizosaccharomyces pon    | 4.82 |     | 1 | 1 | 1 | 2  |
| 1097 | B7ZQV9                                               | Frizzled-8 OS=Xenopus laevis GN=xfz8 PE=2 SV=1 - [B7Z      | 4.80 |     | 1 | 1 | 1 | 2  |
| 1098 | zeinaSSns_comp387346_c2_seq2                         | len=1947                                                   | 4.79 |     | 1 | 1 | 1 | 1  |
| 1099 | CL7840Contig1                                        | CL7840Contig1                                              | 4.78 |     | 1 | 1 | 1 | 1  |
| 1100 | Q6P417                                               | MGC68516 protein OS=Xenopus laevis GN=MGC68516 P           | 4.76 |     | 2 | 1 | 1 | 3  |
| 1101 | B1H1N7                                               | Ancient ubiquitous protein 1 OS=Xenopus laevis GN=aup1     | 4.76 | 227 |   | 1 | 2 | 2  |
| 1102 | Q6INJ7                                               | LOC432278 protein (Fragment) OS=Xenopus laevis GN=L        | 4.73 |     | 2 | 1 | 1 | 1  |
| 1103 | dsrrswapns_comp213982_c2_seq3                        | len=3721                                                   | 4.72 |     | 2 | 1 | 1 | 1  |
| 1104 | Q6NUJ42                                              | MGC81264 protein OS=Xenopus laevis GN=MGC81264 P           | 4.71 |     | 1 | 1 | 1 | 1  |
| 1105 | Q6S9C2                                               | Type 7 adenylyl cyclase (Fragment) OS=Xenopus laevis PE    | 4.71 |     | 1 | 1 | 1 | 1  |
| 1106 | A3KNB7                                               | LOC495502 protein OS=Xenopus laevis GN=LOC495502 F         | 4.69 |     | 4 | 1 | 1 | 9  |
| 1107 | CL15462Contig1                                       | CL15462Contig1                                             | 4.68 |     | 1 | 1 | 1 | 1  |
| 1108 | CL3413Contig3                                        | CL3413Contig3                                              | 4.67 |     | 1 | 1 | 1 | 1  |
| 1109 | Q7ZTK1;CL1176Contig2                                 | Slc30a1-prov protein OS=Xenopus laevis GN=slc30a1 PE=      | 4.66 |     | 1 | 1 | 1 | 3  |

|      |                                               |                                                             |      |     |   |   |    |
|------|-----------------------------------------------|-------------------------------------------------------------|------|-----|---|---|----|
| 1110 | zeinaSSns_comp389585_c0_seq2                  | len=3397                                                    | 4.66 | 1   | 1 | 1 | 1  |
| 1111 | Q2TAF7                                        | MGC132159 protein OS=Xenopus laevis GN=cep85 PE=2           | 4.66 | 292 | 1 | 2 | 3  |
| 1112 | Q6PF58                                        | MGC68882 protein OS=Xenopus laevis PE=2 SV=1 - [Q6P         | 4.62 | 3   | 1 | 1 | 1  |
| 1113 | CL3394Contig2                                 | CL3394Contig2                                               | 4.62 | 1   | 1 | 1 | 3  |
| 1114 | Q5M7B8                                        | LOC496249 protein OS=Xenopus laevis GN=aga PE=2 SV          | 4.61 | 1   | 1 | 1 | 1  |
| 1115 | Q6NU56                                        | Methyltransferase-like protein 14 OS=Xenopus laevis GN=r    | 4.61 | 1   | 1 | 1 | 2  |
| 1116 | CL6944Contig2                                 | CL6944Contig2                                               | 4.57 | 2   | 1 | 1 | 1  |
| 1117 | B7ZQE3                                        | Tbx6 protein OS=Xenopus laevis GN=tbx6 PE=2 SV=1 - [B       | 4.55 | 2   | 1 | 1 | 1  |
| 1118 | Q6GQD0                                        | Nuclear cap-binding protein subunit 1-B OS=Xenopus laevi    | 4.55 | 1   | 1 | 1 | 1  |
| 1119 | Q4KLX0;CL907Contig1                           | MGC114675 protein OS=Xenopus laevis GN=atp6v1a PE=          | 4.54 | 3   | 2 | 2 | 12 |
| 1120 | Q6GMY9                                        | Exportin-2 OS=Xenopus laevis GN=cse11 PE=2 SV=1 - [XP       | 4.53 | 6   | 3 | 4 | 20 |
| 1121 | A0JMU8                                        | Protein CASC3 OS=Xenopus laevis GN=casc3 PE=2 SV=1          | 4.52 | 4   | 2 | 2 | 4  |
| 1122 | B7ZQH2                                        | XMam1 protein OS=Xenopus laevis GN=XMam1 PE=2 SV:           | 4.52 | 1   | 1 | 1 | 2  |
| 1123 | Q7T0R2                                        | LOC398682 protein (Fragment) OS=Xenopus laevis GN=L         | 4.51 | 2   | 1 | 1 | 1  |
| 1124 | C8941391 homologue to UniRef100_UPI000069DDBC | Rep: Plakophilin-1 (Band-6 protein) (B6P). - Xenopus tropic | 4.49 | 4   | 1 | 1 | 3  |
| 1125 | Q4V7Z2                                        | MGC114910 protein OS=Xenopus laevis GN=msn PE=2 S           | 4.48 | 2   | 1 | 1 | 1  |
| 1126 | CL1Contig313                                  | CL1Contig313                                                | 4.46 | 2   | 1 | 2 | 9  |
| 1127 | Q6NR12                                        | MGC83797 protein OS=Xenopus laevis GN=klh7 PE=2 SV          | 4.46 | 2   | 1 | 1 | 1  |
| 1128 | P23790                                        | Serum response factor OS=Xenopus laevis GN=srf PE=2 S       | 4.46 | 1   | 1 | 1 | 1  |
| 1129 | CL17976Contig1                                | CL17976Contig1                                              | 4.45 | 1   | 1 | 1 | 1  |
| 1130 | Q9PVQ1                                        | Proteasome subunit alpha type-7-B OS=Xenopus laevis GN      | 4.45 | 2   | 1 | 1 | 1  |
| 1131 | Q7SZ98                                        | Annexin OS=Xenopus laevis PE=2 SV=1 - [Q7SZ98_XENL          | 4.44 | 293 | 1 | 2 | 12 |
| 1132 | Q5I047;CL15637Contig1                         | Protein FAM173B OS=Xenopus laevis GN=fam173b PE=2           | 4.42 | 1   | 1 | 1 | 9  |
| 1133 | CL22667Contig1                                | CL22667Contig1                                              | 4.41 | 1   | 1 | 1 | 1  |
| 1134 | Q7SZT4;CL25746Contig1                         | Rdh1-prov protein OS=Xenopus laevis GN=dhrs9 PE=2 SV:       | 4.40 | 1   | 1 | 1 | 3  |
| 1135 | Q9PTG8                                        | Transforming acidic coiled-coil-containing protein 3 OS=Xer | 4.40 | 1   | 1 | 1 | 1  |
| 1136 | Q6DCL6;CL7918Contig1                          | Protein FAM69A OS=Xenopus laevis GN=fam69a PE=2 SV          | 4.39 | 3   | 1 | 1 | 2  |
| 1137 | Q6GNA9;CL4677Contig2                          | MGC82910 protein OS=Xenopus laevis GN=zeb1 PE=2 SV          | 4.39 | 1   | 2 | 2 | 2  |
| 1138 | A1L2U5                                        | LOC100036956 protein (Fragment) OS=Xenopus laevis GN        | 4.39 | 1   | 1 | 1 | 1  |
| 1139 | H2DQ55                                        | Interferon-gamma (Fragment) OS=Xenopus laevis PE=2 SV       | 4.35 | 1   | 1 | 1 | 1  |
| 1140 | Q7ZYP5                                        | MGC52698 protein OS=Xenopus laevis GN=cirh1a PE=2 S         | 4.35 | 1   | 1 | 1 | 1  |
| 1141 | Q4V847                                        | Integrator complex subunit 8 OS=Xenopus laevis GN=ints8     | 4.34 | 1   | 1 | 1 | 1  |
| 1142 | dsrrswapns_comp205971_c0_seq1                 | len=2542                                                    | 4.34 | 1   | 1 | 1 | 2  |
| 1143 | Q7ZXP0;CL3911Contig1                          | Twinfilin-2-A OS=Xenopus laevis GN=twf2-a PE=2 SV=1 - [     | 4.30 | 2   | 1 | 1 | 2  |
| 1144 | CL14192Contig1                                | CL14192Contig1                                              | 4.29 | 1   | 1 | 1 | 2  |
| 1145 | Q6GQI7;CL3975Contig1                          | Alpha-1,3-mannosyl-glycoprotein 4-beta-N-acetylglucosami    | 4.29 | 2   | 1 | 1 | 2  |
| 1146 | CL4967Contig1                                 | CL4967Contig1                                               | 4.29 | 1   | 1 | 1 | 1  |
| 1147 | Q4V7Q6                                        | Serine/threonine-protein kinase ULK3 OS=Xenopus laevis      | 4.27 | 1   | 1 | 1 | 1  |
| 1148 | Q6XXZ0                                        | Transporter associated with antigen processing 1 OS=Xenc    | 4.27 | 1   | 1 | 1 | 2  |
| 1149 | Q9DDA3                                        | RalB-binding protein (Fragment) OS=Xenopus laevis GN=rl     | 4.26 | 2   | 1 | 1 | 1  |
| 1150 | A9ULW6                                        | ZPD protein OS=Xenopus laevis GN=ZPD PE=2 SV=1 - [A         | 4.26 | 1   | 1 | 1 | 1  |
| 1151 | Q4FZM4                                        | LOC100036775 protein (Fragment) OS=Xenopus laevis GN        | 4.24 | 2   | 1 | 1 | 3  |
| 1152 | P19102                                        | Protein c-ets-2-A OS=Xenopus laevis GN=ets2-a PE=2 SV:      | 4.24 | 1   | 1 | 1 | 1  |
| 1153 | Q0IH66                                        | Ddx10 protein OS=Xenopus laevis GN=ddx10 PE=2 SV=1 -        | 4.22 | 6   | 1 | 1 | 1  |
| 1154 | Q6DCT7                                        | MGC80781 protein OS=Xenopus laevis GN=arhgap30 PE=          | 4.21 | 1   | 2 | 2 | 2  |
| 1155 | Q4KLV8                                        | LOC733291 protein (Fragment) OS=Xenopus laevis GN=L         | 4.19 | 6   | 2 | 2 | 9  |
| 1156 | Q569U3                                        | Fcp1 protein OS=Xenopus laevis GN=fcp1 PE=2 SV=1 - [Q       | 4.19 | 2   | 1 | 1 | 1  |
| 1157 | CL12609Contig1                                | CL12609Contig1                                              | 4.17 | 1   | 1 | 1 | 2  |
| 1158 | Q4V866                                        | MGC114642 protein OS=Xenopus laevis GN=clpx PE=2 SV         | 4.17 | 1   | 1 | 1 | 1  |
| 1159 | CL966Contig1                                  | CL966Contig1                                                | 4.15 | 1   | 1 | 1 | 1  |
| 1160 | Q5XH38;CL4330Contig2                          | LOC495073 protein OS=Xenopus laevis GN=tmem184a PE          | 4.15 | 1   | 1 | 1 | 2  |
| 1161 | Q6NU97;CL5953Contig1                          | MGC81120 protein OS=Xenopus laevis GN=MGC81120 PE           | 4.14 | 4   | 1 | 1 | 3  |
| 1162 | Q32NR8                                        | MGC130896 protein OS=Xenopus laevis GN=ndufs2 PE=2          | 4.14 | 1   | 1 | 1 | 1  |
| 1163 | Q7ZB2;CL6160Contig1                           | PR domain zinc finger protein 4 OS=Xenopus laevis PE=2      | 4.13 | 3   | 1 | 1 | 2  |
| 1164 | zeinaSSns_comp388890_c0_seq6                  | len=1570                                                    | 4.12 | 4   | 1 | 1 | 1  |
| 1165 | Q6GMC8                                        | MGC81877 protein OS=Xenopus laevis GN=nct2 PE=2 SV:         | 4.12 | 1   | 1 | 1 | 1  |
| 1166 | Q6NRD3                                        | E3 ubiquitin-protein ligase SH3RF1 OS=Xenopus laevis GN     | 4.12 | 1   | 1 | 1 | 1  |
| 1167 | Q7ZX27                                        | Palmdelphin OS=Xenopus laevis GN=palmd PE=2 SV=1 - [        | 4.11 | 1   | 1 | 1 | 1  |
| 1168 | Q6NRP9                                        | MGC83117 protein OS=Xenopus laevis GN=ptpn4 PE=2 S          | 4.09 | 6   | 2 | 2 | 2  |
| 1169 | Q7ZWR3                                        | Padi2-prov protein OS=Xenopus laevis GN=padi2 PE=2 SV       | 4.09 | 1   | 1 | 1 | 1  |
| 1170 | Q6GM62                                        | MGC83400 protein OS=Xenopus laevis GN=idh3g PE=2 S          | 4.09 | 1   | 1 | 1 | 2  |
| 1171 | Q5HZ81                                        | MGC85202 protein OS=Xenopus laevis GN=cep70 PE=2 S          | 4.08 | 227 | 1 | 2 | 2  |
| 1172 | D2CGM1                                        | Fanconi anemia complementation group C OS=Xenopus la        | 4.07 | 1   | 1 | 1 | 1  |
| 1173 | dsrrswapns_comp207165_c0_seq1                 | len=1567                                                    | 4.06 | 2   | 1 | 1 | 1  |
| 1174 | A0JMW2                                        | MGC154857 protein OS=Xenopus laevis GN=heatr2 PE=2          | 4.05 | 2   | 1 | 1 | 1  |
| 1175 | Q6NRB7                                        | Protein FAM73A OS=Xenopus laevis GN=fam73a PE=2 SV          | 4.04 | 1   | 1 | 1 | 1  |
| 1176 | Q6GQB6                                        | MGC80186 protein OS=Xenopus laevis GN=MGC80186 PE           | 4.04 | 2   | 1 | 1 | 1  |
| 1177 | CL2188Contig3                                 | CL2188Contig3                                               | 4.00 | 2   | 1 | 1 | 1  |
| 1178 | CL9794Contig1                                 | CL9794Contig1                                               | 4.00 | 1   | 1 | 1 | 1  |
| 1179 | Q6P9I7;CL6420Contig1                          | Structural maintenance of chromosomes protein 6 OS=Xen      | 3.99 | 291 | 2 | 3 | 10 |
| 1180 | Q4V7I2                                        | LOC733267 protein (Fragment) OS=Xenopus laevis GN=L         | 3.98 | 2   | 1 | 1 | 1  |
| 1181 | D3JCC3                                        | Recombination activating protein 2 (Fragment) OS=Xenopu     | 3.98 | 21  | 2 | 3 | 3  |
| 1182 | A2RV99                                        | LOC445855 protein (Fragment) OS=Xenopus laevis GN=L         | 3.97 | 228 | 1 | 2 | 2  |
| 1183 | Q5HZM8                                        | Putative uncharacterized protein OS=Xenopus laevis GN=d     | 3.96 | 1   | 1 | 1 | 1  |
| 1184 | CL3223Contig1                                 | CL3223Contig1                                               | 3.95 | 5   | 1 | 1 | 1  |
| 1185 | B9V8R9                                        | Ionotropic glutamate receptor subunit GluR3(Q)Ilop OS=Xe    | 3.95 | 1   | 1 | 1 | 1  |
| 1186 | CL1Contig1160                                 | CL1Contig1160                                               | 3.94 | 12  | 2 | 2 | 4  |
| 1187 | A0JMT7                                        | LOC431931 protein OS=Xenopus laevis GN=LOC431931 F          | 3.94 | 2   | 1 | 1 | 1  |
| 1188 | Q68F13                                        | MGC82958 protein OS=Xenopus laevis GN=sucla2 PE=2 S         | 3.93 | 4   | 1 | 1 | 2  |
| 1189 | CL25436Contig1                                | CL25436Contig1                                              | 3.93 | 1   | 1 | 1 | 1  |
| 1190 | CL9991Contig1                                 | CL9991Contig1                                               | 3.92 | 1   | 1 | 1 | 1  |
| 1191 | Q32N62                                        | LOC733423 protein (Fragment) OS=Xenopus laevis GN=L         | 3.91 | 1   | 1 | 1 | 1  |
| 1192 | Q6GNE6                                        | LOC443667 protein (Fragment) OS=Xenopus laevis GN=L         | 3.90 | 227 | 1 | 2 | 2  |
| 1193 | CL9153Contig1                                 | CL9153Contig1                                               | 3.89 | 2   | 1 | 1 | 10 |
| 1194 | Q6GNR4;CL847Contig2                           | MGC80936 protein OS=Xenopus laevis GN=cltc PE=2 SV=         | 3.88 | 4   | 3 | 3 | 8  |
| 1195 | CL342Contig4                                  | CL342Contig4                                                | 3.87 | 2   | 1 | 1 | 1  |



|      |                                                |                                                             |      |     |   |   |    |
|------|------------------------------------------------|-------------------------------------------------------------|------|-----|---|---|----|
| 1196 | Q6DD71                                         | ERO1-like protein alpha OS=Xenopus laevis GN=ero11 PE=      | 3.87 | 201 | 1 | 2 | 3  |
| 1197 | dsrrswapns_comp211061_c2_seq3                  | len=3565                                                    | 3.86 | 2   | 1 | 1 | 1  |
| 1198 | dsrrswapns_comp208608_c7_seq4                  | len=1653                                                    | 3.83 | 3   | 1 | 1 | 2  |
| 1199 | B7ZS26                                         | V-rel reticuloendotheliosis viral oncogene homolog B, nucle | 3.82 | 2   | 1 | 1 | 1  |
| 1200 | CL13527Contig1                                 | CL13527Contig1                                              | 3.81 | 2   | 1 | 1 | 1  |
| 1201 | Q5FWX4                                         | LOC733151 protein (Fragment) OS=Xenopus laevis GN=L         | 3.81 | 2   | 1 | 1 | 1  |
| 1202 | Q7ZTP2                                         | Actin-related protein 2-A OS=Xenopus laevis GN=actr2-a P    | 3.81 | 2   | 1 | 1 | 1  |
| 1203 | Q5XHM7;CL5748Contig2                           | Carbohydrate sulfotransferase 12 OS=Xenopus laevis GN=      | 3.81 | 2   | 1 | 1 | 2  |
| 1204 | zeinaSSns_comp382744_c3_seq1                   | len=1626                                                    | 3.81 | 3   | 1 | 1 | 1  |
| 1205 | Q7ZXF1                                         | Myotubularin-related protein 4 OS=Xenopus laevis GN=mtn     | 3.80 | 1   | 1 | 1 | 1  |
| 1206 | CL13399Contig1                                 | CL13399Contig1                                              | 3.80 | 1   | 1 | 1 | 1  |
| 1207 | CL6843Contig1                                  | CL6843Contig1                                               | 3.78 | 1   | 1 | 1 | 3  |
| 1208 | Q6P286;CL8201Contig1                           | Probable 2-oxoglutarate dehydrogenase E1 component DH       | 3.78 | 2   | 1 | 1 | 7  |
| 1209 | Q2VPK9                                         | Acyl-coenzyme A oxidase OS=Xenopus laevis GN=acox1 F        | 3.78 | 227 | 1 | 2 | 2  |
| 1210 | Q91593                                         | Potassium channel alpha subunit Kv2.1 OS=Xenopus laevis     | 3.77 | 227 | 1 | 2 | 2  |
| 1211 | dsrrswapns_comp211626_c8_seq3                  | len=725                                                     | 3.74 | 1   | 1 | 1 | 4  |
| 1212 | Q6GQB1                                         | MGC80200 protein OS=Xenopus laevis GN=ncram PE=2 S          | 3.74 | 1   | 2 | 2 | 3  |
| 1213 | Q32N55                                         | Pentatricopeptide repeat-containing protein 3, mitochondria | 3.74 | 1   | 1 | 1 | 1  |
| 1214 | CL2335Contig1                                  | CL2335Contig1                                               | 3.71 | 5   | 2 | 2 | 6  |
| 1215 | CL4517Contig2                                  | CL4517Contig2                                               | 3.71 | 2   | 1 | 1 | 1  |
| 1216 | Q6IR57                                         | MGC82326 protein OS=Xenopus laevis GN=sec31b PE=2 :         | 3.71 | 1   | 1 | 1 | 1  |
| 1217 | Q6GR23                                         | MGC81304 protein OS=Xenopus laevis GN=irf6 PE=2 SV=         | 3.70 | 1   | 1 | 1 | 1  |
| 1218 | CL14603Contig1                                 | CL14603Contig1                                              | 3.69 | 1   | 1 | 1 | 1  |
| 1219 | Q91819                                         | Aurora kinase A-B OS=Xenopus laevis GN=aurka-b PE=2 :       | 3.68 | 1   | 1 | 1 | 1  |
| 1220 | Q5U562                                         | LOC495358 protein OS=Xenopus laevis GN=cib1 PE=2 SV         | 3.68 | 3   | 1 | 1 | 2  |
| 1221 | CL19605Contig1                                 | CL19605Contig1                                              | 3.66 | 1   | 1 | 1 | 1  |
| 1222 | Q90X20                                         | Aryl hydrocarbon receptor nuclear translocator Arnt OS=Xe   | 3.65 | 1   | 1 | 1 | 1  |
| 1223 | Q3KQB6                                         | CTD small phosphatase-like protein 2-B OS=Xenopus laevi     | 3.65 | 5   | 1 | 1 | 2  |
| 1224 | Q7ZXB9;CL335Contig7                            | Faf1-prov protein OS=Xenopus laevis PE=2 SV=1 - [Q7ZXB      | 3.65 | 256 | 1 | 2 | 3  |
| 1225 | Q2TAS1;CL8143Contig1                           | MGC130979 protein OS=Xenopus laevis GN=sp1tc3 PE=2 :        | 3.64 | 1   | 1 | 1 | 3  |
| 1226 | Q53177                                         | Exportin-6-A OS=Xenopus laevis GN=xpo6-a PE=1 SV=1 -        | 3.61 | 1   | 1 | 1 | 1  |
| 1227 | CL1526Contig4                                  | CL1526Contig4                                               | 3.61 | 1   | 1 | 1 | 1  |
| 1228 | Q498L4                                         | LOC734164 protein (Fragment) OS=Xenopus laevis GN=L         | 3.61 | 5   | 1 | 1 | 2  |
| 1229 | Q6PAD5                                         | MGC68755 protein OS=Xenopus laevis GN=pnlipr2 PE=2          | 3.61 | 1   | 1 | 1 | 1  |
| 1230 | CL15037Contig1                                 | CL15037Contig1                                              | 3.60 | 1   | 2 | 2 | 5  |
| 1231 | Q566H1                                         | MGC115310 protein OS=Xenopus laevis GN=crmp1 PE=2           | 3.59 | 1   | 1 | 1 | 2  |
| 1232 | Q6GQA7;CL5376Contig2                           | MGC80207 protein OS=Xenopus laevis GN=dars PE=2 SV          | 3.58 | 2   | 1 | 1 | 2  |
| 1233 | Q32NH8                                         | 1-phosphatidylinositol 4,5-bisphosphate phosphodiesterase   | 3.56 | 1   | 1 | 1 | 1  |
| 1234 | Q8AVF3                                         | LOC398536 protein (Fragment) OS=Xenopus laevis GN=L         | 3.56 | 1   | 1 | 1 | 1  |
| 1235 | Q6PCK3                                         | MGC68869 protein OS=Xenopus laevis PE=2 SV=1 - [Q6P         | 3.55 | 3   | 1 | 1 | 1  |
| 1236 | CL7317Contig1                                  | CL7317Contig1                                               | 3.54 | 3   | 1 | 1 | 1  |
| 1237 | Q6NU47;CL6335Contig1                           | Serine/threonine-protein kinase pdk11-A OS=Xenopus laevi    | 3.54 | 6   | 1 | 1 | 2  |
| 1238 | Q91785                                         | Kinesin-like protein KIF15-A OS=Xenopus laevis GN=kif15-    | 3.53 | 252 | 1 | 2 | 3  |
| 1239 | CL8749Contig2                                  | CL8749Contig2                                               | 3.53 | 2   | 1 | 1 | 1  |
| 1240 | Q8QG78                                         | Nuclear receptor corepressor 1 OS=Xenopus laevis GN=nc      | 3.52 | 2   | 2 | 2 | 2  |
| 1241 | Q8UVR5                                         | Bromodomain adjacent to zinc finger domain protein 1A (Fr   | 3.51 | 1   | 1 | 1 | 1  |
| 1242 | Q561N7                                         | LOC733199 protein (Fragment) OS=Xenopus laevis GN=L         | 3.51 | 1   | 1 | 1 | 1  |
| 1243 | B2GTY1                                         | LOC100158450 protein (Fragment) OS=Xenopus laevis GN        | 3.51 | 1   | 1 | 1 | 1  |
| 1244 | dsrrswapns_comp197215_c0_seq2                  | len=1652                                                    | 3.50 | 1   | 1 | 1 | 1  |
| 1245 | dsrrswapns_comp216642_c2_seq2                  | len=3947                                                    | 3.50 | 3   | 1 | 1 | 1  |
| 1246 | Q6AX29                                         | MGC86330 protein OS=Xenopus laevis GN=kcj1 PE=2 SV          | 3.49 | 1   | 1 | 1 | 1  |
| 1247 | Q6NRT0;TC416396 UniRef100_Q6NRT0 Cluster: MGC8 | Casein kinase I isoform gamma-1 OS=Xenopus laevis GN=       | 3.48 | 3   | 1 | 1 | 5  |
| 1248 | B7ZSA6;CL4246Contig2                           | Inversin OS=Xenopus laevis GN=invs-a PE=2 SV=1 - [B7Z       | 3.48 | 291 | 1 | 2 | 3  |
| 1249 | Q5XHD4                                         | LOC495031 protein OS=Xenopus laevis GN=c1galt1c1 PE=        | 3.47 | 1   | 1 | 1 | 1  |
| 1250 | CL11454Contig2                                 | CL11454Contig2                                              | 3.47 | 1   | 1 | 1 | 1  |
| 1251 | Q6AZU4                                         | MGC79131 protein OS=Xenopus laevis GN=MGC79131 PE           | 3.46 | 2   | 1 | 1 | 1  |
| 1252 | CL8237Contig1                                  | CL8237Contig1                                               | 3.45 | 1   | 1 | 1 | 1  |
| 1253 | Q641F3                                         | Collagen alpha-1(XVI) chain OS=Xenopus laevis GN=col21      | 3.45 | 1   | 1 | 1 | 1  |
| 1254 | zeinaSSns_comp388960_c0_seq4                   | len=2747                                                    | 3.44 | 4   | 1 | 1 | 1  |
| 1255 | B7ZQB3                                         | LOC398954 protein OS=Xenopus laevis GN=LOC398954 F          | 3.41 | 2   | 1 | 1 | 1  |
| 1256 | Q804I2                                         | Germes OS=Xenopus laevis GN=LOC398520 PE=2 SV=1 -           | 3.41 | 1   | 1 | 1 | 1  |
| 1257 | Q6DEA4;CL3873Contig1                           | MGC79068 protein OS=Xenopus laevis GN=pdia6 PE=2 SV         | 3.39 | 3   | 1 | 1 | 2  |
| 1258 | CL13100Contig1                                 | CL13100Contig1                                              | 3.38 | 1   | 3 | 3 | 10 |
| 1259 | Q641J8;CL811Contig3                            | E3 ubiquitin-protein ligase RNF12-A OS=Xenopus laevis GI    | 3.38 | 2   | 1 | 1 | 2  |
| 1260 | Q5FWP2                                         | Protein Smaug homolog 1 OS=Xenopus laevis GN=samd4          | 3.38 | 1   | 1 | 1 | 1  |
| 1261 | CL4772Contig2                                  | CL4772Contig2                                               | 3.37 | 2   | 1 | 1 | 1  |
| 1262 | CL3520Contig1                                  | CL3520Contig1                                               | 3.36 | 1   | 1 | 1 | 1  |
| 1263 | CL4145Contig1                                  | CL4145Contig1                                               | 3.36 | 4   | 1 | 1 | 1  |
| 1264 | CL2808Contig3                                  | CL2808Contig3                                               | 3.35 | 1   | 1 | 1 | 1  |
| 1265 | Q6DDQ3                                         | Anoctamin OS=Xenopus laevis GN=ano5 PE=2 SV=1 - [Q6         | 3.35 | 1   | 1 | 1 | 1  |
| 1266 | Q4QY31;CL2078Contig2                           | Aryl hydrocarbon receptor 1 alpha OS=Xenopus laevis GN=     | 3.35 | 2   | 1 | 1 | 2  |
| 1267 | P18748                                         | Oocyte zinc finger protein XICOF29 OS=Xenopus laevis PE     | 3.35 | 1   | 1 | 1 | 1  |
| 1268 | Q6GQ61                                         | MGC80319 protein OS=Xenopus laevis GN=dnpep PE=2 S          | 3.34 | 1   | 1 | 1 | 1  |
| 1269 | Q6IVY4;CL5230Contig1                           | Protein phosphatase Slingshot homolog OS=Xenopus laevi      | 3.33 | 1   | 1 | 1 | 4  |
| 1270 | Q6DKC6                                         | MGC84147 protein OS=Xenopus laevis GN=MGC84147 PE           | 3.33 | 1   | 1 | 1 | 1  |
| 1271 | Q2TAQ1                                         | Putative elongator complex protein 1 OS=Xenopus laevis G    | 3.33 | 227 | 1 | 2 | 3  |
| 1272 | CL7666Contig1                                  | CL7666Contig1                                               | 3.32 | 1   | 1 | 1 | 1  |
| 1273 | Q5XGV1                                         | LOC398569 protein OS=Xenopus laevis GN=anln PE=2 SV         | 3.32 | 2   | 1 | 1 | 1  |
| 1274 | Q5XHG7;CL1310Contig3                           | LOC398345 protein OS=Xenopus laevis GN=furin PE=2 SV        | 3.31 | 4   | 1 | 1 | 2  |
| 1275 | A9QW72                                         | N-methyl-D-aspartate receptor subunit NR2A OS=Xenopus       | 3.31 | 546 | 1 | 3 | 3  |
| 1276 | B1H1X4                                         | Serrate RNA effector molecule homolog A OS=Xenopus lae      | 3.30 | 1   | 1 | 1 | 2  |
| 1277 | CL4263Contig3                                  | CL4263Contig3                                               | 3.30 | 1   | 1 | 1 | 2  |
| 1278 | CL7240Contig1                                  | CL7240Contig1                                               | 3.29 | 1   | 1 | 1 | 1  |
| 1279 | Q98T92                                         | Mps1/TTK OS=Xenopus laevis GN=ttk PE=2 SV=1 - [Q98T         | 3.29 | 1   | 1 | 1 | 1  |
| 1280 | Q91687                                         | Integrin alpha-4 OS=Xenopus laevis GN=itga4 PE=2 SV=1       | 3.29 | 1   | 1 | 1 | 1  |
| 1281 | Q6NRS1                                         | Inhibitor of Bruton tyrosine kinase OS=Xenopus laevis GN=   | 3.29 | 1   | 1 | 1 | 1  |

|      |                                      |                                                              |      |     |   |   |   |    |
|------|--------------------------------------|--------------------------------------------------------------|------|-----|---|---|---|----|
| 1282 | Q68F30                               | MGC82115 protein OS=Xenopus laevis GN=alas2 PE=2 S           | 3.28 |     | 1 | 1 | 1 | 1  |
| 1283 | CL8625Contig1                        | CL8625Contig1                                                | 3.26 |     | 2 | 1 | 1 | 1  |
| 1284 | Q5U5A3                               | Immunoglobulin superfamily member 3 OS=Xenopus laevis        | 3.26 |     | 2 | 2 | 2 | 2  |
| 1285 | dsrrswapns_comp217164_c6_seq9        | len=2926                                                     | 3.24 |     | 2 | 1 | 1 | 2  |
| 1286 | dsrrswapns_comp216092_c0_seq2        | len=2393                                                     | 3.23 |     | 1 | 1 | 1 | 4  |
| 1287 | CL7447Contig1                        | CL7447Contig1                                                | 3.23 |     | 1 | 1 | 1 | 1  |
| 1288 | Q498G7                               | PKC-delta2 protein OS=Xenopus laevis GN=prkc2 PE=2 S         | 3.22 |     | 4 | 1 | 1 | 1  |
| 1289 | Q6GPK9;CL1Contig1019                 | Serine/threonine-protein kinase TAO2 OS=Xenopus laevis       | 3.22 | 290 |   | 1 | 2 | 3  |
| 1290 | Q9W650                               | C-met/hepatocyte growth factor receptor OS=Xenopus laevis    | 3.20 |     | 1 | 1 | 1 | 1  |
| 1291 | D2DGW1                               | Cell division cycle associated 2 OS=Xenopus laevis PE=2 S    | 3.19 |     | 8 | 2 | 2 | 4  |
| 1292 | CL31693Contig1                       | CL31693Contig1                                               | 3.19 |     | 2 | 1 | 1 | 1  |
| 1293 | CL7008Contig1                        | CL7008Contig1                                                | 3.19 |     | 2 | 1 | 1 | 3  |
| 1294 | Q6INE5                               | Rho GTPase-activating protein 19 OS=Xenopus laevis GN=       | 3.16 | 253 |   | 1 | 2 | 2  |
| 1295 | dsrrswapns_comp196386_c1_seq2        | len=2839                                                     | 3.14 |     | 2 | 1 | 1 | 1  |
| 1296 | Q5XHE3                               | LOC495024 protein OS=Xenopus laevis GN=cdh13 PE=1 S          | 3.10 |     | 1 | 1 | 1 | 1  |
| 1297 | Q6IP76                               | RAC-beta serine/threonine-protein kinase B OS=Xenopus laevis | 3.09 |     | 2 | 1 | 1 | 1  |
| 1298 | A1L106;CL10855Contig1                | Lgtn protein OS=Xenopus laevis GN=eif2d PE=2 SV=1 - [A       | 3.09 | 228 |   | 1 | 2 | 5  |
| 1299 | CL3295Contig3                        | CL3295Contig3                                                | 3.07 |     | 1 | 1 | 1 | 2  |
| 1300 | dsrrswapns_comp216121_c4_seq1        | len=842                                                      | 3.07 |     | 2 | 1 | 1 | 1  |
| 1301 | dsrrswapns_comp214133_c0_seq2        | len=1048                                                     | 3.06 |     | 3 | 1 | 1 | 1  |
| 1302 | Q6ZXA0                               | Alpha-N-acetylneuraminide alpha-2,8-sialyltransferase OS=    | 3.06 |     | 1 | 1 | 1 | 1  |
| 1303 | Q498H6                               | MGC114937 protein OS=Xenopus laevis GN=papss1 PE=2 S         | 3.04 |     | 1 | 1 | 1 | 1  |
| 1304 | Q63ZN4                               | LOC494770 protein OS=Xenopus laevis GN=cbx6 PE=2 S           | 3.04 | 290 |   | 1 | 2 | 2  |
| 1305 | A7E223                               | LOC100125672 protein OS=Xenopus laevis GN=LOC1001;           | 3.03 |     | 3 | 1 | 1 | 3  |
| 1306 | AOJPG5                               | LOC100036792 protein (Fragment) OS=Xenopus laevis GN         | 3.03 |     | 3 | 1 | 1 | 1  |
| 1307 | Q5U4I3                               | Cyclin-D1-binding protein 1 homolog OS=Xenopus laevis G      | 3.02 |     | 1 | 1 | 1 | 1  |
| 1308 | Q66J92;CL2050Contig1                 | Gtse1 protein OS=Xenopus laevis GN=gtse1 PE=2 SV=1 -         | 3.01 |     | 4 | 1 | 1 | 2  |
| 1309 | CL2776Contig2                        | CL2776Contig2                                                | 3.00 |     | 2 | 1 | 1 | 2  |
| 1310 | Q642S3                               | MGC81229 protein OS=Xenopus laevis GN=tubgcp4 PE=2 S         | 3.00 |     | 1 | 1 | 1 | 1  |
| 1311 | Q66JA7;CL1690Contig2                 | Pdha1-b protein OS=Xenopus laevis GN=pdha1 PE=2 SV=          | 3.00 |     | 8 | 1 | 1 | 7  |
| 1312 | Q6DE96                               | Protein IWS1 homolog A OS=Xenopus laevis GN=iws1-a P         | 2.99 |     | 7 | 2 | 2 | 2  |
| 1313 | Q8AX85                               | RNA-binding protein VgRBP71 OS=Xenopus laevis GN=Kh          | 2.98 |     | 9 | 2 | 2 | 5  |
| 1314 | Q4V7K0                               | Putative uncharacterized protein OS=Xenopus laevis PE=2      | 2.96 |     | 2 | 1 | 1 | 1  |
| 1315 | CL303Contig6                         | CL303Contig6                                                 | 2.96 |     | 7 | 2 | 4 | 11 |
| 1316 | CL6506Contig2                        | CL6506Contig2                                                | 2.96 |     | 1 | 1 | 1 | 1  |
| 1317 | Q5PPU1                               | LOC496080 protein (Fragment) OS=Xenopus laevis GN=L          | 2.95 |     | 2 | 1 | 1 | 1  |
| 1318 | Q7ZXI2                               | Slit1 protein OS=Xenopus laevis GN=slit1 PE=2 SV=1 - [Q7     | 2.94 |     | 1 | 1 | 2 | 2  |
| 1319 | CL18313Contig1                       | CL18313Contig1                                               | 2.94 |     | 1 | 1 | 1 | 2  |
| 1320 | Q6DFK4;CL10561Contig1                | MGC81344 protein OS=Xenopus laevis GN=etaa1 PE=2 S           | 2.93 |     | 1 | 1 | 1 | 3  |
| 1321 | Q6NRV4                               | Retinol dehydrogenase 10-B OS=Xenopus laevis GN=rdh10        | 2.93 |     | 1 | 1 | 1 | 1  |
| 1322 | Q05AW7                               | Cytoplasmic tRNA 2-thiolation protein 1 OS=Xenopus laevis    | 2.93 |     | 1 | 1 | 1 | 1  |
| 1323 | C5H606                               | Vitronectin OS=Xenopus laevis GN=vtn PE=2 SV=1 - [C5H        | 2.93 |     | 1 | 1 | 1 | 1  |
| 1324 | Q7ZWP8;CL6523Contig2                 | DNA topoisomerase OS=Xenopus laevis GN=top3b PE=2 S          | 2.91 |     | 3 | 1 | 1 | 2  |
| 1325 | CL998Contig3                         | CL998Contig3                                                 | 2.91 |     | 1 | 1 | 1 | 1  |
| 1326 | Q9PUU6                               | Frizzled-2 OS=Xenopus laevis GN=fzd2 PE=2 SV=1 - [FZD        | 2.90 |     | 1 | 1 | 1 | 1  |
| 1327 | Q98SG0                               | Beta-amyloid protein A OS=Xenopus laevis GN=app PE=2 S       | 2.89 |     | 4 | 1 | 1 | 1  |
| 1328 | G1ESZ8                               | Putative beta-N-acetylhexosaminidase (Fragment) OS=Xen       | 2.88 |     | 5 | 1 | 1 | 5  |
| 1329 | CL2920Contig1                        | CL2920Contig1                                                | 2.88 |     | 2 | 1 | 1 | 1  |
| 1330 | dsrrswapns_comp215363_c2_seq10       | len=1552                                                     | 2.85 |     | 3 | 1 | 1 | 1  |
| 1331 | Q9I8P8;CL2106Contig1                 | FK506-binding protein OS=Xenopus laevis GN=fkbp10 PE=        | 2.84 |     | 4 | 1 | 1 | 15 |
| 1332 | CL151Contig7                         | CL151Contig7                                                 | 2.84 |     | 1 | 1 | 1 | 1  |
| 1333 | Q6INE6                               | LOC432244 protein (Fragment) OS=Xenopus laevis GN=L          | 2.84 | 252 |   | 1 | 2 | 2  |
| 1334 | dsrrswapns_comp215943_c3_seq1        | len=2923                                                     | 2.83 |     | 1 | 1 | 1 | 3  |
| 1335 | Q6INT1                               | MGC80376 protein OS=Xenopus laevis GN=ikkbk PE=1 S           | 2.83 |     | 2 | 1 | 1 | 2  |
| 1336 | Q6GPE1;CL1282Contig2                 | Wu:fc30a11 protein OS=Xenopus laevis GN=ap1g1 PE=2 S         | 2.83 | 258 |   | 1 | 2 | 5  |
| 1337 | Q6GP17;CL314Contig3                  | Histone-lysine N-methyltransferase SUV420H1-A OS=Xenc        | 2.81 |     | 1 | 1 | 1 | 4  |
| 1338 | Q0IH25                               | Kntc2 protein OS=Xenopus laevis GN=kntc2 PE=2 SV=1 -         | 2.81 |     | 2 | 1 | 1 | 1  |
| 1339 | Q641D9;CL1834Contig5                 | MGC81931 protein OS=Xenopus laevis GN=sec14i5 PE=2 S         | 2.80 |     | 1 | 1 | 1 | 2  |
| 1340 | Q6EAN5                               | Transcription factor OS=Xenopus laevis GN=sall2 PE=2 SV      | 2.80 |     | 1 | 1 | 1 | 2  |
| 1341 | Q66IT5                               | MGC84699 protein OS=Xenopus laevis GN=sntg2 PE=2 S           | 2.78 |     | 1 | 1 | 1 | 2  |
| 1342 | Q66KR8;CL712Contig1                  | MGC85505 protein OS=Xenopus laevis GN=utp11i PE=2 S          | 2.77 |     | 1 | 1 | 1 | 16 |
| 1343 | Q6DDK5                               | Acetolactate synthase-like protein OS=Xenopus laevis GN=     | 2.77 |     | 1 | 1 | 1 | 1  |
| 1344 | Q7ZYL5                               | Kinesin-like protein KIF22-B OS=Xenopus laevis GN=kif22-     | 2.77 |     | 1 | 1 | 1 | 1  |
| 1345 | Q68F42                               | MGC81821 protein OS=Xenopus laevis GN=dpyd PE=2 SV           | 2.77 |     | 1 | 1 | 1 | 1  |
| 1346 | Q6DDZ4                               | LOC398498 protein OS=Xenopus laevis GN=LOC398498 F           | 2.76 |     | 3 | 1 | 1 | 2  |
| 1347 | Q6PB11;dsrrswapns_comp214341_c2_seq3 | MGC68624 protein OS=Xenopus laevis GN=npri3 PE=2 S           | 2.76 |     | 2 | 1 | 1 | 2  |
| 1348 | CL9235Contig3                        | CL9235Contig3                                                | 2.76 |     | 1 | 1 | 1 | 1  |
| 1349 | Q8QFX3                               | Myeloperoxidase, peroxidase 2' OS=Xenopus laevis GN=m        | 2.76 |     | 3 | 1 | 1 | 1  |
| 1350 | Q640G5                               | LOC494678 protein (Fragment) OS=Xenopus laevis GN=L          | 2.75 |     | 1 | 1 | 1 | 1  |
| 1351 | Q6GQA8                               | LOC443584 protein (Fragment) OS=Xenopus laevis GN=L          | 2.73 |     | 2 | 1 | 1 | 1  |
| 1352 | dsrrswapns_comp189792_c1_seq1        | len=1253                                                     | 2.73 |     | 2 | 1 | 1 | 1  |
| 1353 | dsrrswapns_comp209806_c1_seq5        | len=893                                                      | 2.72 |     | 1 | 1 | 1 | 1  |
| 1354 | H9B3Z0                               | Bromodomain adjacent to zinc finger domain-like protein 2E   | 2.72 |     | 2 | 1 | 1 | 1  |
| 1355 | dsrrswapns_comp214613_c0_seq5        | len=3333                                                     | 2.72 |     | 5 | 1 | 1 | 1  |
| 1356 | CL3320Contig1                        | CL3320Contig1                                                | 2.70 |     | 2 | 1 | 1 | 1  |
| 1357 | O57526                               | Insulin-like growth factor 2 mRNA-binding protein 3-B OS=>   | 2.70 |     | 2 | 1 | 1 | 1  |
| 1358 | CL4229Contig1                        | CL4229Contig1                                                | 2.70 |     | 1 | 1 | 1 | 1  |
| 1359 | O42507                               | Thrombospondin-3 (Fragment) OS=Xenopus laevis PE=2 S         | 2.70 |     | 1 | 1 | 1 | 1  |
| 1360 | CL521Contig1                         | CL521Contig1                                                 | 2.69 |     | 6 | 1 | 1 | 1  |
| 1361 | Q6PA48                               | Protein TBRG4 OS=Xenopus laevis GN=tbrg4 PE=2 SV=1           | 2.69 |     | 1 | 1 | 1 | 1  |
| 1362 | CL1401Contig6                        | CL1401Contig6                                                | 2.68 |     | 3 | 1 | 1 | 1  |
| 1363 | Q7ZYF6                               | Bag3-A protein OS=Xenopus laevis GN=bag3 PE=2 SV=1 -         | 2.68 |     | 1 | 1 | 1 | 1  |
| 1364 | CL13132Contig1                       | CL13132Contig1                                               | 2.68 |     | 1 | 1 | 1 | 1  |
| 1365 | CL2885Contig1;Q91929                 | CL2885Contig1                                                | 2.67 |     | 1 | 1 | 1 | 4  |
| 1366 | Q4V7L1                               | MGC115598 protein OS=Xenopus laevis GN=MGC115598             | 2.66 |     | 1 | 1 | 1 | 1  |
| 1367 | Q7T106;33416619                      | MGC68423 protein OS=Xenopus laevis GN=10a.11 PE=2 S          | 2.66 |     | 9 | 1 | 1 | 3  |

|      |                                      |                                                            |      |     |   |   |    |
|------|--------------------------------------|------------------------------------------------------------|------|-----|---|---|----|
| 1368 | Q6GNT1;CL1947Contig1                 | MGC80898 protein OS=Xenopus laevis GN=brd1 PE=2 SV         | 2.65 | 253 | 1 | 2 | 3  |
| 1369 | Q6INT7                               | MGC80341 protein OS=Xenopus laevis GN=mark1 PE=2 S         | 2.65 | 227 | 1 | 2 | 2  |
| 1370 | Q66IX2                               | MGC84231 protein OS=Xenopus laevis GN=psmd13 PE=2          | 2.65 | 1   | 1 | 1 | 1  |
| 1371 | CL3876Contig1                        | CL3876Contig1                                              | 2.64 | 1   | 1 | 1 | 1  |
| 1372 | AQJMZ1;CL1Contig964                  | Nucleolar and spindle-associated protein 1-B OS=Xenopus    | 2.62 | 230 | 1 | 2 | 3  |
| 1373 | Q2TAF4;CL5014Contig2                 | Integrator complex subunit 6-A OS=Xenopus laevis GN=int    | 2.60 | 2   | 1 | 1 | 9  |
| 1374 | dsrrswapns_comp217589_c0_seq4        | len=5068                                                   | 2.60 | 2   | 1 | 1 | 1  |
| 1375 | CL6354Contig1                        | CL6354Contig1                                              | 2.59 | 1   | 1 | 1 | 1  |
| 1376 | CL21287Contig1                       | CL21287Contig1                                             | 2.58 | 1   | 1 | 1 | 1  |
| 1377 | A4IFX5                               | LOC100049142 protein (Fragment) OS=Xenopus laevis GN       | 2.57 | 1   | 1 | 1 | 1  |
| 1378 | Q4V7V7                               | MGC115244 protein OS=Xenopus laevis GN=hmgxb3 PE=          | 2.57 | 1   | 1 | 1 | 1  |
| 1379 | A1L2J4                               | Putative uncharacterized protein (Fragment) OS=Xenopus l   | 2.56 | 3   | 1 | 1 | 1  |
| 1380 | Q5EAY8                               | Transmembrane anterior posterior transformation protein 1  | 2.56 | 227 | 1 | 2 | 3  |
| 1381 | Q501Q8                               | MGC99195 protein OS=Xenopus laevis GN=sel11 PE=2 SV        | 2.55 | 1   | 1 | 1 | 1  |
| 1382 | Q641D4                               | MGC82000 protein OS=Xenopus laevis GN=golm1 PE=2 S         | 2.54 | 3   | 1 | 1 | 15 |
| 1383 | dsrrswapns_comp215656_c4_seq1        | len=2897                                                   | 2.53 | 3   | 1 | 1 | 1  |
| 1384 | Q4KLT2                               | MGC115451 protein OS=Xenopus laevis GN=MGC115451           | 2.53 | 6   | 1 | 1 | 6  |
| 1385 | A0JMY5;CL6629Contig1                 | NF-X1-type zinc finger protein NFXL1 OS=Xenopus laevis (   | 2.52 | 1   | 1 | 1 | 2  |
| 1386 | Q56A68                               | LOC733185 protein (Fragment) OS=Xenopus laevis GN=L(       | 2.50 | 290 | 1 | 2 | 2  |
| 1387 | CL19415Contig1                       | CL19415Contig1                                             | 2.50 | 1   | 1 | 1 | 1  |
| 1388 | Q7ZXT0                               | Egfl7 protein OS=Xenopus laevis GN=egfl7 PE=2 SV=1 - [C    | 2.50 | 2   | 1 | 1 | 1  |
| 1389 | 28386279                             | Xenopus laevis, Similar to propionyl Coenzyme A carboxyla  | 2.48 | 1   | 1 | 1 | 1  |
| 1390 | Q7ZTA4                               | Hus1 protein OS=Xenopus laevis GN=hus1 PE=2 SV=1 - [C      | 2.48 | 2   | 1 | 1 | 1  |
| 1391 | CL11346Contig1                       | CL11346Contig1                                             | 2.48 | 2   | 1 | 1 | 2  |
| 1392 | A1L2U3                               | LOC100036954 protein OS=Xenopus laevis GN=LOC1000:         | 2.47 | 2   | 1 | 1 | 2  |
| 1393 | CL24722Contig1                       | CL24722Contig1                                             | 2.47 | 2   | 1 | 1 | 1  |
| 1394 | CL1151Contig6                        | CL1151Contig6                                              | 2.46 | 1   | 1 | 1 | 1  |
| 1395 | Q6GQ97                               | MGC80235 protein OS=Xenopus laevis GN=rassf3 PE=2 S        | 2.46 | 1   | 1 | 1 | 5  |
| 1396 | Q32NR3                               | DNA-binding protein RFX2 OS=Xenopus laevis GN=rfx2 PE      | 2.45 | 1   | 1 | 1 | 4  |
| 1397 | CL3570Contig2                        | CL3570Contig2                                              | 2.45 | 3   | 1 | 1 | 1  |
| 1398 | Q4FZX3                               | LOC432087 protein (Fragment) OS=Xenopus laevis GN=L(       | 2.44 | 13  | 1 | 1 | 10 |
| 1399 | Q4V7N2                               | tRNA (cytosine(34)-C(5))-methyltransferase OS=Xenopus l    | 2.44 | 2   | 1 | 1 | 1  |
| 1400 | CL1Contig104                         | CL1Contig104                                               | 2.43 | 4   | 1 | 1 | 1  |
| 1401 | Q6GNZ4                               | MGC80774 protein OS=Xenopus laevis GN=mlh3 PE=2 SV         | 2.43 | 1   | 1 | 1 | 1  |
| 1402 | CL5194Contig2                        | CL5194Contig2                                              | 2.43 | 2   | 1 | 1 | 1  |
| 1403 | CL7044Contig1                        | CL7044Contig1                                              | 2.43 | 1   | 1 | 1 | 1  |
| 1404 | CL3902Contig1                        | CL3902Contig1                                              | 2.42 | 1   | 1 | 1 | 1  |
| 1405 | A1L3F7                               | LOC100036993 protein (Fragment) OS=Xenopus laevis GN       | 2.40 | 2   | 1 | 1 | 1  |
| 1406 | Q6DJH9;dsrrswapns_comp216790_c1_seq4 | MGC83433 protein OS=Xenopus laevis GN=smg7 PE=2 S          | 2.39 | 201 | 1 | 2 | 7  |
| 1407 | A5XAW2                               | Kinesin heavy chain (Fragment) OS=Xenopus laevis GN=K      | 2.39 | 1   | 1 | 1 | 3  |
| 1408 | Q7ZWS4                               | MGC53764 protein OS=Xenopus laevis GN=rpn2 PE=2 SV         | 2.38 | 5   | 1 | 1 | 17 |
| 1409 | CL8729Contig1                        | CL8729Contig1                                              | 2.37 | 4   | 1 | 1 | 1  |
| 1410 | CL9389Contig1                        | CL9389Contig1                                              | 2.36 | 1   | 1 | 1 | 1  |
| 1411 | CL38290Contig1                       | CL38290Contig1                                             | 2.36 | 1   | 1 | 1 | 1  |
| 1412 | CL9699Contig1                        | CL9699Contig1                                              | 2.36 | 1   | 1 | 1 | 1  |
| 1413 | Q7ZYF4                               | Gfpt1-prov protein OS=Xenopus laevis GN=gfpt2 PE=2 SV:     | 2.35 | 1   | 1 | 1 | 2  |
| 1414 | Q6PCJ3                               | MGC68945 protein OS=Xenopus laevis GN=yeats2 PE=2 S        | 2.34 | 1   | 1 | 1 | 1  |
| 1415 | CL574Contig9                         | CL574Contig9                                               | 2.33 | 1   | 1 | 1 | 1  |
| 1416 | CL3688Contig1                        | CL3688Contig1                                              | 2.33 | 1   | 1 | 1 | 1  |
| 1417 | Q4V7W0                               | MGC80416 protein OS=Xenopus laevis GN=MGC80416 PE          | 2.33 | 2   | 1 | 1 | 1  |
| 1418 | Q5HZ99;CL2118Contig4                 | MGC85083 protein OS=Xenopus laevis GN=dsc3 PE=2 SV         | 2.33 | 2   | 1 | 1 | 2  |
| 1419 | A3KMH8                               | LOC398050 protein OS=Xenopus laevis GN=LOC398050 F         | 2.31 | 229 | 1 | 2 | 2  |
| 1420 | CL5248Contig1                        | CL5248Contig1                                              | 2.30 | 1   | 1 | 1 | 1  |
| 1421 | Q9DGF4                               | Prox 1 protein OS=Xenopus laevis GN=prox1 PE=2 SV=1 -      | 2.30 | 1   | 1 | 1 | 1  |
| 1422 | Q9IBF6                               | Prolactin receptor OS=Xenopus laevis GN=prlr PE=2 SV=1     | 2.29 | 2   | 1 | 1 | 1  |
| 1423 | CL6953Contig2                        | CL6953Contig2                                              | 2.26 | 1   | 1 | 1 | 2  |
| 1424 | dsrrswapns_comp217466_c0_seq5        | len=4926                                                   | 2.26 | 3   | 1 | 1 | 4  |
| 1425 | Q6IRN1;CL8563Contig2                 | MGC83880 protein OS=Xenopus laevis GN=eftud1 PE=2 S        | 2.26 | 2   | 1 | 1 | 10 |
| 1426 | Q9DEF3                               | Patched-2 OS=Xenopus laevis GN=ptch2 PE=2 SV=1 - [Q        | 2.26 | 1   | 1 | 1 | 1  |
| 1427 | CL4162Contig1                        | CL4162Contig1                                              | 2.25 | 2   | 1 | 1 | 1  |
| 1428 | Q4KLP9;CL7902Contig1                 | MGC115697 protein OS=Xenopus laevis GN=parg PE=2 S         | 2.24 | 1   | 1 | 1 | 4  |
| 1429 | CL16886Contig1                       | CL16886Contig1                                             | 2.24 | 1   | 1 | 1 | 9  |
| 1430 | CL7485Contig1                        | CL7485Contig1                                              | 2.24 | 2   | 1 | 1 | 1  |
| 1431 | A0AUS4;CL3713Contig3                 | LOC398314 protein OS=Xenopus laevis GN=dlat PE=2 SV:       | 2.23 | 5   | 1 | 1 | 4  |
| 1432 | Q6PAC8                               | MGC68803 protein OS=Xenopus laevis GN=MGC68803 PE          | 2.23 | 1   | 1 | 1 | 2  |
| 1433 | CL1416Contig2                        | CL1416Contig2                                              | 2.23 | 3   | 1 | 1 | 1  |
| 1434 | CL979Contig6                         | CL979Contig6                                               | 2.22 | 2   | 1 | 1 | 1  |
| 1435 | CL2664Contig2                        | CL2664Contig2                                              | 2.22 | 1   | 1 | 1 | 1  |
| 1436 | A0AUT1                               | Trichoplein keratin filament-binding protein OS=Xenopus la | 2.20 | 1   | 1 | 1 | 1  |
| 1437 | CL4601Contig1                        | CL4601Contig1                                              | 2.18 | 2   | 1 | 1 | 1  |
| 1438 | Q66K16;CL1079Contig4                 | Pum1-A protein OS=Xenopus laevis GN=pum1 PE=2 SV=1         | 2.18 | 5   | 1 | 1 | 2  |
| 1439 | Q5PPV5                               | Zinc finger C2HC domain-containing protein 1A OS=Xenopi    | 2.17 | 3   | 1 | 1 | 4  |
| 1440 | CL10383Contig2                       | CL10383Contig2                                             | 2.17 | 2   | 1 | 1 | 7  |
| 1441 | Q8QFR2                               | Protein HIRA OS=Xenopus laevis GN=hira PE=1 SV=2 - [H      | 2.17 | 6   | 2 | 2 | 2  |
| 1442 | CL5361Contig2                        | CL5361Contig2                                              | 2.17 | 1   | 1 | 1 | 1  |
| 1443 | B9V5F5                               | Centrosomal protein of 63 kDa-A OS=Xenopus laevis GN=c     | 2.16 | 290 | 1 | 2 | 2  |
| 1444 | Q767H5                               | Serine/threonine protein kinase BRAF OS=Xenopus laevis i   | 2.15 | 2   | 1 | 1 | 1  |
| 1445 | CL416Contig6                         | CL416Contig6                                               | 2.15 | 2   | 1 | 1 | 1  |
| 1446 | A4IFX0                               | LOC100049139 protein OS=Xenopus laevis GN=LOC1000:         | 2.14 | 1   | 1 | 1 | 1  |
| 1447 | Q6GLN2                               | MGC84671 protein OS=Xenopus laevis GN=wasf1 PE=2 S         | 2.14 | 1   | 1 | 1 | 1  |
| 1448 | P70047;CL2Contig68                   | Myelin transcription factor 1 OS=Xenopus laevis GN=myt1 l  | 2.14 | 6   | 1 | 1 | 3  |
| 1449 | Q4V801                               | LOC398774 protein OS=Xenopus laevis GN=LOC398774 F         | 2.14 | 1   | 1 | 1 | 1  |
| 1450 | Q91757                               | Glycogen synthase kinase-3 beta OS=Xenopus laevis GN=      | 2.14 | 1   | 1 | 1 | 1  |
| 1451 | CL4762Contig1                        | CL4762Contig1                                              | 2.14 | 1   | 1 | 1 | 1  |
| 1452 | Q6IP81                               | MGC78867 protein OS=Xenopus laevis GN=Ita4h PE=2 SV        | 2.13 | 1   | 1 | 1 | 2  |
| 1453 | CL3733Contig2                        | CL3733Contig2                                              | 2.13 | 1   | 1 | 1 | 1  |

|      |                                      |                                                              |      |     |   |   |    |
|------|--------------------------------------|--------------------------------------------------------------|------|-----|---|---|----|
| 1454 | dsrrswapns_comp216836_c3_seq1        | len=3961                                                     | 2.13 | 2   | 1 | 1 | 1  |
| 1455 | CL952Contig1                         | CL952Contig1                                                 | 2.12 | 2   | 1 | 1 | 4  |
| 1456 | Q1W3Z6                               | Silencing mediator for retinoid and thyroid hormone recepto  | 2.12 | 9   | 4 | 4 | 4  |
| 1457 | Q8AVE7;CL3384Contig1                 | 1i973-prov protein OS=Xenopus laevis GN=gnl2 PE=2 SV=        | 2.12 | 1   | 1 | 1 | 2  |
| 1458 | zeinaSSns_comp386979_c1_seq2         | len=2448                                                     | 2.11 | 3   | 1 | 1 | 2  |
| 1459 | D8WX02;CL4813Contig1                 | Midline 1 OS=Xenopus laevis GN=mid1 PE=2 SV=1 - [D8W         | 2.10 | 1   | 1 | 1 | 3  |
| 1460 | Q6DDF7                               | MGC84593 protein OS=Xenopus laevis GN=atp13a4 PE=2           | 2.10 | 9   | 2 | 2 | 12 |
| 1461 | Q8AVF2;CL8795Contig2                 | MGC52738 protein OS=Xenopus laevis GN=tom111 PE=2 S          | 2.10 | 1   | 1 | 1 | 2  |
| 1462 | Q4V7X5                               | LOC733254 protein (Fragment) OS=Xenopus laevis GN=L(C        | 2.09 | 8   | 1 | 1 | 1  |
| 1463 | Q7ZY12;CL621Contig2                  | MGC52980 protein OS=Xenopus laevis GN=atp13a4 PE=2 S         | 2.09 | 2   | 1 | 1 | 37 |
| 1464 | Q1W9P0                               | Secretory pathway Ca,Mn-ATPase OS=Xenopus laevis GN          | 2.07 | 1   | 1 | 1 | 1  |
| 1465 | Q5U4W7                               | LOC495416 protein (Fragment) OS=Xenopus laevis GN=L(C        | 2.06 | 253 | 1 | 2 | 2  |
| 1466 | Q6P912;CL2377Contig1                 | MGC69046 protein OS=Xenopus laevis GN=col3a1 PE=2 S          | 2.05 | 3   | 1 | 2 | 3  |
| 1467 | Q640H2                               | LOC494715 protein OS=Xenopus laevis GN=scp2 PE=2 S           | 2.05 | 6   | 1 | 1 | 5  |
| 1468 | CL114Contig15                        | CL114Contig15                                                | 2.05 | 3   | 1 | 1 | 1  |
| 1469 | Q4A520;CL7515Contig1                 | Putative transient receptor potential channel OS=Xenopus l   | 2.04 | 1   | 1 | 1 | 2  |
| 1470 | Q66J73                               | MGC81714 protein OS=Xenopus laevis GN=abcf1 PE=2 S           | 2.03 | 3   | 1 | 1 | 2  |
| 1471 | A1L1H7                               | LOC733281 protein OS=Xenopus laevis GN=supt5h PE=2           | 2.03 | 1   | 1 | 1 | 1  |
| 1472 | Q6GMC9;dsrrswapns_comp211495_c1_seq2 | GMP reductase OS=Xenopus laevis GN=gmpr2 PE=2 SV=            | 2.02 | 4   | 1 | 1 | 2  |
| 1473 | Q7ZX69;CL1735Contig1                 | MGC52894 protein OS=Xenopus laevis GN=MGC52894 PE            | 2.02 | 3   | 1 | 1 | 2  |
| 1474 | Q6DCM5                               | Ppp4r1-prov protein OS=Xenopus laevis GN=ppp4r1 PE=2         | 2.01 | 1   | 1 | 1 | 1  |
| 1475 | Q7ZX18                               | MGC53357 protein OS=Xenopus laevis GN=arhgap11a.1 F          | 2.00 | 1   | 1 | 1 | 1  |
| 1476 | Q2EI21                               | RE1-silencing transcription factor A OS=Xenopus laevis GN    | 2.00 | 1   | 1 | 1 | 1  |
| 1477 | Q7ZVW0;CL4305Contig3                 | Kin-1-prov protein OS=Xenopus laevis GN=prkacb PE=2 S        | 1.99 | 3   | 1 | 1 | 2  |
| 1478 | Q66J54                               | Solute carrier family 22 member 6-A OS=Xenopus laevis Gi     | 1.97 | 1   | 1 | 1 | 2  |
| 1479 | Q9W6C5                               | Programmed cell death 6-interacting protein OS=Xenopus l     | 1.96 | 2   | 1 | 1 | 1  |
| 1480 | dsrrswapns_comp212594_c0_seq1        | len=1253                                                     | 1.96 | 1   | 1 | 1 | 3  |
| 1481 | CL2520Contig2                        | CL2520Contig2                                                | 1.96 | 1   | 1 | 1 | 1  |
| 1482 | CL8606Contig1                        | CL8606Contig1                                                | 1.96 | 1   | 1 | 1 | 2  |
| 1483 | Q6DDN9                               | Cbs-prov protein OS=Xenopus laevis GN=cbs PE=2 SV=1 -        | 1.96 | 2   | 1 | 1 | 2  |
| 1484 | Q6GN12                               | MGC83651 protein OS=Xenopus laevis GN=tbc1d4 PE=2 S          | 1.96 | 1   | 1 | 1 | 1  |
| 1485 | CL9204Contig1                        | CL9204Contig1                                                | 1.94 | 1   | 1 | 1 | 1  |
| 1486 | CL4783Contig2                        | CL4783Contig2                                                | 1.94 | 1   | 1 | 1 | 1  |
| 1487 | Q08AX1                               | LOC100158396 protein OS=Xenopus laevis GN=klh32 PE=          | 1.94 | 1   | 1 | 1 | 1  |
| 1488 | Q6GPX8                               | MGC82533 protein OS=Xenopus laevis GN=pafah2 PE=2 S          | 1.93 | 1   | 1 | 1 | 1  |
| 1489 | CL4122Contig1                        | CL4122Contig1                                                | 1.91 | 2   | 1 | 1 | 2  |
| 1490 | dsrrswapns_comp196398_c0_seq1        | len=1229                                                     | 1.90 | 1   | 1 | 1 | 1  |
| 1491 | O13124;CL7992Contig1                 | Vitamin D3 receptor OS=Xenopus laevis GN=vdr PE=2 SV=        | 1.90 | 2   | 1 | 1 | 4  |
| 1492 | B7ZRI3                               | Ret proto-oncogene OS=Xenopus laevis GN=ret-A PE=2 S         | 1.89 | 3   | 1 | 1 | 1  |
| 1493 | dsrrswapns_comp217428_c1_seq4        | len=5152                                                     | 1.89 | 2   | 1 | 1 | 1  |
| 1494 | Q6DCT2                               | UPF0668 protein C10orf76 homolog OS=Xenopus laevis Pl        | 1.89 | 1   | 1 | 1 | 1  |
| 1495 | Q8AVN8;CL1362Contig1                 | Cdc37-prov protein OS=Xenopus laevis GN=cdc37 PE=2 S         | 1.89 | 1   | 1 | 1 | 5  |
| 1496 | CL3689Contig1                        | CL3689Contig1                                                | 1.88 | 2   | 1 | 1 | 2  |
| 1497 | Q9PTE5                               | Phosphoinositide 3 kinase catalytic subunit (Fragment) OS=   | 1.88 | 4   | 1 | 1 | 10 |
| 1498 | dsrrswapns_comp217313_c0_seq59       | len=2833                                                     | 1.88 | 6   | 1 | 1 | 1  |
| 1499 | CL3458Contig1                        | CL3458Contig1                                                | 1.86 | 1   | 1 | 1 | 2  |
| 1500 | Q2TAV8;CL6367Contig1                 | Wdhd1 protein OS=Xenopus laevis GN=wdhd1 PE=2 SV=1           | 1.86 | 3   | 1 | 1 | 2  |
| 1501 | zeinaSSns_comp387425_c1_seq4         | len=3248                                                     | 1.85 | 2   | 1 | 1 | 1  |
| 1502 | CL4098Contig1                        | CL4098Contig1                                                | 1.83 | 3   | 1 | 1 | 1  |
| 1503 | B7ZRM8                               | MDS1 and EVI1 complex locus protein EVI1-B OS=Xenopu         | 1.81 | 1   | 1 | 1 | 1  |
| 1504 | CL3472Contig1                        | CL3472Contig1                                                | 1.81 | 2   | 2 | 2 | 2  |
| 1505 | D3IUT5                               | Treslin OS=Xenopus laevis GN=ticrr PE=1 SV=1 - [TICRR_       | 1.81 | 1   | 1 | 1 | 1  |
| 1506 | zeinaSSns_comp388845_c0_seq6         | len=3172                                                     | 1.80 | 6   | 1 | 1 | 1  |
| 1507 | Q5FWX5                               | MGC98794 protein OS=Xenopus laevis GN=MGC98794 PE            | 1.79 | 1   | 1 | 1 | 1  |
| 1508 | CL119Contig4                         | CL119Contig4                                                 | 1.77 | 1   | 1 | 1 | 1  |
| 1509 | CL212Contig6                         | CL212Contig6                                                 | 1.74 | 3   | 2 | 2 | 7  |
| 1510 | Q569Z1                               | Eukaryotic translation initiation factor 3 subunit B OS=Xeno | 1.74 | 1   | 1 | 1 | 1  |
| 1511 | Q6PCI5                               | Mtmr3 protein OS=Xenopus laevis GN=Mtmr3 PE=2 SV=1           | 1.72 | 1   | 1 | 1 | 1  |
| 1512 | CL4408Contig3                        | CL4408Contig3                                                | 1.71 | 1   | 1 | 1 | 1  |
| 1513 | Q6NUC6;CL25Contig6                   | Roquin OS=Xenopus laevis GN=rc3h1 PE=2 SV=1 - [RC3H          | 1.71 | 4   | 1 | 1 | 4  |
| 1514 | B7ZQN6;CL688Contig4                  | Ctnn protein OS=Xenopus laevis GN=Ctnn PE=2 SV=1 - [B7       | 1.70 | 9   | 1 | 1 | 2  |
| 1515 | A9UMM8                               | LOC100137686 protein OS=Xenopus laevis GN=khynyn PE=         | 1.69 | 1   | 1 | 1 | 1  |
| 1516 | CL10344Contig2                       | CL10344Contig2                                               | 1.69 | 201 | 1 | 2 | 4  |
| 1517 | Q5U4V0                               | LOC495494 protein OS=Xenopus laevis GN=tnpo1 PE=2 S          | 1.69 | 253 | 1 | 2 | 2  |
| 1518 | CL8672Contig1                        | CL8672Contig1                                                | 1.68 | 1   | 1 | 1 | 2  |
| 1519 | CL11069Contig2                       | CL11069Contig2                                               | 1.67 | 1   | 1 | 1 | 1  |
| 1520 | Q642N7                               | LOC446968 protein (Fragment) OS=Xenopus laevis GN=L(C        | 1.65 | 2   | 1 | 1 | 1  |
| 1521 | Q66JA4                               | MGC81147 protein OS=Xenopus laevis GN=MGC81147 PE            | 1.65 | 1   | 1 | 1 | 2  |
| 1522 | dsrrswapns_comp214315_c4_seq3        | len=2467                                                     | 1.64 | 3   | 1 | 1 | 1  |
| 1523 | CL1459Contig2                        | CL1459Contig2                                                | 1.64 | 2   | 1 | 1 | 4  |
| 1524 | CL1649Contig3                        | CL1649Contig3                                                | 1.63 | 2   | 1 | 1 | 4  |
| 1525 | Q8QHA5;CL6103Contig1                 | DNA replication ATP-dependent helicase/nuclease DNA2 C       | 1.61 | 1   | 1 | 1 | 2  |
| 1526 | CL3741Contig1                        | CL3741Contig1                                                | 1.60 | 2   | 1 | 1 | 2  |
| 1527 | CL971Contig9                         | CL971Contig9                                                 | 1.59 | 4   | 1 | 1 | 1  |
| 1528 | CL170Contig6                         | CL170Contig6                                                 | 1.59 | 1   | 1 | 1 | 2  |
| 1529 | dsrrswapns_comp217415_c3_seq4        | len=3082                                                     | 1.57 | 3   | 1 | 1 | 1  |
| 1530 | CL7944Contig1                        | CL7944Contig1                                                | 1.57 | 2   | 1 | 1 | 1  |
| 1531 | CL7517Contig1                        | CL7517Contig1                                                | 1.55 | 1   | 1 | 1 | 1  |
| 1532 | Q6IR70                               | Protein phosphatase 1 regulatory subunit 21 OS=Xenopus l     | 1.55 | 1   | 1 | 1 | 2  |
| 1533 | CL2535Contig5                        | CL2535Contig5                                                | 1.53 | 2   | 1 | 1 | 1  |
| 1534 | CL1930Contig6                        | CL1930Contig6                                                | 1.52 | 201 | 1 | 2 | 3  |
| 1535 | Q6NU36                               | MGC81278 protein OS=Xenopus laevis GN=anapc4 PE=2            | 1.52 | 1   | 1 | 1 | 1  |
| 1536 | B7ZRE7                               | Breast and ovarian cancer susceptibility protein OS=Xenopi   | 1.52 | 2   | 1 | 1 | 1  |
| 1537 | Q641H7                               | MGC81565 protein OS=Xenopus laevis GN=lats1 PE=2 SV          | 1.52 | 1   | 1 | 1 | 1  |
| 1538 | Q7ZJW1                               | SYNE1 protein (Fragment) OS=Xenopus laevis GN=SYNE1          | 1.52 | 1   | 1 | 1 | 1  |
| 1539 | Q2TAQ2                               | LOC733439 protein (Fragment) OS=Xenopus laevis GN=L(C        | 1.51 | 1   | 1 | 1 | 1  |

|      |                               |                                                            |      |     |   |   |   |    |
|------|-------------------------------|------------------------------------------------------------|------|-----|---|---|---|----|
| 1540 | P42291                        | D(1C) dopamine receptor OS=Xenopus laevis GN=drd1c P       | 1.51 |     | 1 | 1 | 1 | 1  |
| 1541 | Q6P7F7                        | MGC68765 protein OS=Xenopus laevis GN=smtn PE=2 SV         | 1.50 | 291 |   | 1 | 2 | 4  |
| 1542 | CL1096Contig1                 | CL1096Contig1                                              | 1.50 |     | 2 | 1 | 1 | 1  |
| 1543 | Q0IHJ9                        | MGC154309 protein OS=Xenopus laevis GN=nsun6 PE=2          | 1.50 |     | 1 | 1 | 1 | 1  |
| 1544 | dsrrswapns_comp210557_c0_seq1 | len=1322                                                   | 1.50 |     | 1 | 1 | 1 | 1  |
| 1545 | P08759;CL504Contig3           | Serum albumin A OS=Xenopus laevis GN=alb-a PE=2 SV=        | 1.49 |     | 9 | 1 | 1 | 7  |
| 1546 | Q7ZXZ0                        | Zygotic DNA replication licensing factor mcm3 OS=Xenopu    | 1.49 |     | 2 | 1 | 1 | 4  |
| 1547 | Q801Q1                        | MGC53743 protein OS=Xenopus laevis GN=rrp1b PE=2 SV        | 1.47 |     | 4 | 1 | 1 | 2  |
| 1548 | zeinaSSns_comp386267_c0_seq1  | len=6035                                                   | 1.47 |     | 2 | 1 | 1 | 1  |
| 1549 | A1L2R9                        | Putative uncharacterized protein OS=Xenopus laevis PE=2    | 1.46 |     | 2 | 1 | 1 | 1  |
| 1550 | Q6NS25;CL8312Contig1          | MGC78791 protein OS=Xenopus laevis GN=ints2 PE=2 SV        | 1.45 |     | 1 | 1 | 1 | 3  |
| 1551 | P20310                        | Neural cadherin-1 OS=Xenopus laevis PE=2 SV=1 - [CADH      | 1.44 |     | 5 | 1 | 1 | 31 |
| 1552 | CL2010Contig3                 | CL2010Contig3                                              | 1.44 |     | 3 | 1 | 1 | 4  |
| 1553 | Q641G4                        | Condensin-2 complex subunit H2 OS=Xenopus laevis GN=       | 1.44 |     | 1 | 1 | 1 | 2  |
| 1554 | Q641B0;CL3581Contig2          | Dmd protein OS=Xenopus laevis GN=dmd.1 PE=2 SV=1 -         | 1.42 |     | 8 | 1 | 1 | 3  |
| 1555 | CL4320Contig3                 | CL4320Contig3                                              | 1.41 |     | 1 | 1 | 1 | 1  |
| 1556 | CL4793Contig1                 | CL4793Contig1                                              | 1.37 |     | 1 | 1 | 1 | 1  |
| 1557 | P70049                        | Origin recognition complex protein 1 OS=Xenopus laevis G   | 1.35 |     | 2 | 1 | 1 | 1  |
| 1558 | CL19729Contig1                | CL19729Contig1                                             | 1.35 |     | 1 | 1 | 1 | 1  |
| 1559 | dsrrswapns_comp217626_c0_seq5 | len=5041                                                   | 1.35 |     | 1 | 1 | 1 | 2  |
| 1560 | D5JEJ8                        | Afadin OS=Xenopus laevis GN=mlt4 PE=2 SV=1 - [D5JEJ8       | 1.35 |     | 1 | 1 | 1 | 1  |
| 1561 | CL821Contig1                  | CL821Contig1                                               | 1.34 |     | 2 | 1 | 1 | 1  |
| 1562 | Q6INP8                        | Mediator of RNA polymerase II transcription subunit 1 OS=) | 1.34 |     | 1 | 1 | 1 | 1  |
| 1563 | Q6DFC7                        | LOC445830 protein (Fragment) OS=Xenopus laevis GN=L(       | 1.34 | 296 |   | 1 | 2 | 3  |
| 1564 | CL2547Contig3                 | CL2547Contig3                                              | 1.33 |     | 1 | 1 | 1 | 1  |
| 1565 | Q6GN44                        | LOC443684 protein (Fragment) OS=Xenopus laevis GN=L(       | 1.33 |     | 1 | 1 | 1 | 3  |
| 1566 | Q641C5                        | MGC82112 protein OS=Xenopus laevis GN=MGC82112 PE          | 1.33 |     | 4 | 1 | 1 | 1  |
| 1567 | Q5U4N0                        | LOC495463 protein (Fragment) OS=Xenopus laevis GN=L(       | 1.32 |     | 2 | 1 | 1 | 3  |
| 1568 | CL800Contig5                  | CL800Contig5                                               | 1.31 |     | 2 | 1 | 1 | 1  |
| 1569 | CL20539Contig1                | CL20539Contig1                                             | 1.31 |     | 1 | 1 | 1 | 1  |
| 1570 | CL5444Contig1                 | CL5444Contig1                                              | 1.30 |     | 4 | 1 | 1 | 1  |
| 1571 | CL11289Contig1                | CL11289Contig1                                             | 1.30 |     | 2 | 1 | 1 | 1  |
| 1572 | A8E0R9                        | Glutamate receptor-interacting protein 2 OS=Xenopus laevi  | 1.29 |     | 1 | 1 | 1 | 1  |
| 1573 | CL465Contig2                  | CL465Contig2                                               | 1.29 |     | 1 | 1 | 1 | 1  |
| 1574 | E5LG93                        | Centrosomal protein OS=Xenopus laevis GN=cep192 PE=2       | 1.29 |     | 1 | 1 | 1 | 1  |
| 1575 | zeinaSSns_comp386803_c0_seq3  | len=4262                                                   | 1.28 |     | 5 | 1 | 1 | 2  |
| 1576 | P26363                        | Cystic fibrosis transmembrane conductance regulator OS=>   | 1.28 |     | 1 | 1 | 1 | 2  |
| 1577 | CL3824Contig1                 | CL3824Contig1                                              | 1.28 |     | 1 | 1 | 1 | 1  |
| 1578 | Q6NU33                        | MGC81285 protein OS=Xenopus laevis GN=eps8 PE=2 SV         | 1.27 |     | 1 | 1 | 1 | 1  |
| 1579 | Q6NU54;CL2259Contig1          | MGC81241 protein OS=Xenopus laevis GN=tsc22d2 PE=2         | 1.27 |     | 3 | 1 | 1 | 9  |
| 1580 | CL2871Contig3                 | CL2871Contig3                                              | 1.26 |     | 1 | 1 | 1 | 8  |
| 1581 | B7ZSB1                        | Putative uncharacterized protein OS=Xenopus laevis PE=2    | 1.26 |     | 2 | 1 | 1 | 1  |
| 1582 | A5PKN6;CL3181Contig1          | LOC100101289 protein OS=Xenopus laevis GN=fam13a P         | 1.26 |     | 3 | 1 | 1 | 10 |
| 1583 | Q6DDG3                        | Pik4ca-prov protein OS=Xenopus laevis GN=pi4ka PE=2 S      | 1.26 |     | 1 | 1 | 1 | 1  |
| 1584 | Q6NRC4                        | LOC431827 protein (Fragment) OS=Xenopus laevis GN=L(       | 1.26 | 228 |   | 1 | 2 | 2  |
| 1585 | B2DCQ5;CL597Contig2           | Cdc25B phosphatase OS=Xenopus laevis GN=cdc25b PE=         | 1.25 |     | 2 | 1 | 1 | 3  |
| 1586 | CL6498Contig1                 | CL6498Contig1                                              | 1.25 |     | 2 | 1 | 1 | 2  |
| 1587 | Q6DCU8                        | LOC397741 protein OS=Xenopus laevis GN=LOC397741 F         | 1.25 | 291 |   | 1 | 2 | 3  |
| 1588 | Q66KF0;CL6164Contig1          | MGC86497 protein OS=Xenopus laevis GN=ppp1r13l PE=2        | 1.24 |     | 2 | 1 | 1 | 3  |
| 1589 | CL9436Contig1                 | CL9436Contig1                                              | 1.23 |     | 1 | 1 | 1 | 1  |
| 1590 | Q6DFG3;TC413472               | MGC83673 protein OS=Xenopus laevis GN=MGC83673 PE          | 1.22 |     | 3 | 1 | 1 | 3  |
| 1591 | CL11908Contig1                | CL11908Contig1                                             | 1.22 |     | 1 | 1 | 1 | 1  |
| 1592 | O93308                        | Structural maintenance of chromosomes protein 1A OS=Xe     | 1.22 | 253 |   | 1 | 2 | 2  |
| 1593 | Q4V7Y7                        | Katanin p80 WD40-containing subunit B1 OS=Xenopus lae      | 1.22 |     | 1 | 1 | 1 | 1  |
| 1594 | A8CWK9                        | Low density lipoprotein-related protein 2 (Fragment) OS=Xe | 1.22 |     | 3 | 1 | 1 | 1  |
| 1595 | Q7ZT76                        | IQ motif containing GTPase activating protein 2 OS=Xenopi  | 1.20 | 544 |   | 1 | 3 | 3  |
| 1596 | CL7560Contig1                 | CL7560Contig1                                              | 1.20 |     | 2 | 1 | 1 | 1  |
| 1597 | Q6GPA3                        | LOC443632 protein (Fragment) OS=Xenopus laevis GN=L(       | 1.20 |     | 3 | 1 | 1 | 1  |
| 1598 | Q6GQD1                        | Cytoplasmic FMR1-interacting protein 2 OS=Xenopus laevi    | 1.20 | 227 |   | 1 | 2 | 2  |
| 1599 | Q5XGZ5                        | LOC495108 protein OS=Xenopus laevis GN=snx18 PE=2 S        | 1.19 |     | 1 | 1 | 1 | 1  |
| 1600 | Q6PF33                        | Mmp9 protein OS=Xenopus laevis GN=mmp9 PE=2 SV=1 -         | 1.19 |     | 3 | 1 | 1 | 1  |
| 1601 | Q6JDF3                        | Schnurri 2 (Fragment) OS=Xenopus laevis PE=2 SV=1 - [      | 1.18 |     | 2 | 1 | 1 | 3  |
| 1602 | Q6DCY9;CL8574Contig1          | HAUS augmin-like complex subunit 3 OS=Xenopus laevis C     | 1.17 |     | 1 | 1 | 1 | 4  |
| 1603 | A6QL57                        | LOC100125670 protein (Fragment) OS=Xenopus laevis GN       | 1.16 |     | 4 | 1 | 1 | 2  |
| 1604 | CL1161Contig2                 | CL1161Contig2                                              | 1.15 |     | 3 | 1 | 1 | 1  |
| 1605 | Q642P2                        | Protein dopey-2 OS=Xenopus laevis GN=dopey2 PE=2 SV:       | 1.15 |     | 1 | 1 | 1 | 1  |
| 1606 | CL508Contig4                  | CL508Contig4                                               | 1.14 |     | 1 | 1 | 1 | 1  |
| 1607 | Q6GM70                        | LOC443696 protein (Fragment) OS=Xenopus laevis GN=L(       | 1.13 |     | 3 | 1 | 1 | 3  |
| 1608 | CL2693Contig2                 | CL2693Contig2                                              | 1.12 |     | 2 | 1 | 1 | 2  |
| 1609 | Q6GNU6                        | MGC80868 protein OS=Xenopus laevis GN=apaf1 PE=2 S'        | 1.12 | 291 |   | 1 | 2 | 2  |
| 1610 | Q8AVN3                        | Kiaa0010-prov protein OS=Xenopus laevis GN=ube3c PE=       | 1.11 |     | 1 | 1 | 1 | 1  |
| 1611 | Q5HZP4;CL1727Contig2          | LOC496341 protein OS=Xenopus laevis GN=ppp1r13b PE=        | 1.11 |     | 1 | 1 | 1 | 7  |
| 1612 | Q5XG51                        | LOC495282 protein (Fragment) OS=Xenopus laevis GN=L(       | 1.10 |     | 1 | 1 | 1 | 1  |
| 1613 | CL657Contig3                  | CL657Contig3                                               | 1.10 |     | 2 | 1 | 1 | 1  |
| 1614 | Q6AX83                        | MGC82093 protein OS=Xenopus laevis GN=lars PE=2 SV=        | 1.10 |     | 1 | 1 | 1 | 1  |
| 1615 | A1L1G6;CL1072Contig1          | LOC100036836 protein OS=Xenopus laevis GN=kiaa0182         | 1.07 |     | 4 | 1 | 1 | 2  |
| 1616 | CL7022Contig2                 | CL7022Contig2                                              | 1.04 |     | 2 | 1 | 1 | 1  |
| 1617 | CL5186Contig1                 | CL5186Contig1                                              | 1.03 |     | 2 | 1 | 1 | 1  |
| 1618 | Q6DKD7                        | Coatome subunit gamma-2 OS=Xenopus laevis GN=copp2         | 1.03 |     | 1 | 1 | 1 | 2  |
| 1619 | Q66J90                        | Histone-lysine N-methyltransferase SETD1B OS=Xenopus       | 1.03 |     | 1 | 1 | 1 | 1  |
| 1620 | O73732                        | Rho-associated kinase alpha OS=Xenopus laevis GN=rock:     | 1.02 |     | 2 | 1 | 2 | 3  |
| 1621 | Q6GPX6;CL1066Contig1          | MGC82535 protein OS=Xenopus laevis GN=fam129b PE=2         | 1.01 |     | 4 | 1 | 1 | 6  |
| 1622 | B7ZSK0                        | Structural maintenance of chromosomes protein OS=Xenop     | 1.01 |     | 2 | 1 | 1 | 1  |
| 1623 | CL15423Contig1                | CL15423Contig1                                             | 1.01 |     | 2 | 1 | 1 | 1  |
| 1624 | Q6NTR6                        | Ubiquitin carboxyl-terminal hydrolase 44-A OS=Xenopus lae  | 1.01 |     | 1 | 1 | 1 | 1  |
| 1625 | Q6DE48;CL1839Contig1          | Rbbp5-prov protein OS=Xenopus laevis GN=rbbp5 PE=2 S       | 1.00 | 26  |   | 1 | 1 | 4  |

|      |                                                       |                                                              |      |     |   |   |    |
|------|-------------------------------------------------------|--------------------------------------------------------------|------|-----|---|---|----|
| 1626 | dsrrswapns_comp216663_c2_seq9                         | len=3510                                                     | 1.00 | 4   | 1 | 1 | 1  |
| 1627 | Q6GPD0                                                | Rho GTPase-activating protein 32 OS=Xenopus laevis GN=       | 0.98 | 1   | 1 | 1 | 1  |
| 1628 | CL2453Contig4                                         | CL2453Contig4                                                | 0.97 | 2   | 2 | 2 | 2  |
| 1629 | CL3547Contig2                                         | CL3547Contig2                                                | 0.97 | 2   | 1 | 1 | 1  |
| 1630 | Q6GM46;CL3306Contig3                                  | MGC83972 protein OS=Xenopus laevis GN=pde4b PE=2 S           | 0.97 | 2   | 1 | 1 | 4  |
| 1631 | Q6AXA7                                                | MGC80263 protein OS=Xenopus laevis GN=prpf6 PE=2 SV          | 0.95 | 1   | 1 | 1 | 1  |
| 1632 | B7ZS80;CL2280Contig1                                  | Tyrosine-protein kinase receptor OS=Xenopus laevis GN=L      | 0.95 | 4   | 1 | 1 | 2  |
| 1633 | Q2V0J3;CL661Contig1                                   | Semaphorin 6D4 OS=Xenopus laevis GN=sema6d PE=2 S            | 0.92 | 6   | 1 | 1 | 2  |
| 1634 | Q91684                                                | DNA polymerase subunit gamma-1 OS=Xenopus laevis GN          | 0.92 | 1   | 1 | 1 | 1  |
| 1635 | A2RV71                                                | LOC100037140 protein OS=Xenopus laevis GN=LOC1000            | 0.91 | 2   | 1 | 1 | 2  |
| 1636 | CL13558Contig1                                        | CL13558Contig1                                               | 0.90 | 1   | 1 | 1 | 2  |
| 1637 | CL11836Contig1                                        | CL11836Contig1                                               | 0.89 | 1   | 1 | 1 | 1  |
| 1638 | zeinaSSns_comp384061_c2_seq2                          | len=4918                                                     | 0.89 | 2   | 1 | 1 | 3  |
| 1639 | Q3KQ57                                                | MGC130942 protein OS=Xenopus laevis GN=trappc12 PE=          | 0.89 | 1   | 1 | 1 | 1  |
| 1640 | CL12958Contig1                                        | CL12958Contig1                                               | 0.88 | 1   | 1 | 1 | 1  |
| 1641 | CL112Contig13                                         | CL112Contig13                                                | 0.86 | 3   | 1 | 1 | 1  |
| 1642 | Q91829                                                | V(D)J recombination-activating protein 1 OS=Xenopus laev     | 0.86 | 1   | 1 | 1 | 1  |
| 1643 | Q5661I                                                | INO80 complex subunit D OS=Xenopus laevis GN=ino80 l         | 0.86 | 1   | 1 | 1 | 1  |
| 1644 | Q6GQ04                                                | MGC80529 protein OS=Xenopus laevis GN=cdc27 PE=1 S           | 0.84 | 2   | 1 | 1 | 6  |
| 1645 | zeinaSSns_comp389497_c1_seq2                          | len=5283                                                     | 0.83 | 2   | 1 | 1 | 1  |
| 1646 | CL1424Contig5                                         | CL1424Contig5                                                | 0.82 | 1   | 1 | 1 | 1  |
| 1647 | dsrrswapns_comp217958_c1_seq1                         | len=15803                                                    | 0.82 | 3   | 2 | 2 | 9  |
| 1648 | Q6PF79;CL1865Contig1                                  | Ctcf protein OS=Xenopus laevis GN=ctcf PE=2 SV=1 - [Q6       | 0.82 | 8   | 1 | 1 | 2  |
| 1649 | CL9010Contig1                                         | CL9010Contig1                                                | 0.77 | 1   | 1 | 1 | 5  |
| 1650 | dsrrswapns_comp207902_c1_seq2                         | len=6129                                                     | 0.77 | 1   | 1 | 1 | 1  |
| 1651 | Q5XGY6                                                | LOC495114 protein OS=Xenopus laevis GN=fhod1 PE=2 S          | 0.75 | 1   | 1 | 1 | 1  |
| 1652 | Q5FWQ3                                                | LOC733157 protein (Fragment) OS=Xenopus laevis GN=L          | 0.75 | 1   | 1 | 1 | 2  |
| 1653 | AOJMU7                                                | Zswim4_predicted protein OS=Xenopus laevis GN=zswim4         | 0.73 | 2   | 1 | 1 | 2  |
| 1654 | A1L1H0                                                | LOC100036839 protein OS=Xenopus laevis GN=rere PE=2          | 0.72 | 1   | 1 | 1 | 1  |
| 1655 | Q640I9                                                | Lysine-specific demethylase 2B OS=Xenopus laevis GN=kc       | 0.71 | 1   | 1 | 1 | 1  |
| 1656 | CL9129Contig1                                         | CL9129Contig1                                                | 0.70 | 1   | 1 | 1 | 1  |
| 1657 | Q860P5;CL387Contig2                                   | Bat2-prov protein OS=Xenopus laevis GN=prcc2a PE=2 SV        | 0.69 | 8   | 1 | 1 | 2  |
| 1658 | Q6AZS3                                                | Uty-prov protein OS=Xenopus laevis GN=kdm6a PE=2 SV=         | 0.69 | 1   | 1 | 1 | 1  |
| 1659 | Q7ZWK4                                                | LOC398587 protein (Fragment) OS=Xenopus laevis GN=L          | 0.69 | 1   | 1 | 1 | 1  |
| 1660 | Q1XG43;CL46Contig7                                    | Scc2-2A OS=Xenopus laevis GN=SCC2-2 PE=2 SV=1 - [Q           | 0.67 | 4   | 1 | 1 | 2  |
| 1661 | CL6529Contig1                                         | CL6529Contig1                                                | 0.65 | 1   | 1 | 1 | 1  |
| 1662 | Q5MPPF8                                               | Ataxia telangiectasia mutated OS=Xenopus laevis GN=atm       | 0.65 | 252 | 1 | 2 | 2  |
| 1663 | Q9IBG7                                                | Kielin/chordin-like protein OS=Xenopus laevis GN=kcp PE=     | 0.64 | 1   | 1 | 1 | 1  |
| 1664 | Q6DFG4;CL2111Contig1                                  | MGC83457 protein OS=Xenopus laevis GN=ephb3 PE=2 S           | 0.62 | 4   | 1 | 1 | 4  |
| 1665 | Q6GN08                                                | LOC398742 protein OS=Xenopus laevis GN=ncapd3 PE=2           | 0.60 | 1   | 1 | 1 | 1  |
| 1666 | dsrrswapns_comp217697_c0_seq6                         | len=5729                                                     | 0.59 | 1   | 1 | 1 | 11 |
| 1667 | Q6GQ76;CL4342Contig3                                  | Cap-specific mRNA (nucleoside-2'-O-)-methyltransferase 1     | 0.59 | 8   | 1 | 1 | 2  |
| 1668 | CL11854Contig1                                        | CL11854Contig1                                               | 0.56 | 1   | 1 | 1 | 4  |
| 1669 | D0PPG1                                                | Costal2 OS=Xenopus laevis GN=Cos2 PE=2 SV=1 - [D0PP          | 0.56 | 4   | 1 | 1 | 1  |
| 1670 | Q6INA9                                                | Histone-lysine N-methyltransferase SETDB1 OS=Xenopus         | 0.55 | 1   | 1 | 1 | 2  |
| 1671 | CL165Contig4                                          | CL165Contig4                                                 | 0.52 | 1   | 1 | 1 | 1  |
| 1672 | Q6DFF2                                                | Brd4-prov protein OS=Xenopus laevis GN=brd4 PE=2 SV=         | 0.51 | 2   | 1 | 1 | 3  |
| 1673 | CL760Contig2                                          | CL760Contig2                                                 | 0.46 | 7   | 1 | 1 | 1  |
| 1674 | CL825Contig2                                          | CL825Contig2                                                 | 0.46 | 1   | 1 | 1 | 1  |
| 1675 | B7ZSC6;CL817Contig2                                   | Slit2-a protein OS=Xenopus laevis GN=slit2-a PE=2 SV=1 -     | 0.46 | 2   | 1 | 1 | 2  |
| 1676 | zeinaSSns_comp389539_c1_seq3                          | len=5153                                                     | 0.43 | 3   | 1 | 1 | 2  |
| 1677 | dsrrswapns_comp216350_c2_seq3                         | len=6139                                                     | 0.43 | 1   | 1 | 1 | 1  |
| 1678 | Q5U248;CL1238Contig1                                  | LOC495689 protein OS=Xenopus laevis GN=crebbp PE=2           | 0.41 | 6   | 1 | 1 | 3  |
| 1679 | CL742Contig3                                          | CL742Contig3                                                 | 0.40 | 1   | 1 | 1 | 61 |
| 1680 | Q9DDN8                                                | Gravin-like OS=Xenopus laevis GN=akap12 PE=2 SV=1 - [        | 0.28 | 1   | 1 | 1 | 1  |
| 1681 | dsrrswapns_comp215471_c0_seq2                         | len=8484                                                     | 0.27 | 3   | 1 | 1 | 1  |
| 1682 | CL5147Contig1                                         | CL5147Contig1                                                | 0.26 | 1   | 1 | 1 | 1  |
| 1683 | dsrrswapns_comp213817_c0_seq2                         | len=15316                                                    | 0.19 | 4   | 1 | 1 | 18 |
| 1684 | Q4G444                                                | Polycystic kidney disease protein 1 (Fragment) OS=Xenopu     | 0.09 | 252 | 1 | 2 | 2  |
| 1685 | CL30361Contig1                                        | CL30361Contig1                                               | 0.00 | 5   | 1 | 2 | 2  |
| 1686 | CL4370Contig2                                         | CL4370Contig2                                                | 0.00 | 1   | 1 | 1 | 1  |
| 1687 | DC044722 similar to UniRef100_A6QM14 Cluster: CCDC    | Rep: CCDC95 protein - Bos taurus (Bovine), partial (27%)     | 0.00 | 1   | 1 | 1 | 1  |
| 1688 | DC050368 homologue to UniRef100_UPI00069F0BD C        | Rep: Filamin-B (FLN-B) (Beta-flamin) (Actin-binding-like pr  | 0.00 | 1   | 1 | 1 | 1  |
| 1689 | TC468263 similar to UniRef100_Q6PAB2 Cluster: MGC6    | Rep: MGC68737 protein - Xenopus laevis (African clawed f     | 0.00 | 1   | 1 | 1 | 1  |
| 1690 | BJ035035 UniRef100_Q6DD19 Cluster: MGC80437 prote     | Rep: MGC80437 protein - Xenopus laevis (African clawed f     | 0.00 | 1   | 1 | 1 | 1  |
| 1691 | TC468342 weakly similar to UniRef100_A7SS16 Cluster:  | Rep: Predicted protein - Nematostella vectensis (Starlet sea | 0.00 | 1   | 1 | 1 | 1  |
| 1692 | BJ072460                                              | BJ072460                                                     | 0.00 | 1   | 1 | 1 | 6  |
| 1693 | CL1004Contig2                                         | CL1004Contig2                                                | 0.00 | 1   | 1 | 1 | 1  |
| 1694 | CL122Contig3                                          | CL122Contig3                                                 | 0.00 | 1   | 1 | 1 | 1  |
| 1695 | CL3782Contig1                                         | CL3782Contig1                                                | 0.00 | 2   | 1 | 1 | 1  |
| 1696 | CL467Contig1                                          | CL467Contig1                                                 | 0.00 | 1   | 1 | 1 | 2  |
| 1697 | CL46Contig4                                           | CL46Contig4                                                  | 0.00 | 1   | 1 | 1 | 1  |
| 1698 | TC428802 UniRef100_Q5MMR9 Cluster: Brg1; n=1; Xen     | Rep: Brg1 - Xenopus laevis (African clawed frog), partial (2 | 0.00 | 1   | 1 | 1 | 1  |
| 1699 | BF611644 similar to UniRef100_Q58F92 Cluster: Cytochl | Rep: Cytochrome c oxidase subunit I - Bradypus tridactylus   | 0.00 | 1   | 1 | 1 | 1  |
| 1700 | BG235002 similar to UniRef100_P08778 Cluster: Keratin | Rep: Keratin, type I cytoskeletal 47 kDa - Xenopus laevis (A | 0.00 | 1   | 1 | 1 | 1  |
| 1701 | DC062871 homologue to UniRef100_Q8AVT6 Cluster: M     | Rep: MGC52847 protein - Xenopus laevis (African clawed f     | 0.00 | 2   | 2 | 2 | 2  |
| 1702 | TC463837 homologue to UniRef100_Q6NRS7 Cluster: M     | Rep: MGC81523 protein - Xenopus laevis (African clawed f     | 0.00 | 1   | 1 | 1 | 3  |
| 1703 | TC440393 similar to UniRef100_Q7T0T9 Cluster: Pla2g4  | Rep: Pla2g4a protein - Xenopus laevis (African clawed frog   | 0.00 | 1   | 1 | 2 | 2  |
| 1704 | TC424140 homologue to UniRef100_Q7ZZH7 Cluster: Pr    | Rep: Protein DBF4 homolog A - Xenopus laevis (African cla    | 0.00 | 1   | 1 | 1 | 1  |
| 1705 | BI349541 homologue to UniRef100_Q6AZH2 Cluster: SIP   | Rep: SIPA1L1 protein - Xenopus laevis (African clawed frog)  | 0.00 | 1   | 1 | 1 | 1  |
| 1706 | TC444576 homologue to UniRef100_UPI00004D667C Cl      | Rep: Uncharacterized protein C6orf145. - Xenopus tropicali   | 0.00 | 1   | 1 | 1 | 1  |
| 1707 | CA974276 similar to UniRef100_Q568S8 Cluster: Zgc:11  | Rep: Zgc:110113 - Danio rerio (Zebrafish) (Brachydanio rer   | 0.00 | 1   | 1 | 1 | 4  |
| 1708 | BG023428 similar to UniRef100_A0JPF1 Cluster: Zgc:15  | Rep: Zgc:153686 - Danio rerio (Zebrafish) (Brachydanio rer   | 0.00 | 1   | 1 | 2 | 2  |
| 1709 | Q71N44                                                | Transcription factor IIA large subunit OS=Xenopus laevis G   | 0.00 | 1   | 1 | 1 | 1  |

**Table S4.** Representative 45 different proteins with significant differential expression between D11, V11, and V21 cell types. Protein abundance was calculated based on emPAI and median-normalized before analysis by ANOVA-Fisher's LSD.

| Accession Number           | Description                         | p value    | -Log(p) | FDR     | Fisher's LSD                    |
|----------------------------|-------------------------------------|------------|---------|---------|---------------------------------|
| CL640Contig6               | CL640Contig6                        | 0.00028629 | 3.5432  | 0.24249 | V21 - D11; V21 - V11            |
| CL10183Contig1             | CL10183Contig1                      | 0.0018743  | 2.7272  | 0.36129 | D11 - V11; V21 - V11            |
| Q8AVH2                     | Ckb-prov protein OS=Xenopus lae     | 0.0022181  | 2.654   | 0.36129 | D11 - V11; V21 - V11            |
| CL6407Contig1              | CL6407Contig1                       | 0.0017882  | 2.7476  | 0.36129 | D11 - V11; V21 - V11            |
| CL2028Contig2              | CL2028Contig2                       | 0.0025593  | 2.5919  | 0.36129 | D11 - V11; D11 - V21; V21 - V11 |
| CL81Contig10               | CL81Contig10                        | 0.002426   | 2.6151  | 0.36129 | D11 - V11; D11 - V21            |
| Q6P699                     | MGC68562 protein OS=Xenopus lae     | 0.0094998  | 2.0223  | 0.57188 | V11 - D11; V21 - D11            |
| Q6GMC1                     | MGC81889 protein OS=Xenopus lae     | 0.018068   | 1.7431  | 0.57188 | V11 - D11; V21 - D11            |
| A3KMT2                     | Death-associated protein-like 1-A ( | 0.016696   | 1.7774  | 0.57188 | V21 - D11                       |
| TC447025 homologue to Un   | Rep: L-lactate dehydrogenase B cl   | 0.016565   | 1.7808  | 0.57188 | V11 - D11; V11 - V21            |
| Q66KY9                     | MGC85306 protein OS=Xenopus lae     | 0.032993   | 1.4816  | 0.57188 | V11 - D11; V21 - D11            |
| Q9W711                     | Activated protein kinase C recepto  | 0.016443   | 1.784   | 0.57188 | V11 - D11; V11 - V21            |
| Q9PTK6                     | Perilipin OS=Xenopus laevis GN=f    | 0.014578   | 1.8363  | 0.57188 | V21 - D11; V21 - V11            |
| CL3329Contig1              | CL3329Contig1                       | 0.0055328  | 2.2571  | 0.57188 | D11 - V11; V21 - V11            |
| CL4718Contig1              | CL4718Contig1                       | 0.0060192  | 2.2205  | 0.57188 | D11 - V11; V21 - V11            |
| Q6PAB3                     | Malate dehydrogenase, cytoplasm     | 0.011283   | 1.9476  | 0.57188 | D11 - V11; D11 - V21            |
| Q6PH94                     | 40S ribosomal protein S12 OS=Xe     | 0.018928   | 1.7229  | 0.57188 | D11 - V11                       |
| Q6GPU5                     | MGC82602 protein OS=Xenopus lae     | 0.017152   | 1.7657  | 0.57188 | D11 - V11; D11 - V21            |
| P26642                     | Elongation factor 1-gamma-A OS=     | 0.022456   | 1.6487  | 0.57188 | D11 - V11; D11 - V21            |
| CL10303Contig1             | CL10303Contig1                      | 0.016985   | 1.7699  | 0.57188 | D11 - V11; D11 - V21            |
| CL2807Contig6              | CL2807Contig6                       | 0.036802   | 1.4341  | 0.57188 | D11 - V11                       |
| P13549                     | Elongation factor 1-alpha, somatic  | 0.040627   | 1.3912  | 0.57188 | V21 - D11; V21 - V11            |
| CL52Contig8                | CL52Contig8                         | 0.016186   | 1.7909  | 0.57188 | D11 - V11                       |
| Q91375                     | Elongation factor 1-gamma-B OS=     | 0.034498   | 1.4622  | 0.57188 | D11 - V11                       |
| CL1Contig516               | CL1Contig516                        | 0.006713   | 2.1731  | 0.57188 | D11 - V11; D11 - V21            |
| DC017479 homologue to Ur   | Rep: MGC84307 protein - Xenopus     | 0.039108   | 1.4077  | 0.57188 | V21 - V11                       |
| zeinaSSns_comp370410_c     | len=541                             | 0.038704   | 1.4122  | 0.57188 | V21 - V11                       |
| CL3941Contig2              | CL3941Contig2                       | 0.01608    | 1.7937  | 0.57188 | D11 - V11; D11 - V21            |
| CL100Contig17              | CL100Contig17                       | 0.0093764  | 2.028   | 0.57188 | D11 - V11; D11 - V21            |
| CL8453Contig2              | CL8453Contig2                       | 0.041195   | 1.3852  | 0.57188 | D11 - V11                       |
| CL5360Contig3              | CL5360Contig3                       | 0.042495   | 1.3717  | 0.57188 | D11 - V11; V21 - V11            |
| P06180                     | Histone-binding protein N1/N2 OS=   | 0.026772   | 1.5723  | 0.57188 | D11 - V11                       |
| CL1948Contig4              | CL1948Contig4                       | 0.011635   | 1.9342  | 0.57188 | D11 - V11; V21 - V11            |
| CL1948Contig1              | CL1948Contig1                       | 0.01523    | 1.8173  | 0.57188 | D11 - V11; V21 - V11            |
| Q08AW0                     | LOC100036826 protein (Fragment      | 0.045863   | 1.3385  | 0.57188 | V21 - V11                       |
| P02412                     | 60S ribosomal protein L18-B OS=)    | 0.039454   | 1.4039  | 0.57188 | D11 - V11                       |
| DC017935 homologue to Ur   | Rep: MGC52825 protein - Xenopus     | 0.038889   | 1.4102  | 0.57188 | D11 - V11                       |
| CL100Contig5               | CL100Contig5                        | 0.043003   | 1.3665  | 0.57188 | D11 - V11                       |
| TC460578 homologue to Un   | Rep: MGC52578 protein - Xenopus     | 0.038841   | 1.4107  | 0.57188 | D11 - V11                       |
| TC436798 UniRef100_Q7Z     | Rep: MGC52578 protein - Xenopus     | 0.038838   | 1.4107  | 0.57188 | D11 - V11                       |
| TC440824 similar to UniRef | Rep: MGC52825 protein - Xenopus     | 0.038838   | 1.4107  | 0.57188 | D11 - V11                       |
| Q7ZXX5                     | MGC52578 protein OS=Xenopus lae     | 0.038838   | 1.4107  | 0.57188 | D11 - V11                       |
| Q91764                     | HMG-X protein OS=Xenopus laevi      | 0.038838   | 1.4107  | 0.57188 | D11 - V11                       |
| zeinaSSns_comp387005_c     | len=2084                            | 0.040414   | 1.3935  | 0.57188 | D11 - V11                       |
| TC434817 UniRef100_Q7Z     | Rep: MGC52578 protein - Xenopus     | 0.038854   | 1.4106  | 0.57188 | D11 - V11                       |

**Table S5.** Proteins with significantly different relative abundances between D11, V11, and V21 blastomeres ( $p < 0.05$ ,  $\geq 1.3$  fold change).

**D11/V11**

| Accession                  | Description                                                                               | log2(ratio)  | -log10(p)   |
|----------------------------|-------------------------------------------------------------------------------------------|--------------|-------------|
| Q6GN79                     | Ribosomal protein L37 OS=Xenopus laevis GN=rpl37 PE=3 SV=1 -                              | 1.658337106  | 1.925172322 |
| Q6INB6;CL4908Contig1;Q4V7V | ATP synthase subunit gamma OS=Xenopus laevis GN=atp5c1 PE=2 SV=1 - [Q6INB6;CL4908Contig1] | 1.23344343   | 2.364520178 |
| Q6AZL9                     | MGC86316 protein OS=Xenopus laevis GN=rps23 PE=2 SV=1 - [Q6AZL9]                          | 1.162988013  | 2.026819619 |
| A9JS40                     | LOC100127299 protein OS=Xenopus laevis GN=ubxn10 PE=2 SV=1 - [A9JS40]                     | 1.011728168  | 2.085135768 |
| Q3KPT4;dsrrswapns          | MGC131338 protein OS=Xenopus laevis GN=zmat3 PE=2 SV=1 - [Q3KPT4]                         | 0.961719714  | 1.572864324 |
| Q66KW1;CL1655Contig1       | MGC85384 protein OS=Xenopus laevis GN=rpl29 PE=4 SV=1 - [Q66KW1]                          | 0.950436286  | 1.909581109 |
| P62155;CL1Contig149        | Calmodulin OS=Xenopus laevis GN=calm1 PE=1 SV=2 - [CALM_XEN]                              | 0.890452367  | 1.870904775 |
| DC024875 homologue         | Rep: Actin, alpha cardiac muscle 1 - Xenopus laevis (African clawed frog)                 | 0.734805466  | 1.307257941 |
| P15107;CL10172Contig1      | Superoxide dismutase [Cu-Zn] B OS=Xenopus laevis GN=sod1-b F                              | 0.684532475  | 2.150460564 |
| Q7SZA5;BJ091434 U          | MGC64312 protein OS=Xenopus laevis GN=rpl29 PE=4 SV=1 - [Q7SZA5]                          | 0.640270329  | 3.173574517 |
| TC457286 similar to U      | Rep: Vitellogenin-A2 precursor (VTG A2) [Contains: Lipovitellin I; Lipovitellin II]       | 0.640040657  | 2.439410693 |
| Q6DJL4;CL12647Contig1      | MGC82059 protein OS=Xenopus laevis GN=atpif1 PE=4 SV=1 - [Q6DJL4]                         | 0.6258535    | 2.665281005 |
| Q6NUH0;CL2830Contig1       | 60S ribosomal protein L31 OS=Xenopus laevis GN=rpl31 PE=2 SV=1 - [Q6NUH0]                 | 0.460309036  | 1.415905742 |
| Q8AVH2;TC421129 U          | <i>Ckb-prov protein OS=Xenopus laevis GN=ckb PE=2 SV=1 - [Q8AVH2]</i>                     | 0.393238936  | 1.422252163 |
| Q6EE53                     | 40S ribosomal protein S8 (Fragment) OS=Xenopus laevis PE=2 SV=1 - [Q6EE53]                | -0.395728246 | 2.880852257 |
|                            |                                                                                           | -0.730405712 | 3.417207872 |

**D11/V21**

| Accession             | Description                                                                                 | log2(ratio)  | -log10(p)   |
|-----------------------|---------------------------------------------------------------------------------------------|--------------|-------------|
| Q6GN79                | Ribosomal protein L37 OS=Xenopus laevis GN=rpl37 PE=3 SV=1 -                                | 1.640492892  | 1.933823271 |
| Q7ZYF7;CL1612Contig1  | MGC53103 protein OS=Xenopus laevis GN=phb PE=2 SV=1 - [Q7ZYF7]                              | 1.352212731  | 2.47394585  |
| Q7T0N8;CL7665Contig1  | Hadhsc-prov protein OS=Xenopus laevis GN=hadh PE=2 SV=1 - [Q7T0N8]                          | 1.223438266  | 1.984507542 |
| Q66KW1;CL1655Contig1  | MGC85384 protein OS=Xenopus laevis GN=rpl29 PE=4 SV=1 - [Q66KW1]                            | 1.176249409  | 2.186106542 |
| CL1144Contig2         | CL1144Contig2                                                                               | 1.142555326  | 2.20197089  |
| Q6GMA6;dsrrswapns     | MGC81949 protein OS=Xenopus laevis GN=cct6a PE=2 SV=1 - [Q6GMA6]                            | 0.968664633  | 1.662325234 |
| Q5XGW1;CL14714Contig1 | LOC495263 protein OS=Xenopus laevis GN=atp5g1 PE=2 SV=1 - [Q5XGW1]                          | 0.901444609  | 3.564714963 |
| Q6AZL9                | MGC86316 protein OS=Xenopus laevis GN=rps23 PE=2 SV=1 - [Q6AZL9]                            | 0.893529102  | 2.193882985 |
| Q52KY1;CL6681Contig1  | Vdac2 protein OS=Xenopus laevis GN=vdac2 PE=2 SV=1 - [Q52KY1]                               | 0.874962421  | 2.173484675 |
| Q640C8;CL4522Contig1  | LOC494703 protein OS=Xenopus laevis GN=LOC494703 PE=2 SV=1 - [Q640C8]                       | 0.855134137  | 1.728396128 |
| Q6INB6;CL4908Contig1  | ATP synthase subunit gamma OS=Xenopus laevis GN=atp5c1 PE=2 SV=1 - [Q6INB6]                 | 0.788950505  | 2.871483847 |
| Q6NUH0;CL2830Contig1  | 60S ribosomal protein L31 OS=Xenopus laevis GN=rpl31 PE=2 SV=1 - [Q6NUH0]                   | 0.784531669  | 1.564348832 |
| Q7ZXG3;CL107Contig1   | Iff-2-prov protein OS=Xenopus laevis GN=eif5a PE=2 SV=1 - [Q7ZXG3]                          | 0.749264488  | 1.608216153 |
| Q6GQB2                | MGC80199 protein OS=Xenopus laevis GN=rpl7a PE=2 SV=1 - [Q6GQB2]                            | 0.72958205   | 2.0941971   |
| P49393;CL1Contig72    | 40S ribosomal protein S13 OS=Xenopus laevis GN=rps13 PE=3 SV=1 - [P49393]                   | 0.716364168  | 1.428648891 |
| Q7SZ77;CL50Contig6    | Rps11 protein OS=Xenopus laevis GN=rps11 PE=2 SV=1 - [Q7SZ77]                               | 0.696988492  | 1.711527853 |
| Q6PA58                | Succinate dehydrogenase [ubiquinone] flavoprotein subunit A, mitochondrial                  | 0.684971693  | 1.439882782 |
| dsrrswapns_comp212    | len=1347                                                                                    | 0.672229062  | 2.589035747 |
| Q6NTP7;CL640Contig1   | LOC398139 protein OS=Xenopus laevis GN=LOC398139 PE=2 SV=1 - [Q6NTP7]                       | 0.66045059   | 1.945338719 |
| Q801S3                | 40S ribosomal protein S3a-A OS=Xenopus laevis GN=rps3a-a PE=2 SV=1 - [Q801S3]               | 0.657106015  | 2.436934689 |
| DC024875 homologue    | Rep: Actin, alpha cardiac muscle 1 - Xenopus laevis (African clawed frog)                   | 0.634176664  | 2.453248216 |
| Q7SYU3;CL2410Contig1  | MGC64490 protein OS=Xenopus laevis GN=rps5 PE=2 SV=1 - [Q7SYU3]                             | 0.620531526  | 1.608749062 |
| TC460552 homologue    | Rep: Heat shock 10kDa protein 1 - Xenopus tropicalis (Western clawed frog)                  | 0.580412599  | 2.905504785 |
| Q8AVW0;CL561Contig1   | Rpl12-prov protein OS=Xenopus laevis GN=rpl12 PE=2 SV=1 - [Q8AVW0]                          | 0.539173679  | 1.336085716 |
| Q7ZTL5;CL1515Contig1  | Cct8-prov protein OS=Xenopus laevis GN=cct8 PE=2 SV=1 - [Q7ZTL5]                            | 0.513852595  | 2.336182452 |
| zeinaSSns_comp3872    | len=1781                                                                                    | 0.508828857  | 1.665097096 |
| P70010                | Nucleoside diphosphate kinase A1 OS=Xenopus laevis PE=2 SV=1 - [P70010]                     | 0.501548345  | 1.822761083 |
| Q7SZA5;BJ091434 U     | MGC64312 protein OS=Xenopus laevis GN=rpl29 PE=4 SV=1 - [Q7SZA5]                            | 0.480709857  | 2.447766669 |
| Q6DJL4;CL12647Contig1 | MGC82059 protein OS=Xenopus laevis GN=atpif1 PE=4 SV=1 - [Q6DJL4]                           | 0.46816835   | 3.577388918 |
| Q6GP18;CL116Contig1   | Superoxide dismutase OS=Xenopus laevis GN=MGC80739 PE=2 SV=1 - [Q6GP18]                     | 0.464674032  | 1.421199691 |
| P39017;CL2323Contig1  | 40S ribosomal protein S6 OS=Xenopus laevis GN=rps6 PE=2 SV=1 - [P39017]                     | 0.45664967   | 1.379663104 |
| CL3418Contig2         | CL3418Contig2                                                                               | 0.435198217  | 1.676167357 |
| P02350                | 40S ribosomal protein S3-A OS=Xenopus laevis GN=rps3-a PE=2 SV=1 - [P02350]                 | 0.385315345  | 1.343267061 |
| Q6PAY8;CL13107Contig1 | Hydroxysteroid dehydrogenase-like protein 2 OS=Xenopus laevis GN=h2hdh PE=2 SV=1 - [Q6PAY8] | 0.384385566  | 2.364674981 |
| TC463468              | vitellogenin (A1) [Xenopus laevis]                                                          | -0.479986157 | 6.779548898 |
| TC462321 similar to U | Rep: Vitellogenin-A2 precursor (VTG A2) [Contains: Lipovitellin I; Lipovitellin II]         | -0.578666293 | 6.321155139 |
| P20310                | Neural cadherin-1 OS=Xenopus laevis PE=2 SV=1 - [CADHN_XEN]                                 | -0.580404744 | 4.606091488 |
| P20342                | 40S ribosomal protein S15 OS=Xenopus laevis GN=rps15 PE=2 SV=1 - [P20342]                   | -0.587575765 | 3.136999411 |



|                       |                                                                       |              |             |
|-----------------------|-----------------------------------------------------------------------|--------------|-------------|
| BG513260 homologue    | Rep: Vitellogenin B1 - Xenopus laevis (African clawed frog), partial  | -0.61092132  | 13.57483682 |
| TC464539 similar to U | Rep: Vitellogenin B1 - Xenopus laevis (African clawed frog), partial  | -0.645974459 | 8.971804995 |
| CL25067Contig1        | CL25067Contig1                                                        | -0.679233661 | 7.864660053 |
| TC457286 similar to U | Rep: Vitellogenin-A2 precursor (VTG A2) [Contains: Lipovitellin I; Li | -0.702073388 | 11.3438544  |
| Q7SZF6                | Vitellogenin B1 OS=Xenopus laevis GN=vtgb1 PE=2 SV=1 - [Q7SZ          | -0.721822417 | 17.99764532 |
| A0PCF2                | T-box transcription factor Xtbx6r OS=Xenopus laevis GN=Xtbx6r PE      | -0.731187925 | 12.06087234 |
| TC462743 homologue    | Rep: Vitellogenin B1 - Xenopus laevis (African clawed frog), partial  | -0.763933661 | 14.90971422 |
| TC469090 homologue    | Rep: Vitellogenin-A2 precursor (VTG A2) [Contains: Lipovitellin I; Li | -0.901169608 | 14.4385647  |
| Q6E2P0                | Urocortin 3 OS=Xenopus laevis GN=ucn3 PE=2 SV=1 - [Q6E2P0_            | -1.231564861 | 10.10326666 |

## V11/V21

| Accession             | Description                                                           | log2(ratio)  | -log10(p)   |
|-----------------------|-----------------------------------------------------------------------|--------------|-------------|
| P50886                | 60S ribosomal protein L22 OS=Xenopus laevis GN=rpl22 PE=2 SV          | 1.106282852  | 7.166139723 |
| Q5XGW1;CL14714Co      | LOC495263 protein OS=Xenopus laevis GN=atp5g1 PE=2 SV=1 -             | 0.956286403  | 5.140405847 |
| Q6PA58                | Succinate dehydrogenase [ubiquinone] flavoprotein subunit A, mito     | 0.886675807  | 12.90792031 |
| Q6GQB2                | MGC80199 protein OS=Xenopus laevis GN=rpl7a PE=2 SV=1 - [Q6           | 0.707105549  | 4.979389681 |
| dsrrswapns_comp212    | len=1347                                                              | 0.681093481  | 4.389430469 |
| Q4V871                | MGC114621 protein OS=Xenopus laevis GN=MGC114621 PE=4 S               | 0.665639917  | 5.142113083 |
| Q6NTP7;CL640Contig    | LOC398139 protein OS=Xenopus laevis GN=LOC398139 PE=2 SV              | 0.626734619  | 4.046150439 |
| zeinaSSns_comp3872    | len=1781                                                              | 0.579775042  | 6.284321009 |
| Q8AVH2;TC421129 U     | Ckb-prov protein OS=Xenopus laevis GN=ckb PE=2 SV=1 - [Q8AV           | 0.565570737  | 3.025112671 |
| Q801S3                | 40S ribosomal protein S3a-A OS=Xenopus laevis GN=rps3a-a PE=          | 0.56440772   | 5.174805521 |
| Q6PI76;CL289Contig7   | Rps14-prov protein OS=Xenopus laevis GN=rps14 PE=2 SV=1 - [C          | 0.541107791  | 2.567161099 |
| Q7SZS3;CL137Contig    | Aspartate aminotransferase OS=Xenopus laevis GN=got2 PE=2 SV          | 0.534400411  | 2.209633298 |
| Q6GNH1                | MGC82808 protein OS=Xenopus laevis GN=rpl23 PE=2 SV=1 - [Q6           | 0.528354153  | 2.63119155  |
| Q640C8;CL4522Conti    | LOC494703 protein OS=Xenopus laevis GN=LOC494703 PE=2 SV              | 0.503408999  | 1.556967688 |
| Q7ZTL5;CL1515Conti    | Cct8-prov protein OS=Xenopus laevis GN=cct8 PE=2 SV=1 - [Q7Z          | 0.492556548  | 3.063183857 |
| Q7SZ77;CL50Contig6    | Rps11 protein OS=Xenopus laevis GN=rps11 PE=2 SV=1 - [Q7SZ7           | 0.469618279  | 2.648602252 |
| CL3418Contig2         | CL3418Contig2                                                         | 0.462183946  | 5.557285557 |
| P39017;CL2323Contig   | 40S ribosomal protein S6 OS=Xenopus laevis GN=rps6 PE=2 SV=           | 0.452880642  | 2.959055012 |
| Q66KV6;CL1Contig27    | LOC100101273 protein OS=Xenopus laevis GN=rpl28 PE=2 SV=1             | 0.449575732  | 3.222250313 |
| CL1144Contig2         | CL1144Contig2                                                         | 0.400583227  | 1.838671666 |
| Q6GR58;CL4491Cont     | Malate dehydrogenase OS=Xenopus laevis GN=mdh2 PE=2 SV=1              | 0.400294977  | 3.804695075 |
| CL1127Contig1         | CL1127Contig1                                                         | 0.389143733  | 5.45379494  |
| Q6B4U5;CL4491Cont     | Malate dehydrogenase OS=Xenopus laevis GN=mdh2 PE=2 SV=1              | 0.387545105  | 2.546863135 |
| Q6AZL9                | MGC86316 protein OS=Xenopus laevis GN=rps23 PE=2 SV=1 - [Q            | -0.405011526 | 2.443926138 |
| Q7SZA5;BJ091434 U     | MGC64312 protein OS=Xenopus laevis GN=rpl29 PE=4 SV=1 - [Q            | -0.448082054 | 1.447852842 |
| Q00387;CL13623Con     | Serine protease inhibitor A6 OS=Xenopus laevis GN=serpina6 PE=        | -0.478433382 | 3.304595825 |
| Q6INX6                | MGC80065 protein OS=Xenopus laevis GN=rps16 PE=3 SV=1 - [Q            | -0.485176981 | 1.926534613 |
| P20310                | Neural cadherin-1 OS=Xenopus laevis PE=2 SV=1 - [CADHN_XEN            | -0.49047186  | 1.507131649 |
| Q6IP81;CL11159Cont    | MGC78867 protein OS=Xenopus laevis GN=lta4h PE=2 SV=1 - [Q6           | -0.500714351 | 2.975196871 |
| TC463468              | vitellogenin (A1) [Xenopus laevis]                                    | -0.514729007 | 3.670437598 |
| BG513260 homologue    | Rep: Vitellogenin B1 - Xenopus laevis (African clawed frog), partial  | -0.616500961 | 3.189485855 |
| P17508;CL430Contig    | Elongation factor 1-alpha, oocyte form OS=Xenopus laevis PE=1 S       | -0.627455233 | 1.459249993 |
| CL25067Contig1        | CL25067Contig1                                                        | -0.635577423 | 1.681761571 |
| Q7T0N8;CL7665Cont     | Hadhsc-prov protein OS=Xenopus laevis GN=hadh PE=2 SV=1 - [C          | -0.648205563 | 1.325194607 |
| CL2344Contig1         | CL2344Contig1                                                         | -0.649203361 | 3.56427685  |
| Q07254                | 40S ribosomal protein S10 OS=Xenopus laevis GN=rps10 PE=1 SV          | -0.681686199 | 2.229020205 |
| A0PCF2                | T-box transcription factor Xtbx6r OS=Xenopus laevis GN=Xtbx6r PE      | -0.698812355 | 4.26010971  |
| TC462743 homologue    | Rep: Vitellogenin B1 - Xenopus laevis (African clawed frog), partial  | -0.729553193 | 4.694683576 |
| Q7SZF6                | Vitellogenin B1 OS=Xenopus laevis GN=vtgb1 PE=2 SV=1 - [Q7SZ          | -0.768259066 | 7.397499709 |
| TC462321 similar to U | Rep: Vitellogenin-A2 precursor (VTG A2) [Contains: Lipovitellin I; Li | -0.849359798 | 6.33285892  |
| TC464539 similar to U | Rep: Vitellogenin B1 - Xenopus laevis (African clawed frog), partial  | -0.877021755 | 5.535647861 |
| TC469090 homologue    | Rep: Vitellogenin-A2 precursor (VTG A2) [Contains: Lipovitellin I; Li | -0.952093563 | 8.892737219 |
| Q3KPT4;dsrrswapns     | MGC131338 protein OS=Xenopus laevis GN=zmat3 PE=2 SV=1 - [            | -1.030106269 | 3.436291338 |
| TC457286 similar to U | Rep: Vitellogenin-A2 precursor (VTG A2) [Contains: Lipovitellin I; Li | -1.380747312 | 3.926863535 |
| Q6E2P0                | Urocortin 3 OS=Xenopus laevis GN=ucn3 PE=2 SV=1 - [Q6E2P0_            | -1.444655882 | 8.812761804 |

**Table S6.** Comparison of proteins identified by the single-cell mass spectrometer with transcripts that have been independently identified. A total of 998 proteins match published transcript datasets, which expands to at least 1,601 protein-transcript matches based on protein names that have been derived from mRNA-based datasets.

| Accession Number for Identified Protein | Protein Description                                                                      | Gene Name    | Protein expected based on mRNA db? (Yes) | Quantified in This Work? (Yes) | Transcript Reported in Ref. 29? | Transcript Reported in Ref. 28b? | Transcript Reported in 28a? | Protein Matching Transcript ID? (TRUE) | Protein Likely Matching Transcript ID? (TRUE) |
|-----------------------------------------|------------------------------------------------------------------------------------------|--------------|------------------------------------------|--------------------------------|---------------------------------|----------------------------------|-----------------------------|----------------------------------------|-----------------------------------------------|
| 237402600                               | Xenopus laevis clone CH219-6E24, complete sequence                                       |              |                                          |                                |                                 |                                  |                             |                                        |                                               |
| 27228087                                | Xenopus laevis clone S10-45-G5 mRNA sequence                                             |              |                                          |                                |                                 |                                  |                             |                                        |                                               |
| 28386279                                | Xenopus laevis, Similar to propionyl                                                     | pccb         |                                          |                                | Y                               |                                  |                             | TRUE                                   | TRUE                                          |
| 428676593;K9YHL9                        | Xenopus laevis myelodysplasia syn                                                        | etv6         |                                          |                                | Y                               |                                  |                             | TRUE                                   | TRUE                                          |
| 7769000                                 | Xenopus laevis clone OLT 2-1 retro                                                       | olt2         |                                          |                                |                                 |                                  |                             |                                        |                                               |
| A0A090AX62                              | Zygotic Mcm3 protein OS=Xenopus                                                          | mcm3         |                                          |                                | Y                               | Y                                |                             | TRUE                                   | TRUE                                          |
| A0AUS4;CL3713Contig3                    | LOC398314 protein OS=Xenopus la                                                          | dlat         |                                          |                                | Y                               |                                  |                             | TRUE                                   | TRUE                                          |
| A0AUT1                                  | Trichoplein keratin filament-binding                                                     | tchp         |                                          |                                | Y                               |                                  |                             | TRUE                                   | TRUE                                          |
| A0AUT2;CL2720Contig3                    | Ubiquitin carboxyl-terminal hydrolas                                                     | usp5         |                                          |                                |                                 |                                  |                             |                                        |                                               |
| A0AUT4                                  | LOC100036778 protein OS=Xenopus laevis GN=LOC100036778 PE=2 SV=1 - [A0AUT4_XENLA]        |              |                                          |                                |                                 |                                  |                             |                                        |                                               |
| A0AUJ3                                  | Cox7a2b protein OS=Xenopus laevi                                                         | cox7a2       |                                          |                                | Y                               |                                  |                             | TRUE                                   | TRUE                                          |
| A0AUJ3;CL12025Contig1                   | Cox7a2b protein OS=Xenopus laevi                                                         | cox7a2       |                                          |                                | Y                               |                                  |                             | TRUE                                   | TRUE                                          |
| A0AUU6                                  | Wbp2 protein OS=Xenopus laevis G                                                         | wbp2         |                                          |                                |                                 |                                  |                             |                                        |                                               |
| A0JMT7                                  | LOC431931 protein OS=Xenopus la                                                          | LOC431931    |                                          |                                |                                 |                                  |                             |                                        |                                               |
| A0JMU7                                  | Zswim4_predicted protein OS=Xend                                                         | zswim4       |                                          |                                | Y                               |                                  |                             | TRUE                                   | TRUE                                          |
| A0JMU8                                  | Protein CASC3 OS=Xenopus laevis                                                          | casc3        |                                          |                                | Y                               |                                  |                             | TRUE                                   | TRUE                                          |
| A0JMW0;CL8946Contig1                    | MGC154839 protein OS=Xenopus l                                                           | tmem117      |                                          |                                | Y                               |                                  |                             | TRUE                                   | TRUE                                          |
| A0JMW2                                  | MGC154857 protein OS=Xenopus l                                                           | heatr2       |                                          |                                | Y                               |                                  |                             | TRUE                                   | TRUE                                          |
| A0JMY5;CL6629Contig1                    | NF-X1-type zinc finger protein NFXI                                                      | nfx1         |                                          |                                | Y                               | Y                                |                             | TRUE                                   | TRUE                                          |
| A0JMZ0                                  | Zfp276 protein OS=Xenopus laevis                                                         | znf276       |                                          |                                | Y                               |                                  |                             | TRUE                                   | TRUE                                          |
| A0JMZ1;CL1Contig964                     | Nucleolar and spindle-associated pr                                                      | nusap1       |                                          |                                | Y                               |                                  |                             | TRUE                                   | TRUE                                          |
| A0JPG5                                  | LOC100036792 protein (Fragment)                                                          | LOC100036792 |                                          |                                |                                 |                                  |                             |                                        |                                               |
| A0JPH8;CL13915Contig1                   | LOC100036800 protein OS=Xenopus                                                          | LOC100036800 |                                          |                                |                                 |                                  |                             |                                        |                                               |
| A0PCF2                                  | T-box transcription factor Xtbx6r OS                                                     | tbx6r        |                                          | Y                              |                                 |                                  |                             | TRUE                                   | TRUE                                          |
| A0T1H8                                  | Catalase OS=Xenopus laevis PE=2                                                          | cat          |                                          |                                |                                 |                                  |                             |                                        |                                               |
| A1A613                                  | LOC733342 protein (Fragment) OS=                                                         | LOC733342    |                                          |                                |                                 |                                  |                             |                                        |                                               |
| A1A638;CL11731Contig1                   | Dbib protein OS=Xenopus laevis G                                                         | dbi          |                                          |                                | Y                               |                                  |                             | TRUE                                   | TRUE                                          |
| A1L106;CL10855Contig1                   | Lgtn protein OS=Xenopus laevis G                                                         | eif2d        |                                          |                                | Y                               |                                  |                             | TRUE                                   | TRUE                                          |
| A1L1G6;CL1072Contig1                    | LOC100036836 protein OS=Xenopus                                                          | kiaa0182     |                                          |                                | Y                               |                                  |                             | TRUE                                   | TRUE                                          |
| A1L1H0                                  | LOC100036839 protein OS=Xenopus                                                          | rere         |                                          |                                | Y                               |                                  |                             | TRUE                                   | TRUE                                          |
| A1L1H6                                  | LOC100036845 protein OS=Xenopus                                                          | LOC100036845 |                                          |                                |                                 |                                  |                             |                                        |                                               |
| A1L1H7                                  | LOC733281 protein OS=Xenopus la                                                          | supt5h       |                                          |                                | Y                               |                                  |                             | TRUE                                   | TRUE                                          |
| A1L2G7                                  | Uncharacterized protein OS=Xenopus laevis PE=2 SV=1 - [A1L2G7_XENLA]                     |              |                                          |                                |                                 |                                  |                             |                                        |                                               |
| A1L2H9                                  | LOC100036853 protein OS=Xenopus                                                          | LOC100036853 |                                          |                                |                                 |                                  |                             |                                        |                                               |
| A1L2I5;CL5868Contig1                    | Histone H2A OS=Xenopus laevis G                                                          | h2afy        |                                          |                                | Y                               |                                  |                             | TRUE                                   | TRUE                                          |
| A1L2I8                                  | LOC100036860 protein OS=Xenopus                                                          | LOC100036860 |                                          |                                |                                 |                                  |                             |                                        |                                               |
| A1L2I9                                  | Transmembrane protein 214-B OS=                                                          | tmem214-b    |                                          |                                | Y                               |                                  |                             | TRUE                                   | TRUE                                          |
| A1L2J4                                  | Putative uncharacterized protein (Fragment) OS=Xenopus laevis PE=2 SV=1 - [A1L2J4_XENLA] |              |                                          |                                |                                 |                                  |                             |                                        |                                               |
| A1L2N5;CL26379Contig1                   | LOC100036902 protein OS=Xenopus                                                          | a1l2n5       |                                          |                                |                                 |                                  |                             |                                        |                                               |
| A1L2Q6                                  | Glutathione S-transferase OS=Xend                                                        | gsta1        |                                          |                                | Y                               |                                  |                             | TRUE                                   | TRUE                                          |
| A1L2R8;CL2492Contig1                    | LOC100036931 protein OS=Xenopus                                                          | sds          |                                          |                                | Y                               |                                  |                             | TRUE                                   | TRUE                                          |
| A1L2R9                                  | Putative uncharacterized protein OS=Xenopus laevis PE=2 SV=1 - [A1L2R9_XENLA]            |              |                                          |                                |                                 |                                  |                             |                                        |                                               |
| A1L2S7                                  | LOC100036938 protein OS=Xenopus                                                          | LOC100036938 |                                          |                                |                                 |                                  |                             |                                        |                                               |
| A1L2U3                                  | LOC100036954 protein OS=Xenopus                                                          | LOC100036954 |                                          |                                |                                 |                                  |                             |                                        |                                               |
| A1L2U5                                  | LOC100036956 protein (Fragment)                                                          | LOC100036956 |                                          |                                |                                 |                                  |                             |                                        |                                               |
| A1L3F5                                  | C-Maf-inducing protein OS=Xenopus                                                        | cmip         |                                          |                                | Y                               |                                  |                             | TRUE                                   | TRUE                                          |
| A1L3F7                                  | LOC100036993 protein (Fragment)                                                          | LOC100036993 |                                          |                                |                                 |                                  |                             |                                        |                                               |
| A1L3H5                                  | LOC100037009 protein (Fragment)                                                          | LOC100037009 |                                          |                                |                                 |                                  |                             |                                        |                                               |
| A1L3J7                                  | LOC100037025 protein OS=Xenopus                                                          | ganab        |                                          |                                | Y                               |                                  |                             | TRUE                                   | TRUE                                          |
| A1L3K2;CL19654Contig1                   | Pyruvate kinase OS=Xenopus laevi                                                         | pklr         |                                          |                                | Y                               |                                  |                             | TRUE                                   | TRUE                                          |
| A1L3K7                                  | Enolase A OS=Xenopus laevis GN=                                                          | enoa         |                                          |                                |                                 |                                  |                             |                                        |                                               |
| A2BD52                                  | LOC100158263 protein (Fragment)                                                          | LOC100158263 |                                          |                                |                                 |                                  |                             |                                        |                                               |
| A2BD73                                  | LOC100037109 protein (Fragment)                                                          | LOC100037109 |                                          |                                |                                 |                                  |                             |                                        |                                               |
| A2BDA0;CL1Contig853                     | Histone H4 OS=Xenopus laevis GN                                                          | hist1h4d     |                                          |                                |                                 |                                  |                             |                                        |                                               |
| A2BDB0                                  | Actin, cytoplasmic 2 OS=Xenopus l                                                        | actg1        |                                          | Y                              |                                 |                                  |                             | TRUE                                   | TRUE                                          |
| A2RV71                                  | LOC100037140 protein OS=Xenopus                                                          | LOC100037140 |                                          |                                |                                 |                                  |                             |                                        |                                               |
| A2RV96                                  | LOC496076 protein OS=Xenopus la                                                          | irrc34       |                                          |                                |                                 | Y                                |                             | TRUE                                   | TRUE                                          |
| A2RV99                                  | LOC445855 protein (Fragment) OS=                                                         | LOC445855    |                                          |                                |                                 |                                  |                             |                                        |                                               |
| A2RVB7                                  | LOC100037164 protein OS=Xenopus                                                          | cdc42ep4     |                                          |                                | Y                               |                                  |                             | TRUE                                   | TRUE                                          |
| A2VCV3;CL11727Contig1                   | LOC100037128 protein OS=Xenopus                                                          | LOC100037128 |                                          |                                |                                 |                                  |                             |                                        |                                               |
| A2VD74                                  | LOC100037179 protein OS=Xenopus                                                          | mep1a        |                                          |                                | Y                               |                                  |                             | TRUE                                   | TRUE                                          |
| A2VD83                                  | Mannose-1-phosphate guanyltransf                                                         | gmppb        |                                          |                                | Y                               |                                  |                             | TRUE                                   | TRUE                                          |
| A2VD87                                  | LOC100037189 protein OS=Xenopus                                                          | cyp3a4       |                                          |                                | Y                               |                                  |                             | TRUE                                   | TRUE                                          |
| A2VD97                                  | LOC100037195 protein OS=Xenopus                                                          | mccc2        |                                          |                                | Y                               |                                  |                             | TRUE                                   | TRUE                                          |
| A2VDA1                                  | LOC100037198 protein OS=Xenopus                                                          | tnni1        |                                          |                                |                                 |                                  |                             |                                        |                                               |
| A2VDA2;CL2004Contig2                    | LOC100037199 protein OS=Xenopus                                                          | sri          |                                          |                                |                                 |                                  |                             |                                        |                                               |
| A2VDA5                                  | Putative uncharacterized protein OS=Xenopus laevis PE=2 SV=1 - [A2VDA5_XENLA]            |              |                                          |                                |                                 |                                  |                             |                                        |                                               |
| A2VDC7                                  | Ribonuclease kappa-A OS=Xenopus                                                          | rnasek       |                                          |                                | Y                               |                                  |                             | TRUE                                   | TRUE                                          |
| A2VDD0                                  | LOC100037222 protein (Fragment)                                                          | LOC100037222 |                                          |                                |                                 |                                  |                             |                                        |                                               |
| A2VDD2                                  | Tctex1 domain-containing protein 1-                                                      | tctex1d1     |                                          |                                | Y                               |                                  |                             | TRUE                                   | TRUE                                          |
| A2VDD8                                  | Phosphorylase (Fragment) OS=Xen                                                          | LOC100037229 |                                          |                                |                                 |                                  |                             |                                        |                                               |
| A3KMH8                                  | LOC398050 protein OS=Xenopus la                                                          | LOC398050    |                                          |                                |                                 |                                  |                             |                                        |                                               |

|                                  |                                                                                              |              |  |   |  |   |   |  |      |      |
|----------------------------------|----------------------------------------------------------------------------------------------|--------------|--|---|--|---|---|--|------|------|
| A3KMT2                           | Death-associated protein-like 1-A O                                                          | dapl1        |  |   |  | Y |   |  | TRUE | TRUE |
| A3KMU5;CL12285Contig1            | Death-associated protein-like 1-B O                                                          | dapl1        |  |   |  | Y |   |  | TRUE | TRUE |
| A3KNB7                           | LOC495502 protein OS=Xenopus laevis                                                          | LOC495502    |  |   |  |   |   |  |      |      |
| A3KNC9                           | LOC100049107 protein OS=Xenopus laevis                                                       | zfp161       |  |   |  | Y |   |  | TRUE | TRUE |
| A3KNF4                           | LOC100049121 protein OS=Xenopus laevis GN=LOC100049121 PE=4 SV=1 - [A3KNF4_XENLA]            |              |  |   |  |   |   |  |      |      |
| A4FVE9                           | LOC100049132 protein (Fragment)                                                              | LOC100049132 |  |   |  |   |   |  |      |      |
| A4FVF5                           | LOC100049136 protein OS=Xenopus laevis GN=LOC100049136 PE=4 SV=1 - [A4FVF5_XENLA]            |              |  |   |  |   |   |  |      |      |
| A4IFX0                           | LOC100049139 protein OS=Xenopus laevis                                                       | LOC100049139 |  |   |  |   |   |  |      |      |
| A4IFX5                           | LOC100049142 protein (Fragment)                                                              | LOC100049142 |  |   |  |   |   |  |      |      |
| A4PB26                           | Protein CDV3 homolog B OS=Xenopus laevis                                                     | cdv3         |  |   |  | Y |   |  | TRUE | TRUE |
| A4QNS5                           | Uncharacterized protein (Fragment) OS=Xenopus laevis PE=2 SV=1 - [A4QNS5_XENLA]              |              |  |   |  |   |   |  |      |      |
| A4QNS6                           | LOC100049151 protein OS=Xenopus laevis                                                       | zc3h11a      |  |   |  |   |   |  |      |      |
| A4UXD6                           | Toll-like receptor8 (Fragment) OS=Xenopus laevis                                             | tlr8         |  |   |  |   |   |  |      |      |
| A5D8L8                           | LOC100049741 protein (Fragment)                                                              | LOC100049741 |  |   |  |   |   |  |      |      |
| A5D8M0                           | Tyrosyl-DNA phosphodiesterase 2 C                                                            | tdp2         |  |   |  | Y |   |  | TRUE | TRUE |
| A5D8M8                           | LOC100049751 protein OS=Xenopus laevis                                                       | nqo1         |  |   |  | Y |   |  | TRUE | TRUE |
| A5D8P9                           | LOC100049770 protein (Fragment) OS=Xenopus laevis GN=LOC100049770 PE=2 SV=1 - [A5D8P9_XENLA] |              |  |   |  |   |   |  |      |      |
| A5PKN2                           | LOC100101285 protein (Fragment)                                                              | LOC100101285 |  |   |  |   |   |  |      |      |
| A5PKN6;CL3181Contig1             | LOC100101289 protein OS=Xenopus laevis                                                       | fam13a       |  |   |  | Y |   |  | TRUE | TRUE |
| A5PKR6                           | LOC100101313 protein OS=Xenopus laevis                                                       | crym         |  |   |  |   |   |  |      |      |
| A5XAW2                           | Kinesin heavy chain (Fragment) OS=Xenopus laevis                                             | khc          |  |   |  |   |   |  |      |      |
| A6QL57                           | LOC100125670 protein (Fragment)                                                              | LOC100125670 |  |   |  |   |   |  |      |      |
| A6YHD9                           | RAG1 (Fragment) OS=Xenopus laevis                                                            | rag1         |  |   |  |   |   |  |      |      |
| A7E223                           | LOC100125672 protein OS=Xenopus laevis                                                       | LOC100125672 |  |   |  |   |   |  |      |      |
| A7J1T2                           | Mitogen-activated protein kinase kinase 1                                                    | map3k13      |  |   |  | Y |   |  | TRUE | TRUE |
| A7UC11                           | MRF4a OS=Xenopus laevis GN=MRF4a                                                             | mrf4a        |  |   |  |   |   |  |      |      |
| A7YYL7;CL10641Contig1            | LOC100126616 protein OS=Xenopus laevis                                                       | mrlp32       |  |   |  | Y |   |  | TRUE | TRUE |
| A8CWK9                           | Low density lipoprotein-related protein 1                                                    | lrp2         |  |   |  | Y |   |  | TRUE | TRUE |
| A8E0R9                           | Glutamate receptor-interacting protein 1                                                     | grip2        |  |   |  | Y | Y |  | TRUE | TRUE |
| A8E5Y6;CL7871Contig1             | LOC100126622 protein OS=Xenopus laevis                                                       | ninj1        |  |   |  |   |   |  |      |      |
| A8WH44                           | LOC100127250 protein OS=Xenopus laevis                                                       | LOC100127250 |  |   |  |   |   |  |      |      |
| A9JS15                           | LOC100127283 protein OS=Xenopus laevis                                                       | fam110d      |  |   |  |   |   |  |      |      |
| A9JS28                           | LOC100127294 protein OS=Xenopus laevis                                                       | slc7a9       |  |   |  | Y |   |  | TRUE | TRUE |
| A9JS40                           | LOC100127299 protein OS=Xenopus laevis                                                       | ubxn10       |  | Y |  | Y |   |  | TRUE | TRUE |
| A9JS44                           | LOC100127303 protein (Fragment)                                                              | LOC100127303 |  |   |  |   |   |  |      |      |
| A9JS79                           | Proteasome subunit beta type (Fragment) OS=Xenopus laevis                                    | psmb         |  |   |  |   |   |  |      |      |
| A9JS81                           | LOC100127334 protein OS=Xenopus laevis                                                       | LOC100127334 |  |   |  |   |   |  |      |      |
| A9JS85                           | LOC100127336 protein OS=Xenopus laevis                                                       | b3galt1      |  |   |  |   |   |  |      |      |
| A9JSS1                           | LOC100127274 protein OS=Xenopus laevis                                                       | rnf2         |  |   |  |   |   |  |      |      |
| A9QW72                           | N-methyl-D-aspartate receptor subunit 1                                                      | grin2a       |  |   |  |   |   |  |      |      |
| A9ULW5;CL11158Contig1            | LOC100137631 protein OS=Xenopus laevis                                                       | acot13       |  |   |  | Y |   |  | TRUE | TRUE |
| A9ULW6                           | ZPD protein OS=Xenopus laevis GN=ZPD                                                         | zpd          |  |   |  | Y |   |  | TRUE | TRUE |
| A9ULX0                           | LOC100137635 protein OS=Xenopus laevis                                                       | LOC100137635 |  |   |  |   |   |  |      |      |
| A9UM04                           | LOC100137663 protein (Fragment)                                                              | LOC100137663 |  |   |  |   |   |  |      |      |
| A9UM19;CL14087Contig1            | LOC100137677 protein OS=Xenopus laevis GN=LOC100137677 PE=2 SV=1 - [A9UM19_XENLA]            |              |  |   |  |   |   |  |      |      |
| A9UM22                           | LOC100137679 protein (Fragment)                                                              | LOC100137679 |  |   |  |   |   |  |      |      |
| A9UM24                           | Bix1 protein OS=Xenopus laevis GN=Bix1                                                       | Bix1         |  |   |  | Y |   |  | TRUE | TRUE |
| A9UMM8                           | LOC100137686 protein OS=Xenopus laevis                                                       | khyn1        |  |   |  | Y |   |  | TRUE | TRUE |
| A9UMQ1                           | LOC100137703 protein (Fragment)                                                              | LOC100137703 |  |   |  |   |   |  |      |      |
| A9ZS93                           | Transmembrane, prostate androgen receptor                                                    | pmepa1       |  |   |  | Y |   |  | TRUE | TRUE |
| AW765098 UniRef100_Q2            | Rep: LOC733431 protein - Xenopus laevis (African clawed frog), partial (34%)                 |              |  |   |  |   |   |  |      |      |
| AW783929 similar to UniRef100_Q2 | Rep: Asx1-prov protein - Xenopus laevis                                                      | asx1         |  |   |  | Y |   |  | TRUE | TRUE |
| B0LM40                           | Importin beta 1 OS=Xenopus laevis                                                            | kpnb1        |  |   |  | Y |   |  | TRUE | TRUE |
| B1B546;CL15536Contig1            | Transcription factor foxp3 OS=Xenopus laevis                                                 | foxp3        |  |   |  |   |   |  |      |      |
| B1H1N7                           | Ancient ubiquitous protein 1 OS=Xenopus laevis                                               | aup1         |  |   |  | Y |   |  | TRUE | TRUE |
| B1H1N8;CL525Contig5              | LOC100036826 protein OS=Xenopus laevis GN=LOC100036826 PE=2 SV=1 - [B1H1N8_XENLA]            |              |  |   |  |   |   |  |      |      |
| B1H1V0                           | LOC495286 protein (Fragment) OS=Xenopus laevis                                               | LOC495286    |  |   |  |   |   |  |      |      |
| B1H1X2                           | LOC100158324 protein (Fragment)                                                              | LOC100158324 |  |   |  |   |   |  |      |      |
| B1H1X4                           | Serrate RNA effector molecule homolog                                                        | srrt         |  |   |  |   |   |  |      |      |
| B1NA54                           | Ig-like receptor 2.1 OS=Xenopus laevis                                                       | xlr2         |  |   |  |   |   |  |      |      |
| B1NA55                           | FcR-like protein (Fragment) OS=Xenopus laevis                                                | xfi1.7       |  |   |  |   |   |  |      |      |
| B1WBA3                           | Putative uncharacterized protein (Fragment) OS=Xenopus laevis PE=2 SV=1 - [B1WBA3_XENLA]     |              |  |   |  |   |   |  |      |      |
| B1WBB8;CL4228Contig1             | LOC100158420 protein OS=Xenopus laevis                                                       | LOC100158420 |  |   |  |   |   |  |      |      |
| B1WBD3                           | LOC100158432 protein OS=Xenopus laevis                                                       | aars         |  |   |  | Y | Y |  | TRUE | TRUE |
| B1WBD8                           | NO145 protein OS=Xenopus laevis                                                              | no145        |  |   |  |   |   |  |      |      |
| B1WBE0                           | LOC100158438 protein OS=Xenopus laevis                                                       | eprs         |  |   |  |   |   |  |      |      |
| B2DCQ5;CL597Contig2              | Cdc25B phosphatase OS=Xenopus laevis                                                         | cdc25b       |  |   |  | Y |   |  | TRUE | TRUE |
| B2GTY1                           | LOC100158450 protein (Fragment)                                                              | LOC100158450 |  |   |  |   |   |  |      |      |
| B3DLM0                           | LOC100174803 protein OS=Xenopus laevis                                                       | acs14        |  |   |  | Y |   |  | TRUE | TRUE |
| B3IXB3                           | RAS guanyl releasing protein 2 OS=Xenopus laevis                                             | rasgrp2      |  |   |  |   |   |  |      |      |
| B5DE44                           | Putative uncharacterized protein OS=Xenopus laevis                                           | dpp8         |  |   |  | Y |   |  | TRUE | TRUE |
| B5LEQ4                           | RNA binding protein Bruno-like 3b C                                                          | celf2        |  |   |  |   |   |  |      |      |
| B5MFE9                           | Olfactomedin-like protein 3 OS=Xenopus laevis                                                | olfml3       |  |   |  |   |   |  |      |      |
| B5SVV6                           | Anoctamin OS=Xenopus laevis GN=Anoctamin                                                     | ano1         |  |   |  | Y |   |  | TRUE | TRUE |
| B7ZPZ8;CL315Contig4              | Thymosin beta 4 peptide OS=Xenopus laevis                                                    | tmsb4x       |  |   |  | Y |   |  | TRUE | TRUE |
| B7ZQA9                           | POU domain, class 5, transcription factor 1                                                  | pou5f1.2     |  |   |  |   |   |  |      |      |
| B7ZQB3                           | LOC398954 protein OS=Xenopus laevis                                                          | LOC398954    |  |   |  |   |   |  |      |      |
| B7ZQE3                           | Tbx6 protein OS=Xenopus laevis GN=Tbx6                                                       | tbx6         |  |   |  |   |   |  |      |      |
| B7ZQH2                           | XMam1 protein OS=Xenopus laevis                                                              | mam1         |  |   |  |   |   |  |      |      |
| B7ZQN6;CL688Contig4              | Ctn protein OS=Xenopus laevis GN=Ctn                                                         | Ctn          |  |   |  |   |   |  |      |      |
| B7ZQQ8                           | CL-2 protein OS=Xenopus laevis GN=CL-2                                                       | cl2          |  |   |  |   |   |  |      |      |
| B7ZQU5;CL4806Contig1             | Protein Wnt OS=Xenopus laevis GN=Wnt                                                         | wnt10a       |  |   |  |   |   |  |      |      |
| B7ZQU6                           | LOC398035 protein OS=Xenopus laevis GN=LOC398035 PE=2 SV=1 - [B7ZQU6_XENLA]                  |              |  |   |  |   |   |  |      |      |
| B7ZQU9;213625150                 | Putative uncharacterized protein OS=Xenopus laevis PE=2 SV=1 - [B7ZQU9_XENLA]                |              |  |   |  |   |   |  |      |      |
| B7ZQV9                           | Frizzled-8 OS=Xenopus laevis GN=Frizzled-8                                                   | xfz8         |  |   |  |   |   |  |      |      |
| B7ZR28                           | N1/N2 protein OS=Xenopus laevis GN=N1/N2                                                     | n1/n2        |  |   |  |   |   |  |      |      |

|                            |                                                                                                                   |            |  |  |   |  |   |      |      |
|----------------------------|-------------------------------------------------------------------------------------------------------------------|------------|--|--|---|--|---|------|------|
| B7ZR30                     | Serine/threonine-protein kinase 10-                                                                               | stk10      |  |  | Y |  |   | TRUE | TRUE |
| B7ZR33                     | GATA binding factor-1 OS=Xenopus                                                                                  | gata1a-A   |  |  |   |  |   |      |      |
| B7ZR39                     | Integrin alphaV subunit OS=Xenopus                                                                                | itgav      |  |  | Y |  |   | TRUE | TRUE |
| B7ZR65                     | Transcription factor Sox-9-A OS=Xe                                                                                | sox9       |  |  | Y |  |   | TRUE | TRUE |
| B7ZR89                     | Paraxis-like protein OS=Xenopus la                                                                                | tcf15      |  |  |   |  |   |      |      |
| B7ZRE7                     | Breast and ovarian cancer suscepti                                                                                | brac1      |  |  | Y |  |   | TRUE | TRUE |
| B7ZRI3                     | Ret proto-oncogene OS=Xenopus la                                                                                  | ret        |  |  |   |  |   |      |      |
| B7ZRI9                     | Nitric oxide synthase OS=Xenopus                                                                                  | nos1       |  |  | Y |  |   | TRUE | TRUE |
| B7ZRL0                     | Fragile X mental retardation 1 OS=)                                                                               | fmr1-A     |  |  |   |  |   |      |      |
| B7ZRM8                     | MDS1 and EVI1 complex locus prot                                                                                  | mecom      |  |  | Y |  |   | TRUE | TRUE |
| B7ZRN2                     | Putative uncharacterized protein OS=Xenopus laevis PE=2 SV=1 - [B7ZRN2_XENLA]                                     |            |  |  |   |  |   |      |      |
| B7ZRN9                     | Integrin alpha5 subunit OS=Xenopus                                                                                | itga5      |  |  | Y |  |   | TRUE | TRUE |
| B7ZRQ0                     | Uncharacterized protein OS=Xenopus                                                                                | C100127269 |  |  |   |  |   |      |      |
| B7ZRR5                     | Xebf-3 protein OS=Xenopus laevis                                                                                  | ebf3       |  |  | Y |  |   | TRUE | TRUE |
| B7ZRR7                     | GATA binding factor-1b OS=Xenopus                                                                                 | gata1ba    |  |  |   |  |   |      |      |
| B7ZRS3                     | Forkhead box transcription factor O                                                                               | foxp2a     |  |  |   |  |   |      |      |
| B7ZRS8;CL9Contig15         | Meis1 protein OS=Xenopus laevis C                                                                                 | meis1      |  |  | Y |  |   | TRUE | TRUE |
| B7ZRZ7                     | T-box transcription factor Tbx5 OS=                                                                               | tbx5       |  |  |   |  |   |      |      |
| B7ZS08                     | Ago61 protein OS=Xenopus laevis                                                                                   | ago61      |  |  |   |  |   |      |      |
| B7ZS26                     | V-rel reticuloendotheliosis viral onc                                                                             | relba      |  |  |   |  |   |      |      |
| B7ZS37                     | Bromodomain adjacent to zinc finger                                                                               | baz2a      |  |  | Y |  |   | TRUE | TRUE |
| B7ZS71                     | Putative uncharacterized protein OS=Xenopus laevis PE=2 SV=1 - [B7ZS71_XENLA]                                     |            |  |  |   |  |   |      |      |
| B7ZS80;CL2280Contig1       | Tyrosine-protein kinase receptor OS                                                                               | tyr        |  |  |   |  |   |      |      |
| B7ZSA6;CL4246Contig2       | Inversin OS=Xenopus laevis GN=in                                                                                  | invs       |  |  | Y |  |   | TRUE | TRUE |
| B7ZSB1                     | Putative uncharacterized protein OS=Xenopus laevis PE=2 SV=1 - [B7ZSB1_XENLA]                                     |            |  |  |   |  |   |      |      |
| B7ZSB2                     | Pcm-1 protein OS=Xenopus laevis                                                                                   | pcm1       |  |  |   |  |   |      |      |
| B7ZSC6;CL817Contig2        | Slit2-a protein OS=Xenopus laevis                                                                                 | slit2      |  |  | Y |  |   | TRUE | TRUE |
| B7ZSI6                     | LOC100126641 protein OS=Xenopus laevis GN=LOC100126641 PE=2 SV=1 - [B7ZSI6_XENLA]                                 |            |  |  |   |  |   |      |      |
| B7ZSK0                     | Structural maintenance of chromosom                                                                               | smc2       |  |  | Y |  |   | TRUE | TRUE |
| B9V5F5                     | Centrosomal protein of 63 kDa-A OS                                                                                | cep63      |  |  | Y |  | Y | TRUE | TRUE |
| B9V8Q8                     | Ionotropic glutamate receptor subur                                                                               | glur5      |  |  |   |  |   |      |      |
| B9V8R7                     | Ionotropic glutamate receptor subur                                                                               | gria1      |  |  |   |  |   |      |      |
| B9V8R9                     | Ionotropic glutamate receptor subur                                                                               | gria3      |  |  |   |  |   |      |      |
| BF048119 similar to UniRe  | Rep: Histone H3.3 - Homo sapiens                                                                                  | hist33     |  |  |   |  |   |      |      |
| BF427462 weakly similar to | Rep: Cytochrome c oxidase subunit                                                                                 | cox1       |  |  |   |  |   |      |      |
| BF611644 similar to UniRe  | Rep: Cytochrome c oxidase subunit                                                                                 | cox1       |  |  |   |  |   |      |      |
| BF614900 similar to UniRe  | Rep: Cold-inducible RNA-binding pr                                                                                | cirbp      |  |  | Y |  |   | TRUE | TRUE |
| BG017237 similar to UniRe  | Rep: 60S ribosomal protein L6 - Xer                                                                               | rpl6       |  |  |   |  |   |      |      |
| BG020450 homologue to U    | Rep: Ubiquitin protein ligase E3C -                                                                               | ube3c      |  |  | Y |  |   | TRUE | TRUE |
| BG023428 similar to UniRe  | Rep: Zgc:153686 - Danio rerio (Zebrafish) (Brachydanio rerio), partial (11%)                                      |            |  |  |   |  |   |      |      |
| BG037251 similar to UniRe  | Rep: Tubulin beta chain - Homo sap                                                                                | tubb       |  |  | Y |  | Y | TRUE | TRUE |
| BG160380 weakly similar to | Rep: Tubulin beta-4 chain - Xenopus                                                                               | tubb4      |  |  | Y |  |   | TRUE | TRUE |
| BG234522 similar to UniRe  | Rep: MGC80199 protein - Xenopus laevis (African clawed frog), partial (76%)                                       |            |  |  |   |  |   |      |      |
| BG235002 similar to UniRe  | Rep: Keratin, type I cytoskeletal 47 kDa - Xenopus laevis (African clawed frog), partial (15%)                    |            |  |  |   |  |   |      |      |
| BG513260 homologue to U    | Rep: Vitellin B1 - Xenopus laevis                                                                                 | vtgb1      |  |  | Y |  |   | TRUE | TRUE |
| BI314067                   | BI314067                                                                                                          |            |  |  |   |  |   |      |      |
| BI349541 homologue to Ur   | Rep: SIPA1L1 protein - Xenopus lae                                                                                | sipa1l1    |  |  | Y |  |   | TRUE | TRUE |
| BJ029212 UniRef100_Q7Z     | Rep: Cell division protein kinase 9-E                                                                             | cdk9       |  |  | Y |  |   | TRUE | TRUE |
| BJ031467 similar to UniRe  | Rep: LOC495262 protein - Xenopus laevis (African clawed frog), partial (4%)                                       |            |  |  |   |  |   |      |      |
| BJ035035 UniRef100_Q6C     | Rep: MGC80437 protein - Xenopus laevis (African clawed frog), partial (47%)                                       |            |  |  |   |  |   |      |      |
| BJ039283                   | BJ039283                                                                                                          |            |  |  |   |  |   |      |      |
| BJ042270 UniRef100_Q6F     | Rep: Ubiquitin carrier protein - Xenopus tropicalis (Western clawed frog) (Silurana tropicalis), partial (84%)    |            |  |  |   |  |   |      |      |
| BJ042996 weakly similar to | Rep: Zgc:162320 protein - Danio rerio (Zebrafish) (Brachydanio rerio), partial (7%)                               |            |  |  |   |  |   |      |      |
| BJ047835 homologue to U    | Rep: Receptor-associated protein of                                                                               | rapn       |  |  |   |  |   |      |      |
| BJ049851 homologue to U    | Rep: MGC85497 protein - Xenopus laevis (African clawed frog), partial (41%)                                       |            |  |  |   |  |   |      |      |
| BJ072460                   | BJ072460                                                                                                          |            |  |  |   |  |   |      |      |
| BJ086436 homologue to U    | Rep: 40S ribosomal protein S7 - Xe                                                                                | rps7       |  |  | Y |  |   | TRUE | TRUE |
| BJ093020 weakly similar to | Rep: Transposase - Rana lessonae (Pool frog), partial (34%)                                                       |            |  |  |   |  |   |      |      |
| BJ09767 UniRef100_P33      | Rep: Blastomere cadherin precursor - Xenopus laevis (African clawed frog), partial (7%)                           |            |  |  |   |  |   |      |      |
| BJ623194 homologue to U    | Rep: G3bp-prov protein - Xenopus l                                                                                | g3bp       |  |  | Y |  |   | TRUE | TRUE |
| BJ627598 similar to UniRe  | Rep: Novel trypsin family protein - Xenopus tropicalis (Western clawed frog) (Silurana tropicalis), partial (16%) |            |  |  |   |  |   |      |      |
| BJ630382 homologue to U    | Rep: S6 ribosomal protein - Pagrus                                                                                | rps6       |  |  |   |  |   |      |      |
| BJ639435                   | BJ639435                                                                                                          |            |  |  |   |  |   |      |      |
| BM192676 UniRef100_Q6I     | Rep: LOC414678 protein - Xenopus laevis (African clawed frog), partial (68%)                                      |            |  |  |   |  |   |      |      |
| BP68589 homologue to U     | Rep: LOC398570 protein - Xenopus laevis (African clawed frog), partial (14%)                                      |            |  |  |   |  |   |      |      |
| BP731916 homologue to U    | Rep: Pre-B-cell leukemia transcripti                                                                              | pbx3       |  |  |   |  |   |      |      |
| BQ400069 similar to UniRe  | Rep: Tyrosine-protein kinase recept                                                                               | tie1       |  |  |   |  | Y | TRUE | TRUE |
| BQ736408 UniRef100_UPI     | Rep: Multidrug resistance-associate                                                                               | mrp7       |  |  |   |  |   |      |      |
| BU910031 UniRef100_Q7Z     | Rep: Hnrpa0-prov protein - Xenopus                                                                                | hnrpa0     |  |  |   |  |   |      |      |
| C0J6M5                     | MEF2A alpha 12b isoform OS=Xen                                                                                    | mef2a      |  |  | Y |  |   | TRUE | TRUE |
| C5H606                     | Vitronectin OS=Xenopus laevis GN=                                                                                 | vtn        |  |  |   |  |   |      |      |
| C5MK13                     | Calcium channel voltage-dependent                                                                                 | cacna1a    |  |  | Y |  |   | TRUE | TRUE |
| CA789974 similar to UniRe  | Rep: LOC100036684 protein - Xenopus tropicalis (Western clawed frog) (Silurana tropicalis), partial (4%)          |            |  |  |   |  |   |      |      |
| CA974276 similar to UniRe  | Rep: Zgc:110113 - Danio rerio (Zebrafish) (Brachydanio rerio), partial (33%)                                      |            |  |  |   |  |   |      |      |
| CA981790 weakly similar to | Rep: Gastrula zinc finger protein XICGF49.1 - Xenopus laevis (African clawed frog), partial (39%)                 |            |  |  |   |  |   |      |      |
| CB200344 homologue to U    | Rep: Thyroglobulin precursor - Xenopus tropicalis, partial (97%)                                                  |            |  |  |   |  |   |      |      |
| CB562068 weakly similar to | Rep: Proto-oncogene tyrosine-prote                                                                                | ros        |  |  |   |  |   |      |      |
| CB941391 homologue to U    | Rep: Plakophilin-1 (Band-6 protein)                                                                               | pkp1       |  |  | Y |  |   | TRUE | TRUE |
| CB943254 homologue to U    | Rep: LOC733227 protein - Xenopus laevis (African clawed frog), partial (52%)                                      |            |  |  |   |  |   |      |      |
| CD099718 homologue to U    | Rep: Ubiquitin carboxyl-terminal hyd                                                                              | uchl1      |  |  | Y |  |   | TRUE | TRUE |
| CD362591 weakly similar to | Rep: Ephrin type-B receptor 5 precu                                                                               | ephb2      |  |  |   |  |   |      |      |
| CD362892 homologue to U    | Rep: CD74 molecule, major histoco                                                                                 | hg2a       |  |  |   |  |   |      |      |
| CF270399                   | CF270399                                                                                                          |            |  |  |   |  |   |      |      |
| CF270562 homologue to U    | Rep: MGC138012 protein - Bos tau                                                                                  | MGC138012  |  |  |   |  |   |      |      |
| CF270676 UniRef100_Q6E     | Rep: Cndp2-prov protein - Xenopus                                                                                 | cndp2      |  |  | Y |  |   | TRUE | TRUE |
| CF270773 similar to UniRe  | Rep: Predicted protein - Nematostella vectensis (Starlet sea anemone), partial (7%)                               |            |  |  |   |  |   |      |      |

|                           |                                                                                    |        |   |  |   |   |  |  |      |      |
|---------------------------|------------------------------------------------------------------------------------|--------|---|--|---|---|--|--|------|------|
| CF283899 homologue to U   | Rep: MGC81934 protein - <i>Xenopus laevis</i> (African clawed frog), partial (26%) |        |   |  |   |   |  |  |      |      |
| CF285683 homologue to U   | Rep: Arcn1 protein - <i>Xenopus laevis</i>                                         | arcn1  |   |  |   | Y |  |  | TRUE | TRUE |
| CF521141 similar to UniRe | Rep: Metalloreductase STEAP3 (EC                                                   | steap3 |   |  |   | Y |  |  | TRUE | TRUE |
| CL1004Contig2             | CL1004Contig2                                                                      |        | Y |  |   |   |  |  |      | TRUE |
| CL1008Contig1;Q6PAD3      | CL1008Contig1                                                                      | psmc4  | Y |  |   | Y |  |  | TRUE | TRUE |
| CL10114Contig2            | CL10114Contig2                                                                     |        | Y |  |   |   |  |  |      | TRUE |
| CL10115Contig1            | CL10115Contig1                                                                     |        | Y |  |   |   |  |  |      | TRUE |
| CL1011Contig3             | CL1011Contig3                                                                      |        | Y |  | Y |   |  |  | TRUE | TRUE |
| CL1014Contig3             | CL1014Contig3                                                                      |        | Y |  |   |   |  |  |      | TRUE |
| CL1016Contig5             | CL1016Contig5                                                                      |        | Y |  |   |   |  |  |      | TRUE |
| CL10183Contig1            | CL10183Contig1                                                                     |        | Y |  |   |   |  |  |      | TRUE |
| CL1028Contig5             | CL1028Contig5                                                                      |        | Y |  |   |   |  |  |      | TRUE |
| CL10344Contig2            | CL10344Contig2                                                                     |        | Y |  |   |   |  |  |      | TRUE |
| CL10383Contig2            | CL10383Contig2                                                                     |        | Y |  |   |   |  |  |      | TRUE |
| CL1039Contig2             | CL1039Contig2                                                                      |        | Y |  |   |   |  |  |      | TRUE |
| CL1050Contig4             | CL1050Contig4                                                                      |        | Y |  |   |   |  |  |      | TRUE |
| CL10567Contig1            | CL10567Contig1                                                                     |        | Y |  |   |   |  |  |      | TRUE |
| CL10588Contig1            | CL10588Contig1                                                                     |        | Y |  |   |   |  |  |      | TRUE |
| CL10642Contig1            | CL10642Contig1                                                                     |        | Y |  |   |   |  |  |      | TRUE |
| CL1072Contig4             | CL1072Contig4                                                                      |        | Y |  |   |   |  |  |      | TRUE |
| CL1073Contig2             | CL1073Contig2                                                                      |        | Y |  |   |   |  |  |      | TRUE |
| CL1078Contig2             | CL1078Contig2                                                                      |        | Y |  |   |   |  |  |      | TRUE |
| CL1079Contig2             | CL1079Contig2                                                                      |        | Y |  |   |   |  |  |      | TRUE |
| CL10840Contig1            | CL10840Contig1                                                                     |        | Y |  |   |   |  |  |      | TRUE |
| CL10967Contig1            | CL10967Contig1                                                                     |        | Y |  |   |   |  |  |      | TRUE |
| CL1096Contig1             | CL1096Contig1                                                                      |        | Y |  |   |   |  |  |      | TRUE |
| CL10981Contig1            | CL10981Contig1                                                                     |        | Y |  |   |   |  |  |      | TRUE |
| CL1100Contig1;Q6GN22      | CL1100Contig1                                                                      |        | Y |  |   |   |  |  |      | TRUE |
| CL11026Contig1            | CL11026Contig1                                                                     |        | Y |  |   |   |  |  |      | TRUE |
| CL11069Contig2            | CL11069Contig2                                                                     |        | Y |  |   |   |  |  |      | TRUE |
| CL1108Contig2             | CL1108Contig2                                                                      |        | Y |  |   |   |  |  |      | TRUE |
| CL1127Contig1             | CL1127Contig1                                                                      |        | Y |  | Y |   |  |  | TRUE | TRUE |
| CL1127Contig2             | CL1127Contig2                                                                      |        | Y |  |   |   |  |  |      | TRUE |
| CL11289Contig1            | CL11289Contig1                                                                     |        | Y |  |   |   |  |  |      | TRUE |
| CL112Contig13             | CL112Contig13                                                                      |        | Y |  |   |   |  |  |      | TRUE |
| CL11346Contig1            | CL11346Contig1                                                                     |        | Y |  |   |   |  |  |      | TRUE |
| CL11402Contig2            | CL11402Contig2                                                                     |        | Y |  |   |   |  |  |      | TRUE |
| CL11416Contig1            | CL11416Contig1                                                                     |        | Y |  |   |   |  |  |      | TRUE |
| CL1142Contig1             | CL1142Contig1                                                                      |        | Y |  |   |   |  |  |      | TRUE |
| CL1144Contig2             | CL1144Contig2                                                                      |        | Y |  | Y |   |  |  | TRUE | TRUE |
| CL1144Contig4             | CL1144Contig4                                                                      |        | Y |  |   |   |  |  |      | TRUE |
| CL11454Contig2            | CL11454Contig2                                                                     |        | Y |  |   |   |  |  |      | TRUE |
| CL11493Contig1            | CL11493Contig1                                                                     |        | Y |  |   |   |  |  |      | TRUE |
| CL114Contig15             | CL114Contig15                                                                      |        | Y |  |   |   |  |  |      | TRUE |
| CL11511Contig1            | CL11511Contig1                                                                     |        | Y |  |   |   |  |  |      | TRUE |
| CL1151Contig6             | CL1151Contig6                                                                      |        | Y |  |   |   |  |  |      | TRUE |
| CL1152Contig1             | CL1152Contig1                                                                      |        | Y |  | Y |   |  |  | TRUE | TRUE |
| CL11612Contig1            | CL11612Contig1                                                                     |        | Y |  |   |   |  |  |      | TRUE |
| CL1161Contig2             | CL1161Contig2                                                                      |        | Y |  |   |   |  |  |      | TRUE |
| CL11663Contig1            | CL11663Contig1                                                                     |        | Y |  |   |   |  |  |      | TRUE |
| CL11742Contig1            | CL11742Contig1                                                                     |        | Y |  |   |   |  |  |      | TRUE |
| CL1175Contig2             | CL1175Contig2                                                                      |        | Y |  |   |   |  |  |      | TRUE |
| CL1177Contig1             | CL1177Contig1                                                                      |        | Y |  |   |   |  |  |      | TRUE |
| CL11786Contig1            | CL11786Contig1                                                                     |        | Y |  |   |   |  |  |      | TRUE |
| CL11800Contig1            | CL11800Contig1                                                                     |        | Y |  |   |   |  |  |      | TRUE |
| CL11836Contig1            | CL11836Contig1                                                                     |        | Y |  |   |   |  |  |      | TRUE |
| CL11854Contig1            | CL11854Contig1                                                                     |        | Y |  |   |   |  |  |      | TRUE |
| CL11897Contig1            | CL11897Contig1                                                                     |        | Y |  |   |   |  |  |      | TRUE |
| CL11908Contig1            | CL11908Contig1                                                                     |        | Y |  |   |   |  |  |      | TRUE |
| CL11975Contig1            | CL11975Contig1                                                                     |        | Y |  |   |   |  |  |      | TRUE |
| CL119Contig4              | CL119Contig4                                                                       |        | Y |  |   |   |  |  |      | TRUE |
| CL11Contig15              | CL11Contig15                                                                       |        | Y |  |   |   |  |  |      | TRUE |
| CL11Contig16              | CL11Contig16                                                                       |        | Y |  |   |   |  |  |      | TRUE |
| CL1207Contig5             | CL1207Contig5                                                                      |        | Y |  |   |   |  |  |      | TRUE |
| CL12084Contig1            | CL12084Contig1                                                                     |        | Y |  |   |   |  |  |      | TRUE |
| CL120Contig6              | CL120Contig6                                                                       |        | Y |  |   |   |  |  |      | TRUE |
| CL12250Contig1            | CL12250Contig1                                                                     |        | Y |  |   |   |  |  |      | TRUE |
| CL12264Contig1            | CL12264Contig1                                                                     |        | Y |  |   |   |  |  |      | TRUE |
| CL122Contig3              | CL122Contig3                                                                       |        | Y |  |   |   |  |  |      | TRUE |
| CL12483Contig1            | CL12483Contig1                                                                     |        | Y |  |   |   |  |  |      | TRUE |
| CL12542Contig1            | CL12542Contig1                                                                     |        | Y |  |   |   |  |  |      | TRUE |
| CL12604Contig1            | CL12604Contig1                                                                     |        | Y |  |   |   |  |  |      | TRUE |
| CL12609Contig1            | CL12609Contig1                                                                     |        | Y |  |   |   |  |  |      | TRUE |
| CL1261Contig4             | CL1261Contig4                                                                      |        | Y |  |   |   |  |  |      | TRUE |
| CL1263Contig5             | CL1263Contig5                                                                      |        | Y |  |   |   |  |  |      | TRUE |
| CL12657Contig1            | CL12657Contig1                                                                     |        | Y |  |   |   |  |  |      | TRUE |
| CL127Contig15             | CL127Contig15                                                                      |        | Y |  |   |   |  |  |      | TRUE |
| CL12884Contig1            | CL12884Contig1                                                                     |        | Y |  |   |   |  |  |      | TRUE |
| CL128Contig8              | CL128Contig8                                                                       |        | Y |  |   |   |  |  |      | TRUE |
| CL12908Contig1            | CL12908Contig1                                                                     |        | Y |  |   |   |  |  |      | TRUE |
| CL12913Contig1            | CL12913Contig1                                                                     |        | Y |  |   |   |  |  |      | TRUE |
| CL1292Contig5             | CL1292Contig5                                                                      |        | Y |  |   |   |  |  |      | TRUE |
| CL12947Contig1            | CL12947Contig1                                                                     |        | Y |  |   |   |  |  |      | TRUE |
| CL12958Contig1            | CL12958Contig1                                                                     |        | Y |  |   |   |  |  |      | TRUE |
| CL12Contig33              | CL12Contig33                                                                       |        | Y |  |   |   |  |  |      | TRUE |
| CL13058Contig1            | CL13058Contig1                                                                     |        | Y |  |   |   |  |  |      | TRUE |

|                |                |  |   |   |  |  |      |      |
|----------------|----------------|--|---|---|--|--|------|------|
| CL13093Contig1 | CL13093Contig1 |  | Y |   |  |  |      | TRUE |
| CL13100Contig1 | CL13100Contig1 |  | Y |   |  |  |      | TRUE |
| CL13120Contig1 | CL13120Contig1 |  | Y |   |  |  |      | TRUE |
| CL13132Contig1 | CL13132Contig1 |  | Y |   |  |  |      | TRUE |
| CL1326Contig1  | CL1326Contig1  |  | Y |   |  |  |      | TRUE |
| CL13314Contig1 | CL13314Contig1 |  | Y |   |  |  |      | TRUE |
| CL1338Contig2  | CL1338Contig2  |  | Y |   |  |  |      | TRUE |
| CL13399Contig1 | CL13399Contig1 |  | Y |   |  |  |      | TRUE |
| CL1339Contig3  | CL1339Contig3  |  | Y |   |  |  |      | TRUE |
| CL13408Contig1 | CL13408Contig1 |  | Y |   |  |  |      | TRUE |
| CL13435Contig1 | CL13435Contig1 |  | Y |   |  |  |      | TRUE |
| CL13504Contig1 | CL13504Contig1 |  | Y |   |  |  |      | TRUE |
| CL13513Contig1 | CL13513Contig1 |  | Y |   |  |  |      | TRUE |
| CL13526Contig1 | CL13526Contig1 |  | Y |   |  |  |      | TRUE |
| CL13527Contig1 | CL13527Contig1 |  | Y |   |  |  |      | TRUE |
| CL13558Contig1 | CL13558Contig1 |  | Y |   |  |  |      | TRUE |
| CL13593Contig1 | CL13593Contig1 |  | Y |   |  |  |      | TRUE |
| CL13645Contig1 | CL13645Contig1 |  | Y |   |  |  |      | TRUE |
| CL1377Contig4  | CL1377Contig4  |  | Y |   |  |  |      | TRUE |
| CL137Contig3   | CL137Contig3   |  | Y |   |  |  |      | TRUE |
| CL1380Contig2  | CL1380Contig2  |  | Y |   |  |  |      | TRUE |
| CL13815Contig1 | CL13815Contig1 |  | Y |   |  |  |      | TRUE |
| CL13963Contig1 | CL13963Contig1 |  | Y |   |  |  |      | TRUE |
| CL1396Contig2  | CL1396Contig2  |  | Y |   |  |  |      | TRUE |
| CL13990Contig1 | CL13990Contig1 |  | Y |   |  |  |      | TRUE |
| CL1401Contig6  | CL1401Contig6  |  | Y |   |  |  |      | TRUE |
| CL1402Contig2  | CL1402Contig2  |  | Y |   |  |  |      | TRUE |
| CL14060Contig1 | CL14060Contig1 |  | Y |   |  |  |      | TRUE |
| CL14169Contig1 | CL14169Contig1 |  | Y |   |  |  |      | TRUE |
| CL1416Contig2  | CL1416Contig2  |  | Y |   |  |  |      | TRUE |
| CL1416Contig4  | CL1416Contig4  |  | Y |   |  |  |      | TRUE |
| CL14192Contig1 | CL14192Contig1 |  | Y |   |  |  |      | TRUE |
| CL1424Contig5  | CL1424Contig5  |  | Y |   |  |  |      | TRUE |
| CL14445Contig1 | CL14445Contig1 |  | Y |   |  |  |      | TRUE |
| CL14502Contig1 | CL14502Contig1 |  | Y |   |  |  |      | TRUE |
| CL14546Contig1 | CL14546Contig1 |  | Y |   |  |  |      | TRUE |
| CL1459Contig2  | CL1459Contig2  |  | Y |   |  |  |      | TRUE |
| CL14603Contig1 | CL14603Contig1 |  | Y |   |  |  |      | TRUE |
| CL14648Contig1 | CL14648Contig1 |  | Y |   |  |  |      | TRUE |
| CL1478Contig2  | CL1478Contig2  |  | Y |   |  |  |      | TRUE |
| CL14851Contig1 | CL14851Contig1 |  | Y |   |  |  |      | TRUE |
| CL148Contig11  | CL148Contig11  |  | Y | Y |  |  | TRUE | TRUE |
| CL1497Contig7  | CL1497Contig7  |  | Y |   |  |  |      | TRUE |
| CL14985Contig1 | CL14985Contig1 |  | Y |   |  |  |      | TRUE |
| CL1501Contig1  | CL1501Contig1  |  | Y |   |  |  |      | TRUE |
| CL15037Contig1 | CL15037Contig1 |  | Y |   |  |  |      | TRUE |
| CL1514Contig1  | CL1514Contig1  |  | Y |   |  |  |      | TRUE |
| CL1514Contig2  | CL1514Contig2  |  | Y |   |  |  |      | TRUE |
| CL1516Contig1  | CL1516Contig1  |  | Y |   |  |  |      | TRUE |
| CL151Contig7   | CL151Contig7   |  | Y |   |  |  |      | TRUE |
| CL1521Contig6  | CL1521Contig6  |  | Y |   |  |  |      | TRUE |
| CL1526Contig4  | CL1526Contig4  |  | Y |   |  |  |      | TRUE |
| CL15300Contig1 | CL15300Contig1 |  | Y |   |  |  |      | TRUE |
| CL1537Contig3  | CL1537Contig3  |  | Y |   |  |  |      | TRUE |
| CL15423Contig1 | CL15423Contig1 |  | Y |   |  |  |      | TRUE |
| CL15462Contig1 | CL15462Contig1 |  | Y |   |  |  |      | TRUE |
| CL1561Contig1  | CL1561Contig1  |  | Y |   |  |  |      | TRUE |
| CL15740Contig1 | CL15740Contig1 |  | Y |   |  |  |      | TRUE |
| CL1590Contig4  | CL1590Contig4  |  | Y |   |  |  |      | TRUE |
| CL15935Contig1 | CL15935Contig1 |  | Y |   |  |  |      | TRUE |
| CL15Contig35   | CL15Contig35   |  | Y |   |  |  |      | TRUE |
| CL16029Contig1 | CL16029Contig1 |  | Y |   |  |  |      | TRUE |
| CL16085Contig1 | CL16085Contig1 |  | Y |   |  |  |      | TRUE |
| CL1612Contig3  | CL1612Contig3  |  | Y |   |  |  |      | TRUE |
| CL1614Contig1  | CL1614Contig1  |  | Y |   |  |  |      | TRUE |
| CL16239Contig1 | CL16239Contig1 |  | Y |   |  |  |      | TRUE |
| CL1634Contig3  | CL1634Contig3  |  | Y |   |  |  |      | TRUE |
| CL1646Contig4  | CL1646Contig4  |  | Y |   |  |  |      | TRUE |
| CL1649Contig3  | CL1649Contig3  |  | Y |   |  |  |      | TRUE |
| CL165Contig4   | CL165Contig4   |  | Y |   |  |  |      | TRUE |
| CL16756Contig1 | CL16756Contig1 |  | Y |   |  |  |      | TRUE |
| CL1686Contig3  | CL1686Contig3  |  | Y |   |  |  |      | TRUE |
| CL16886Contig1 | CL16886Contig1 |  | Y |   |  |  |      | TRUE |
| CL168Contig4   | CL168Contig4   |  | Y |   |  |  |      | TRUE |
| CL16992Contig1 | CL16992Contig1 |  | Y |   |  |  |      | TRUE |
| CL17062Contig1 | CL17062Contig1 |  | Y |   |  |  |      | TRUE |
| CL170Contig6   | CL170Contig6   |  | Y |   |  |  |      | TRUE |
| CL172Contig4   | CL172Contig4   |  | Y |   |  |  |      | TRUE |
| CL17316Contig1 | CL17316Contig1 |  | Y |   |  |  |      | TRUE |
| CL1738Contig5  | CL1738Contig5  |  | Y |   |  |  |      | TRUE |
| CL1744Contig2  | CL1744Contig2  |  | Y |   |  |  |      | TRUE |
| CL1744Contig3  | CL1744Contig3  |  | Y | Y |  |  | TRUE | TRUE |
| CL177Contig14  | CL177Contig14  |  | Y |   |  |  |      | TRUE |
| CL17976Contig1 | CL17976Contig1 |  | Y |   |  |  |      | TRUE |
| CL179Contig6   | CL179Contig6   |  | Y |   |  |  |      | TRUE |
| CL18115Contig1 | CL18115Contig1 |  | Y |   |  |  |      | TRUE |

|                    |                |           |   |   |  |   |  |      |      |
|--------------------|----------------|-----------|---|---|--|---|--|------|------|
| CL18181Contig1     | CL18181Contig1 |           | Y |   |  |   |  |      | TRUE |
| CL18182Contig1     | CL18182Contig1 |           | Y |   |  |   |  |      | TRUE |
| CL18313Contig1     | CL18313Contig1 |           | Y |   |  |   |  |      | TRUE |
| CL18378Contig1     | CL18378Contig1 |           | Y |   |  |   |  |      | TRUE |
| CL18444Contig1     | CL18444Contig1 |           | Y |   |  |   |  |      | TRUE |
| CL18445Contig1     | CL18445Contig1 |           | Y |   |  |   |  |      | TRUE |
| CL18484Contig1     | CL18484Contig1 |           | Y |   |  |   |  |      | TRUE |
| CL18578Contig1     | CL18578Contig1 |           | Y |   |  |   |  |      | TRUE |
| CL1858Contig3      | CL1858Contig3  |           | Y |   |  |   |  |      | TRUE |
| CL1862Contig2      | CL1862Contig2  |           | Y |   |  |   |  |      | TRUE |
| CL1879Contig3      | CL1879Contig3  |           | Y |   |  |   |  |      | TRUE |
| CL18839Contig1     | CL18839Contig1 |           | Y |   |  |   |  |      | TRUE |
| CL1907Contig1      | CL1907Contig1  |           | Y |   |  |   |  |      | TRUE |
| CL1917Contig1      | CL1917Contig1  |           | Y |   |  |   |  |      | TRUE |
| CL1918Contig5      | CL1918Contig5  |           | Y |   |  |   |  |      | TRUE |
| CL19221Contig1     | CL19221Contig1 |           | Y |   |  |   |  |      | TRUE |
| CL1930Contig6      | CL1930Contig6  |           | Y |   |  |   |  |      | TRUE |
| CL19415Contig1     | CL19415Contig1 |           | Y |   |  |   |  |      | TRUE |
| CL19436Contig1     | CL19436Contig1 |           | Y |   |  |   |  |      | TRUE |
| CL19605Contig1     | CL19605Contig1 |           | Y |   |  |   |  |      | TRUE |
| CL19729Contig1     | CL19729Contig1 |           | Y |   |  |   |  |      | TRUE |
| CL19751Contig1     | CL19751Contig1 |           | Y |   |  |   |  |      | TRUE |
| CL19761Contig1     | CL19761Contig1 |           | Y |   |  |   |  |      | TRUE |
| CL1984Contig5      | CL1984Contig5  |           | Y |   |  |   |  |      | TRUE |
| CL19Contig14       | CL19Contig14   |           | Y |   |  |   |  |      | TRUE |
| CL1Contig104       | CL1Contig104   |           | Y |   |  |   |  |      | TRUE |
| CL1Contig1051      | CL1Contig1051  |           | Y |   |  |   |  |      | TRUE |
| CL1Contig1089      | CL1Contig1089  |           | Y |   |  |   |  |      | TRUE |
| CL1Contig1160      | CL1Contig1160  |           | Y |   |  |   |  |      | TRUE |
| CL1Contig1293      | CL1Contig1293  |           | Y |   |  |   |  |      | TRUE |
| CL1Contig1406      | CL1Contig1406  |           | Y |   |  |   |  |      | TRUE |
| CL1Contig1594      | CL1Contig1594  |           | Y |   |  |   |  |      | TRUE |
| CL1Contig188       | CL1Contig188   |           | Y |   |  |   |  |      | TRUE |
| CL1Contig225       | CL1Contig225   |           | Y |   |  |   |  |      | TRUE |
| CL1Contig233       | CL1Contig233   |           | Y |   |  |   |  |      | TRUE |
| CL1Contig313       | CL1Contig313   |           | Y |   |  |   |  |      | TRUE |
| CL1Contig38;Q6AZS1 | CL1Contig38    | hist1h2ad | Y |   |  |   |  |      | TRUE |
| CL1Contig401       | CL1Contig401   |           | Y |   |  |   |  |      | TRUE |
| CL1Contig514       | CL1Contig514   |           | Y |   |  |   |  |      | TRUE |
| CL1Contig724       | CL1Contig724   |           | Y | Y |  | Y |  | TRUE | TRUE |
| CL1Contig796       | CL1Contig796   |           | Y |   |  |   |  |      | TRUE |
| CL1Contig80        | CL1Contig80    |           | Y | Y |  |   |  | TRUE | TRUE |
| CL1Contig883       | CL1Contig883   |           | Y |   |  |   |  |      | TRUE |
| CL2010Contig3      | CL2010Contig3  |           | Y |   |  |   |  |      | TRUE |
| CL20231Contig1     | CL20231Contig1 |           | Y |   |  |   |  |      | TRUE |
| CL2030Contig1      | CL2030Contig1  |           | Y |   |  |   |  |      | TRUE |
| CL20326Contig1     | CL20326Contig1 |           | Y |   |  |   |  |      | TRUE |
| CL20538Contig1     | CL20538Contig1 |           | Y |   |  |   |  |      | TRUE |
| CL20539Contig1     | CL20539Contig1 |           | Y |   |  |   |  |      | TRUE |
| CL20609Contig1     | CL20609Contig1 |           | Y |   |  |   |  |      | TRUE |
| CL2090Contig1      | CL2090Contig1  |           | Y |   |  |   |  |      | TRUE |
| CL2091Contig2      | CL2091Contig2  |           | Y |   |  |   |  |      | TRUE |
| CL2097Contig2      | CL2097Contig2  |           | Y | Y |  |   |  | TRUE | TRUE |
| CL210Contig6       | CL210Contig6   |           | Y |   |  |   |  |      | TRUE |
| CL21287Contig1     | CL21287Contig1 |           | Y |   |  |   |  |      | TRUE |
| CL212Contig6       | CL212Contig6   |           | Y |   |  |   |  |      | TRUE |
| CL214Contig10      | CL214Contig10  |           | Y |   |  |   |  |      | TRUE |
| CL2159Contig1      | CL2159Contig1  |           | Y |   |  |   |  |      | TRUE |
| CL21870Contig1     | CL21870Contig1 |           | Y | Y |  |   |  | TRUE | TRUE |
| CL2188Contig3      | CL2188Contig3  |           | Y |   |  |   |  |      | TRUE |
| CL2190Contig2      | CL2190Contig2  |           | Y |   |  |   |  |      | TRUE |
| CL21961Contig1     | CL21961Contig1 |           | Y |   |  |   |  |      | TRUE |
| CL2211Contig3      | CL2211Contig3  |           | Y |   |  |   |  |      | TRUE |
| CL22213Contig1     | CL22213Contig1 |           | Y |   |  |   |  |      | TRUE |
| CL22667Contig1     | CL22667Contig1 |           | Y |   |  |   |  |      | TRUE |
| CL22Contig18       | CL22Contig18   |           | Y |   |  |   |  |      | TRUE |
| CL23092Contig1     | CL23092Contig1 |           | Y |   |  |   |  |      | TRUE |
| CL231Contig1       | CL231Contig1   |           | Y |   |  |   |  |      | TRUE |
| CL2321Contig3      | CL2321Contig3  |           | Y |   |  |   |  |      | TRUE |
| CL2335Contig1      | CL2335Contig1  |           | Y |   |  |   |  |      | TRUE |
| CL2344Contig1      | CL2344Contig1  |           | Y | Y |  |   |  | TRUE | TRUE |
| CL23662Contig1     | CL23662Contig1 |           | Y |   |  |   |  |      | TRUE |
| CL2373Contig1      | CL2373Contig1  |           | Y |   |  |   |  |      | TRUE |
| CL23927Contig1     | CL23927Contig1 |           | Y |   |  |   |  |      | TRUE |
| CL2400Contig2      | CL2400Contig2  |           | Y | Y |  |   |  | TRUE | TRUE |
| CL2402Contig2      | CL2402Contig2  |           | Y |   |  |   |  |      | TRUE |
| CL2428Contig5      | CL2428Contig5  |           | Y |   |  |   |  |      | TRUE |
| CL2431Contig4      | CL2431Contig4  |           | Y |   |  |   |  |      | TRUE |
| CL24495Contig1     | CL24495Contig1 |           | Y |   |  |   |  |      | TRUE |
| CL2453Contig4      | CL2453Contig4  |           | Y |   |  |   |  |      | TRUE |
| CL2457Contig1      | CL2457Contig1  |           | Y |   |  |   |  |      | TRUE |
| CL246Contig8       | CL246Contig8   |           | Y |   |  |   |  |      | TRUE |
| CL24722Contig1     | CL24722Contig1 |           | Y |   |  |   |  |      | TRUE |
| CL24837Contig1     | CL24837Contig1 |           | Y |   |  |   |  |      | TRUE |
| CL24838Contig1     | CL24838Contig1 |           | Y |   |  |   |  |      | TRUE |
| CL24855Contig1     | CL24855Contig1 |           | Y |   |  |   |  |      | TRUE |

|                      |                |       |   |   |   |  |  |  |      |      |
|----------------------|----------------|-------|---|---|---|--|--|--|------|------|
| CL2502Contig4        | CL2502Contig4  |       | Y |   |   |  |  |  | TRUE | TRUE |
| CL25067Contig1       | CL25067Contig1 |       | Y | Y |   |  |  |  | TRUE | TRUE |
| CL2520Contig2        | CL2520Contig2  |       | Y |   |   |  |  |  |      | TRUE |
| CL25284Contig1       | CL25284Contig1 |       | Y |   |   |  |  |  |      | TRUE |
| CL2535Contig5        | CL2535Contig5  |       | Y |   |   |  |  |  |      | TRUE |
| CL25436Contig1       | CL25436Contig1 |       | Y |   |   |  |  |  |      | TRUE |
| CL2547Contig3        | CL2547Contig3  |       | Y |   |   |  |  |  |      | TRUE |
| CL2554Contig1        | CL2554Contig1  |       | Y |   |   |  |  |  |      | TRUE |
| CL25612Contig1       | CL25612Contig1 |       | Y |   |   |  |  |  |      | TRUE |
| CL2595Contig2        | CL2595Contig2  |       | Y |   |   |  |  |  |      | TRUE |
| CL2615Contig3        | CL2615Contig3  |       | Y | Y |   |  |  |  | TRUE | TRUE |
| CL26177Contig1       | CL26177Contig1 |       | Y |   |   |  |  |  |      | TRUE |
| CL26319Contig1       | CL26319Contig1 |       | Y |   |   |  |  |  |      | TRUE |
| CL26334Contig1       | CL26334Contig1 |       | Y |   |   |  |  |  |      | TRUE |
| CL26381Contig1       | CL26381Contig1 |       | Y |   |   |  |  |  |      | TRUE |
| CL26535Contig1       | CL26535Contig1 |       | Y |   |   |  |  |  |      | TRUE |
| CL2663Contig2        | CL2663Contig2  |       | Y |   |   |  |  |  |      | TRUE |
| CL2664Contig2        | CL2664Contig2  |       | Y |   |   |  |  |  |      | TRUE |
| CL2667Contig4        | CL2667Contig4  |       | Y |   |   |  |  |  |      | TRUE |
| CL2670Contig1        | CL2670Contig1  |       | Y |   |   |  |  |  |      | TRUE |
| CL2685Contig1        | CL2685Contig1  |       | Y | Y |   |  |  |  | TRUE | TRUE |
| CL2685Contig3        | CL2685Contig3  |       | Y |   |   |  |  |  |      | TRUE |
| CL2691Contig4        | CL2691Contig4  |       | Y |   |   |  |  |  |      | TRUE |
| CL2693Contig2        | CL2693Contig2  |       | Y |   |   |  |  |  |      | TRUE |
| CL27024Contig1       | CL27024Contig1 |       | Y |   |   |  |  |  |      | TRUE |
| CL2715Contig5        | CL2715Contig5  |       | Y |   |   |  |  |  |      | TRUE |
| CL27242Contig1       | CL27242Contig1 |       | Y |   |   |  |  |  |      | TRUE |
| CL2732Contig1        | CL2732Contig1  |       | Y |   |   |  |  |  |      | TRUE |
| CL27337Contig1       | CL27337Contig1 |       | Y |   |   |  |  |  |      | TRUE |
| CL27618Contig1       | CL27618Contig1 |       | Y |   |   |  |  |  |      | TRUE |
| CL2776Contig2        | CL2776Contig2  |       | Y |   |   |  |  |  |      | TRUE |
| CL2808Contig3        | CL2808Contig3  |       | Y |   |   |  |  |  |      | TRUE |
| CL2814Contig2        | CL2814Contig2  |       | Y |   |   |  |  |  |      | TRUE |
| CL282Contig6         | CL282Contig6   |       | Y |   |   |  |  |  |      | TRUE |
| CL2859Contig3        | CL2859Contig3  |       | Y |   |   |  |  |  |      | TRUE |
| CL2865Contig2        | CL2865Contig2  |       | Y |   |   |  |  |  |      | TRUE |
| CL2871Contig3        | CL2871Contig3  |       | Y |   |   |  |  |  |      | TRUE |
| CL2885Contig1;Q91929 | CL2885Contig1  | sall3 | Y |   | Y |  |  |  | TRUE | TRUE |
| CL2920Contig1        | CL2920Contig1  |       | Y |   |   |  |  |  |      | TRUE |
| CL2940Contig3        | CL2940Contig3  |       | Y |   |   |  |  |  |      | TRUE |
| CL29560Contig1       | CL29560Contig1 |       | Y |   |   |  |  |  |      | TRUE |
| CL29572Contig1       | CL29572Contig1 |       | Y |   |   |  |  |  |      | TRUE |
| CL2976Contig2        | CL2976Contig2  |       | Y |   |   |  |  |  |      | TRUE |
| CL2985Contig3        | CL2985Contig3  |       | Y |   |   |  |  |  |      | TRUE |
| CL2995Contig3        | CL2995Contig3  |       | Y |   |   |  |  |  |      | TRUE |
| CL29Contig2;Q52L23   | CL29Contig2    |       | Y |   |   |  |  |  |      | TRUE |
| CL30078Contig1       | CL30078Contig1 |       | Y |   |   |  |  |  |      | TRUE |
| CL30361Contig1       | CL30361Contig1 |       | Y |   |   |  |  |  |      | TRUE |
| CL303Contig2         | CL303Contig2   |       | Y |   |   |  |  |  |      | TRUE |
| CL303Contig6         | CL303Contig6   |       | Y |   |   |  |  |  |      | TRUE |
| CL30676Contig1       | CL30676Contig1 |       | Y |   |   |  |  |  |      | TRUE |
| CL3074Contig3        | CL3074Contig3  |       | Y |   |   |  |  |  |      | TRUE |
| CL3078Contig2        | CL3078Contig2  |       | Y |   |   |  |  |  |      | TRUE |
| CL3082Contig2        | CL3082Contig2  |       | Y |   |   |  |  |  |      | TRUE |
| CL31289Contig1       | CL31289Contig1 |       | Y |   |   |  |  |  |      | TRUE |
| CL313Contig1         | CL313Contig1   |       | Y |   |   |  |  |  |      | TRUE |
| CL3143Contig2        | CL3143Contig2  |       | Y |   |   |  |  |  |      | TRUE |
| CL314Contig2         | CL314Contig2   |       | Y |   |   |  |  |  |      | TRUE |
| CL3167Contig3        | CL3167Contig3  |       | Y |   |   |  |  |  |      | TRUE |
| CL31693Contig1       | CL31693Contig1 |       | Y |   |   |  |  |  |      | TRUE |
| CL3171Contig1        | CL3171Contig1  |       | Y |   |   |  |  |  |      | TRUE |
| CL3223Contig1        | CL3223Contig1  |       | Y |   |   |  |  |  |      | TRUE |
| CL32492Contig1       | CL32492Contig1 |       | Y |   |   |  |  |  |      | TRUE |
| CL3255Contig1        | CL3255Contig1  |       | Y |   |   |  |  |  |      | TRUE |
| CL32735Contig1       | CL32735Contig1 |       | Y |   |   |  |  |  |      | TRUE |
| CL3273Contig1        | CL3273Contig1  |       | Y |   |   |  |  |  |      | TRUE |
| CL3295Contig3        | CL3295Contig3  |       | Y |   |   |  |  |  |      | TRUE |
| CL33207Contig1       | CL33207Contig1 |       | Y |   |   |  |  |  |      | TRUE |
| CL3320Contig1        | CL3320Contig1  |       | Y |   |   |  |  |  |      | TRUE |
| CL3394Contig2        | CL3394Contig2  |       | Y |   |   |  |  |  |      | TRUE |
| CL3413Contig3        | CL3413Contig3  |       | Y |   |   |  |  |  |      | TRUE |
| CL3418Contig2        | CL3418Contig2  |       | Y | Y |   |  |  |  | TRUE | TRUE |
| CL342Contig4         | CL342Contig4   |       | Y |   |   |  |  |  |      | TRUE |
| CL3453Contig2        | CL3453Contig2  |       | Y |   |   |  |  |  |      | TRUE |
| CL3458Contig1        | CL3458Contig1  |       | Y |   |   |  |  |  |      | TRUE |
| CL3472Contig1        | CL3472Contig1  |       | Y |   |   |  |  |  |      | TRUE |
| CL34836Contig1       | CL34836Contig1 |       | Y |   |   |  |  |  |      | TRUE |
| CL34839Contig1       | CL34839Contig1 |       | Y |   |   |  |  |  |      | TRUE |
| CL348Contig2         | CL348Contig2   |       | Y |   |   |  |  |  |      | TRUE |
| CL3508Contig1        | CL3508Contig1  |       | Y |   |   |  |  |  |      | TRUE |
| CL3510Contig2        | CL3510Contig2  |       | Y |   |   |  |  |  |      | TRUE |
| CL3520Contig1        | CL3520Contig1  |       | Y |   |   |  |  |  |      | TRUE |
| CL3547Contig2        | CL3547Contig2  |       | Y |   |   |  |  |  |      | TRUE |
| CL3551Contig4        | CL3551Contig4  |       | Y |   |   |  |  |  |      | TRUE |
| CL3570Contig2        | CL3570Contig2  |       | Y |   |   |  |  |  |      | TRUE |
| CL35835Contig1       | CL35835Contig1 |       | Y |   |   |  |  |  |      | TRUE |



|                |                |  |   |   |  |  |  |      |      |
|----------------|----------------|--|---|---|--|--|--|------|------|
| CL3597Contig1  | CL3597Contig1  |  | Y |   |  |  |  |      | TRUE |
| CL359Contig3   | CL359Contig3   |  | Y |   |  |  |  |      | TRUE |
| CL363Contig1   | CL363Contig1   |  | Y |   |  |  |  |      | TRUE |
| CL3649Contig1  | CL3649Contig1  |  | Y |   |  |  |  |      | TRUE |
| CL36693Contig1 | CL36693Contig1 |  | Y |   |  |  |  |      | TRUE |
| CL3688Contig1  | CL3688Contig1  |  | Y |   |  |  |  |      | TRUE |
| CL3689Contig1  | CL3689Contig1  |  | Y |   |  |  |  |      | TRUE |
| CL36962Contig1 | CL36962Contig1 |  | Y |   |  |  |  |      | TRUE |
| CL369Contig2   | CL369Contig2   |  | Y |   |  |  |  |      | TRUE |
| CL3705Contig2  | CL3705Contig2  |  | Y |   |  |  |  |      | TRUE |
| CL3713Contig2  | CL3713Contig2  |  | Y |   |  |  |  |      | TRUE |
| CL3728Contig4  | CL3728Contig4  |  | Y |   |  |  |  |      | TRUE |
| CL3733Contig2  | CL3733Contig2  |  | Y |   |  |  |  |      | TRUE |
| CL37387Contig1 | CL37387Contig1 |  | Y |   |  |  |  |      | TRUE |
| CL3741Contig1  | CL3741Contig1  |  | Y |   |  |  |  |      | TRUE |
| CL3748Contig3  | CL3748Contig3  |  | Y |   |  |  |  |      | TRUE |
| CL3782Contig1  | CL3782Contig1  |  | Y |   |  |  |  |      | TRUE |
| CL37975Contig1 | CL37975Contig1 |  | Y |   |  |  |  |      | TRUE |
| CL3802Contig1  | CL3802Contig1  |  | Y |   |  |  |  |      | TRUE |
| CL3824Contig1  | CL3824Contig1  |  | Y |   |  |  |  |      | TRUE |
| CL38290Contig1 | CL38290Contig1 |  | Y |   |  |  |  |      | TRUE |
| CL38387Contig1 | CL38387Contig1 |  | Y |   |  |  |  |      | TRUE |
| CL384Contig6   | CL384Contig6   |  | Y |   |  |  |  |      | TRUE |
| CL38637Contig1 | CL38637Contig1 |  | Y |   |  |  |  |      | TRUE |
| CL38685Contig1 | CL38685Contig1 |  | Y |   |  |  |  |      | TRUE |
| CL3868Contig2  | CL3868Contig2  |  | Y |   |  |  |  |      | TRUE |
| CL38748Contig1 | CL38748Contig1 |  | Y |   |  |  |  |      | TRUE |
| CL3876Contig1  | CL3876Contig1  |  | Y |   |  |  |  |      | TRUE |
| CL3902Contig1  | CL3902Contig1  |  | Y |   |  |  |  |      | TRUE |
| CL3908Contig1  | CL3908Contig1  |  | Y |   |  |  |  |      | TRUE |
| CL3915Contig2  | CL3915Contig2  |  | Y |   |  |  |  |      | TRUE |
| CL3941Contig2  | CL3941Contig2  |  | Y | Y |  |  |  | TRUE | TRUE |
| CL39443Contig1 | CL39443Contig1 |  | Y |   |  |  |  |      | TRUE |
| CL39486Contig1 | CL39486Contig1 |  | Y |   |  |  |  |      | TRUE |
| CL39507Contig1 | CL39507Contig1 |  | Y |   |  |  |  |      | TRUE |
| CL39615Contig1 | CL39615Contig1 |  | Y |   |  |  |  |      | TRUE |
| CL3Contig34    | CL3Contig34    |  | Y |   |  |  |  |      | TRUE |
| CL3Contig50    | CL3Contig50    |  | Y |   |  |  |  |      | TRUE |
| CL40164Contig1 | CL40164Contig1 |  | Y |   |  |  |  |      | TRUE |
| CL40442Contig1 | CL40442Contig1 |  | Y |   |  |  |  |      | TRUE |
| CL40454Contig1 | CL40454Contig1 |  | Y |   |  |  |  |      | TRUE |
| CL4060Contig1  | CL4060Contig1  |  | Y |   |  |  |  |      | TRUE |
| CL4061Contig2  | CL4061Contig2  |  | Y |   |  |  |  |      | TRUE |
| CL4098Contig1  | CL4098Contig1  |  | Y |   |  |  |  |      | TRUE |
| CL4119Contig1  | CL4119Contig1  |  | Y |   |  |  |  |      | TRUE |
| CL4120Contig1  | CL4120Contig1  |  | Y |   |  |  |  |      | TRUE |
| CL4122Contig1  | CL4122Contig1  |  | Y |   |  |  |  |      | TRUE |
| CL4145Contig1  | CL4145Contig1  |  | Y |   |  |  |  |      | TRUE |
| CL4151Contig1  | CL4151Contig1  |  | Y |   |  |  |  |      | TRUE |
| CL4162Contig1  | CL4162Contig1  |  | Y |   |  |  |  |      | TRUE |
| CL416Contig6   | CL416Contig6   |  | Y |   |  |  |  |      | TRUE |
| CL4179Contig1  | CL4179Contig1  |  | Y |   |  |  |  |      | TRUE |
| CL4179Contig3  | CL4179Contig3  |  | Y |   |  |  |  |      | TRUE |
| CL419Contig8   | CL419Contig8   |  | Y |   |  |  |  |      | TRUE |
| CL41Contig15   | CL41Contig15   |  | Y |   |  |  |  |      | TRUE |
| CL4205Contig2  | CL4205Contig2  |  | Y |   |  |  |  |      | TRUE |
| CL42239Contig1 | CL42239Contig1 |  | Y |   |  |  |  |      | TRUE |
| CL4229Contig1  | CL4229Contig1  |  | Y |   |  |  |  |      | TRUE |
| CL42352Contig1 | CL42352Contig1 |  | Y |   |  |  |  |      | TRUE |
| CL42522Contig1 | CL42522Contig1 |  | Y |   |  |  |  |      | TRUE |
| CL4254Contig2  | CL4254Contig2  |  | Y |   |  |  |  |      | TRUE |
| CL4263Contig3  | CL4263Contig3  |  | Y |   |  |  |  |      | TRUE |
| CL4288Contig3  | CL4288Contig3  |  | Y |   |  |  |  |      | TRUE |
| CL43176Contig1 | CL43176Contig1 |  | Y |   |  |  |  |      | TRUE |
| CL4320Contig3  | CL4320Contig3  |  | Y |   |  |  |  |      | TRUE |
| CL43675Contig1 | CL43675Contig1 |  | Y |   |  |  |  |      | TRUE |
| CL4370Contig2  | CL4370Contig2  |  | Y |   |  |  |  |      | TRUE |
| CL4405Contig1  | CL4405Contig1  |  | Y |   |  |  |  |      | TRUE |
| CL4408Contig3  | CL4408Contig3  |  | Y |   |  |  |  |      | TRUE |
| CL4417Contig1  | CL4417Contig1  |  | Y |   |  |  |  |      | TRUE |
| CL44219Contig1 | CL44219Contig1 |  | Y |   |  |  |  |      | TRUE |
| CL444Contig2   | CL444Contig2   |  | Y |   |  |  |  |      | TRUE |
| CL44634Contig1 | CL44634Contig1 |  | Y |   |  |  |  |      | TRUE |
| CL4464Contig2  | CL4464Contig2  |  | Y |   |  |  |  |      | TRUE |
| CL4493Contig1  | CL4493Contig1  |  | Y |   |  |  |  |      | TRUE |
| CL4517Contig2  | CL4517Contig2  |  | Y |   |  |  |  |      | TRUE |
| CL451Contig4   | CL451Contig4   |  | Y |   |  |  |  |      | TRUE |
| CL45523Contig1 | CL45523Contig1 |  | Y |   |  |  |  |      | TRUE |
| CL4552Contig2  | CL4552Contig2  |  | Y |   |  |  |  |      | TRUE |
| CL4552Contig3  | CL4552Contig3  |  | Y |   |  |  |  |      | TRUE |
| CL45622Contig1 | CL45622Contig1 |  | Y |   |  |  |  |      | TRUE |
| CL4566Contig2  | CL4566Contig2  |  | Y |   |  |  |  |      | TRUE |
| CL4580Contig2  | CL4580Contig2  |  | Y |   |  |  |  |      | TRUE |
| CL45Contig20   | CL45Contig20   |  | Y |   |  |  |  |      | TRUE |
| CL45Contig21   | CL45Contig21   |  | Y |   |  |  |  |      | TRUE |
| CL4601Contig1  | CL4601Contig1  |  | Y |   |  |  |  |      | TRUE |

|                      |                |        |   |   |   |  |      |      |
|----------------------|----------------|--------|---|---|---|--|------|------|
| CL4603Contig2        | CL4603Contig2  |        | Y |   |   |  |      | TRUE |
| CL46044Contig1       | CL46044Contig1 |        | Y |   |   |  |      | TRUE |
| CL463Contig1         | CL463Contig1   |        | Y |   |   |  |      | TRUE |
| CL4652Contig3        | CL4652Contig3  |        | Y |   |   |  |      | TRUE |
| CL465Contig2         | CL465Contig2   |        | Y |   |   |  |      | TRUE |
| CL465Contig6         | CL465Contig6   |        | Y |   |   |  |      | TRUE |
| CL4674Contig1        | CL4674Contig1  |        | Y |   |   |  |      | TRUE |
| CL467Contig1         | CL467Contig1   |        | Y |   |   |  |      | TRUE |
| CL4688Contig1;Q6DE33 | CL4688Contig1  | uqrc2  | Y |   | Y |  | TRUE | TRUE |
| CL46Contig4          | CL46Contig4    |        | Y |   |   |  |      | TRUE |
| CL471Contig2         | CL471Contig2   |        | Y |   |   |  |      | TRUE |
| CL4725Contig2        | CL4725Contig2  |        | Y |   |   |  |      | TRUE |
| CL4732Contig1        | CL4732Contig1  |        | Y |   |   |  |      | TRUE |
| CL4762Contig1        | CL4762Contig1  |        | Y |   |   |  |      | TRUE |
| CL4772Contig2        | CL4772Contig2  |        | Y |   |   |  |      | TRUE |
| CL4774Contig1        | CL4774Contig1  |        | Y |   |   |  |      | TRUE |
| CL4783Contig2        | CL4783Contig2  |        | Y |   |   |  |      | TRUE |
| CL4793Contig1        | CL4793Contig1  |        | Y |   |   |  |      | TRUE |
| CL4874Contig2        | CL4874Contig2  |        | Y |   |   |  |      | TRUE |
| CL489Contig1         | CL489Contig1   |        | Y |   |   |  |      | TRUE |
| CL48Contig6          | CL48Contig6    |        | Y |   |   |  |      | TRUE |
| CL4908Contig3        | CL4908Contig3  |        | Y |   |   |  |      | TRUE |
| CL4920Contig1        | CL4920Contig1  |        | Y |   |   |  |      | TRUE |
| CL4927Contig4        | CL4927Contig4  |        | Y |   |   |  |      | TRUE |
| CL4966Contig2        | CL4966Contig2  |        | Y | Y |   |  | TRUE | TRUE |
| CL4967Contig1        | CL4967Contig1  |        | Y |   |   |  |      | TRUE |
| CL4999Contig1        | CL4999Contig1  |        | Y |   |   |  |      | TRUE |
| CL5041Contig1        | CL5041Contig1  |        | Y |   |   |  |      | TRUE |
| CL5080Contig4        | CL5080Contig4  |        | Y |   |   |  |      | TRUE |
| CL508Contig4         | CL508Contig4   |        | Y |   |   |  |      | TRUE |
| CL5147Contig1        | CL5147Contig1  |        | Y |   |   |  |      | TRUE |
| CL5186Contig1        | CL5186Contig1  |        | Y |   |   |  |      | TRUE |
| CL5194Contig2        | CL5194Contig2  |        | Y |   |   |  |      | TRUE |
| CL51Contig4          | CL51Contig4    |        | Y |   |   |  |      | TRUE |
| CL5205Contig2        | CL5205Contig2  |        | Y |   |   |  |      | TRUE |
| CL521Contig1         | CL521Contig1   |        | Y |   |   |  |      | TRUE |
| CL5248Contig1        | CL5248Contig1  |        | Y |   |   |  |      | TRUE |
| CL5272Contig3        | CL5272Contig3  |        | Y |   |   |  |      | TRUE |
| CL5303Contig1        | CL5303Contig1  |        | Y |   |   |  |      | TRUE |
| CL5308Contig2        | CL5308Contig2  |        | Y |   |   |  |      | TRUE |
| CL5313Contig2        | CL5313Contig2  |        | Y |   |   |  |      | TRUE |
| CL5360Contig1        | CL5360Contig1  |        | Y |   |   |  |      | TRUE |
| CL5360Contig2        | CL5360Contig2  |        | Y |   |   |  |      | TRUE |
| CL5361Contig2        | CL5361Contig2  |        | Y |   |   |  |      | TRUE |
| CL5368Contig2        | CL5368Contig2  |        | Y |   |   |  |      | TRUE |
| CL540Contig10        | CL540Contig10  |        | Y |   |   |  |      | TRUE |
| CL5432Contig1        | CL5432Contig1  |        | Y |   |   |  |      | TRUE |
| CL5444Contig1        | CL5444Contig1  |        | Y |   |   |  |      | TRUE |
| CL5478Contig2        | CL5478Contig2  |        | Y |   |   |  |      | TRUE |
| CL5525Contig1        | CL5525Contig1  |        | Y |   |   |  |      | TRUE |
| CL5527Contig2        | CL5527Contig2  |        | Y |   |   |  |      | TRUE |
| CL5540Contig2;Q7ZX92 | CL5540Contig2  | psmd14 | Y |   | Y |  | TRUE | TRUE |
| CL5553Contig1        | CL5553Contig1  |        | Y |   |   |  |      | TRUE |
| CL557Contig6         | CL557Contig6   |        | Y |   |   |  |      | TRUE |
| CL569Contig8         | CL569Contig8   |        | Y |   |   |  |      | TRUE |
| CL5725Contig1        | CL5725Contig1  |        | Y |   |   |  |      | TRUE |
| CL5749Contig1        | CL5749Contig1  |        | Y |   |   |  |      | TRUE |
| CL574Contig9         | CL574Contig9   |        | Y |   |   |  |      | TRUE |
| CL5772Contig2        | CL5772Contig2  |        | Y |   |   |  |      | TRUE |
| CL5779Contig1        | CL5779Contig1  |        | Y |   |   |  |      | TRUE |
| CL5832Contig1        | CL5832Contig1  |        | Y | Y |   |  | TRUE | TRUE |
| CL589Contig1         | CL589Contig1   |        | Y |   |   |  |      | TRUE |
| CL593Contig1         | CL593Contig1   |        | Y |   |   |  |      | TRUE |
| CL5962Contig1        | CL5962Contig1  |        | Y |   |   |  |      | TRUE |
| CL596Contig6         | CL596Contig6   |        | Y |   |   |  |      | TRUE |
| CL5978Contig1        | CL5978Contig1  |        | Y |   |   |  |      | TRUE |
| CL6016Contig1        | CL6016Contig1  |        | Y |   |   |  |      | TRUE |
| CL6084Contig1        | CL6084Contig1  |        | Y |   |   |  |      | TRUE |
| CL6135Contig2        | CL6135Contig2  |        | Y |   |   |  |      | TRUE |
| CL6182Contig1        | CL6182Contig1  |        | Y |   |   |  |      | TRUE |
| CL620Contig2         | CL620Contig2   |        | Y |   |   |  |      | TRUE |
| CL6214Contig1        | CL6214Contig1  |        | Y |   |   |  |      | TRUE |
| CL6298Contig1        | CL6298Contig1  |        | Y |   |   |  |      | TRUE |
| CL6316Contig1        | CL6316Contig1  |        | Y |   |   |  |      | TRUE |
| CL6334Contig1        | CL6334Contig1  |        | Y |   |   |  |      | TRUE |
| CL6354Contig1        | CL6354Contig1  |        | Y |   |   |  |      | TRUE |
| CL640Contig7         | CL640Contig7   |        | Y |   |   |  |      | TRUE |
| CL6476Contig1        | CL6476Contig1  |        | Y |   |   |  |      | TRUE |
| CL6498Contig1        | CL6498Contig1  |        | Y |   |   |  |      | TRUE |
| CL64Contig5          | CL64Contig5    |        | Y |   |   |  |      | TRUE |
| CL6506Contig2        | CL6506Contig2  |        | Y |   |   |  |      | TRUE |
| CL6521Contig1        | CL6521Contig1  |        | Y |   |   |  |      | TRUE |
| CL6529Contig1        | CL6529Contig1  |        | Y |   |   |  |      | TRUE |
| CL654Contig1         | CL654Contig1   |        | Y |   |   |  |      | TRUE |
| CL654Contig4         | CL654Contig4   |        | Y | Y |   |  | TRUE | TRUE |
| CL657Contig3         | CL657Contig3   |        | Y |   |   |  |      | TRUE |

|               |               |  |   |   |  |  |  |      |      |
|---------------|---------------|--|---|---|--|--|--|------|------|
| CL6589Contig1 | CL6589Contig1 |  | Y |   |  |  |  |      | TRUE |
| CL6622Contig2 | CL6622Contig2 |  | Y |   |  |  |  |      | TRUE |
| CL6653Contig3 | CL6653Contig3 |  | Y |   |  |  |  |      | TRUE |
| CL6658Contig2 | CL6658Contig2 |  | Y |   |  |  |  |      | TRUE |
| CL665Contig1  | CL665Contig1  |  | Y |   |  |  |  |      | TRUE |
| CL665Contig7  | CL665Contig7  |  | Y | Y |  |  |  | TRUE | TRUE |
| CL6693Contig1 | CL6693Contig1 |  | Y |   |  |  |  |      | TRUE |
| CL66Contig6   | CL66Contig6   |  | Y |   |  |  |  |      | TRUE |
| CL671Contig6  | CL671Contig6  |  | Y |   |  |  |  |      | TRUE |
| CL6737Contig1 | CL6737Contig1 |  | Y |   |  |  |  |      | TRUE |
| CL673Contig2  | CL673Contig2  |  | Y |   |  |  |  |      | TRUE |
| CL674Contig4  | CL674Contig4  |  | Y |   |  |  |  |      | TRUE |
| CL6751Contig3 | CL6751Contig3 |  | Y |   |  |  |  |      | TRUE |
| CL6788Contig2 | CL6788Contig2 |  | Y |   |  |  |  |      | TRUE |
| CL6843Contig1 | CL6843Contig1 |  | Y |   |  |  |  |      | TRUE |
| CL6849Contig3 | CL6849Contig3 |  | Y |   |  |  |  |      | TRUE |
| CL6862Contig2 | CL6862Contig2 |  | Y |   |  |  |  |      | TRUE |
| CL6870Contig2 | CL6870Contig2 |  | Y |   |  |  |  |      | TRUE |
| CL6944Contig2 | CL6944Contig2 |  | Y |   |  |  |  |      | TRUE |
| CL6953Contig2 | CL6953Contig2 |  | Y |   |  |  |  |      | TRUE |
| CL6998Contig1 | CL6998Contig1 |  | Y |   |  |  |  |      | TRUE |
| CL7008Contig1 | CL7008Contig1 |  | Y |   |  |  |  |      | TRUE |
| CL7022Contig2 | CL7022Contig2 |  | Y |   |  |  |  |      | TRUE |
| CL7044Contig1 | CL7044Contig1 |  | Y |   |  |  |  |      | TRUE |
| CL7064Contig1 | CL7064Contig1 |  | Y |   |  |  |  |      | TRUE |
| CL7083Contig3 | CL7083Contig3 |  | Y |   |  |  |  |      | TRUE |
| CL7087Contig1 | CL7087Contig1 |  | Y |   |  |  |  |      | TRUE |
| CL709Contig6  | CL709Contig6  |  | Y |   |  |  |  |      | TRUE |
| CL7101Contig2 | CL7101Contig2 |  | Y |   |  |  |  |      | TRUE |
| CL71Contig1   | CL71Contig1   |  | Y |   |  |  |  |      | TRUE |
| CL7240Contig1 | CL7240Contig1 |  | Y |   |  |  |  |      | TRUE |
| CL724Contig1  | CL724Contig1  |  | Y |   |  |  |  |      | TRUE |
| CL724Contig2  | CL724Contig2  |  | Y |   |  |  |  |      | TRUE |
| CL728Contig4  | CL728Contig4  |  | Y |   |  |  |  |      | TRUE |
| CL7317Contig1 | CL7317Contig1 |  | Y |   |  |  |  |      | TRUE |
| CL7394Contig1 | CL7394Contig1 |  | Y |   |  |  |  |      | TRUE |
| CL742Contig3  | CL742Contig3  |  | Y |   |  |  |  |      | TRUE |
| CL7447Contig1 | CL7447Contig1 |  | Y |   |  |  |  |      | TRUE |
| CL7485Contig1 | CL7485Contig1 |  | Y |   |  |  |  |      | TRUE |
| CL7498Contig1 | CL7498Contig1 |  | Y |   |  |  |  |      | TRUE |
| CL7517Contig1 | CL7517Contig1 |  | Y |   |  |  |  |      | TRUE |
| CL7560Contig1 | CL7560Contig1 |  | Y |   |  |  |  |      | TRUE |
| CL758Contig4  | CL758Contig4  |  | Y |   |  |  |  |      | TRUE |
| CL7602Contig2 | CL7602Contig2 |  | Y |   |  |  |  |      | TRUE |
| CL7605Contig2 | CL7605Contig2 |  | Y |   |  |  |  |      | TRUE |
| CL760Contig2  | CL760Contig2  |  | Y |   |  |  |  |      | TRUE |
| CL7666Contig1 | CL7666Contig1 |  | Y |   |  |  |  |      | TRUE |
| CL7679Contig1 | CL7679Contig1 |  | Y |   |  |  |  |      | TRUE |
| CL7768Contig1 | CL7768Contig1 |  | Y |   |  |  |  |      | TRUE |
| CL7800Contig2 | CL7800Contig2 |  | Y |   |  |  |  |      | TRUE |
| CL7840Contig1 | CL7840Contig1 |  | Y |   |  |  |  |      | TRUE |
| CL7875Contig1 | CL7875Contig1 |  | Y |   |  |  |  |      | TRUE |
| CL78Contig6   | CL78Contig6   |  | Y |   |  |  |  |      | TRUE |
| CL791Contig1  | CL791Contig1  |  | Y |   |  |  |  |      | TRUE |
| CL7944Contig1 | CL7944Contig1 |  | Y |   |  |  |  |      | TRUE |
| CL794Contig1  | CL794Contig1  |  | Y |   |  |  |  |      | TRUE |
| CL7956Contig1 | CL7956Contig1 |  | Y |   |  |  |  |      | TRUE |
| CL7985Contig2 | CL7985Contig2 |  | Y |   |  |  |  |      | TRUE |
| CL800Contig5  | CL800Contig5  |  | Y |   |  |  |  |      | TRUE |
| CL8013Contig1 | CL8013Contig1 |  | Y |   |  |  |  |      | TRUE |
| CL801Contig1  | CL801Contig1  |  | Y | Y |  |  |  | TRUE | TRUE |
| CL8066Contig1 | CL8066Contig1 |  | Y |   |  |  |  |      | TRUE |
| CL8107Contig2 | CL8107Contig2 |  | Y |   |  |  |  |      | TRUE |
| CL821Contig1  | CL821Contig1  |  | Y |   |  |  |  |      | TRUE |
| CL8237Contig1 | CL8237Contig1 |  | Y |   |  |  |  |      | TRUE |
| CL825Contig2  | CL825Contig2  |  | Y |   |  |  |  |      | TRUE |
| CL826Contig4  | CL826Contig4  |  | Y |   |  |  |  |      | TRUE |
| CL8282Contig1 | CL8282Contig1 |  | Y |   |  |  |  |      | TRUE |
| CL8325Contig2 | CL8325Contig2 |  | Y |   |  |  |  |      | TRUE |
| CL84Contig2   | CL84Contig2   |  | Y |   |  |  |  |      | TRUE |
| CL8565Contig1 | CL8565Contig1 |  | Y |   |  |  |  |      | TRUE |
| CL8587Contig2 | CL8587Contig2 |  | Y |   |  |  |  |      | TRUE |
| CL8606Contig1 | CL8606Contig1 |  | Y |   |  |  |  |      | TRUE |
| CL8625Contig1 | CL8625Contig1 |  | Y |   |  |  |  |      | TRUE |
| CL8672Contig1 | CL8672Contig1 |  | Y |   |  |  |  |      | TRUE |
| CL8729Contig1 | CL8729Contig1 |  | Y |   |  |  |  |      | TRUE |
| CL8749Contig2 | CL8749Contig2 |  | Y |   |  |  |  |      | TRUE |
| CL8769Contig1 | CL8769Contig1 |  | Y |   |  |  |  |      | TRUE |
| CL8785Contig2 | CL8785Contig2 |  | Y |   |  |  |  |      | TRUE |
| CL887Contig3  | CL887Contig3  |  | Y |   |  |  |  |      | TRUE |
| CL89Contig1   | CL89Contig1   |  | Y |   |  |  |  |      | TRUE |
| CL9010Contig1 | CL9010Contig1 |  | Y |   |  |  |  |      | TRUE |
| CL9091Contig2 | CL9091Contig2 |  | Y |   |  |  |  |      | TRUE |
| CL90Contig6   | CL90Contig6   |  | Y |   |  |  |  |      | TRUE |
| CL9129Contig1 | CL9129Contig1 |  | Y |   |  |  |  |      | TRUE |
| CL9153Contig1 | CL9153Contig1 |  | Y |   |  |  |  |      | TRUE |

|                           |                                                                                                                   |          |   |   |   |   |  |      |      |
|---------------------------|-------------------------------------------------------------------------------------------------------------------|----------|---|---|---|---|--|------|------|
| CL9187Contig1             | CL9187Contig1                                                                                                     |          | Y |   |   |   |  |      | TRUE |
| CL9204Contig1             | CL9204Contig1                                                                                                     |          | Y |   |   |   |  |      | TRUE |
| CL9213Contig2             | CL9213Contig2                                                                                                     |          | Y |   |   |   |  |      | TRUE |
| CL9216Contig2             | CL9216Contig2                                                                                                     |          | Y |   |   |   |  |      | TRUE |
| CL921Contig2              | CL921Contig2                                                                                                      |          | Y |   |   |   |  |      | TRUE |
| CL9235Contig3             | CL9235Contig3                                                                                                     |          | Y |   |   |   |  |      | TRUE |
| CL9347Contig1             | CL9347Contig1                                                                                                     |          | Y |   |   |   |  |      | TRUE |
| CL9389Contig1             | CL9389Contig1                                                                                                     |          | Y |   |   |   |  |      | TRUE |
| CL9403Contig1             | CL9403Contig1                                                                                                     |          | Y |   |   |   |  |      | TRUE |
| CL9406Contig2             | CL9406Contig2                                                                                                     |          | Y |   |   |   |  |      | TRUE |
| CL9423Contig1             | CL9423Contig1                                                                                                     |          | Y |   |   |   |  |      | TRUE |
| CL9436Contig1             | CL9436Contig1                                                                                                     |          | Y |   |   |   |  |      | TRUE |
| CL9481Contig1             | CL9481Contig1                                                                                                     |          | Y |   |   |   |  |      | TRUE |
| CL9501Contig1             | CL9501Contig1                                                                                                     |          | Y |   |   |   |  |      | TRUE |
| CL9522Contig1             | CL9522Contig1                                                                                                     |          | Y |   |   |   |  |      | TRUE |
| CL952Contig1              | CL952Contig1                                                                                                      |          | Y |   |   |   |  |      | TRUE |
| CL956Contig3              | CL956Contig3                                                                                                      |          | Y |   |   |   |  |      | TRUE |
| CL9618Contig1             | CL9618Contig1                                                                                                     |          | Y |   |   |   |  |      | TRUE |
| CL962Contig1;Q4V7W4       | CL962Contig1                                                                                                      |          | Y | Y |   |   |  | TRUE | TRUE |
| CL9635Contig1             | CL9635Contig1                                                                                                     |          | Y |   |   |   |  |      | TRUE |
| CL964Contig2              | CL964Contig2                                                                                                      |          | Y |   |   |   |  |      | TRUE |
| CL966Contig1              | CL966Contig1                                                                                                      |          | Y |   |   |   |  |      | TRUE |
| CL9699Contig1             | CL9699Contig1                                                                                                     |          | Y |   |   |   |  |      | TRUE |
| CL971Contig9              | CL971Contig9                                                                                                      |          | Y |   |   |   |  |      | TRUE |
| CL975Contig6              | CL975Contig6                                                                                                      |          | Y |   |   |   |  |      | TRUE |
| CL9794Contig1             | CL9794Contig1                                                                                                     |          | Y |   |   |   |  |      | TRUE |
| CL979Contig6              | CL979Contig6                                                                                                      |          | Y |   |   |   |  |      | TRUE |
| CL9851Contig1             | CL9851Contig1                                                                                                     |          | Y |   |   |   |  |      | TRUE |
| CL990Contig2              | CL990Contig2                                                                                                      |          | Y |   |   |   |  |      | TRUE |
| CL998Contig3              | CL998Contig3                                                                                                      |          | Y |   |   |   |  |      | TRUE |
| CL9991Contig1             | CL9991Contig1                                                                                                     |          | Y |   |   |   |  |      | TRUE |
| CV075495 UniRef100_Q2V    | Rep: MGC131189 protein - Xenopus laevis (African clawed frog), partial (45%)                                      |          |   |   |   |   |  |      |      |
| CV523361 similar to UniRe | Rep: ATPase type 13A4 - Xenopus laevis (African clawed frog), partial (45%)                                       | atp13a4  |   |   | Y |   |  | TRUE | TRUE |
| CX133552 homologue to U   | Rep: Uncharacterized protein C21orf59                                                                             | c21orf59 |   |   | Y |   |  | TRUE | TRUE |
| CX133910                  | CX133910                                                                                                          |          |   |   |   |   |  |      |      |
| D0E8G8;CL3761Contig1      | Zinc finger protein 423 OS=Xenopus laevis (African clawed frog)                                                   | znf423   |   |   | Y |   |  | TRUE | TRUE |
| D0EUZ9                    | B-cell lymphoma 9 OS=Xenopus laevis (African clawed frog)                                                         | Bcl9     |   |   | Y |   |  | TRUE | TRUE |
| D0PPG1                    | Costal2 OS=Xenopus laevis (African clawed frog)                                                                   | Cos2     |   |   |   |   |  |      |      |
| D2CGM1                    | Fanconi anemia complementation group 1 OS=Xenopus laevis (African clawed frog)                                    | fanc1    |   |   | Y |   |  | TRUE | TRUE |
| D2DGW1                    | Cell division cycle associated 2 OS=Xenopus laevis (African clawed frog)                                          | cdca2    |   |   |   |   |  |      |      |
| D2WK21                    | Sex-determining region Y-box 2 OS=Xenopus laevis (African clawed frog)                                            | sox2     |   |   | Y |   |  | TRUE | TRUE |
| D3IUT5                    | Treslin OS=Xenopus laevis (African clawed frog)                                                                   | ticrr    |   |   |   |   |  |      |      |
| D3JCC3                    | Recombination activating protein 2 OS=Xenopus laevis (African clawed frog)                                        | rag2     |   |   |   |   |  |      |      |
| D5JEJ8                    | Afadin OS=Xenopus laevis (African clawed frog)                                                                    | milt4    |   |   |   | Y |  | TRUE | TRUE |
| D6C652                    | Yes-associated protein 65 OS=Xenopus laevis (African clawed frog)                                                 | yap      |   |   |   |   |  |      |      |
| D8WX02;CL4813Contig1      | Midline 1 OS=Xenopus laevis (African clawed frog)                                                                 | mid1     |   |   | Y |   |  | TRUE | TRUE |
| DC007851 similar to UniRe | Rep: C219-reactive peptide - Xenopus tropicalis, partial (12%)                                                    |          |   |   |   |   |  |      |      |
| DC014590 similar to UniRe | Rep: Chromosome 1 SCAF14998, whole genome shotgun sequence - Tetraodon nigroviridis (Green puffer), partial (94%) |          |   |   |   |   |  |      |      |
| DC024875 homologue to U   | Rep: Actin, alpha cardiac muscle 1 - Xenopus laevis (African clawed frog)                                         | actc1    |   | Y |   | Y |  | TRUE | TRUE |
| DC027108 homologue to U   | Rep: Protein jagunal homolog 1 - Xenopus laevis (African clawed frog)                                             | jagn1    |   |   |   | Y |  | TRUE | TRUE |
| DC034728 homologue to U   | Rep: Hdac6-prov protein - Xenopus laevis (African clawed frog)                                                    | hdac6    |   |   |   | Y |  | TRUE | TRUE |
| DC035338 homologue to U   | Rep: Interleukin enhancer binding factor 3 OS=Xenopus laevis (African clawed frog)                                | ilf3     |   |   |   | Y |  | TRUE | TRUE |
| DC042719 homologue to U   | Rep: Actin, cytoplasmic 1 - Xenopus laevis (African clawed frog)                                                  | actb     |   |   |   | Y |  | TRUE | TRUE |
| DC044722 similar to UniRe | Rep: CCDC95 protein - Bos taurus (Cattle)                                                                         | ccdc95   |   |   |   |   |  |      |      |
| DC047969 homologue to U   | Rep: Nucleoside diphosphate kinase 1 OS=Xenopus laevis (African clawed frog)                                      | nme      |   |   |   |   |  |      |      |
| DC049447 UniRef100_Q4V    | Rep: MGC115486 protein - Xenopus laevis (African clawed frog), partial (28%)                                      |          |   |   |   |   |  |      |      |
| DC050368 homologue to U   | Rep: Filamin-B (FLN-B) (Beta-filamin) OS=Xenopus laevis (African clawed frog)                                     | flnb     |   |   |   | Y |  | TRUE | TRUE |
| DC052197 homologue to U   | Rep: Mediator of RNA polymerase II subunit 30 OS=Xenopus laevis (African clawed frog)                             | med30    |   |   |   |   |  |      |      |
| DC053581 UniRef100_P45    | Rep: Y-box-binding protein 2-B - Xenopus laevis (African clawed frog)                                             | ybx2     |   |   |   | Y |  | TRUE | TRUE |
| DC053855 homologue to U   | Rep: MGC81281 protein - Xenopus laevis (African clawed frog), partial (34%)                                       |          |   |   |   |   |  |      |      |
| DC062871 homologue to U   | Rep: MGC52847 protein - Xenopus laevis (African clawed frog), partial (84%)                                       |          |   |   |   |   |  |      |      |
| DC064308 homologue to U   | Rep: LOC495134 protein - Xenopus laevis (African clawed frog), partial (77%)                                      |          |   |   |   |   |  |      |      |
| DR717088 homologue to U   | Rep: AT-rich interactive domain-containing protein 1 OS=Xenopus laevis (African clawed frog)                      | brg1     |   |   |   |   |  |      |      |
| DR720131 homologue to U   | Rep: MGC64332 protein - Xenopus laevis (African clawed frog), partial (45%)                                       |          |   | Y |   |   |  | TRUE | TRUE |
| DR728022 homologue to U   | Rep: Guanidinoacetate N-methyltransferase OS=Xenopus laevis (African clawed frog)                                 | gamtb    |   |   |   |   |  |      |      |
| dsrrswapns_comp116804     | len=382                                                                                                           |          |   |   |   |   |  |      |      |
| dsrrswapns_comp119549     | len=256                                                                                                           |          |   |   |   |   |  |      |      |
| dsrrswapns_comp11994_c    | len=224                                                                                                           |          |   |   |   |   |  |      |      |
| dsrrswapns_comp120180     | len=262                                                                                                           |          |   |   |   |   |  |      |      |
| dsrrswapns_comp132298     | len=219                                                                                                           |          |   |   |   |   |  |      |      |
| dsrrswapns_comp141446     | len=239                                                                                                           |          |   |   |   |   |  |      |      |
| dsrrswapns_comp142531     | len=331                                                                                                           |          |   |   |   |   |  |      |      |
| dsrrswapns_comp1430289    | len=213                                                                                                           |          |   |   |   |   |  |      |      |
| dsrrswapns_comp145349     | len=620                                                                                                           |          |   |   |   |   |  |      |      |
| dsrrswapns_comp150331     | len=435                                                                                                           |          |   |   |   |   |  |      |      |
| dsrrswapns_comp152388     | len=240                                                                                                           |          |   |   |   |   |  |      |      |
| dsrrswapns_comp155943     | len=235                                                                                                           |          |   |   |   |   |  |      |      |
| dsrrswapns_comp161044     | len=992                                                                                                           |          |   |   |   |   |  |      |      |
| dsrrswapns_comp1629_c0    | len=224                                                                                                           |          |   |   |   |   |  |      |      |
| dsrrswapns_comp165014     | len=380                                                                                                           |          |   |   |   |   |  |      |      |
| dsrrswapns_comp171813     | len=511                                                                                                           |          |   |   |   |   |  |      |      |
| dsrrswapns_comp173395     | len=530                                                                                                           |          |   |   |   |   |  |      |      |
| dsrrswapns_comp174611     | len=218                                                                                                           |          |   |   |   |   |  |      |      |
| dsrrswapns_comp181463     | len=389                                                                                                           |          |   |   |   |   |  |      |      |
| dsrrswapns_comp182460     | len=504                                                                                                           |          |   |   |   |   |  |      |      |
| dsrrswapns_comp185310     | len=909                                                                                                           |          |   |   |   |   |  |      |      |

|                       |          |  |  |  |  |  |  |  |  |
|-----------------------|----------|--|--|--|--|--|--|--|--|
| dsrrswapns_comp186193 | len=201  |  |  |  |  |  |  |  |  |
| dsrrswapns_comp187668 | len=277  |  |  |  |  |  |  |  |  |
| dsrrswapns_comp187699 | len=281  |  |  |  |  |  |  |  |  |
| dsrrswapns_comp187784 | len=329  |  |  |  |  |  |  |  |  |
| dsrrswapns_comp188169 | len=2289 |  |  |  |  |  |  |  |  |
| dsrrswapns_comp189454 | len=340  |  |  |  |  |  |  |  |  |
| dsrrswapns_comp189792 | len=1253 |  |  |  |  |  |  |  |  |
| dsrrswapns_comp191560 | len=1371 |  |  |  |  |  |  |  |  |
| dsrrswapns_comp192152 | len=453  |  |  |  |  |  |  |  |  |
| dsrrswapns_comp193427 | len=532  |  |  |  |  |  |  |  |  |
| dsrrswapns_comp193683 | len=349  |  |  |  |  |  |  |  |  |
| dsrrswapns_comp194741 | len=959  |  |  |  |  |  |  |  |  |
| dsrrswapns_comp195565 | len=284  |  |  |  |  |  |  |  |  |
| dsrrswapns_comp195977 | len=790  |  |  |  |  |  |  |  |  |
| dsrrswapns_comp196070 | len=725  |  |  |  |  |  |  |  |  |
| dsrrswapns_comp196386 | len=2839 |  |  |  |  |  |  |  |  |
| dsrrswapns_comp196398 | len=1229 |  |  |  |  |  |  |  |  |
| dsrrswapns_comp197002 | len=449  |  |  |  |  |  |  |  |  |
| dsrrswapns_comp197215 | len=1652 |  |  |  |  |  |  |  |  |
| dsrrswapns_comp198030 | len=1959 |  |  |  |  |  |  |  |  |
| dsrrswapns_comp198435 | len=239  |  |  |  |  |  |  |  |  |
| dsrrswapns_comp199260 | len=303  |  |  |  |  |  |  |  |  |
| dsrrswapns_comp199899 | len=286  |  |  |  |  |  |  |  |  |
| dsrrswapns_comp200100 | len=479  |  |  |  |  |  |  |  |  |
| dsrrswapns_comp200116 | len=328  |  |  |  |  |  |  |  |  |
| dsrrswapns_comp200264 | len=934  |  |  |  |  |  |  |  |  |
| dsrrswapns_comp200563 | len=269  |  |  |  |  |  |  |  |  |
| dsrrswapns_comp200702 | len=555  |  |  |  |  |  |  |  |  |
| dsrrswapns_comp200710 | len=249  |  |  |  |  |  |  |  |  |
| dsrrswapns_comp201613 | len=294  |  |  |  |  |  |  |  |  |
| dsrrswapns_comp203070 | len=343  |  |  |  |  |  |  |  |  |
| dsrrswapns_comp203196 | len=642  |  |  |  |  |  |  |  |  |
| dsrrswapns_comp203321 | len=469  |  |  |  |  |  |  |  |  |
| dsrrswapns_comp203662 | len=998  |  |  |  |  |  |  |  |  |
| dsrrswapns_comp204377 | len=847  |  |  |  |  |  |  |  |  |
| dsrrswapns_comp204498 | len=254  |  |  |  |  |  |  |  |  |
| dsrrswapns_comp204545 | len=810  |  |  |  |  |  |  |  |  |
| dsrrswapns_comp204624 | len=455  |  |  |  |  |  |  |  |  |
| dsrrswapns_comp205246 | len=1846 |  |  |  |  |  |  |  |  |
| dsrrswapns_comp205782 | len=975  |  |  |  |  |  |  |  |  |
| dsrrswapns_comp205895 | len=1850 |  |  |  |  |  |  |  |  |
| dsrrswapns_comp205971 | len=2542 |  |  |  |  |  |  |  |  |
| dsrrswapns_comp206112 | len=1124 |  |  |  |  |  |  |  |  |
| dsrrswapns_comp206214 | len=731  |  |  |  |  |  |  |  |  |
| dsrrswapns_comp207056 | len=733  |  |  |  |  |  |  |  |  |
| dsrrswapns_comp207165 | len=1567 |  |  |  |  |  |  |  |  |
| dsrrswapns_comp207281 | len=1418 |  |  |  |  |  |  |  |  |
| dsrrswapns_comp207336 | len=601  |  |  |  |  |  |  |  |  |
| dsrrswapns_comp207653 | len=1286 |  |  |  |  |  |  |  |  |
| dsrrswapns_comp207672 | len=3710 |  |  |  |  |  |  |  |  |
| dsrrswapns_comp207775 | len=557  |  |  |  |  |  |  |  |  |
| dsrrswapns_comp207902 | len=6129 |  |  |  |  |  |  |  |  |
| dsrrswapns_comp207966 | len=2269 |  |  |  |  |  |  |  |  |
| dsrrswapns_comp208039 | len=1233 |  |  |  |  |  |  |  |  |
| dsrrswapns_comp208436 | len=712  |  |  |  |  |  |  |  |  |
| dsrrswapns_comp208608 | len=1653 |  |  |  |  |  |  |  |  |
| dsrrswapns_comp208635 | len=771  |  |  |  |  |  |  |  |  |
| dsrrswapns_comp208676 | len=1311 |  |  |  |  |  |  |  |  |
| dsrrswapns_comp208692 | len=520  |  |  |  |  |  |  |  |  |
| dsrrswapns_comp208799 | len=6400 |  |  |  |  |  |  |  |  |
| dsrrswapns_comp209340 | len=500  |  |  |  |  |  |  |  |  |
| dsrrswapns_comp209374 | len=1195 |  |  |  |  |  |  |  |  |
| dsrrswapns_comp209393 | len=911  |  |  |  |  |  |  |  |  |
| dsrrswapns_comp209408 | len=1062 |  |  |  |  |  |  |  |  |
| dsrrswapns_comp209417 | len=2504 |  |  |  |  |  |  |  |  |
| dsrrswapns_comp209464 | len=2027 |  |  |  |  |  |  |  |  |
| dsrrswapns_comp209500 | len=1654 |  |  |  |  |  |  |  |  |
| dsrrswapns_comp209695 | len=840  |  |  |  |  |  |  |  |  |
| dsrrswapns_comp209806 | len=893  |  |  |  |  |  |  |  |  |
| dsrrswapns_comp209900 | len=1568 |  |  |  |  |  |  |  |  |
| dsrrswapns_comp210042 | len=1469 |  |  |  |  |  |  |  |  |
| dsrrswapns_comp210199 | len=1347 |  |  |  |  |  |  |  |  |
| dsrrswapns_comp210361 | len=2571 |  |  |  |  |  |  |  |  |
| dsrrswapns_comp210557 | len=1322 |  |  |  |  |  |  |  |  |
| dsrrswapns_comp210667 | len=1119 |  |  |  |  |  |  |  |  |
| dsrrswapns_comp211056 | len=1398 |  |  |  |  |  |  |  |  |
| dsrrswapns_comp211061 | len=3565 |  |  |  |  |  |  |  |  |
| dsrrswapns_comp211238 | len=1138 |  |  |  |  |  |  |  |  |
| dsrrswapns_comp211245 | len=2036 |  |  |  |  |  |  |  |  |
| dsrrswapns_comp211248 | len=978  |  |  |  |  |  |  |  |  |
| dsrrswapns_comp211320 | len=1766 |  |  |  |  |  |  |  |  |
| dsrrswapns_comp211447 | len=2210 |  |  |  |  |  |  |  |  |
| dsrrswapns_comp211492 | len=2429 |  |  |  |  |  |  |  |  |
| dsrrswapns_comp211572 | len=892  |  |  |  |  |  |  |  |  |
| dsrrswapns_comp211626 | len=725  |  |  |  |  |  |  |  |  |
| dsrrswapns_comp211746 | len=685  |  |  |  |  |  |  |  |  |

|                        |           |  |  |   |  |  |  |      |      |
|------------------------|-----------|--|--|---|--|--|--|------|------|
| dsrrswapns_comp212436  | len=421   |  |  |   |  |  |  |      |      |
| dsrrswapns_comp212502  | len=1736  |  |  |   |  |  |  |      |      |
| dsrrswapns_comp212594  | len=1253  |  |  |   |  |  |  |      |      |
| dsrrswapns_comp212612  | len=1311  |  |  |   |  |  |  |      |      |
| dsrrswapns_comp212624  | len=1012  |  |  |   |  |  |  |      |      |
| dsrrswapns_comp212669  | len=2527  |  |  |   |  |  |  |      |      |
| dsrrswapns_comp212852  | len=214   |  |  |   |  |  |  |      |      |
| dsrrswapns_comp212871  | len=1347  |  |  | Y |  |  |  | TRUE | TRUE |
| dsrrswapns_comp212910  | len=1878  |  |  |   |  |  |  |      |      |
| dsrrswapns_comp213002  | len=1628  |  |  |   |  |  |  |      |      |
| dsrrswapns_comp213192  | len=1658  |  |  |   |  |  |  |      |      |
| dsrrswapns_comp213204  | len=2341  |  |  |   |  |  |  |      |      |
| dsrrswapns_comp213316  | len=2272  |  |  |   |  |  |  |      |      |
| dsrrswapns_comp213553  | len=1469  |  |  |   |  |  |  |      |      |
| dsrrswapns_comp213599  | len=5103  |  |  |   |  |  |  |      |      |
| dsrrswapns_comp21360_c | len=389   |  |  |   |  |  |  |      |      |
| dsrrswapns_comp213683  | len=1326  |  |  |   |  |  |  |      |      |
| dsrrswapns_comp213703  | len=760   |  |  |   |  |  |  |      |      |
| dsrrswapns_comp213713  | len=504   |  |  |   |  |  |  |      |      |
| dsrrswapns_comp213772  | len=814   |  |  |   |  |  |  |      |      |
| dsrrswapns_comp213784  | len=1442  |  |  |   |  |  |  |      |      |
| dsrrswapns_comp213817  | len=15316 |  |  |   |  |  |  |      |      |
| dsrrswapns_comp213847  | len=565   |  |  |   |  |  |  |      |      |
| dsrrswapns_comp213982  | len=3721  |  |  |   |  |  |  |      |      |
| dsrrswapns_comp214133  | len=1048  |  |  |   |  |  |  |      |      |
| dsrrswapns_comp214206  | len=3094  |  |  |   |  |  |  |      |      |
| dsrrswapns_comp214272  | len=3144  |  |  |   |  |  |  |      |      |
| dsrrswapns_comp214315  | len=2467  |  |  |   |  |  |  |      |      |
| dsrrswapns_comp214479  | len=3492  |  |  |   |  |  |  |      |      |
| dsrrswapns_comp214578  | len=1260  |  |  |   |  |  |  |      |      |
| dsrrswapns_comp214613  | len=3333  |  |  |   |  |  |  |      |      |
| dsrrswapns_comp214632  | len=496   |  |  |   |  |  |  |      |      |
| dsrrswapns_comp214637  | len=2041  |  |  |   |  |  |  |      |      |
| dsrrswapns_comp214667  | len=535   |  |  |   |  |  |  |      |      |
| dsrrswapns_comp214909  | len=5187  |  |  |   |  |  |  |      |      |
| dsrrswapns_comp215243  | len=467   |  |  |   |  |  |  |      |      |
| dsrrswapns_comp215263  | len=1750  |  |  |   |  |  |  |      |      |
| dsrrswapns_comp215320  | len=1042  |  |  |   |  |  |  |      |      |
| dsrrswapns_comp215363  | len=1552  |  |  |   |  |  |  |      |      |
| dsrrswapns_comp215388  | len=2200  |  |  |   |  |  |  |      |      |
| dsrrswapns_comp215407  | len=354   |  |  |   |  |  |  |      |      |
| dsrrswapns_comp215412  | len=2240  |  |  |   |  |  |  |      |      |
| dsrrswapns_comp215430  | len=990   |  |  |   |  |  |  |      |      |
| dsrrswapns_comp215471  | len=8484  |  |  |   |  |  |  |      |      |
| dsrrswapns_comp215656  | len=2897  |  |  |   |  |  |  |      |      |
| dsrrswapns_comp215727  | len=972   |  |  |   |  |  |  |      |      |
| dsrrswapns_comp215735  | len=2025  |  |  |   |  |  |  |      |      |
| dsrrswapns_comp215943  | len=2923  |  |  |   |  |  |  |      |      |
| dsrrswapns_comp215959  | len=646   |  |  |   |  |  |  |      |      |
| dsrrswapns_comp215985  | len=9979  |  |  |   |  |  |  |      |      |
| dsrrswapns_comp216004  | len=1698  |  |  |   |  |  |  |      |      |
| dsrrswapns_comp216030  | len=1289  |  |  |   |  |  |  |      |      |
| dsrrswapns_comp216043  | len=2424  |  |  |   |  |  |  |      |      |
| dsrrswapns_comp216092  | len=2393  |  |  |   |  |  |  |      |      |
| dsrrswapns_comp216121  | len=842   |  |  |   |  |  |  |      |      |
| dsrrswapns_comp216131  | len=593   |  |  |   |  |  |  |      |      |
| dsrrswapns_comp216167  | len=818   |  |  |   |  |  |  |      |      |
| dsrrswapns_comp216246  | len=3435  |  |  |   |  |  |  |      |      |
| dsrrswapns_comp216320  | len=333   |  |  |   |  |  |  |      |      |
| dsrrswapns_comp216335  | len=3354  |  |  |   |  |  |  |      |      |
| dsrrswapns_comp216350  | len=6139  |  |  |   |  |  |  |      |      |
| dsrrswapns_comp216492  | len=2704  |  |  |   |  |  |  |      |      |
| dsrrswapns_comp216523  | len=512   |  |  |   |  |  |  |      |      |
| dsrrswapns_comp216613  | len=4193  |  |  |   |  |  |  |      |      |
| dsrrswapns_comp216642  | len=3947  |  |  |   |  |  |  |      |      |
| dsrrswapns_comp216646  | len=3233  |  |  |   |  |  |  |      |      |
| dsrrswapns_comp216663  | len=3510  |  |  |   |  |  |  |      |      |
| dsrrswapns_comp216720  | len=1088  |  |  |   |  |  |  |      |      |
| dsrrswapns_comp216836  | len=3961  |  |  |   |  |  |  |      |      |
| dsrrswapns_comp216885  | len=15664 |  |  |   |  |  |  |      |      |
| dsrrswapns_comp216967  | len=3486  |  |  |   |  |  |  |      |      |
| dsrrswapns_comp216997  | len=3475  |  |  |   |  |  |  |      |      |
| dsrrswapns_comp217036  | len=682   |  |  |   |  |  |  |      |      |
| dsrrswapns_comp217115  | len=796   |  |  |   |  |  |  |      |      |
| dsrrswapns_comp217164  | len=2926  |  |  |   |  |  |  |      |      |
| dsrrswapns_comp217313  | len=2833  |  |  |   |  |  |  |      |      |
| dsrrswapns_comp217415  | len=3082  |  |  |   |  |  |  |      |      |
| dsrrswapns_comp217423  | len=1879  |  |  |   |  |  |  |      |      |
| dsrrswapns_comp217428  | len=5152  |  |  |   |  |  |  |      |      |
| dsrrswapns_comp217466  | len=4926  |  |  |   |  |  |  |      |      |
| dsrrswapns_comp217493  | len=523   |  |  |   |  |  |  |      |      |
| dsrrswapns_comp217589  | len=5068  |  |  |   |  |  |  |      |      |
| dsrrswapns_comp217626  | len=5041  |  |  |   |  |  |  |      |      |
| dsrrswapns_comp217697  | len=5729  |  |  |   |  |  |  |      |      |
| dsrrswapns_comp217916  | len=3739  |  |  |   |  |  |  |      |      |
| dsrrswapns_comp217955  | len=816   |  |  |   |  |  |  |      |      |

|                            |                                                                                 |            |   |  |   |   |   |  |      |      |
|----------------------------|---------------------------------------------------------------------------------|------------|---|--|---|---|---|--|------|------|
| dsrrswapns_comp217958      | len=15803                                                                       |            |   |  |   |   |   |  |      |      |
| dsrrswapns_comp253985      | len=510                                                                         |            |   |  |   |   |   |  |      |      |
| dsrrswapns_comp26597_c     | len=233                                                                         |            |   |  |   |   |   |  |      |      |
| dsrrswapns_comp41315_c     | len=209                                                                         |            | Y |  |   |   |   |  | TRUE | TRUE |
| dsrrswapns_comp482840      | len=431                                                                         |            |   |  |   |   |   |  |      |      |
| dsrrswapns_comp50253_c     | len=235                                                                         |            |   |  |   |   |   |  |      |      |
| dsrrswapns_comp678307      | len=458                                                                         |            |   |  |   |   |   |  |      |      |
| dsrrswapns_comp93611_c     | len=445                                                                         |            |   |  |   |   |   |  |      |      |
| dsrrswapns_comp995798      | len=340                                                                         |            |   |  |   |   |   |  |      |      |
| DT058091                   | DT058091                                                                        |            |   |  |   |   |   |  |      |      |
| DT076135 homologue to U    | Rep: Selenophosphate synthetase 2                                               | sephs2     |   |  |   | Y |   |  | TRUE | TRUE |
| DT080194 similar to UniRe  | Rep: 6-phosphofructo-2-kinase/fruct                                             | pkfbf1     |   |  |   | Y |   |  | TRUE | TRUE |
| DY572351                   | DY572351                                                                        |            |   |  |   |   |   |  |      |      |
| E3URQ0:CL3362Contig2       | Haspin OS=Xenopus laevis PE=2 S                                                 | gsg2       |   |  |   |   |   |  |      |      |
| E5LG93                     | Centrosomal protein OS=Xenopus laevis                                           | cep192     |   |  |   | Y |   |  | TRUE | TRUE |
| E7DCM0                     | Mogs (Fragment) OS=Xenopus laevis                                               | mogs       |   |  |   | Y |   |  | TRUE | TRUE |
| E7FLL0                     | CST complex subunit CTC1 OS=Xenopus laevis                                      | ctc1       |   |  |   | Y |   |  | TRUE | TRUE |
| EB462740 similar to UniRe  | Rep: Uncharacterized protein C2orf55                                            | c2orf55    |   |  |   |   |   |  |      |      |
| EB465665 weakly similar to | Rep: Keratin, type II cytoskeletal 75                                           | krt75      |   |  |   |   |   |  |      |      |
| EB470951 UniRef100_A8E     | Rep: Alpha-tubulin - Giardia lamblia                                            | tuba       |   |  |   |   |   |  |      |      |
| EB473635 homologue to U    | Rep: Heat shock protein 70 - Sphaeria                                           | hsp70      |   |  |   |   |   |  |      |      |
| EB474857 similar to UniRe  | Rep: Long palate, lung and nasal epithelium                                     | C20orf186  |   |  |   |   |   |  |      |      |
| EB475574 weakly similar to | Rep: AGAP003346-PA - Anopheles gambiae str. PEST, partial (10%)                 |            |   |  |   |   |   |  |      |      |
| EB477604 homologue to U    | Rep: thymidylate kinase family LPS                                              | cmpk2      |   |  |   | Y |   |  | TRUE | TRUE |
| EB478098 similar to UniRe  | Rep: uromodulin-like 1 isoform 1 - Xenopus laevis                               | umodl1     |   |  |   |   |   |  |      |      |
| EB644224 homologue to U    | Rep: MGC108424 protein - Xenopus laevis                                         | MGC108424  |   |  |   |   |   |  |      |      |
| EG574474 similar to UniRe  | Rep: Mitochondrial substrate carrier - Chlamydomonas reinhardtii, partial (21%) |            |   |  |   |   |   |  |      |      |
| EG584025 weakly similar to | Rep: Cathepsin E precursor - Rana temporaria                                    | ctse       |   |  |   |   |   |  |      |      |
| F6KDD5                     | NADH dehydrogenase subunit 1 OS=Xenopus laevis                                  | nad1       |   |  |   |   |   |  |      |      |
| F7IYU6                     | Calcium activated chloride channel                                              | clca6      |   |  |   |   |   |  |      |      |
| G1ESZ8                     | Putative beta-N-acetylhexosaminidase                                            | bglx       |   |  |   |   |   |  |      |      |
| G3CQZ6                     | M18BP1 isoform 1 OS=Xenopus laevis                                              | m18bp1     |   |  |   |   |   |  |      |      |
| G3GBS3;CL10123Contig1      | Peroxioredoxin 2 OS=Xenopus laevis                                              | prdx2      | Y |  | Y |   |   |  | TRUE | TRUE |
| G3GBS4                     | Peroxioredoxin 3 OS=Xenopus laevis                                              | prdx3      |   |  | Y |   |   |  | TRUE | TRUE |
| G8HXD7                     | Wnt-activated inhibitory factor 1a.2                                            | wif1       |   |  | Y |   |   |  | TRUE | TRUE |
| H2DQ55                     | Interferon-gamma (Fragment) OS=Xenopus laevis                                   | ifng       |   |  |   |   |   |  |      |      |
| H9B3Z0                     | Bromodomain adjacent to zinc finger domain 1                                    | Baz2b      |   |  | Y |   |   |  | TRUE | TRUE |
| H9DRN9                     | Oculocerebrorenal syndrome of Lowe                                              | ocrl       |   |  | Y |   |   |  | TRUE | TRUE |
| I3PB85;CL26Contig14        | IFN-gamma-inducible-lysosomal thi                                               | gilt       |   |  |   |   |   |  |      |      |
| NP9453667 GB               | AY819241.1 AAX37552.1 c-myc                                                     |            |   |  |   |   |   |  |      |      |
| O12975;CL1627Contig2       | Fructose-bisphosphate aldolase OS=Xenopus laevis                                | aldoa      | Y |  | Y |   | Y |  | TRUE | TRUE |
| O13027                     | Mitotic phosphoprotein 90 OS=Xenopus laevis                                     | epn2       |   |  |   |   |   |  |      |      |
| O13097;CL3156Contig1       | Ephrin-B1 OS=Xenopus laevis GN=                                                 | efnb1      |   |  | Y |   | Y |  | TRUE | TRUE |
| O13124;CL7992Contig1       | Vitamin D3 receptor OS=Xenopus laevis                                           | vdr        |   |  | Y |   |   |  | TRUE | TRUE |
| O42193;CL1Contig277        | MGC64314 protein OS=Xenopus laevis                                              | ranbp1     |   |  | Y |   |   |  | TRUE | TRUE |
| O42469                     | Transducin-like enhancer protein 1                                              | esg1       |   |  |   |   |   |  |      |      |
| O42507                     | Thrombospondin-3 (Fragment) OS=Xenopus laevis                                   | thbs3      |   |  |   |   |   |  |      |      |
| O42587;CL492Contig6        | 26S protease regulatory subunit 6A                                              | psmc3      |   |  | Y |   |   |  | TRUE | TRUE |
| O57345                     | Synaptobrevin OS=Xenopus laevis                                                 | vamp2      |   |  |   |   |   |  |      |      |
| O57468;CL1665Contig1       | 14-3-3 protein epsilon OS=Xenopus laevis                                        | ywhae      |   |  | Y |   |   |  | TRUE | TRUE |
| O57526                     | Insulin-like growth factor 2 mRNA-b                                             | igf2bp3    |   |  | Y |   |   |  | TRUE | TRUE |
| O73614                     | TAB1 OS=Xenopus laevis GN=tab1                                                  | tab1       |   |  | Y |   |   |  | TRUE | TRUE |
| O73633                     | Neural cell adhesion molecule OS=Xenopus laevis                                 | ncam1      |   |  | Y |   |   |  | TRUE | TRUE |
| O73676                     | Lens specific OS=Xenopus laevis PE=2 SV=1 - [O73676_XENLA]                      |            |   |  |   |   |   |  |      |      |
| O73732                     | Rho-associated kinase alpha OS=Xenopus laevis                                   | rock2      |   |  |   | Y |   |  | TRUE | TRUE |
| O93235                     | Cold-inducible RNA-binding protein                                              | cirbp      |   |  |   | Y |   |  | TRUE | TRUE |
| O93308                     | Structural maintenance of chromosomes 1                                         | smc1a      |   |  |   | Y |   |  | TRUE | TRUE |
| O93400;CL3Contig45         | Actin, cytoplasmic 1 OS=Xenopus laevis                                          | actb       |   |  | Y |   |   |  | TRUE | TRUE |
| O93477                     | Adenosylhomocysteinase B OS=Xenopus laevis                                      | ahcy2      |   |  | Y |   |   |  | TRUE | TRUE |
| O93522;CL47Contig4         | Nonmuscle myosin II heavy chain A                                               | myh9       |   |  | Y |   |   |  | TRUE | TRUE |
| P02281;TC453026 UniRef     | Histone H2B 1.1 OS=Xenopus laevis                                               | h2b11      |   |  |   |   |   |  |      |      |
| P02350                     | 40S ribosomal protein S3-A OS=Xenopus laevis                                    | rps3       | Y |  | Y |   |   |  | TRUE | TRUE |
| P02362                     | 40S ribosomal protein S7 OS=Xenopus laevis                                      | rps7       | Y |  | Y |   |   |  | TRUE | TRUE |
| P04751;CL3Contig43         | Actin, alpha cardiac muscle 1 OS=Xenopus laevis                                 | actc1      | Y |  | Y |   |   |  | TRUE | TRUE |
| P05221;CL36471Contig1      | Nucleoplasmin OS=Xenopus laevis                                                 | nupl       |   |  |   |   |   |  |      |      |
| P05377                     | Acetylcholine receptor subunit alpha 5                                          | chrna1b    |   |  |   |   |   |  |      |      |
| P08429;CL92Contig5         | 60S ribosomal protein L4-A OS=Xenopus laevis                                    | rpl4       | Y |  |   |   |   |  | TRUE | TRUE |
| P08478;CL660Contig2        | Peptidyl-glycine alpha-amidating mod                                            | pama       |   |  |   |   |   |  |      |      |
| P08537                     | Tubulin alpha chain OS=Xenopus laevis                                           | tuba       |   |  |   |   |   |  |      |      |
| P08759;CL504Contig3        | Serum albumin A OS=Xenopus laevis                                               | alb-a      |   |  |   |   |   |  |      |      |
| P09897                     | 60S ribosomal protein L18-A OS=Xenopus laevis                                   | rpl18a     |   |  | Y |   |   |  | TRUE | TRUE |
| P13549;CL5Contig29         | Elongation factor 1-alpha, somatic form                                         | eef1as     |   |  |   |   |   |  |      |      |
| P13926                     | Superoxide dismutase [Cu-Zn] A OS=Xenopus laevis                                | sod1       |   |  | Y |   |   |  | TRUE | TRUE |
| P15107;CL10172Contig1      | Superoxide dismutase [Cu-Zn] B OS=Xenopus laevis                                | sod1       | Y |  | Y |   |   |  | TRUE | TRUE |
| P15126                     | 60S ribosomal protein L5-B OS=Xenopus laevis                                    | rpl5b      |   |  |   |   |   |  |      |      |
| P17507                     | Elongation factor 1-alpha, oocyte form                                          | eef1ao     |   |  |   |   |   |  |      |      |
| P17508;CL430Contig6        | Elongation factor 1-alpha, oocyte form                                          | eef1a3     | Y |  |   |   |   |  | TRUE | TRUE |
| P18709                     | Vitellogenin-A2 OS=Xenopus laevis                                               | vtga2      |   |  | Y |   |   |  | TRUE | TRUE |
| P18716                     | Gastrula zinc finger protein XICGF2                                             | C101883812 |   |  |   |   |   |  |      |      |
| P18748                     | Oocyte zinc finger protein XICOF29                                              | xicof29    |   |  |   |   |   |  |      |      |
| P19011                     | Vitellogenin-B2 (Fragment) OS=Xenopus laevis                                    | vtgb2      |   |  |   |   |   |  |      |      |
| P19102                     | Protein c-ets-2-A OS=Xenopus laevis                                             | ets2       |   |  | Y |   |   |  | TRUE | TRUE |
| P20310                     | Neural cadherin-1 OS=Xenopus laevis                                             | cdh1       | Y |  | Y |   | Y |  | TRUE | TRUE |
| P20342                     | 40S ribosomal protein S15 OS=Xenopus laevis                                     | rps15      | Y |  | Y |   |   |  | TRUE | TRUE |
| P21574                     | Y-box-binding protein 2-A OS=Xenopus laevis                                     | ybx2       |   |  | Y |   |   |  | TRUE | TRUE |
| P23403;CL22Contig8         | 40S ribosomal protein S20 OS=Xenopus laevis                                     | rps20      |   |  | Y |   |   |  | TRUE | TRUE |

|                        |                                                                             |              |  |  |   |   |  |   |      |      |
|------------------------|-----------------------------------------------------------------------------|--------------|--|--|---|---|--|---|------|------|
| P23790                 | Serum response factor OS=Xenopus laevis                                     | srf          |  |  |   | Y |  |   | TRUE | TRUE |
| P24033                 | Cyclin-dependent kinase 1-B OS=Xenopus laevis                               | cdk1         |  |  |   | Y |  |   | TRUE | TRUE |
| P24495;CL4026Contig1   | Proteasome subunit alpha type-2 OS=Xenopus laevis                           | psma2        |  |  |   |   |  |   |      |      |
| P26363                 | Cystic fibrosis transmembrane conductance regulator OS=Xenopus laevis       | cfr          |  |  |   | Y |  |   | TRUE | TRUE |
| P26642                 | Elongation factor 1-gamma-A OS=Xenopus laevis                               | eef1ga       |  |  | Y |   |  |   | TRUE | TRUE |
| P28024                 | Proteasome subunit beta type-4 (Fragment) OS=Xenopus laevis                 | psmb4        |  |  |   | Y |  |   | TRUE | TRUE |
| P28048                 | Lupus La protein homolog A OS=Xenopus laevis                                | ssb          |  |  |   |   |  |   |      |      |
| P29540;CL66Contig1     | General transcription factor IIE subunit OS=Xenopus laevis                  | gtf2e2       |  |  |   |   |  |   |      |      |
| P30311                 | M-phase inducer phosphatase 3 OS=Xenopus laevis                             | cdc25c       |  |  |   | Y |  |   | TRUE | TRUE |
| P30883;CL57Contig6     | Tubulin beta-4 chain OS=Xenopus laevis                                      | tubb4        |  |  |   | Y |  |   | TRUE | TRUE |
| P30944                 | Cadherin-1 OS=Xenopus laevis                                                | cdh1         |  |  |   | Y |  |   | TRUE | TRUE |
| P30998;CL24Contig14    | Junction plakoglobin OS=Xenopus laevis                                      | jup          |  |  |   | Y |  |   | TRUE | TRUE |
| P39017;CL2323Contig1   | 40S ribosomal protein S6 OS=Xenopus laevis                                  | rps6         |  |  | Y |   |  |   | TRUE | TRUE |
| P40650                 | Transcription factor Sox-11-B OS=Xenopus laevis                             | sox11        |  |  |   | Y |  |   | TRUE | TRUE |
| P41116;CL818Contig6    | 60S ribosomal protein L8 OS=Xenopus laevis                                  | rpl8         |  |  | Y |   |  |   | TRUE | TRUE |
| P42291                 | D(1C) dopamine receptor OS=Xenopus laevis                                   | drd1c        |  |  |   |   |  |   |      |      |
| P43695                 | GATA-binding factor 5-A OS=Xenopus laevis                                   | gata5        |  |  |   | Y |  |   | TRUE | TRUE |
| P45441                 | Y-box-binding protein 2-B OS=Xenopus laevis                                 | ybx2         |  |  |   | Y |  |   | TRUE | TRUE |
| P45593                 | Cofilin-1-B OS=Xenopus laevis                                               | cof1         |  |  |   | Y |  |   | TRUE | TRUE |
| P45695                 | Cofilin-1-A OS=Xenopus laevis                                               | cof1         |  |  |   | Y |  |   | TRUE | TRUE |
| P46472;CL5541Contig2   | 26S protease regulatory subunit 7 C OS=Xenopus laevis                       | psmc2        |  |  |   | Y |  |   | TRUE | TRUE |
| P47835                 | 40S ribosomal protein S3-B OS=Xenopus laevis                                | rps3         |  |  |   | Y |  |   | TRUE | TRUE |
| P47904;CL48Contig2     | 40S ribosomal protein S27 OS=Xenopus laevis                                 | rps27        |  |  |   | Y |  |   | TRUE | TRUE |
| P48676                 | Peripherin OS=Xenopus laevis                                                | prph         |  |  |   | Y |  |   | TRUE | TRUE |
| P49393;CL1Contig728    | 40S ribosomal protein S13 OS=Xenopus laevis                                 | rps13        |  |  | Y |   |  |   | TRUE | TRUE |
| P49401;CL397Contig5    | 40S ribosomal protein S4 OS=Xenopus laevis                                  | rps4         |  |  |   |   |  |   |      |      |
| P50143;CL5141Contig1   | T-complex protein 1 subunit gamma OS=Xenopus laevis                         | cct3         |  |  | Y | Y |  |   | TRUE | TRUE |
| P50886                 | 60S ribosomal protein L22 OS=Xenopus laevis                                 | rpl22        |  |  | Y |   |  |   | TRUE | TRUE |
| P51048                 | Melatonin receptor type 1A X2.0 (Fragment) OS=Xenopus laevis                | mtra1        |  |  |   |   |  |   |      |      |
| P51644;CL1057Contig4   | ADP-ribosylation factor 4 OS=Xenopus laevis                                 | arf4         |  |  |   | Y |  |   | TRUE | TRUE |
| P51893                 | Adenosylhomocysteinase A OS=Xenopus laevis                                  | ahcy1        |  |  |   | Y |  |   | TRUE | TRUE |
| P52170                 | Importin subunit alpha-5 OS=Xenopus laevis                                  | kpna1        |  |  |   | Y |  |   | TRUE | TRUE |
| P52171                 | Importin subunit alpha-2 OS=Xenopus laevis                                  | kpna2        |  |  |   | Y |  |   | TRUE | TRUE |
| P52301;CL872Contig1    | GTP-binding nuclear protein Ran OS=Xenopus laevis                           | ran          |  |  |   |   |  |   |      |      |
| P54824                 | ATP-dependent RNA helicase ddx6 OS=Xenopus laevis                           | ddx6         |  |  |   | Y |  |   | TRUE | TRUE |
| P55861                 | DNA replication licensing factor mcm2 OS=Xenopus laevis                     | mcm2         |  |  |   | Y |  |   | TRUE | TRUE |
| P55863                 | Transcription factor Sox-3-A OS=Xenopus laevis                              | sox3         |  |  |   | Y |  |   | TRUE | TRUE |
| P62155;CL1Contig1497   | Calmodulin OS=Xenopus laevis                                                | calm1        |  |  | Y | Y |  |   | TRUE | TRUE |
| P62799                 | Histone H4 OS=Xenopus laevis                                                | hist4        |  |  |   |   |  |   |      |      |
| P62840                 | Ubiquitin-conjugating enzyme E2 D2 OS=Xenopus laevis                        | ube2d2       |  |  |   |   |  |   |      |      |
| P70010                 | Nucleoside diphosphate kinase A1 OS=Xenopus laevis                          | ndka1        |  |  | Y |   |  |   | TRUE | TRUE |
| P70011;CL60Contig6     | Nucleoside diphosphate kinase A2 OS=Xenopus laevis                          | ndka2        |  |  |   |   |  |   |      |      |
| P70032                 | Serine/threonine-protein kinase PLK1 OS=Xenopus laevis                      | plk1         |  |  |   | Y |  |   | TRUE | TRUE |
| P70039;CL1426Contig1   | Adenomatous polyposis coli homolog OS=Xenopus laevis                        | apc          |  |  |   | Y |  | Y | TRUE | TRUE |
| P70047;CL2Contig68     | Myelin transcription factor 1 OS=Xenopus laevis                             | myt1         |  |  |   | Y |  |   | TRUE | TRUE |
| P70049                 | Origin recognition complex protein 1 OS=Xenopus laevis                      | orc1         |  |  |   | Y |  |   | TRUE | TRUE |
| P70064                 | Transcription factor 7-like 1-D OS=Xenopus laevis                           | tcf7l1       |  |  |   | Y |  |   | TRUE | TRUE |
| P79929;CL1Contig361    | LOC397932 protein OS=Xenopus laevis GN=LOC397932 PE=2 SV=2 - (P79929_XENLA) |              |  |  |   |   |  |   |      |      |
| P79931                 | Pyruvate dehydrogenase E1-beta subunit OS=Xenopus laevis                    | pdhe1b1      |  |  |   |   |  |   |      |      |
| P79932                 | Pyruvate dehydrogenase E1-beta subunit OS=Xenopus laevis                    | pdhe1b2      |  |  |   |   |  |   |      |      |
| P79937                 | Homeobox protein Meis1 OS=Xenopus laevis                                    | meis1        |  |  |   | Y |  |   | TRUE | TRUE |
| P79951                 | CD3gamma/delta OS=Xenopus laevis                                            | cd3g         |  |  |   |   |  |   |      |      |
| Q00387;CL13623Contig1  | Serine protease inhibitor A6 OS=Xenopus laevis                              | serpina6     |  |  | Y |   |  |   | TRUE | TRUE |
| Q01550                 | Tanabin OS=Xenopus laevis                                                   | aoc2         |  |  |   |   |  |   |      |      |
| Q01611                 | Zinc finger Y-chromosomal protein 1 OS=Xenopus laevis                       | zfy1         |  |  |   |   |  |   |      |      |
| Q05116;dsrrswapns_comp | Dual specificity mitogen-activated protein kinase OS=Xenopus laevis         | map2k1       |  |  |   | Y |  |   | TRUE | TRUE |
| Q05AW6;CL3514Contig2   | MGC154502 protein OS=Xenopus laevis                                         | MGC154502    |  |  |   |   |  |   |      |      |
| Q05AW7                 | Cytoplasmic tRNA 2-thiolation protein OS=Xenopus laevis                     | ctu1         |  |  |   | Y |  |   | TRUE | TRUE |
| Q05AX8                 | Lap-1 protein OS=Xenopus laevis                                             | lap1         |  |  |   |   |  |   |      |      |
| Q05AY5                 | LOC414691 protein OS=Xenopus laevis GN=LOC414691 PE=2 SV=1 - (Q05AY5_XENLA) |              |  |  |   |   |  |   |      |      |
| Q05AY9                 | LOC398450 protein OS=Xenopus laevis                                         | LOC398450    |  |  |   |   |  |   |      |      |
| Q06271                 | Integrin alpha 2 subunit (Fragment) OS=Xenopus laevis                       | itga2        |  |  |   |   |  |   |      |      |
| Q07254                 | 40S ribosomal protein S10 OS=Xenopus laevis                                 | rps10        |  |  | Y | Y |  |   | TRUE | TRUE |
| Q08AW9                 | LOC100158398 protein OS=Xenopus laevis                                      | slc2a9       |  |  |   |   |  |   |      |      |
| Q08AX1                 | LOC100158396 protein OS=Xenopus laevis                                      | khl32        |  |  |   | Y |  |   | TRUE | TRUE |
| Q08AX4                 | LOC100158394 protein OS=Xenopus laevis                                      | LOC100158394 |  |  |   |   |  |   |      |      |
| Q08AY2                 | LOC100158387 protein OS=Xenopus laevis                                      | LOC100158387 |  |  |   |   |  |   |      |      |
| Q08B23                 | LOC733299 protein OS=Xenopus laevis                                         | ngly1        |  |  |   | Y |  |   | TRUE | TRUE |
| Q08B28                 | LOC100158365 protein OS=Xenopus laevis                                      | usp7         |  |  |   |   |  |   |      |      |
| Q08B62                 | LOC100158340 protein OS=Xenopus laevis                                      | LOC100158340 |  |  |   |   |  |   |      |      |
| Q08B79                 | LOC733250 protein (Fragment) OS=Xenopus laevis                              | LOC733250    |  |  |   |   |  |   |      |      |
| Q08B84                 | E3 ubiquitin-protein ligase RNF19B OS=Xenopus laevis                        | rnf19b       |  |  |   | Y |  |   | TRUE | TRUE |
| Q09006;CL1198Contig1   | Stathmin-1-A OS=Xenopus laevis                                              | stmn1        |  |  |   | Y |  |   | TRUE | TRUE |
| Q0IH17                 | LOC100125665 protein OS=Xenopus laevis                                      | capn3        |  |  |   | Y |  |   | TRUE | TRUE |
| Q0IH19                 | MGC154878 protein OS=Xenopus laevis                                         | map1lc3c     |  |  |   | Y |  |   | TRUE | TRUE |
| Q0IH25                 | Kntc2 protein OS=Xenopus laevis                                             | kntc2        |  |  |   |   |  |   |      |      |
| Q0IH27                 | Hmg20b protein OS=Xenopus laevis                                            | hmg20b       |  |  |   | Y |  |   | TRUE | TRUE |
| Q0IH31                 | MGC154809 protein OS=Xenopus laevis GN=snrpg PE=4 SV=1 - (Q0IH31_XENLA)     |              |  |  |   |   |  |   |      |      |
| Q0IH31;CL15343Contig1  | MGC154809 protein OS=Xenopus laevis                                         | snrpg        |  |  |   | Y |  |   | TRUE | TRUE |
| Q0IH65                 | LOC733268 protein OS=Xenopus laevis GN=LOC733268 PE=2 SV=1 - (Q0IH65_XENLA) |              |  |  |   |   |  |   |      |      |
| Q0IH66                 | Ddx10 protein OS=Xenopus laevis                                             | ddx10        |  |  |   | Y |  |   | TRUE | TRUE |
| Q0IH80                 | MGC154542 protein OS=Xenopus laevis                                         | c1ql4        |  |  |   |   |  |   |      |      |
| Q0IH85                 | LOC398205 protein OS=Xenopus laevis                                         | ruvb2        |  |  |   | Y |  |   | TRUE | TRUE |
| Q0IHC8                 | MGC115147 protein OS=Xenopus laevis                                         | vps37a       |  |  |   | Y |  |   | TRUE | TRUE |
| Q0IHC9                 | MGC154449 protein OS=Xenopus laevis                                         | nif31        |  |  |   | Y |  |   | TRUE | TRUE |
| Q0IHE9                 | MGC154408 protein OS=Xenopus laevis                                         | agpat6       |  |  |   |   |  |   |      |      |



|                        |                                                                               |             |  |  |   |   |   |  |      |      |
|------------------------|-------------------------------------------------------------------------------|-------------|--|--|---|---|---|--|------|------|
| Q0IHF9                 | Store-operated calcium entry-assoc                                            | tmem66      |  |  |   | Y |   |  | TRUE | TRUE |
| Q0IHG1;CL10048Contig1  | MGC154377 protein OS=Xenopus l                                                | rplp2       |  |  |   | Y |   |  | TRUE | TRUE |
| Q0IHG7                 | Stk4 protein OS=Xenopus laevis GN                                             | stk4        |  |  |   | Y |   |  | TRUE | TRUE |
| Q0IHH7;dsrrswapns_comp | MGC154345 protein OS=Xenopus l                                                | I G C154345 |  |  |   |   |   |  |      |      |
| Q0IHH7                 | THAP domain-containing protein 5                                              | thap5       |  |  |   | Y |   |  | TRUE | TRUE |
| Q0IHJ5                 | MGC154315 protein OS=Xenopus laevis GN=MGC154315 PE=2 SV=1 - [Q0IHJ5_XENLA]   |             |  |  |   |   |   |  |      |      |
| Q0IHJ7;CL8685Contig1   | MGC154312 protein OS=Xenopus l                                                | I G C154312 |  |  |   |   |   |  |      |      |
| Q0IHJ9                 | MGC154309 protein OS=Xenopus l                                                | nsun6       |  |  |   |   |   |  |      |      |
| Q153D9                 | Receptor tyrosine kinase ErbB4 OS                                             | erbb4       |  |  |   | Y |   |  | TRUE | TRUE |
| Q1JQ83                 | MGC130971 protein OS=Xenopus l                                                | scml2       |  |  |   | Y |   |  | TRUE | TRUE |
| Q1JV76                 | ADP ribosylation factor GAP protein                                           | agd         |  |  |   |   |   |  |      |      |
| Q1W3Z6                 | Silencing mediator for retinoid and t                                         | ncor2       |  |  |   | Y |   |  | TRUE | TRUE |
| Q1W9P0                 | Secretory pathway Ca,Mn-ATPase                                                | atp2c2      |  |  |   |   |   |  |      |      |
| Q1XG43;CL46Contig7     | Sc2-2A OS=Xenopus laevis GN=S                                                 | scc22       |  |  |   |   |   |  |      |      |
| Q2E121                 | RE1-silencing transcription factor A                                          | rest        |  |  |   | Y |   |  | TRUE | TRUE |
| Q2KHQ3                 | LOC446279 protein OS=Xenopus la                                               | daxx        |  |  |   | Y |   |  | TRUE | TRUE |
| Q2NLB0                 | UPF0469 protein KIAA0907 homolog OS=Xenopus laevis PE=2 SV=1 - [K0907_XENLA]  |             |  |  |   |   |   |  |      |      |
| Q2NLB1                 | MGC130901 protein OS=Xenopus l                                                | I G C130901 |  |  |   |   |   |  |      |      |
| Q2QDE3                 | eef2-prov protein OS=Xenopus laev                                             | entpd3      |  |  |   | Y |   |  | TRUE | TRUE |
| Q2T9K2                 | Transcription factor AP-2-epsilon OS                                          | tfap2e      |  |  |   | Y |   |  | TRUE | TRUE |
| Q2T9K3                 | MGC131110 protein OS=Xenopus l                                                | I G C131110 |  |  |   |   |   |  |      |      |
| Q2TAD6                 | LOC431838 protein OS=Xenopus la                                               | kifc3       |  |  |   | Y | Y |  | TRUE | TRUE |
| Q2TAD9                 | Cysteine and histidine-rich protein 1                                         | cyhr1       |  |  |   | Y |   |  | TRUE | TRUE |
| Q2TAE3                 | Dual specificity tyrosine-phosphoryl                                          | dyrk1a      |  |  |   | Y |   |  | TRUE | TRUE |
| Q2TAF4;CL5014Contig2   | Integrator complex subunit 6-A OS=                                            | ints6       |  |  |   | Y |   |  | TRUE | TRUE |
| Q2TAF7                 | MGC132159 protein OS=Xenopus l                                                | cep85       |  |  |   | Y |   |  | TRUE | TRUE |
| Q2TAH5;CL50Contig10    | LOC495416 protein OS=Xenopus la                                               | sec63       |  |  |   | Y | Y |  | TRUE | TRUE |
| Q2TAH7;CL1661Contig1   | Putative uncharacterized protein OS=Xenopus laevis PE=2 SV=1 - [Q2TAH7_XENLA] |             |  |  |   |   |   |  |      |      |
| Q2TAQ0                 | MGC131229 protein OS=Xenopus l                                                | fbxo38      |  |  |   | Y |   |  | TRUE | TRUE |
| Q2TAQ1                 | Putative elongator complex protein                                            | ikbkap      |  |  |   | Y |   |  | TRUE | TRUE |
| Q2TAQ2                 | LOC733439 protein (Fragment) OS=                                              | LOC733439   |  |  |   |   |   |  |      |      |
| Q2TAS0                 | MGC130982 protein OS=Xenopus l                                                | tjap1       |  |  |   |   |   |  |      |      |
| Q2TAS1;CL8143Contig1   | MGC130979 protein OS=Xenopus l                                                | sptlc3      |  |  |   | Y |   |  | TRUE | TRUE |
| Q2TAT7;CL10539Contig1  | MGC130882 protein OS=Xenopus l                                                | uqcrq       |  |  |   | Y |   |  | TRUE | TRUE |
| Q2TAV8;CL6367Contig1   | Wdhd1 protein OS=Xenopus laevis                                               | wdhd1       |  |  |   | Y |   |  | TRUE | TRUE |
| Q2TAV9                 | Putative uncharacterized protein OS                                           | galnt6.2    |  |  |   |   |   |  |      |      |
| Q2V0J3;CL661Contig1    | Semaphorin 6D4 OS=Xenopus laev                                                | sema6d      |  |  |   | Y |   |  | TRUE | TRUE |
| Q2VPG2                 | LOC733435 protein (Fragment) OS=                                              | LOC733435   |  |  |   |   |   |  |      |      |
| Q2VPG9;CL1Contig756    | MGC132166 protein OS=Xenopus l                                                | suclg2      |  |  |   | Y |   |  | TRUE | TRUE |
| Q2VPH0;CL1377Contig2   | MGC132155 protein OS=Xenopus l                                                | I G C132155 |  |  |   |   |   |  |      |      |
| Q2VPH6                 | LOC432342 protein OS=Xenopus la                                               | cops2       |  |  |   | Y |   |  | TRUE | TRUE |
| Q2VPK9                 | Acyl-coenzyme A oxidase OS=Xend                                               | acox1       |  |  |   | Y |   |  | TRUE | TRUE |
| Q2VPL5                 | MGC131247 protein OS=Xenopus l                                                | I G C131247 |  |  |   |   |   |  |      |      |
| Q2VPL7                 | LOC733431 protein (Fragment) OS=                                              | LOC733431   |  |  |   |   |   |  |      |      |
| Q2VPL8                 | MGC131189 protein OS=Xenopus l                                                | aldh6a1     |  |  |   |   |   |  |      |      |
| Q2VPN0                 | Zbtb7b protein OS=Xenopus laevis                                              | zbtb7b      |  |  |   | Y |   |  | TRUE | TRUE |
| Q2VPN4;CL5571Contig1   | MGC52890 protein OS=Xenopus la                                                | pnlip       |  |  |   |   |   |  |      |      |
| Q32N55                 | Pentatricopeptide repeat-containing                                           | ptcd3       |  |  |   | Y |   |  | TRUE | TRUE |
| Q32N62                 | LOC733423 protein (Fragment) OS=                                              | LOC733423   |  |  |   |   |   |  |      |      |
| Q32NG0                 | Adenosine deaminase domain-cont                                               | adad1       |  |  |   | Y |   |  | TRUE | TRUE |
| Q32NH1                 | LOC733414 protein (Fragment) OS=                                              | LOC733414   |  |  |   |   |   |  |      |      |
| Q32NH8                 | 1-phosphatidylinositol 4,5-bisphosp                                           | plcd4       |  |  |   | Y |   |  | TRUE | TRUE |
| Q32NJ6;CL220Contig1    | Uncharacterized protein OS=Xenop                                              | yap1        |  |  |   |   |   |  |      |      |
| Q32NK0                 | MGC131089 protein OS=Xenopus l                                                | myef2       |  |  |   | Y |   |  | TRUE | TRUE |
| Q32NL8                 | MGC131051 protein OS=Xenopus l                                                | slc3a1      |  |  |   | Y | Y |  | TRUE | TRUE |
| Q32NN1                 | MGC131022 protein OS=Xenopus l                                                | recql       |  |  |   | Y | Y |  | TRUE | TRUE |
| Q32NR3                 | DNA-binding protein RFX2 OS=Xen                                               | rfx2        |  |  |   |   |   |  |      |      |
| Q32NR8                 | MGC130896 protein OS=Xenopus l                                                | ndufs2      |  |  |   |   |   |  |      |      |
| Q32NS5                 | MGC130857 protein OS=Xenopus l                                                | abhd1       |  |  |   |   |   |  |      |      |
| Q32NS7;CL1Contig287    | MGC52825 protein OS=Xenopus la                                                | hmgb2       |  |  |   | Y |   |  | TRUE | TRUE |
| Q32NS8                 | Adenylyl cyclase-associated protein                                           | MGC52725    |  |  |   |   |   |  |      |      |
| Q32NU1;CL3333Contig1   | Putative uncharacterized protein OS=Xenopus laevis PE=2 SV=1 - [Q32NU1_XENLA] |             |  |  |   |   |   |  |      |      |
| Q32NV2                 | MGC78960 protein OS=Xenopus la                                                | wdr16       |  |  |   | Y |   |  | TRUE | TRUE |
| Q32NW0                 | Putative uncharacterized protein OS=Xenopus laevis PE=2 SV=1 - [Q32NW0_XENLA] |             |  |  |   |   |   |  |      |      |
| Q3B8B3;CL12613Contig1  | MGC132191 protein OS=Xenopus l                                                | uchl1       |  |  |   | Y |   |  | TRUE | TRUE |
| Q3B8C5;CL5938Contig2   | MGC131368 protein OS=Xenopus la                                               | ndufab1     |  |  |   | Y |   |  | TRUE | TRUE |
| Q3B8D3                 | MGC68480 protein OS=Xenopus la                                                | MGC68480    |  |  |   |   |   |  |      |      |
| Q3B8E3                 | Phosphotyrosine phosphohistidine inc                                          | lhpp        |  |  |   | Y |   |  | TRUE | TRUE |
| Q3B8H6                 | Pofut1 protein OS=Xenopus laevis                                              | pofut1      |  |  |   | Y | Y |  | TRUE | TRUE |
| Q3B8I3;CL3171Contig2   | MGC130910 protein OS=Xenopus l                                                | rpl7        |  |  |   | Y | Y |  | TRUE | TRUE |
| Q3B8I6                 | Wu:fj06d02 protein OS=Xenopus laevis GN=wu:fj06d02 PE=2 SV=1 - [Q3B8I6_XENLA] |             |  |  |   |   |   |  |      |      |
| Q3B8J4                 | MGC130819 protein OS=Xenopus l                                                | tek2        |  |  |   | Y |   |  | TRUE | TRUE |
| Q3B8J8                 | Succinate dehydrogenase [ubiquinc                                             | sdhb        |  |  |   | Y |   |  | TRUE | TRUE |
| Q3KPK3                 | Uncharacterized protein OS=Xenopus laevis PE=2 SV=1 - [Q3KPK3_XENLA]          |             |  |  |   |   |   |  |      |      |
| Q3KPK3;CL25783Contig1  | Putative uncharacterized protein OS=Xenopus laevis PE=2 SV=1 - [Q3KPK3_XENLA] |             |  |  |   |   |   |  |      |      |
| Q3KPN6                 | Proteasome subunit alpha type OS=                                             | psma        |  |  |   |   |   |  |      |      |
| Q3KPP7                 | Fructose-bisphosphate aldolase OS                                             | aldob       |  |  |   | Y |   |  | TRUE | TRUE |
| Q3KPT4;dsrrswapns_comp | MGC131338 protein OS=Xenopus l                                                | zmat3       |  |  | Y | Y |   |  | TRUE | TRUE |
| Q3KPT7                 | 3-hydroxybutyrate dehydrogenase t                                             | bdh2        |  |  |   | Y |   |  | TRUE | TRUE |
| Q3KPV2                 | LOC398657 protein OS=Xenopus la                                               | LOC398657   |  |  |   |   |   |  |      |      |
| Q3KPV4;CL10181Contig1  | Transmembrane and ubiquitin-like d                                            | tmub1       |  |  |   | Y |   |  | TRUE | TRUE |
| Q3KPV9;CL5420Contig1   | Proteasome subunit beta type OS=                                              | psmb        |  |  |   |   |   |  |      |      |
| Q3KPV6                 | LOC733370 protein (Fragment) OS=                                              | LOC733370   |  |  |   |   |   |  |      |      |
| Q3KPX1                 | LOC733368 protein (Fragment) OS=                                              | LOC733368   |  |  |   |   |   |  |      |      |
| Q3KQ21                 | MGC131091 protein OS=Xenopus l                                                | slc35a3.1   |  |  |   |   |   |  |      |      |
| Q3KQ31                 | LOC733344 protein (Fragment) OS=                                              | LOC733344   |  |  |   |   |   |  |      |      |

|                       |                                                                                          |              |   |   |   |   |   |      |      |
|-----------------------|------------------------------------------------------------------------------------------|--------------|---|---|---|---|---|------|------|
| Q3KQ47;CL20072Contig1 | MGC130974 protein OS=Xenopus laevis                                                      | tiam1        |   |   | Y |   |   | TRUE | TRUE |
| Q3KQ54;CL6751Contig1  | MGC130953 protein OS=Xenopus laevis                                                      | atic         |   |   | Y |   |   | TRUE | TRUE |
| Q3KQ55                | MGC130949 protein OS=Xenopus laevis                                                      | uevid        |   |   | Y |   |   | TRUE | TRUE |
| Q3KQ57                | MGC130942 protein OS=Xenopus laevis                                                      | trappc12     |   |   |   |   |   |      |      |
| Q3KQ82                | Profilin OS=Xenopus laevis GN=pfri                                                       | pfri         |   |   |   |   |   | TRUE | TRUE |
| Q3KQA5                | Rab3d protein OS=Xenopus laevis                                                          | rab3d        |   |   | Y |   |   | TRUE | TRUE |
| Q3KQB6                | CTD small phosphatase-like protein                                                       | ctdspi2b     |   |   |   | Y |   | TRUE | TRUE |
| Q3KQC0;CL5489Contig2  | LOC414601 protein OS=Xenopus laevis GN=LOC414601 PE=2 SV=1 - [Q3KQC0_XENLA]              |              |   |   |   |   |   |      |      |
| Q3KQC9                | Rps16 protein OS=Xenopus laevis                                                          | rps16        |   |   | Y |   |   | TRUE | TRUE |
| Q3LH63                | Doublesex- and mab-3-related transcription factor 1                                      | dmrt1a       |   |   | Y |   |   | TRUE | TRUE |
| Q3MV19                | TNF receptor-associated factor 6-A                                                       | traf6        |   |   | Y |   |   | TRUE | TRUE |
| Q3S2E9                | Carbamoyl-phosphate synthetase large subunit                                             | cps1         |   |   |   |   |   |      |      |
| Q3SYN2;CL2881Contig3  | MGC114703 protein OS=Xenopus laevis                                                      | mob3a        |   |   |   |   |   |      |      |
| Q3ZM03;CL912Contig2   | 40S ribosomal protein SA OS=Xenopus laevis                                               | rpsa         | Y | Y |   |   |   | TRUE | TRUE |
| Q3ZPL6                | Lethal giant larvae protein 1                                                            | lgl1         |   |   |   |   |   |      |      |
| Q498E9                | MGC115581 protein OS=Xenopus laevis                                                      | pus7         |   |   | Y |   |   | TRUE | TRUE |
| Q498G7                | PKC-delta2 protein OS=Xenopus laevis                                                     | prkcd        |   |   | Y |   |   | TRUE | TRUE |
| Q498H6                | MGC114937 protein OS=Xenopus laevis                                                      | papss1       |   |   |   |   |   |      |      |
| Q498I1                | LOC398508 protein OS=Xenopus laevis                                                      | grhrp.2      | Y | Y |   |   |   | TRUE | TRUE |
| Q498L1                | MGC114631 protein OS=Xenopus laevis                                                      | IGC114631    |   |   |   |   |   |      |      |
| Q498L1;CL2523Contig1  | MGC114631 protein OS=Xenopus laevis                                                      | IGC114631    |   |   |   |   |   |      |      |
| Q498L4                | LOC734164 protein (Fragment) OS=Xenopus laevis                                           | LOC734164    |   |   |   |   |   |      |      |
| Q4A520;CL7515Contig1  | Putative transient receptor potential channel subunit 1                                  | nomp         |   |   |   |   |   |      |      |
| Q4FZM4                | LOC100036775 protein (Fragment) OS=Xenopus laevis                                        | LOC100036775 |   |   |   |   |   |      |      |
| Q4FZM5;CL2718Contig3  | MGC116545 protein OS=Xenopus laevis                                                      | cyc1         |   |   | Y |   | Y | TRUE | TRUE |
| Q4FZP3                | Cytochrome c oxidase subunit 6A, mitochondrial                                           | cox6a1       |   |   | Y |   |   | TRUE | TRUE |
| Q4FZP9                | MGC116466 protein OS=Xenopus laevis GN=MGC116466 PE=2 SV=1 - [Q4FZP9_XENLA]              |              |   |   |   |   |   |      |      |
| Q4FZQ3                | Rpl34 protein OS=Xenopus laevis                                                          | rpl34        |   |   |   |   |   |      |      |
| Q4FZQ7                | MGC116425 protein OS=Xenopus laevis                                                      | rpl35        |   |   | Y |   |   | TRUE | TRUE |
| Q4FZW1                | LOC443587 protein (Fragment) OS=Xenopus laevis                                           | LOC443587    |   |   |   |   |   |      |      |
| Q4FZX2                | LOC495168 protein OS=Xenopus laevis                                                      | itih2        |   |   | Y |   |   | TRUE | TRUE |
| Q4FZX3                | LOC432087 protein (Fragment) OS=Xenopus laevis                                           | LOC432087    |   |   |   |   |   |      |      |
| Q4G444                | Polycystic kidney disease protein 1                                                      | pkd1         |   |   | Y |   |   | TRUE | TRUE |
| Q4JNX8                | RECQL4-helicase-like protein OS=Xenopus laevis                                           | rts          |   |   |   |   |   |      |      |
| Q4KL87                | MGC116558 protein OS=Xenopus laevis                                                      | pde9a        |   |   |   |   |   |      |      |
| Q4KL91;CL4667Contig1  | Proton-coupled amino acid transporter                                                    | slc36a4      |   |   | Y |   |   | TRUE | TRUE |
| Q4KL98                | MGC116533 protein OS=Xenopus laevis                                                      | stoml2       |   |   | Y |   |   | TRUE | TRUE |
| Q4KLA5                | MGC84800 protein OS=Xenopus laevis                                                       | MGC84800     |   |   |   |   |   |      |      |
| Q4KLB0                | Glyoxalase domain-containing protein 1                                                   | glod5        |   |   | Y |   |   | TRUE | TRUE |
| Q4KLF3                | Protein KTI12 homolog OS=Xenopus laevis                                                  | kti12        |   |   | Y |   |   | TRUE | TRUE |
| Q4KLF5;CL749Contig1   | Transcription factor BTF3 homolog                                                        | btf3l4       |   |   | Y |   |   | TRUE | TRUE |
| Q4KLP7                | MGC115718 protein OS=Xenopus laevis                                                      | esco2        |   |   |   |   |   |      |      |
| Q4KLP9;CL7902Contig1  | MGC115697 protein OS=Xenopus laevis                                                      | parg         |   |   | Y |   |   | TRUE | TRUE |
| Q4KLS8;CL4540Contig2  | Arginine and glutamate-rich protein                                                      | arglu1       |   |   | Y |   |   | TRUE | TRUE |
| Q4KLT2                | MGC115451 protein OS=Xenopus laevis                                                      | IGC115451    |   |   |   |   |   |      |      |
| Q4KLV8                | LOC733291 protein (Fragment) OS=Xenopus laevis                                           | LOC733291    |   |   |   |   |   |      |      |
| Q4KLW5                | MGC83233 protein OS=Xenopus laevis                                                       | psmd2        |   |   | Y |   |   | TRUE | TRUE |
| Q4K LX0;CL907Contig1  | MGC114675 protein OS=Xenopus laevis                                                      | atp6v1a      |   |   | Y |   |   | TRUE | TRUE |
| Q4QQP6;CL19376Contig1 | Putative uncharacterized protein OS=Xenopus laevis PE=2 SV=1 - [Q4QQP6_XENLA]            |              |   |   |   |   |   |      |      |
| Q4QR21                | Putative uncharacterized protein (Fragment) OS=Xenopus laevis PE=2 SV=1 - [Q4QR21_XENLA] |              |   |   |   |   |   |      |      |
| Q4QR22;CL4816Contig2  | MGC114925 protein OS=Xenopus laevis GN=MGC114925 PE=2 SV=1 - [Q4QR22_XENLA]              |              |   |   |   |   |   |      |      |
| Q4QR32                | MGC114875 protein OS=Xenopus laevis                                                      | rps29        |   |   | Y |   |   | TRUE | TRUE |
| Q4QR44                | MGC114789 protein OS=Xenopus laevis                                                      | rps15a       |   |   | Y |   |   | TRUE | TRUE |
| Q4QR45;CL3635Contig1  | Importin subunit alpha OS=Xenopus laevis                                                 | kpnab1       |   |   | Y |   |   | TRUE | TRUE |
| Q4QR49                | Putative uncharacterized protein OS=Xenopus laevis PE=2 SV=1 - [Q4QR49_XENLA]            |              |   |   |   |   |   |      |      |
| Q4QR53                | LOC443652 protein OS=Xenopus laevis                                                      | f2           |   |   |   |   |   |      |      |
| Q4QR55                | VgRBP60 protein OS=Xenopus laevis                                                        | vgrbp60      |   |   |   |   |   |      |      |
| Q4QR58                | Eukaryotic translation initiation factor 3                                               | eif3c        |   |   | Y |   |   | TRUE | TRUE |
| Q4QY31;CL2078Contig2  | Aryl hydrocarbon receptor 1 alpha class 1                                                | ahr1a        |   |   |   |   |   |      |      |
| Q4U0Y4                | Nucleosome assembly protein 1-like                                                       | nap111       |   |   | Y |   |   | TRUE | TRUE |
| Q4V7G8                | MGC115727 protein OS=Xenopus laevis                                                      | sirt3.2      |   |   | Y |   |   | TRUE | TRUE |
| Q4V7J2                | LOC733267 protein (Fragment) OS=Xenopus laevis                                           | LOC733267    |   |   |   |   |   |      |      |
| Q4V7J2                | LOC733264 protein (Fragment) OS=Xenopus laevis GN=LOC733264 PE=2 SV=1 - [Q4V7J2_XENLA]   |              |   |   |   |   |   |      |      |
| Q4V7J4                | MGC115652 protein OS=Xenopus laevis                                                      | IGC115652    |   |   |   |   |   |      |      |
| Q4V7K0                | Putative uncharacterized protein OS=Xenopus laevis PE=2 SV=1 - [Q4V7K0_XENLA]            |              |   |   |   |   |   |      |      |
| Q4V7K1                | MGC115622 protein OS=Xenopus laevis                                                      | eif4e2       |   |   |   |   |   |      |      |
| Q4V7K2                | MGC115621 protein OS=Xenopus laevis                                                      | utp18        |   |   | Y |   |   | TRUE | TRUE |
| Q4V7L1                | MGC115598 protein OS=Xenopus laevis                                                      | IGC115598    |   |   |   |   |   |      |      |
| Q4V7N2                | tRNA (cytosine(34)-C(5))-methyltransferase                                               | nsun2        |   |   | Y |   |   | TRUE | TRUE |
| Q4V7Q6                | Serine/threonine-protein kinase ULK1                                                     | ulk3         |   |   | Y |   |   | TRUE | TRUE |
| Q4V7V6                | MGC115247 protein OS=Xenopus laevis                                                      | prodh        |   |   | Y |   |   | TRUE | TRUE |
| Q4V7V7                | MGC115244 protein OS=Xenopus laevis                                                      | hmgxb3       |   |   | Y |   |   | TRUE | TRUE |
| Q4V7W0                | MGC80416 protein OS=Xenopus laevis                                                       | MGC80416     |   |   |   |   |   |      |      |
| Q4V7W5                | Polyhomeotic-like protein 2 OS=Xenopus laevis                                            | phc2         |   |   |   |   |   |      |      |
| Q4V7X5                | LOC733254 protein (Fragment) OS=Xenopus laevis                                           | LOC733254    |   |   |   |   |   |      |      |
| Q4V7Y7                | Katanin p80 WD40-containing subunit                                                      | katnb1       |   |   | Y |   |   | TRUE | TRUE |
| Q4V7Z2                | MGC114910 protein OS=Xenopus laevis                                                      | msn          |   |   |   |   |   |      |      |
| Q4V801                | LOC398774 protein OS=Xenopus laevis                                                      | OC398774     |   |   |   |   |   |      |      |
| Q4V813;CL6656Contig1  | Adh3 protein OS=Xenopus laevis                                                           | adh5         |   |   | Y |   |   | TRUE | TRUE |
| Q4V837                | Denticleless protein homolog A OS=Xenopus laevis                                         | dtl          |   |   |   |   |   |      |      |
| Q4V847                | Integrator complex subunit 8 OS=Xenopus laevis                                           | ints8        |   |   | Y |   |   | TRUE | TRUE |
| Q4V866                | MGC114642 protein OS=Xenopus laevis                                                      | clpx         |   |   | Y |   |   | TRUE | TRUE |
| Q4V871                | MGC114621 protein OS=Xenopus laevis GN=MGC114621 PE=4 SV=1                               |              | Y |   |   |   |   | TRUE | TRUE |
| Q4VAE4                | MGC115325 protein OS=Xenopus laevis                                                      | IGC115325    |   |   |   |   |   |      |      |
| Q501Q2                | Putative uncharacterized protein OS=Xenopus laevis PE=2 SV=1 - [Q501Q2_XENLA]            |              |   |   |   |   |   |      |      |
| Q501Q8                | MGC99195 protein OS=Xenopus laevis                                                       | sel1l        |   |   | Y |   |   | TRUE | TRUE |

|                         |                                                                  |           |                                         |   |  |   |  |      |      |
|-------------------------|------------------------------------------------------------------|-----------|-----------------------------------------|---|--|---|--|------|------|
| Q52KN0;CL14329Contig1   | MGC115198 protein OS=Xenopus laevis                              | LOC115198 |                                         |   |  |   |  |      |      |
| Q52KV8                  | MGC115036 protein OS=Xenopus laevis                              | LOC115036 |                                         |   |  |   |  |      |      |
| Q52KV9                  | LOC733224 protein (Fragment) OS=Xenopus laevis                   | LOC733224 |                                         |   |  |   |  |      |      |
| Q52KW6;TC418765 UniRef  | MGC115285 protein OS=Xenopus laevis                              | LOC115285 |                                         |   |  |   |  |      |      |
| Q52KY1;CL6681Contig1    | Vdac2 protein OS=Xenopus laevis                                  | vdac2     | Y                                       | Y |  |   |  | TRUE | TRUE |
| Q52KZ3                  | LOC733223 protein (Fragment) OS=Xenopus laevis                   | LOC733223 |                                         |   |  |   |  |      |      |
| Q52L09                  | MGC115031 protein OS=Xenopus laevis                              | hmp19     |                                         |   |  |   |  |      |      |
| Q52L36                  | MGC114755 protein OS=Xenopus laevis                              | cisd1     |                                         | Y |  |   |  | TRUE | TRUE |
| Q52M98                  | 14-3-3 protein theta OS=Xenopus laevis                           | ywhaq     |                                         | Y |  |   |  | TRUE | TRUE |
| Q53177                  | Exportin-6-A OS=Xenopus laevis                                   | xpo6      |                                         | Y |  |   |  | TRUE | TRUE |
| Q561N7                  | LOC733199 protein (Fragment) OS=Xenopus laevis                   | LOC733199 |                                         |   |  |   |  |      |      |
| Q563C3;CL549Contig3     | Sororin OS=Xenopus laevis                                        | cdca5     | Y                                       | Y |  |   |  | TRUE | TRUE |
| Q566F3;CL9914Contig1    | MGC114950 protein OS=Xenopus laevis                              | slc45a2   |                                         | Y |  |   |  | TRUE | TRUE |
| Q566H1                  | MGC115310 protein OS=Xenopus laevis                              | crmp1     |                                         |   |  |   |  |      |      |
| Q566H3;CL12776Contig1   | MGC114733 protein OS=Xenopus laevis                              | cebpg     |                                         | Y |  |   |  | TRUE | TRUE |
| Q566I1                  | INO80 complex subunit D OS=Xenopus laevis                        | ino80d    |                                         | Y |  |   |  | TRUE | TRUE |
| Q569T0                  | MGC115178 protein OS=Xenopus laevis                              | hdac10    |                                         | Y |  |   |  | TRUE | TRUE |
| Q569T6;CL3058Contig3    | MGC115028 protein OS=Xenopus laevis                              | cnppd1    |                                         | Y |  | Y |  | TRUE | TRUE |
| Q569U3                  | Fcp1 protein OS=Xenopus laevis                                   | fcp1      |                                         |   |  |   |  |      |      |
| Q569Z1                  | Eukaryotic translation initiation factor 4E OS=Xenopus laevis    | eif3b     |                                         | Y |  |   |  | TRUE | TRUE |
| Q56A68                  | LOC733185 protein (Fragment) OS=Xenopus laevis                   | LOC733185 |                                         |   |  |   |  |      |      |
| Q588Y8;CL1100Contig2    | 26S proteasome subunit OS=Xenopus laevis                         | rpn10c    |                                         |   |  |   |  |      |      |
| Q58E21                  | Proteasome subunit alpha type OS=Xenopus laevis                  | psma1     |                                         |   |  |   |  |      |      |
| Q5BIY1                  | MGC84975 protein OS=Xenopus laevis                               | rab11fip2 |                                         | Y |  |   |  | TRUE | TRUE |
| Q5BJ43;CL26281Contig1   | LOC496181 protein OS=Xenopus laevis                              | LOC496181 | PE=2 SV=1 - [Q5BJ43_XENLA]              |   |  |   |  |      |      |
| Q5BL86                  | MGC85088 protein OS=Xenopus laevis                               | blmh      |                                         |   |  |   |  |      |      |
| Q5EAU9;CL98Contig4      | Regulator of microtubule dynamics OS=Xenopus laevis              | fam82a2   |                                         | Y |  |   |  | TRUE | TRUE |
| Q5EAV5;CL3725Contig2    | ICLN protein OS=Xenopus laevis                                   | iclcn     |                                         |   |  |   |  |      |      |
| Q5EAX3                  | MGC85022 protein OS=Xenopus laevis                               | wrap73    |                                         | Y |  |   |  | TRUE | TRUE |
| Q5EAX6                  | MGC84950 protein OS=Xenopus laevis                               | cog6      |                                         | Y |  |   |  | TRUE | TRUE |
| Q5EAY2                  | Mediator of RNA polymerase II transcription OS=Xenopus laevis    | med19     |                                         |   |  |   |  |      |      |
| Q5EAY8                  | Transmembrane anterior posterior protein OS=Xenopus laevis       | tapt1     |                                         |   |  |   |  |      |      |
| Q5EE04                  | TPR (Fragment) OS=Xenopus laevis                                 | tpr       |                                         | Y |  |   |  | TRUE | TRUE |
| Q5EFE9                  | BMAL1 OS=Xenopus laevis                                          | bmal1     |                                         |   |  |   |  |      |      |
| Q5EY87                  | Grainyhead-like protein 1 homolog OS=Xenopus laevis              | grhl1     |                                         | Y |  | Y |  | TRUE | TRUE |
| Q5F1L3                  | Retinal ABCA4 transporter OS=Xenopus laevis                      | abca4     |                                         |   |  |   |  |      |      |
| Q5FWK8                  | MGC85124 protein OS=Xenopus laevis                               | alox12b   |                                         |   |  |   |  |      |      |
| Q5FWM7;CL10311Contig1   | MGC84940 protein OS=Xenopus laevis                               | fabp4     | Y                                       | Y |  |   |  | TRUE | TRUE |
| Q5FWN6                  | MGC85173 protein OS=Xenopus laevis                               | tbc1d19   |                                         | Y |  |   |  | TRUE | TRUE |
| Q5FWP2                  | Protein Smaug homolog 1 OS=Xenopus laevis                        | samd4a    |                                         | Y |  |   |  | TRUE | TRUE |
| Q5FWQ3                  | LOC733157 protein (Fragment) OS=Xenopus laevis                   | LOC733157 |                                         |   |  |   |  |      |      |
| Q5FWW2                  | MGC98917 protein OS=Xenopus laevis                               | col6a2    |                                         |   |  |   |  |      |      |
| Q5FWW4                  | LOC398552 protein OS=Xenopus laevis                              | sgk223    |                                         | Y |  |   |  | TRUE | TRUE |
| Q5FWX4                  | LOC733151 protein (Fragment) OS=Xenopus laevis                   | LOC733151 |                                         |   |  |   |  |      |      |
| Q5FWX5                  | MGC98794 protein OS=Xenopus laevis                               | MGC98794  |                                         |   |  |   |  |      |      |
| Q5HZ81                  | MGC85202 protein OS=Xenopus laevis                               | cep70     |                                         |   |  |   |  |      |      |
| Q5HZ99;CL2118Contig4    | MGC85083 protein OS=Xenopus laevis                               | dsc3      |                                         | Y |  |   |  | TRUE | TRUE |
| Q5HZM8                  | Putative uncharacterized protein OS=Xenopus laevis               | dusp11    |                                         | Y |  |   |  | TRUE | TRUE |
| Q5HZN3;CL9381Contig1    | NADH dehydrogenase [ubiquinone] OS=Xenopus laevis                | ndufa6    |                                         | Y |  |   |  | TRUE | TRUE |
| Q5HZP4;CL1727Contig2    | LOC496341 protein OS=Xenopus laevis                              | ppp1r13b  |                                         | Y |  | Y |  | TRUE | TRUE |
| Q5HZP7                  | Protein kinase-like protein Sgk196 OS=Xenopus laevis             | sgk196    |                                         | Y |  |   |  | TRUE | TRUE |
| Q5HZQ2                  | LOC496334 protein OS=Xenopus laevis                              | cdk6      |                                         | Y |  |   |  | TRUE | TRUE |
| Q5HZQ5                  | LOC496332 protein (Fragment) OS=Xenopus laevis                   | LOC496332 |                                         |   |  |   |  |      |      |
| Q5HZZ2                  | LOC496311 protein OS=Xenopus laevis                              | LOC496311 |                                         |   |  |   |  |      |      |
| Q5I016                  | LOC496298 protein (Fragment) OS=Xenopus laevis                   | cdc42bbp  |                                         | Y |  |   |  | TRUE | TRUE |
| Q5I047;CL15637Contig1   | Protein FAM173B OS=Xenopus laevis                                | fam173b   |                                         | Y |  |   |  | TRUE | TRUE |
| Q5IJ69;CL32Contig6      | MTGR1 OS=Xenopus laevis                                          | mtgr1     |                                         |   |  |   |  |      |      |
| Q5M781;CL1453Contig4    | Dynein light chain dlc8b OS=Xenopus laevis                       | dynll2    |                                         | Y |  |   |  | TRUE | TRUE |
| Q5M7A9                  | MGC81803 protein OS=Xenopus laevis                               | MGC81803  |                                         |   |  |   |  |      |      |
| Q5M7B8                  | LOC496249 protein OS=Xenopus laevis                              | aga       |                                         | Y |  |   |  | TRUE | TRUE |
| Q5M7C2                  | Sulfotransferase OS=Xenopus laevis                               | sulf2a1   |                                         |   |  |   |  |      |      |
| Q5M7C6                  | Glutathione peroxidase OS=Xenopus laevis                         | gpx1      |                                         | Y |  |   |  | TRUE | TRUE |
| Q5M7C7;dsrrswapns_com   | Protein jagunal homolog 1 OS=Xenopus laevis                      | jagn1     |                                         | Y |  |   |  | TRUE | TRUE |
| Q5M7D5;CL6336Contig3    | LOC496233 protein OS=Xenopus laevis                              | ndufs3    |                                         | Y |  |   |  | TRUE | TRUE |
| Q5M7E3                  | 5-methylcytosine rRNA methyltransferase OS=Xenopus laevis        | nsun4     |                                         | Y |  |   |  | TRUE | TRUE |
| Q5M7F9                  | Lysyl oxidase-like 1 OS=Xenopus laevis                           | lox1      |                                         |   |  |   |  |      |      |
| Q5M9A1                  | LOC496155 protein OS=Xenopus laevis                              | wwtr1     |                                         | Y |  |   |  | TRUE | TRUE |
| Q5M9A4                  | LOC496152 protein OS=Xenopus laevis                              | LOC496152 |                                         |   |  |   |  |      |      |
| Q5M9A9                  | LOC496147 protein OS=Xenopus laevis                              | LOC496147 |                                         |   |  |   |  |      |      |
| Q5MPF8                  | Ataxia telangiectasia mutated OS=Xenopus laevis                  | atm       |                                         | Y |  |   |  | TRUE | TRUE |
| Q5PPR7;CL22579Contig1   | LOC496102 protein OS=Xenopus laevis                              | LOC496102 | PE=2 SV=1 - [Q5PPR7_XENLA]              |   |  |   |  |      |      |
| Q5PPT1                  | LOC496089 protein OS=Xenopus laevis                              | LOC496089 |                                         |   |  |   |  |      |      |
| Q5PPT1;CL4954Contig2    | LOC496089 protein OS=Xenopus laevis                              | LOC496089 | GN=LOC496089 PE=2 SV=1 - [Q5PPT1_XENLA] |   |  |   |  |      |      |
| Q5PPT3                  | ATP-dependent Clp protease proteolytic subunit OS=Xenopus laevis | LOC496087 |                                         |   |  |   |  |      |      |
| Q5PPU1                  | LOC496080 protein (Fragment) OS=Xenopus laevis                   | LOC496080 |                                         |   |  |   |  |      |      |
| Q5PPV5                  | Zinc finger C2HC domain-containing protein OS=Xenopus laevis     | zc2hc1a   |                                         |   |  |   |  |      |      |
| Q5PPY1;TC467635 similar | Malignant T-cell amplified sequence OS=Xenopus laevis            | mcts1     |                                         | Y |  |   |  | TRUE | TRUE |
| Q5PPY4                  | Cluap1 protein OS=Xenopus laevis                                 | cluap1    |                                         | Y |  |   |  | TRUE | TRUE |
| Q5PPZ0;CL18886Contig1   | LOC496039 protein OS=Xenopus laevis                              | LOC496039 |                                         |   |  |   |  |      |      |
| Q5PQ24;CL4416Contig2    | Proteasome subunit beta type OS=Xenopus laevis                   | psmb3     |                                         | Y |  |   |  | TRUE | TRUE |
| Q5PQ40;CL6153Contig3    | LOC495989 protein OS=Xenopus laevis                              | tex26     |                                         |   |  |   |  |      |      |
| Q5PQ49;CL12806Contig1   | LOC495981 protein OS=Xenopus laevis                              | LOC495981 | PE=2 SV=1 - [Q5PQ49_XENLA]              |   |  |   |  |      |      |
| Q5PQ70                  | LOC495963 protein OS=Xenopus laevis                              | LOC495963 |                                         |   |  |   |  |      |      |
| Q5PQ89                  | Ankyrin repeat domain-containing protein OS=Xenopus laevis       | ankrd34b  |                                         | Y |  |   |  | TRUE | TRUE |
| Q5PQ95;CL11117Contig1   | LOC495941 protein OS=Xenopus laevis                              | LOC495941 |                                         |   |  |   |  |      |      |
| Q5RJW7                  | Putative uncharacterized protein OS=Xenopus laevis               | LOC495941 | PE=2 SV=1 - [Q5RJW7_XENLA]              |   |  |   |  |      |      |

|                       |                                                    |                                            |  |  |  |   |   |  |  |      |      |
|-----------------------|----------------------------------------------------|--------------------------------------------|--|--|--|---|---|--|--|------|------|
| Q5RJW9                | LOC495833 protein OS=Xenopus laevis                | ptcd1                                      |  |  |  | Y |   |  |  | TRUE | TRUE |
| Q5RJX2;CL4228Contig2  | Protein FAM171A1 OS=Xenopus laevis                 | fam171a1                                   |  |  |  | Y |   |  |  | TRUE | TRUE |
| Q5U235                | LOC495699 protein OS=Xenopus laevis                | nomo3                                      |  |  |  | Y | Y |  |  | TRUE | TRUE |
| Q5U248;CL1238Contig1  | LOC495689 protein OS=Xenopus laevis                | crebbp                                     |  |  |  | Y |   |  |  | TRUE | TRUE |
| Q5U258;CL22014Contig1 | Beta-1,3-galactosyl-O-glycosyl-glyco               | gcnt3                                      |  |  |  |   |   |  |  |      |      |
| Q5U484                | LOC495520 protein (Fragment) OS=Xenopus laevis     | LOC495520                                  |  |  |  |   |   |  |  |      |      |
| Q5U491                | LOC495515 protein (Fragment) OS=Xenopus laevis     | LOC495515                                  |  |  |  |   |   |  |  |      |      |
| Q5U498                | LOC495510 protein OS=Xenopus laevis                | nxpe2                                      |  |  |  |   |   |  |  |      |      |
| Q5U4I3                | Cyclin-D1-binding protein 1 homolog                | ccndbp1                                    |  |  |  |   |   |  |  |      |      |
| Q5U4L0;CL8653Contig1  | LOC100101274 protein OS=Xenopus laevis             | GN=LOC100101274 PE=2 SV=1 - [Q5U4L0_XENLA] |  |  |  |   |   |  |  |      |      |
| Q5U4L5                | LOC495501 protein OS=Xenopus laevis                | cers5                                      |  |  |  | Y |   |  |  | TRUE | TRUE |
| Q5U4N0                | LOC495463 protein (Fragment) OS=Xenopus laevis     | LOC495463                                  |  |  |  |   |   |  |  |      |      |
| Q5U4T2;CL2020Contig1  | LOC495440 protein OS=Xenopus laevis                | atp2a3                                     |  |  |  |   | Y |  |  | TRUE | TRUE |
| Q5U4V0                | LOC495494 protein OS=Xenopus laevis                | tnpo1                                      |  |  |  |   | Y |  |  | TRUE | TRUE |
| Q5U4V6                | LOC397931 protein OS=Xenopus laevis                | GN=LOC397931 PE=2 SV=1 - [Q5U4V6_XENLA]    |  |  |  |   |   |  |  |      |      |
| Q5U4W0;CL2471Contig1  | Entpd4 protein OS=Xenopus laevis                   | entpd4                                     |  |  |  |   |   |  |  |      |      |
| Q5U4W7                | LOC495416 protein (Fragment) OS=Xenopus laevis     | LOC495416                                  |  |  |  |   |   |  |  |      |      |
| Q5U511                | LOC495400 protein OS=Xenopus laevis                | vapb                                       |  |  |  | Y |   |  |  | TRUE | TRUE |
| Q5U556;CL13826Contig1 | LOC495364 protein OS=Xenopus laevis                | mrpl12                                     |  |  |  |   |   |  |  |      |      |
| Q5U562                | LOC495358 protein OS=Xenopus laevis                | cib1                                       |  |  |  | Y |   |  |  | TRUE | TRUE |
| Q5U568                | LOC495352 protein OS=Xenopus laevis                | phax                                       |  |  |  | Y |   |  |  | TRUE | TRUE |
| Q5U576;CL11909Contig1 | LOC495345 protein OS=Xenopus laevis                | gpr85                                      |  |  |  |   |   |  |  |      |      |
| Q5U583;CL2706Contig1  | Probable glutathione peroxidase 8-f                | gpx8b                                      |  |  |  |   |   |  |  |      |      |
| Q5U592                | LOC495330 protein OS=Xenopus laevis                | olfm2                                      |  |  |  |   |   |  |  |      |      |
| Q5U5A2                | LOC495321 protein OS=Xenopus laevis                | OC495321                                   |  |  |  |   |   |  |  |      |      |
| Q5U5A3                | Immunoglobulin superfamily membe                   | igsf3                                      |  |  |  | Y |   |  |  | TRUE | TRUE |
| Q5U5A4                | LOC495319 protein OS=Xenopus laevis                | tubb3                                      |  |  |  | Y |   |  |  | TRUE | TRUE |
| Q5U5A6                | Notch-regulated ankyrin repeat-con                 | nrarp                                      |  |  |  |   |   |  |  |      |      |
| Q5U5C4;CL1634Contig2  | Pa2g4 protein OS=Xenopus laevis                    | pa2g4                                      |  |  |  | Y | Y |  |  | TRUE | TRUE |
| Q5XFZ8                | LOC495249 protein (Fragment) OS=Xenopus laevis     | LOC495249                                  |  |  |  |   |   |  |  |      |      |
| Q5XG13                | Putative uncharacterized protein OS=Xenopus laevis | PE=2 SV=1 - [Q5XG13_XENLA]                 |  |  |  |   |   |  |  |      |      |
| Q5XG51                | LOC495282 protein (Fragment) OS=Xenopus laevis     | LOC495282                                  |  |  |  |   |   |  |  |      |      |
| Q5XGK8                | LOC495278 protein OS=Xenopus laevis                | LOC495278                                  |  |  |  | Y |   |  |  | TRUE | TRUE |
| Q5XGQ1                | LOC495170 protein OS=Xenopus laevis                | GN=LOC495170 PE=2 SV=1 - [Q5XGQ1_XENLA]    |  |  |  |   |   |  |  |      |      |
| Q5XGQ2                | LOC495169 protein OS=Xenopus laevis                | pdia4                                      |  |  |  | Y |   |  |  | TRUE | TRUE |
| Q5XGQ8;CL9736Contig1  | LOC495164 protein OS=Xenopus laevis                | tprg1l                                     |  |  |  | Y |   |  |  | TRUE | TRUE |
| Q5XGR3;dsrrswapns_com | Peptidyl-prolyl cis-trans isomerase                | LOC495270                                  |  |  |  |   |   |  |  |      |      |
| Q5XGR8                | Beta-lactamase-like protein 2 OS=Xenopus laevis    | lactb2                                     |  |  |  | Y |   |  |  | TRUE | TRUE |
| Q5XGS8                | GTP-binding protein 1 OS=Xenopus laevis            | gtpbp1                                     |  |  |  | Y |   |  |  | TRUE | TRUE |
| Q5XGV1                | LOC398569 protein OS=Xenopus laevis                | anln                                       |  |  |  |   | Y |  |  | TRUE | TRUE |
| Q5XGW1;CL14714Contig1 | LOC495263 protein OS=Xenopus laevis                | atp5g1                                     |  |  |  | Y | Y |  |  | TRUE | TRUE |
| Q5XGW4;CL2418Contig2  | T-complex protein 1 subunit delta O                | cct4                                       |  |  |  | Y |   |  |  | TRUE | TRUE |
| Q5XGW7                | Cbp/p300-interacting transactivator                | cited2                                     |  |  |  | Y |   |  |  | TRUE | TRUE |
| Q5XGY6                | LOC495114 protein OS=Xenopus laevis                | fhod1                                      |  |  |  | Y |   |  |  | TRUE | TRUE |
| Q5XGZ4                | LOC779025 protein (Fragment) OS=Xenopus laevis     | LOC779025                                  |  |  |  |   |   |  |  |      |      |
| Q5XGZ5                | LOC495108 protein OS=Xenopus laevis                | snx18                                      |  |  |  | Y |   |  |  | TRUE | TRUE |
| Q5XH03;dsrrswapns_com | Erlin-2-A OS=Xenopus laevis                        | GN=erlin2                                  |  |  |  |   |   |  |  |      |      |
| Q5XH25                | Malic enzyme OS=Xenopus laevis                     | me2                                        |  |  |  | Y |   |  |  | TRUE | TRUE |
| Q5XH38;CL4330Contig2  | LOC495073 protein OS=Xenopus laevis                | ltnem184a                                  |  |  |  | Y |   |  |  | TRUE | TRUE |
| Q5XH63;CL3193Contig1  | LOC495055 protein OS=Xenopus laevis                | LOC495055                                  |  |  |  |   |   |  |  |      |      |
| Q5XH69                | LOC495053 protein (Fragment) OS=Xenopus laevis     | LOC495053                                  |  |  |  |   |   |  |  |      |      |
| Q5XHC7                | LOC495037 protein OS=Xenopus laevis                | GN=LOC495037 PE=2 SV=1 - [Q5XHC7_XENLA]    |  |  |  |   |   |  |  |      |      |
| Q5XHD4                | LOC495031 protein OS=Xenopus laevis                | c1gall1c1                                  |  |  |  | Y |   |  |  | TRUE | TRUE |
| Q5XHE2;CL15613Contig1 | LOC495025 protein OS=Xenopus laevis                | uchl3                                      |  |  |  |   |   |  |  |      |      |
| Q5XHE3                | LOC495024 protein OS=Xenopus laevis                | cdh13                                      |  |  |  |   |   |  |  |      |      |
| Q5XHE4                | LOC495023 protein OS=Xenopus laevis                | paqr4                                      |  |  |  | Y |   |  |  | TRUE | TRUE |
| Q5XHE6                | LOC495021 protein OS=Xenopus laevis                | OC495021                                   |  |  |  |   |   |  |  |      |      |
| Q5XHG7;CL1310Contig3  | LOC398345 protein OS=Xenopus laevis                | furin                                      |  |  |  |   |   |  |  |      |      |
| Q5XHH4                | LOC494998 protein OS=Xenopus laevis                | shkbp1                                     |  |  |  |   | Y |  |  | TRUE | TRUE |
| Q5XHJ3                | Cellular tumor antigen p53 OS=Xenopus laevis       | tp53                                       |  |  |  | Y |   |  |  | TRUE | TRUE |
| Q5XHJ8;CL2211Contig2  | LOC397895 protein OS=Xenopus laevis                | gsn                                        |  |  |  | Y |   |  |  | TRUE | TRUE |
| Q5XHK2;CL84Contig4    | 14-3-3 protein beta/alpha-A OS=Xenopus laevis      | ywhab                                      |  |  |  | Y | Y |  |  | TRUE | TRUE |
| Q5XHM7;CL5748Contig2  | Carbohydrate sulfotransferase 12 O                 | chst12                                     |  |  |  | Y |   |  |  | TRUE | TRUE |
| Q5XK85                | Uncharacterized protein KIAA0556                   | kiaa0556                                   |  |  |  | Y |   |  |  | TRUE | TRUE |
| Q5XK98;dsrrswapns_com | LOC494864 protein OS=Xenopus laevis                | msl3                                       |  |  |  | Y |   |  |  | TRUE | TRUE |
| Q63ZG6;CL22Contig15   | Phosphorylase OS=Xenopus laevis                    | pygl                                       |  |  |  | Y | Y |  |  | TRUE | TRUE |
| Q63ZJ1                | LOC494796 protein OS=Xenopus laevis                | suclg1                                     |  |  |  | Y |   |  |  | TRUE | TRUE |
| Q63ZK5                | LOC494824 protein (Fragment) OS=Xenopus laevis     | LOC494824                                  |  |  |  |   |   |  |  |      |      |
| Q63ZN2                | LOC445856 protein OS=Xenopus laevis                | vps13a                                     |  |  |  | Y |   |  |  | TRUE | TRUE |
| Q63ZN4                | LOC494770 protein OS=Xenopus laevis                | cbx6                                       |  |  |  | Y |   |  |  | TRUE | TRUE |
| Q63ZS6                | LOC494740 protein OS=Xenopus laevis                | rpp30                                      |  |  |  | Y | Y |  |  | TRUE | TRUE |
| Q63ZU5                | LOC494732 protein OS=Xenopus laevis                | tsc22d1                                    |  |  |  | Y |   |  |  | TRUE | TRUE |
| Q63ZU7                | LOC494730 protein OS=Xenopus laevis                | gcc1                                       |  |  |  | Y |   |  |  | TRUE | TRUE |
| Q640C3                | LOC494728 protein OS=Xenopus laevis                | umps                                       |  |  |  | Y |   |  |  | TRUE | TRUE |
| Q640C5                | D-dopachrome decarboxylase-B OS=Xenopus laevis     | ddt                                        |  |  |  | Y |   |  |  | TRUE | TRUE |
| Q640C8;CL4522Contig1  | LOC494703 protein OS=Xenopus laevis                | GN=LOC494703 PE=2 SV=1 - [Q640C8_XENLA]    |  |  |  | Y |   |  |  | TRUE | TRUE |
| Q640D9                | Elongation factor 1-alpha OS=Xenopus laevis        | LOC494720                                  |  |  |  |   |   |  |  |      |      |
| Q640F4;CL20343Contig1 | LOC494684 protein OS=Xenopus laevis                | GN=LOC494684 PE=2 SV=1 - [Q640F4_XENLA]    |  |  |  |   |   |  |  |      |      |
| Q640G5                | LOC494678 protein (Fragment) OS=Xenopus laevis     | LOC494678                                  |  |  |  |   |   |  |  |      |      |
| Q640H2                | LOC494715 protein OS=Xenopus laevis                | scp2                                       |  |  |  | Y |   |  |  | TRUE | TRUE |
| Q640H4                | LOC494673 protein OS=Xenopus laevis                | cth                                        |  |  |  | Y |   |  |  | TRUE | TRUE |
| Q640I9                | Lysine-specific demethylase 2B OS=Xenopus laevis   | kdm2b                                      |  |  |  |   |   |  |  |      |      |
| Q640J1                | LOC494661 protein OS=Xenopus laevis                | dhrs13                                     |  |  |  | Y |   |  |  | TRUE | TRUE |
| Q640V5                | MGC85351 protein OS=Xenopus laevis                 | mpste24                                    |  |  |  |   |   |  |  |      |      |
| Q640W9                | MGC84396 protein OS=Xenopus laevis                 | MGC84396                                   |  |  |  |   |   |  |  |      |      |
| Q640X7                | MGC84330 protein OS=Xenopus laevis                 | capns1                                     |  |  |  | Y |   |  |  | TRUE | TRUE |

|                       |                                                                                        |          |  |  |  |   |   |  |  |      |      |
|-----------------------|----------------------------------------------------------------------------------------|----------|--|--|--|---|---|--|--|------|------|
| Q640Z4                | MGC83916 protein OS=Xenopus la                                                         | mta1     |  |  |  | Y |   |  |  | TRUE | TRUE |
| Q641B0;CL3581Contig2  | Dmd protein OS=Xenopus laevis G                                                        | dmd.1    |  |  |  |   |   |  |  |      |      |
| Q641B9                | Actin-related protein 2/3 complex su                                                   | arpc5    |  |  |  | Y |   |  |  | TRUE | TRUE |
| Q641C5                | MGC82112 protein OS=Xenopus la                                                         | MGC82112 |  |  |  |   |   |  |  |      |      |
| Q641D4                | MGC82000 protein OS=Xenopus la                                                         | golm1    |  |  |  | Y |   |  |  | TRUE | TRUE |
| Q641D9;CL1834Contig5  | MGC81931 protein OS=Xenopus la                                                         | sec14i5  |  |  |  | Y |   |  |  | TRUE | TRUE |
| Q641F3                | Collagen alpha-1(XI) chain OS=Xe                                                       | col21a1  |  |  |  |   |   |  |  |      |      |
| Q641F7                | MGC81732 protein OS=Xenopus la                                                         | ppid     |  |  |  | Y |   |  |  | TRUE | TRUE |
| Q641G3;CL3592Contig3  | Cell division cycle and apoptosis reg                                                  | ccar1    |  |  |  |   |   |  |  |      |      |
| Q641G4                | Condensin-2 complex subunit H2 O                                                       | ncaph2   |  |  |  | Y |   |  |  | TRUE | TRUE |
| Q641G7                | Actin-related protein 2/3 complex su                                                   | arpc4    |  |  |  |   |   |  |  |      |      |
| Q641H7                | MGC81565 protein OS=Xenopus la                                                         | lats1    |  |  |  | Y |   |  |  | TRUE | TRUE |
| Q641I6                | LOC494638 protein OS=Xenopus laevis GN=LOC494638 PE=2 S                                |          |  |  |  | Y |   |  |  | TRUE | TRUE |
| Q641J8;CL811Contig3   | E3 ubiquitin-protein ligase RNF12-A                                                    | rnf12    |  |  |  |   |   |  |  |      |      |
| Q642N7                | LOC446968 protein (Fragment) OS=                                                       | OC446968 |  |  |  |   |   |  |  |      |      |
| Q642P2                | Protein dopey-2 OS=Xenopus laevis                                                      | dopey2   |  |  |  | Y |   |  |  | TRUE | TRUE |
| Q642S3                | MGC81229 protein OS=Xenopus la                                                         | tubgcp4  |  |  |  | Y |   |  |  | TRUE | TRUE |
| Q66IN2                | Glutamine and serine-rich protein 1                                                    | qser1    |  |  |  | Y |   |  |  | TRUE | TRUE |
| Q66IP6;CL2553Contig2  | MGC86305 protein OS=Xenopus la                                                         | fam168a  |  |  |  | Y |   |  |  | TRUE | TRUE |
| Q66IQ2                | MGC86228 protein OS=Xenopus la                                                         | ablim2   |  |  |  |   |   |  |  |      |      |
| Q66IS7                | MGC85220 protein OS=Xenopus la                                                         | fntb     |  |  |  | Y |   |  |  | TRUE | TRUE |
| Q66IS8;CL11862Contig1 | Transmembrane protein 177 OS=Xe                                                        | tmem177  |  |  |  | Y |   |  |  | TRUE | TRUE |
| Q66IT5                | MGC84699 protein OS=Xenopus la                                                         | sntg2    |  |  |  |   |   |  |  |      |      |
| Q66IV8;CL2891Contig1  | MGC84302 protein OS=Xenopus la                                                         | syn1     |  |  |  |   |   |  |  |      |      |
| Q66IX2                | MGC84231 protein OS=Xenopus la                                                         | psmd13   |  |  |  | Y |   |  |  | TRUE | TRUE |
| Q66IY6;CL4803Contig1  | MGC84052 protein OS=Xenopus la                                                         | psmd7    |  |  |  | Y | Y |  |  | TRUE | TRUE |
| Q66JZ2                | MGC83950 protein OS=Xenopus la                                                         | extl3    |  |  |  | Y |   |  |  | TRUE | TRUE |
| Q66J02                | MGC83799 protein OS=Xenopus la                                                         | MGC83799 |  |  |  |   |   |  |  |      |      |
| Q66J07;CL542Contig7   | MGC83563 protein OS=Xenopus la                                                         | nnt      |  |  |  | Y |   |  |  | TRUE | TRUE |
| Q66J16                | MGC83352 protein OS=Xenopus la                                                         | aldh7a1  |  |  |  | Y |   |  |  | TRUE | TRUE |
| Q66J37                | MGC82041 protein OS=Xenopus la                                                         | gba3     |  |  |  | Y |   |  |  | TRUE | TRUE |
| Q66J53;CL2807Contig1  | MGC81873 protein OS=Xenopus laevis GN=MGC81873 PE=2 S                                  |          |  |  |  | Y |   |  |  | TRUE | TRUE |
| Q66J54                | Solute carrier family 22 member 6-A                                                    | slc22a6  |  |  |  |   |   |  |  |      |      |
| Q66J64                | MGC81783 protein OS=Xenopus la                                                         | fam222b  |  |  |  |   |   |  |  |      |      |
| Q66J72                | MGC81721 protein OS=Xenopus la                                                         | pvr12    |  |  |  | Y |   |  |  | TRUE | TRUE |
| Q66J73                | MGC81714 protein OS=Xenopus la                                                         | abcf1    |  |  |  | Y | Y |  |  | TRUE | TRUE |
| Q66J90                | Histone-lysine N-methyltransferase                                                     | setd1b   |  |  |  | Y |   |  |  | TRUE | TRUE |
| Q66J92;CL2050Contig1  | Gtse1 protein OS=Xenopus laevis C                                                      | gtse1    |  |  |  | Y |   |  |  | TRUE | TRUE |
| Q66J94                | MGC81570 protein OS=Xenopus la                                                         | asl      |  |  |  | Y |   |  |  | TRUE | TRUE |
| Q66JA4                | MGC81147 protein OS=Xenopus la                                                         | MGC81147 |  |  |  |   |   |  |  |      |      |
| Q66JA7;CL1690Contig2  | Pdha1-b protein OS=Xenopus laevis                                                      | pdha1    |  |  |  | Y |   |  |  | TRUE | TRUE |
| Q66KF0;CL6164Contig1  | MGC86497 protein OS=Xenopus la                                                         | ppp1r13l |  |  |  | Y | Y |  |  | TRUE | TRUE |
| Q66KG2                | LOC446299 protein (Fragment) OS=                                                       | OC446299 |  |  |  |   |   |  |  |      |      |
| Q66KI6;CL1079Contig4  | Pum1-A protein OS=Xenopus laevis                                                       | pum1     |  |  |  | Y |   |  |  | TRUE | TRUE |
| Q66KN2                | MGC85584 protein OS=Xenopus la                                                         | atp5j2   |  |  |  | Y |   |  |  | TRUE | TRUE |
| Q66KN4;CL12856Contig1 | Mitochondrial NADH dehydrogenasi                                                       | ndufa13  |  |  |  |   |   |  |  |      |      |
| Q66KP4                | MGC85561 protein OS=Xenopus la                                                         | uros     |  |  |  | Y |   |  |  | TRUE | TRUE |
| Q66KP7;CL5026Contig1  | MGC85550 protein OS=Xenopus la                                                         | rps28p9  |  |  |  | Y |   |  |  | TRUE | TRUE |
| Q66KQ7                | MGC85526 protein OS=Xenopus la                                                         | asb5     |  |  |  |   |   |  |  | TRUE | TRUE |
| Q66KR0                | LOC446923 protein (Fragment) OS=Xenopus laevis GN=LOC446923 PE=2 SV=1 - [Q66KR0_XENLA] |          |  |  |  |   |   |  |  |      |      |
| Q66KR8;CL712Contig1   | MGC85505 protein OS=Xenopus la                                                         | utp11l   |  |  |  | Y |   |  |  | TRUE | TRUE |
| Q66KT0                | MGC85462 protein OS=Xenopus la                                                         | rmls     |  |  |  | Y |   |  |  | TRUE | TRUE |
| Q66KT2                | MGC85457 protein OS=Xenopus la                                                         | ndufs8   |  |  |  | Y |   |  |  | TRUE | TRUE |
| Q66KU5;TC432828 UniRe | MGC85428 protein OS=Xenopus la                                                         | rpl36a   |  |  |  | Y |   |  |  | TRUE | TRUE |
| Q66KV2                | MGC85404 protein OS=Xenopus la                                                         | rpl38    |  |  |  | Y |   |  |  | TRUE | TRUE |
| Q66KV6;CL1Contig276   | LOC100101273 protein OS=Xenopi                                                         | rpl28    |  |  |  | Y |   |  |  | TRUE | TRUE |
| Q66KW1;CL1655Contig4  | MGC85384 protein OS=Xenopus la                                                         | rpl29    |  |  |  | Y | Y |  |  | TRUE | TRUE |
| Q66KW5                | MGC85374 protein OS=Xenopus la                                                         | rpl32    |  |  |  |   |   |  |  |      |      |
| Q66KX3                | MGC85348 protein OS=Xenopus la                                                         | rpl23a   |  |  |  | Y | Y |  |  | TRUE | TRUE |
| Q66KY6;CL384Contig8   | MGC85310 protein OS=Xenopus la                                                         | rpl11    |  |  |  | Y | Y |  |  | TRUE | TRUE |
| Q66KY9                | MGC85306 protein OS=Xenopus la                                                         | atp5d    |  |  |  | Y |   |  |  | TRUE | TRUE |
| Q66KZ5                | MGC85294 protein OS=Xenopus laevis GN=MGC85294 PE=2 SV=1 - [Q66KZ5_XENLA]              |          |  |  |  |   |   |  |  |      |      |
| Q66KZ8                | Glutathione S-transferase (Fragmer                                                     | OC446920 |  |  |  |   |   |  |  |      |      |
| Q66L05                | MGC85264 protein OS=Xenopus la                                                         | prss3    |  |  |  |   |   |  |  |      |      |
| Q66L23                | MGC85232 protein OS=Xenopus la                                                         | rpl24    |  |  |  | Y |   |  |  | TRUE | TRUE |
| Q66L24                | MGC85230 protein OS=Xenopus la                                                         | atp5l    |  |  |  | Y |   |  |  | TRUE | TRUE |
| Q67FQ3                | Low density lipoprotein receptor ada                                                   | ldlrp1   |  |  |  | Y | Y |  |  | TRUE | TRUE |
| Q68A89                | Proteasome subunit alpha type (Fra                                                     | psma     |  |  |  |   |   |  |  |      |      |
| Q68A89;CL5945Contig2  | Proteasome subunit alpha type (Fra                                                     | psma     |  |  |  |   |   |  |  |      |      |
| Q68EX4                | Proteasome subunit beta type OS=)                                                      | psmb7    |  |  |  | Y |   |  |  | TRUE | TRUE |
| Q68EY5                | ATP synthase subunit alpha OS=Xe                                                       | atp5a1   |  |  |  | Y |   |  |  | TRUE | TRUE |
| Q68F13                | MGC82958 protein OS=Xenopus la                                                         | sucla2   |  |  |  | Y |   |  |  | TRUE | TRUE |
| Q68F29                | Vacuolar protein sorting-associated                                                    | vps26b   |  |  |  | Y |   |  |  | TRUE | TRUE |
| Q68F30                | MGC82115 protein OS=Xenopus la                                                         | alas2    |  |  |  | Y |   |  |  | TRUE | TRUE |
| Q68F32;CL3294Contig2  | MGC81977 protein OS=Xenopus la                                                         | arhgdig  |  |  |  | Y | Y |  |  | TRUE | TRUE |
| Q68F42                | MGC81821 protein OS=Xenopus la                                                         | dpyd     |  |  |  | Y |   |  |  | TRUE | TRUE |
| Q68F13                | D-dopachrome decarboxylase-A OS                                                        | ddt      |  |  |  | Y |   |  |  | TRUE | TRUE |
| Q68FJ1                | ATP synthase-coupling factor 6, mit                                                    | MGC86324 |  |  |  |   |   |  |  |      |      |
| Q68FJ5                | MGC86218 protein OS=Xenopus la                                                         | pdhx     |  |  |  | Y |   |  |  | TRUE | TRUE |
| Q68FK6                | MGC82138 protein OS=Xenopus la                                                         | arfgap2  |  |  |  |   |   |  |  |      |      |
| Q68FK7;CL11073Contig1 | MGC81942 protein OS=Xenopus la                                                         | rufy3    |  |  |  | Y |   |  |  | TRUE | TRUE |
| Q6AX29                | MGC86330 protein OS=Xenopus la                                                         | kcnj1    |  |  |  | Y |   |  |  | TRUE | TRUE |
| Q6AX77                | XK-related protein (Fragment) OS=)                                                     | OC446266 |  |  |  |   |   |  |  |      |      |
| Q6AX83                | MGC82093 protein OS=Xenopus la                                                         | lars     |  |  |  | Y |   |  |  | TRUE | TRUE |
| Q6AXA7                | MGC80263 protein OS=Xenopus la                                                         | prpf6    |  |  |  |   |   |  |  |      |      |
| Q6AXB3;CL3237Contig1  | MGC79128 protein OS=Xenopus la                                                         | shmt2    |  |  |  | Y | Y |  |  | TRUE | TRUE |

|                       |                                                                               |           |  |   |  |   |   |  |      |      |
|-----------------------|-------------------------------------------------------------------------------|-----------|--|---|--|---|---|--|------|------|
| Q6AZH2                | SIPA1L1 protein (Fragment) OS=Xenopus laevis                                  | sipa111   |  |   |  | Y |   |  | TRUE | TRUE |
| Q6AZH3                | CHML protein (Fragment) OS=Xenopus laevis                                     | chml      |  |   |  |   |   |  |      |      |
| Q6AZI4                | LOC446231 protein (Fragment) OS=Xenopus laevis                                | ube2i3    |  |   |  | Y |   |  | TRUE | TRUE |
| Q6AZJ0                | Glutamate dehydrogenase OS=Xenopus laevis                                     | glud1     |  |   |  | Y |   |  | TRUE | TRUE |
| Q6AZJ6                | Fascin (Fragment) OS=Xenopus laevis                                           | fscn1     |  |   |  | Y |   |  | TRUE | TRUE |
| Q6AZJ9                | 40S ribosomal protein S21 OS=Xenopus laevis                                   | rps21     |  |   |  | Y |   |  | TRUE | TRUE |
| Q6AZL6;CL367Contig5   | LOC444845 protein OS=Xenopus laevis GN=LOC444845 PE=2 SV=1 - [Q6AZL6_XENLA]   |           |  |   |  |   |   |  |      |      |
| Q6AZL7                | MGC86356 protein OS=Xenopus laevis                                            | rps26     |  |   |  | Y |   |  | TRUE | TRUE |
| Q6AZL9                | MGC86316 protein OS=Xenopus laevis                                            | rps23     |  | Y |  | Y |   |  | TRUE | TRUE |
| Q6AZM8                | Sh3glb2-prov protein OS=Xenopus laevis                                        | sh3glb2   |  |   |  |   |   |  |      |      |
| Q6AZN8;CL5215Contig3  | Zinc transporter 6-A OS=Xenopus laevis                                        | slc30a6-a |  |   |  | Y |   |  | TRUE | TRUE |
| Q6AZP8;CL4086Contig1  | MGC82549 protein OS=Xenopus laevis GN=MGC82549 PE=2 SV=1 - [Q6AZP8_XENLA]     |           |  |   |  |   |   |  |      |      |
| Q6AZS1;CL1Contig38    | Histone H2A OS=Xenopus laevis                                                 | histh2ad  |  |   |  |   |   |  |      |      |
| Q6AZS3                | Uty-prov protein OS=Xenopus laevis                                            | kdm6a     |  |   |  | Y |   |  | TRUE | TRUE |
| Q6AZU4                | MGC79131 protein OS=Xenopus laevis                                            | MGC79131  |  |   |  |   |   |  |      |      |
| Q6AZV1                | Hsp90beta OS=Xenopus laevis GN=hsp90ab1                                       |           |  |   |  | Y |   |  | TRUE | TRUE |
| Q6AZV2;CL1314Contig1  | Gcdh-prov protein OS=Xenopus laevis                                           | gcdh      |  |   |  |   |   |  |      |      |
| Q6AZV3;CL1Contig1336  | MGC78885 protein OS=Xenopus laevis                                            | rpl17     |  | Y |  | Y |   |  | TRUE | TRUE |
| Q6B4U5;CL4491Contig1  | Malate dehydrogenase OS=Xenopus laevis                                        | mdh2      |  | Y |  | Y |   |  | TRUE | TRUE |
| Q6DCC2                | Pex11b-prov protein OS=Xenopus laevis                                         | pex11b    |  |   |  | Y |   |  | TRUE | TRUE |
| Q6DCD1                | FGGY carbohydrate kinase domain                                               | fggy      |  |   |  |   |   |  |      |      |
| Q6DCF9;CL15Contig5    | Annexin OS=Xenopus laevis GN=anna7                                            | anna7     |  |   |  | Y |   |  | TRUE | TRUE |
| Q6DCG7                | Putative uncharacterized protein OS=Xenopus laevis PE=2 SV=1 - [Q6DCG7_XENLA] |           |  |   |  |   |   |  |      |      |
| Q6DCG8;CL1244Contig3  | Tnpo3-prov protein OS=Xenopus laevis                                          | tnpo3     |  |   |  | Y |   |  | TRUE | TRUE |
| Q6DCI2                | XCaspase-7 protein OS=Xenopus laevis                                          | casp7     |  |   |  | Y |   |  | TRUE | TRUE |
| Q6DCJ9                | Gdi2-prov protein OS=Xenopus laevis                                           | gdi1      |  |   |  |   |   |  |      |      |
| Q6DCL1                | MGC82412 protein OS=Xenopus laevis                                            | bpnt1     |  |   |  | Y |   |  | TRUE | TRUE |
| Q6DCL5;CL4445Contig2  | E3 ubiquitin-protein ligase HACE1 C                                           | hace1     |  |   |  | Y |   |  | TRUE | TRUE |
| Q6DCL6;CL7918Contig1  | Protein FAM69A OS=Xenopus laevis                                              | fam69a    |  |   |  | Y |   |  | TRUE | TRUE |
| Q6DCM4                | Spon2-prov protein OS=Xenopus laevis                                          | spon2     |  |   |  |   |   |  |      |      |
| Q6DCM5                | Ppp4r1-prov protein OS=Xenopus laevis                                         | ppp4r1    |  |   |  |   |   |  |      |      |
| Q6DCM8                | Hadh2-prov protein OS=Xenopus laevis                                          | hsd17b10  |  |   |  | Y | Y |  | TRUE | TRUE |
| Q6DCS5                | MGC80849 protein OS=Xenopus laevis                                            | MGC80849  |  |   |  |   |   |  |      |      |
| Q6DCS9                | MGC80838 protein OS=Xenopus laevis                                            | ptgr1.2   |  |   |  | Y |   |  | TRUE | TRUE |
| Q6DCT2                | UPF0668 protein C10orf76 homolog                                              | c10orf76  |  |   |  | Y |   |  | TRUE | TRUE |
| Q6DCT5;CL7695Contig1  | MGC80785 protein OS=Xenopus laevis                                            | aldh2     |  | Y |  | Y |   |  | TRUE | TRUE |
| Q6DCT7                | MGC80781 protein OS=Xenopus laevis                                            | arhgap30  |  |   |  | Y |   |  | TRUE | TRUE |
| Q6DCU8                | LOC397741 protein OS=Xenopus laevis                                           | LOC397741 |  |   |  |   |   |  |      |      |
| Q6DCU9                | Putative uncharacterized protein OS=Xenopus laevis                            | itga2b.1  |  |   |  |   |   |  |      |      |
| Q6DCY9;CL8574Contig1  | HAUS augmin-like complex subunit                                              | haus3     |  |   |  | Y |   |  | TRUE | TRUE |
| Q6DD02                | Nek8 protein OS=Xenopus laevis                                                | nek8      |  |   |  | Y |   |  | TRUE | TRUE |
| Q6DD25                | UBXD2 protein (Fragment) OS=Xenopus laevis                                    | ubxd2     |  |   |  |   |   |  |      |      |
| Q6DD48;CL3329Contig2  | Pgk2 protein OS=Xenopus laevis                                                | pgk1      |  |   |  | Y |   |  | TRUE | TRUE |
| Q6DD55;CL437Contig2   | P4hb protein OS=Xenopus laevis                                                | p4hb      |  | Y |  | Y |   |  | TRUE | TRUE |
| Q6DD58;CL18845Contig1 | Mec-12 protein OS=Xenopus laevis                                              | tuba4b    |  |   |  | Y |   |  | TRUE | TRUE |
| Q6DD68                | LOC397850 protein OS=Xenopus laevis                                           | LOC397850 |  |   |  |   |   |  |      |      |
| Q6DD71                | ERO1-like protein alpha OS=Xenopus laevis                                     | ero1l     |  |   |  | Y |   |  | TRUE | TRUE |
| Q6DDF2                | Acad9-prov protein OS=Xenopus laevis                                          | acad9     |  |   |  | Y |   |  | TRUE | TRUE |
| Q6DDF7                | MGC84593 protein OS=Xenopus laevis                                            | atp13a4   |  |   |  | Y |   |  | TRUE | TRUE |
| Q6DDF9                | MGC84581 protein OS=Xenopus laevis GN=MGC84581 PE=2 SV=1 - [Q6DDF9_XENLA]     |           |  |   |  |   |   |  |      |      |
| Q6DDG1                | LOC445874 protein (Fragment) OS=Xenopus laevis                                | LOC445874 |  |   |  |   |   |  |      |      |
| Q6DDG3                | Pik4ca-prov protein OS=Xenopus laevis                                         | pi4ka     |  |   |  | Y |   |  | TRUE | TRUE |
| Q6DDH9                | Eva1-prov protein OS=Xenopus laevis                                           | mpz12     |  |   |  | Y |   |  | TRUE | TRUE |
| Q6DDI6                | WD repeat-containing protein 67 OS=Xenopus laevis                             | wdr67     |  |   |  | Y |   |  | TRUE | TRUE |
| Q6DDK5                | Acetolactate synthase-like protein C                                          | ilvl3     |  |   |  | Y |   |  | TRUE | TRUE |
| Q6DDM0                | MGC83329 protein OS=Xenopus laevis                                            | MGC83329  |  |   |  |   |   |  |      |      |
| Q6DDM4                | Apoptosis inhibitor 5-A OS=Xenopus laevis                                     | api5a     |  |   |  | Y |   |  | TRUE | TRUE |
| Q6DDM7;CL6675Contig1  | Acadl-prov protein OS=Xenopus laevis                                          | acadl     |  |   |  | Y |   |  | TRUE | TRUE |
| Q6DDM8;CL8350Contig1  | MGC83152 protein OS=Xenopus laevis                                            | zfand2a   |  |   |  | Y |   |  | TRUE | TRUE |
| Q6DDN7                | MGC82654 protein OS=Xenopus laevis                                            | hacl1     |  |   |  | Y |   |  | TRUE | TRUE |
| Q6DDN9                | Cbs-prov protein OS=Xenopus laevis                                            | cbs       |  |   |  |   |   |  |      |      |
| Q6DDP5                | Ola1 protein OS=Xenopus laevis                                                | ola1      |  |   |  |   |   |  |      |      |
| Q6DDP7                | Uncharacterized protein OS=Xenopus laevis PE=2 SV=1 - [Q6DDP7_XENLA]          |           |  |   |  |   |   |  |      |      |
| Q6DDQ3                | Anoctamin OS=Xenopus laevis GN=ano5                                           | ano5      |  |   |  | Y |   |  | TRUE | TRUE |
| Q6DDQ5                | Protein phosphatase 1 regulatory subunit 1                                    | ppp1r3c   |  |   |  | Y |   |  | TRUE | TRUE |
| Q6DDR6                | LOC445863 protein (Fragment) OS=Xenopus laevis                                | LOC445863 |  |   |  |   |   |  |      |      |
| Q6DDV2                | Znf384-prov protein OS=Xenopus laevis                                         | znf384    |  |   |  | Y |   |  | TRUE | TRUE |
| Q6DDW1                | MGC81675 protein OS=Xenopus laevis                                            | txn1      |  |   |  |   |   |  |      |      |
| Q6DDX0;CL2427Contig1  | Cry2 protein OS=Xenopus laevis                                                | cry2      |  |   |  | Y |   |  | TRUE | TRUE |
| Q6DDX4                | LOC445857 protein (Fragment) OS=Xenopus laevis                                | LOC445857 |  |   |  |   |   |  |      |      |
| Q6DDZ2                | MGC81354 protein OS=Xenopus laevis                                            | tom1      |  |   |  | Y |   |  | TRUE | TRUE |
| Q6DDZ4                | LOC398498 protein OS=Xenopus laevis                                           | LOC398498 |  |   |  |   |   |  |      |      |
| Q6DE12;CL5192Contig1  | M6prbp1-prov protein OS=Xenopus laevis                                        | m6prbp1   |  |   |  |   |   |  |      |      |
| Q6DE30                | Oat-prov protein OS=Xenopus laevis                                            | oat.1     |  |   |  |   | Y |  | TRUE | TRUE |
| Q6DE33;CL4688Contig1  | Uqcrc2 protein OS=Xenopus laevis                                              | uqcrc2    |  |   |  | Y |   |  | TRUE | TRUE |
| Q6DE48;CL1839Contig1  | Rbbp5-prov protein OS=Xenopus laevis                                          | rbbp5     |  |   |  | Y |   |  | TRUE | TRUE |
| Q6DE60;CL1365Contig1  | Adenylyl cyclase-associated protein                                           | cap1      |  |   |  | Y |   |  | TRUE | TRUE |
| Q6DE62                | LOC398863 protein OS=Xenopus laevis                                           | hspa4     |  |   |  |   |   |  |      |      |
| Q6DE67                | Putative uncharacterized protein OS=Xenopus laevis PE=2 SV=1 - [Q6DE67_XENLA] |           |  |   |  |   |   |  |      |      |
| Q6DE73;CL13437Contig1 | 2-oxoglutarate and iron-dependent oxidoreductase                              | ogfod1    |  |   |  | Y |   |  | TRUE | TRUE |
| Q6DE96                | Protein IWS1 homolog A OS=Xenopus laevis                                      | iws1      |  |   |  |   |   |  |      |      |
| Q6DE98;CL4343Contig1  | Gyg1-prov protein OS=Xenopus laevis                                           | gyg1      |  |   |  | Y |   |  | TRUE | TRUE |
| Q6DEA4;CL3873Contig1  | MGC79068 protein OS=Xenopus laevis                                            | pdia6     |  |   |  | Y |   |  | TRUE | TRUE |
| Q6DEA5;CL11630Contig1 | Pex26-prov protein OS=Xenopus laevis                                          | pex26     |  |   |  | Y |   |  | TRUE | TRUE |
| Q6DEB3;CL2313Contig1  | MGC79025 protein OS=Xenopus laevis                                            | phb2      |  | Y |  | Y |   |  | TRUE | TRUE |
| Q6DEB9                | LOC445848 protein (Fragment) OS=Xenopus laevis                                | LOC445848 |  |   |  |   |   |  |      |      |

|                       |                                                                                 |           |  |   |   |   |  |      |      |
|-----------------------|---------------------------------------------------------------------------------|-----------|--|---|---|---|--|------|------|
| Q6DEC8;CL1892Contig1  | MGC78939 protein OS=Xenopus la                                                  | st13      |  |   | Y |   |  | TRUE | TRUE |
| Q6DEC9;CL9001Contig1  | D-tyrosyl-tRNA(Tyr) deacylase OS=                                               | dtd1      |  |   | Y |   |  | TRUE | TRUE |
| Q6DF69                | LOC445837 protein (Fragment) OS=                                                | OC445837  |  |   |   |   |  |      |      |
| Q6DF71                | MGC84640 protein OS=Xenopus la                                                  | znf484    |  |   | Y |   |  | TRUE | TRUE |
| Q6DF73                | Fbxo11-prov protein OS=Xenopus la                                               | fbxo11    |  |   | Y |   |  | TRUE | TRUE |
| Q6DFA3                | Rnaset2-prov protein OS=Xenopus                                                 | rnaset2   |  |   | Y |   |  | TRUE | TRUE |
| Q6DFC7                | LOC445830 protein (Fragment) OS=                                                | OC445830  |  |   |   |   |  |      |      |
| Q6DFF0;CL7424Contig1  | MGC83705 protein OS=Xenopus la                                                  | MGC83705  |  |   |   |   |  |      |      |
| Q6DFF2                | Brd4-prov protein OS=Xenopus lae                                                | brd4      |  |   | Y |   |  | TRUE | TRUE |
| Q6DFG3;TC413472       | MGC83673 protein OS=Xenopus la                                                  | MGC83673  |  |   |   |   |  |      |      |
| Q6DFG4;CL2111Contig1  | MGC83457 protein OS=Xenopus la                                                  | ephb3     |  |   | Y |   |  | TRUE | TRUE |
| Q6DFI0                | MGC83110 protein OS=Xenopus la                                                  | MGC83110  |  |   |   |   |  |      |      |
| Q6DFI3                | Tst-prov protein OS=Xenopus laevis                                              | mpst      |  |   | Y |   |  | TRUE | TRUE |
| Q6DFJ6                | Serine/threonine-protein kinase TBK                                             | tbk1      |  |   | Y |   |  | TRUE | TRUE |
| Q6DFK1                | Pex12-prov protein OS=Xenopus la                                                | pex12     |  |   | Y |   |  | TRUE | TRUE |
| Q6DFK4;CL10561Contig1 | MGC81344 protein OS=Xenopus la                                                  | etaa1     |  |   | Y |   |  | TRUE | TRUE |
| Q6DFL2;CL4663Contig1  | Biorientation of chromosomes in cel                                             | bod1      |  |   | Y |   |  | TRUE | TRUE |
| Q6DFL3                | Ppp2r5e-prov protein OS=Xenopus                                                 | ppp2r5b   |  |   |   |   |  |      |      |
| Q6DFT8;CL48Contig18   | Bcap31 protein OS=Xenopus laevis                                                | bcap31    |  |   | Y |   |  | TRUE | TRUE |
| Q6DJF7                | 60S ribosomal protein L6 OS=Xeno                                                | rpl6      |  |   |   |   |  |      |      |
| Q6DJG5                | MGC84307 protein OS=Xenopus la                                                  | cox4i2    |  | Y |   |   |  | TRUE | TRUE |
| Q6DJH9;dsrrswapns_com | MGC83433 protein OS=Xenopus la                                                  | smg7      |  |   | Y |   |  | TRUE | TRUE |
| Q6DJI0                | 40S ribosomal protein S8 OS=Xeno                                                | rps8      |  |   | Y |   |  | TRUE | TRUE |
| Q6DJI6                | Putative uncharacterized protein OS=Xenopus laevis PE=4 SV=1 - [Q6DJI6_XENLA]   |           |  |   |   |   |  |      |      |
| Q6DJJ1;zeinaSSns_comp | MGC82151 protein OS=Xenopus la                                                  | rps25     |  | Y | Y |   |  | TRUE | TRUE |
| Q6DJJ7;CL22Contig4    | MGC82136 protein OS=Xenopus la                                                  | MGC82136  |  |   |   |   |  |      |      |
| Q6DJJ8                | Polr3c-prov protein OS=Xenopus la                                               | polr3c    |  |   | Y |   |  | TRUE | TRUE |
| Q6DJK5;CL3918Contig1  | CNDP dipeptidase 2 (Metallopeptid                                               | cndp2     |  |   | Y |   |  | TRUE | TRUE |
| Q6DJL3                | MGC82066 protein OS=Xenopus la                                                  | rf139     |  |   | Y |   |  | TRUE | TRUE |
| Q6DJL4;CL12647Contig1 | MGC82059 protein OS=Xenopus la                                                  | atpif1    |  | Y | Y |   |  | TRUE | TRUE |
| Q6DJM2                | Phosphatidate cytidyltransferase,                                               | tamm41    |  |   |   |   |  |      |      |
| Q6DJN5;dsrrswapns_com | 60S ribosomal protein L13 OS=Xen                                                | rpl13     |  |   |   |   |  |      |      |
| Q6DJP0;CL2037Contig1  | LOC100137615 protein OS=Xenopi                                                  | gclc      |  |   | Y |   |  | TRUE | TRUE |
| Q6DJP1                | LOC443721 protein (Fragment) OS=                                                | ctsd      |  |   | Y |   |  | TRUE | TRUE |
| Q6DJP2                | MGC81911 protein OS=Xenopus la                                                  | ech1      |  |   | Y |   |  | TRUE | TRUE |
| Q6DJQ0                | Putative uncharacterized protein OS=Xenopus laevis PE=2 SV=1 - [Q6DJQ0_XENLA]   |           |  |   |   |   |  |      |      |
| Q6DJQ1;CL8372Contig1  | MGC81800 protein OS=Xenopus la                                                  | mgst3     |  |   | Y |   |  | TRUE | TRUE |
| Q6DKA5                | MGC84756 protein OS=Xenopus la                                                  | hsd17b11  |  |   | Y |   |  | TRUE | TRUE |
| Q6DKB9                | MGC84375 protein OS=Xenopus la                                                  | aco2      |  |   | Y |   |  | TRUE | TRUE |
| Q6DKC0;CL24Contig3    | Erlin-2-B OS=Xenopus laevis GN=e                                                | erlin2    |  |   |   |   |  |      |      |
| Q6DKC6                | MGC84147 protein OS=Xenopus la                                                  | MGC84147  |  |   |   |   |  |      |      |
| Q6DKD7                | Coatomer subunit gamma-2 OS=Xe                                                  | copg2     |  |   | Y |   |  | TRUE | TRUE |
| Q6DKE3;CL40282Contig1 | Histone H2A OS=Xenopus laevis G                                                 | hist1h2aa |  |   | Y |   |  | TRUE | TRUE |
| Q6DKM0                | MGC83065 protein OS=Xenopus la                                                  | cand1     |  |   | Y |   |  | TRUE | TRUE |
| Q6DKM7                | LOC443571 protein (Fragment) OS=                                                | OC443571  |  |   |   |   |  |      |      |
| Q6E2P0                | Urocortin 3 OS=Xenopus laevis GN                                                | ucn3      |  | Y | Y |   |  | TRUE | TRUE |
| Q6EAN5                | Transcription factor OS=Xenopus la                                              | sall2     |  |   | Y |   |  | TRUE | TRUE |
| Q6EE53                | 40S ribosomal protein S8 (Fragmen                                               | rps8      |  | Y | Y |   |  | TRUE | TRUE |
| Q6EE56                | Aminolevulinic acid synthase 1 (Fra                                             | alas1     |  |   | Y |   |  | TRUE | TRUE |
| Q6GLK7                | MGC84770 protein OS=Xenopus la                                                  | psmd9     |  |   | Y | Y |  | TRUE | TRUE |
| Q6GLL5;CL9439Contig2  | MGC84748 protein OS=Xenopus la                                                  | fgl1      |  |   |   |   |  |      |      |
| Q6GLN2                | MGC84671 protein OS=Xenopus la                                                  | wasf1     |  |   | Y |   |  | TRUE | TRUE |
| Q6GLN6                | MGC84462 protein OS=Xenopus laevis GN=MGC84462 PE=2 SV=1 - [Q6GLN6_XENLA]       |           |  |   |   |   |  |      |      |
| Q6GLQ1                | Serpin B5 OS=Xenopus laevis GN=                                                 | serpinb5  |  |   |   |   |  |      |      |
| Q6GLS2                | MGC84319 protein OS=Xenopus la                                                  | tcp1111   |  |   | Y |   |  | TRUE | TRUE |
| Q6GLT0;CL4821Contig1  | MGC84289 protein OS=Xenopus la                                                  | paics.1   |  |   | Y |   |  | TRUE | TRUE |
| Q6GLT3                | MGC84278 protein OS=Xenopus la                                                  | igsf21    |  |   |   |   |  |      |      |
| Q6GLU4                | Pde6ha protein OS=Xenopus laevis                                                | pde6h     |  |   |   |   |  |      |      |
| Q6GLX4;CL22692Contig1 | Regulator of G-protein signaling 9-b                                            | rgs9bpb   |  |   |   |   |  |      |      |
| Q6GLY0                | MGC84136 protein OS=Xenopus la                                                  | sccpdp    |  |   | Y |   |  | TRUE | TRUE |
| Q6GLY5                | Protein asunder homolog OS=Xeno                                                 | asun      |  |   |   |   |  |      |      |
| Q6GM08;CL9083Contig1  | MGC84065 protein OS=Xenopus la                                                  | ntm       |  |   |   | Y |  | TRUE | TRUE |
| Q6GM32                | MGC84010 protein OS=Xenopus la                                                  | fnnl1     |  |   |   |   |  |      |      |
| Q6GM46;CL3306Contig3  | MGC83972 protein OS=Xenopus la                                                  | pde4b     |  |   |   |   |  |      |      |
| Q6GM50                | MGC83967 protein OS=Xenopus la                                                  | rbm11     |  |   | Y |   |  | TRUE | TRUE |
| Q6GM59;CL3818Contig1  | Monocarboxylate transporter 12 OS=                                              | slc16a12  |  |   | Y |   |  | TRUE | TRUE |
| Q6GM62                | MGC83400 protein OS=Xenopus la                                                  | idh3g     |  |   | Y |   |  | TRUE | TRUE |
| Q6GM67                | MGC83388 protein OS=Xenopus la                                                  | MGC83388  |  |   |   |   |  |      |      |
| Q6GM70                | LOC443696 protein (Fragment) OS=                                                | OC443696  |  |   |   |   |  |      |      |
| Q6GM94;CL4854Contig2  | MGC68458 protein OS=Xenopus la                                                  | abat      |  |   | Y |   |  | TRUE | TRUE |
| Q6GM98                | MGC81989 protein OS=Xenopus la                                                  | slc16a3   |  |   | Y |   |  | TRUE | TRUE |
| Q6GMA6;dsrrswapns_com | MGC81949 protein OS=Xenopus la                                                  | cct6a     |  | Y | Y |   |  | TRUE | TRUE |
| Q6GMC1;CL1Contig1214  | MGC81889 protein OS=Xenopus la                                                  | rps27a    |  |   | Y |   |  | TRUE | TRUE |
| Q6GMC7                | Alcohol dehydrogenase [NADP(+)] (                                               | akr1a1    |  |   | Y |   |  | TRUE | TRUE |
| Q6GMC8                | MGC81877 protein OS=Xenopus la                                                  | nctf      |  |   |   |   |  |      |      |
| Q6GMC9;dsrrswapns_com | GMP reductase OS=Xenopus laevis                                                 | gmp2      |  |   | Y |   |  | TRUE | TRUE |
| Q6GMY9                | Exportin-2 OS=Xenopus laevis GN=                                                | cse11     |  |   |   |   |  |      |      |
| Q6GN02                | Acetyl-CoA acetyltransferase B, mit                                             | acat1b    |  |   |   |   |  |      |      |
| Q6GN08                | LOC398742 protein OS=Xenopus la                                                 | ncapd3    |  |   | Y |   |  | TRUE | TRUE |
| Q6GN10                | MGC83654 protein OS=Xenopus la                                                  | rab20     |  |   | Y |   |  | TRUE | TRUE |
| Q6GN12                | MGC83651 protein OS=Xenopus la                                                  | tbc1d4    |  |   | Y |   |  | TRUE | TRUE |
| Q6GN44                | LOC443684 protein (Fragment) OS=                                                | OC443684  |  |   |   |   |  |      |      |
| Q6GN54                | Uncharacterized protein (Fragment) OS=Xenopus laevis PE=2 SV=1 - [Q6GN54_XENLA] |           |  |   |   |   |  |      |      |
| Q6GN59;CL5435Contig1  | MGC83004 protein OS=Xenopus la                                                  | mam1d1    |  |   |   |   |  |      |      |
| Q6GN63;CL5122Contig1  | MGC82998 protein OS=Xenopus la                                                  | idh3a     |  |   | Y |   |  | TRUE | TRUE |
| Q6GN66;CL2418Contig1  | T-complex protein 1 subunit delta O                                             | cct4      |  |   | Y |   |  | TRUE | TRUE |

|                        |                                                                   |                                        |  |  |   |  |   |   |  |      |      |
|------------------------|-------------------------------------------------------------------|----------------------------------------|--|--|---|--|---|---|--|------|------|
| Q6GN79                 | Ribosomal protein L37 OS=Xenopus laevis                           | rpl37                                  |  |  | Y |  | Y |   |  | TRUE | TRUE |
| Q6GNA9;CL4677Contig2   | MGC82910 protein OS=Xenopus laevis                                | zeb1                                   |  |  |   |  | Y |   |  | TRUE | TRUE |
| Q6GND4                 | DbpA protein OS=Xenopus laevis                                    | dbi                                    |  |  |   |  | Y |   |  | TRUE | TRUE |
| Q6GND5                 | MGC82876 protein OS=Xenopus laevis                                | dnajb12                                |  |  |   |  | Y |   |  | TRUE | TRUE |
| Q6GNE6                 | LOC443667 protein (Fragment) OS=Xenopus laevis                    | OC443667                               |  |  |   |  |   |   |  |      |      |
| Q6GNF2                 | MGC82844 protein OS=Xenopus laevis                                | rpl30                                  |  |  |   |  | Y |   |  | TRUE | TRUE |
| Q6GNF4                 | MGC82841 protein OS=Xenopus laevis                                | rsp17                                  |  |  | Y |  |   |   |  | TRUE | TRUE |
| Q6GNH1                 | MGC82808 protein OS=Xenopus laevis                                | rpl23                                  |  |  | Y |  | Y |   |  | TRUE | TRUE |
| Q6GNI8;CL4245Contig2   | MGC82778 protein OS=Xenopus laevis                                | GN=MGC82778 PE=2 SV=1 - [Q6GNI8_XENLA] |  |  |   |  |   |   |  |      |      |
| Q6GNP1;CL9567Contig1   | MGC80975 protein OS=Xenopus laevis                                | dnai1                                  |  |  |   |  | Y |   |  | TRUE | TRUE |
| Q6GNQ1                 | ATPase asna1 OS=Xenopus laevis                                    | asna1                                  |  |  |   |  | Y |   |  | TRUE | TRUE |
| Q6GNQ8                 | MGC80946 protein OS=Xenopus laevis                                | fes                                    |  |  |   |  | Y |   |  | TRUE | TRUE |
| Q6GNR4;CL847Contig2    | MGC80936 protein OS=Xenopus laevis                                | cltc                                   |  |  |   |  |   |   |  |      |      |
| Q6GNR9                 | Dolichyl-diphosphooligosaccharide-4-epimerase OS=Xenopus laevis   | ddost                                  |  |  |   |  | Y |   |  | TRUE | TRUE |
| Q6GNS4                 | MGC80913 protein OS=Xenopus laevis                                | bpgm                                   |  |  |   |  | Y |   |  | TRUE | TRUE |
| Q6GNS8;CL2779Contig3   | MGC80906 protein OS=Xenopus laevis                                | ndufb10                                |  |  |   |  | Y |   |  | TRUE | TRUE |
| Q6GNT1;CL1947Contig1   | MGC80898 protein OS=Xenopus laevis                                | brd1                                   |  |  |   |  |   |   |  |      |      |
| Q6GNU6                 | MGC80868 protein OS=Xenopus laevis                                | apaf1                                  |  |  |   |  | Y | Y |  | TRUE | TRUE |
| Q6GNV0                 | MGC80858 protein OS=Xenopus laevis                                | pag2g4                                 |  |  |   |  |   |   |  |      |      |
| Q6GNV5                 | Formin-binding protein 1 homolog C OS=Xenopus laevis              | fmbp1                                  |  |  |   |  | Y |   |  | TRUE | TRUE |
| Q6GNW4                 | Tetraspanin OS=Xenopus laevis                                     | cd82                                   |  |  |   |  | Y |   |  | TRUE | TRUE |
| Q6GNX6;CL542Contig3    | MGC80804 protein OS=Xenopus laevis                                | rps9                                   |  |  |   |  | Y |   |  | TRUE | TRUE |
| Q6GNY1;CL852Contig4    | E3 ubiquitin-protein ligase mib1 OS=Xenopus laevis                | mib1                                   |  |  |   |  | Y |   |  | TRUE | TRUE |
| Q6GNZ4                 | MGC80774 protein OS=Xenopus laevis                                | mlh3                                   |  |  |   |  | Y |   |  | TRUE | TRUE |
| Q6GP14                 | LOC397993 protein OS=Xenopus laevis                               | OC397993                               |  |  |   |  |   |   |  |      |      |
| Q6GP17;CL314Contig3    | Histone-lysine N-methyltransferase OS=Xenopus laevis              | suv420h1                               |  |  |   |  |   | Y |  | TRUE | TRUE |
| Q6GP18;CL116Contig7    | Superoxide dismutase OS=Xenopus laevis                            | sod                                    |  |  | Y |  |   |   |  | TRUE | TRUE |
| Q6GP33;CL5832Contig2   | Glucose-6-phosphate isomerase OS=Xenopus laevis                   | gpi                                    |  |  |   |  | Y |   |  | TRUE | TRUE |
| Q6GP41;CX133515 UniRef | MGC80700 protein OS=Xenopus laevis                                | GN=MGC80700 PE=2 SV=1                  |  |  | Y |  |   |   |  | TRUE | TRUE |
| Q6GP54                 | LOC443639 protein (Fragment) OS=Xenopus laevis                    | OC443639                               |  |  |   |  |   |   |  |      |      |
| Q6GP66                 | MRTF-A protein OS=Xenopus laevis                                  | mk1                                    |  |  |   |  | Y |   |  | TRUE | TRUE |
| Q6GPA3                 | LOC443632 protein (Fragment) OS=Xenopus laevis                    | OC443632                               |  |  |   |  |   |   |  |      |      |
| Q6GPA5;CL2250Contig2   | Protein tweety homolog 3 OS=Xenopus laevis                        | ttyh3                                  |  |  |   |  |   |   |  |      |      |
| Q6GPB1;CL1907Contig3   | MGC80559 protein OS=Xenopus laevis                                | ammecr11                               |  |  |   |  | Y |   |  | TRUE | TRUE |
| Q6GPB7                 | 4-hydroxyphenylpyruvate dioxygenase OS=Xenopus laevis             | hpd1                                   |  |  |   |  |   |   |  |      |      |
| Q6GPC4;CL12623Contig1  | MGC80505 protein OS=Xenopus laevis                                | ndufb7                                 |  |  |   |  | Y |   |  | TRUE | TRUE |
| Q6GPD0                 | Rho GTPase-activating protein 32 OS=Xenopus laevis                | arhgap32                               |  |  |   |  | Y |   |  | TRUE | TRUE |
| Q6GPD0;CL615Contig1    | Rho GTPase-activating protein 32 OS=Xenopus laevis                | arhgap32                               |  |  |   |  | Y |   |  | TRUE | TRUE |
| Q6GPD6;CL2008Contig2   | MGC80474 protein OS=Xenopus laevis                                | cnpy2                                  |  |  |   |  | Y |   |  | TRUE | TRUE |
| Q6GPE1;CL1282Contig2   | Wu:fc30a11 protein OS=Xenopus laevis                              | ap1g1                                  |  |  |   |  |   |   |  |      |      |
| Q6GPK9;CL1Contig1019   | Serine/threonine-protein kinase TAO2 OS=Xenopus laevis            | taok2                                  |  |  |   |  |   | Y |  | TRUE | TRUE |
| Q6GPL5                 | MGC83562 protein OS=Xenopus laevis                                | atpbd4                                 |  |  |   |  | Y |   |  | TRUE | TRUE |
| Q6GPL6                 | MGC83560 protein OS=Xenopus laevis                                | gca                                    |  |  |   |  | Y |   |  | TRUE | TRUE |
| Q6GPP8                 | MGC82702 protein OS=Xenopus laevis                                | hbai5                                  |  |  | Y |  |   |   |  | TRUE | TRUE |
| Q6GPQ9;CL12997Contig1  | MGC82679 protein OS=Xenopus laevis                                | ndufs6                                 |  |  |   |  | Y |   |  | TRUE | TRUE |
| Q6GPS0                 | MGC82653 protein OS=Xenopus laevis                                | mdn1                                   |  |  |   |  | Y |   |  | TRUE | TRUE |
| Q6GPS9                 | MGC82638 protein OS=Xenopus laevis                                | hadha                                  |  |  |   |  | Y | Y |  | TRUE | TRUE |
| Q6GPT0;CL10608Contig1  | MGC82636 protein OS=Xenopus laevis                                | MGC82636                               |  |  | Y |  |   |   |  | TRUE | TRUE |
| Q6GPU5                 | MGC82602 protein OS=Xenopus laevis                                | GN=MGC82602 PE=2 SV=1 - [Q6GPU5_XENLA] |  |  |   |  |   |   |  |      |      |
| Q6GPV2                 | LOC443605 protein (Fragment) OS=Xenopus laevis                    | OC443605                               |  |  | Y |  |   |   |  | TRUE | TRUE |
| Q6GPW4                 | Transmembrane protein 205 OS=Xenopus laevis                       | tmem205                                |  |  |   |  | Y |   |  | TRUE | TRUE |
| Q6GPX6;CL1066Contig1   | MGC82535 protein OS=Xenopus laevis                                | fam129b                                |  |  |   |  | Y |   |  | TRUE | TRUE |
| Q6GPX8                 | MGC82533 protein OS=Xenopus laevis                                | pafah2                                 |  |  |   |  | Y |   |  | TRUE | TRUE |
| Q6GPPY3                | MGC82521 protein OS=Xenopus laevis                                | prdx5                                  |  |  |   |  | Y |   |  | TRUE | TRUE |
| Q6GQ04                 | MGC80529 protein OS=Xenopus laevis                                | cdc27                                  |  |  |   |  | Y |   |  | TRUE | TRUE |
| Q6GQ13                 | MGC80460 protein OS=Xenopus laevis                                | lars2                                  |  |  |   |  | Y |   |  | TRUE | TRUE |
| Q6GQ21;CL1684Contig2   | Peptidyl-prolyl cis-trans isomerase C OS=Xenopus laevis           | ppia                                   |  |  |   |  | Y |   |  | TRUE | TRUE |
| Q6GQ37;CL8951Contig1   | Protein midA homolog, mitochondrial OS=Xenopus laevis             | midA                                   |  |  |   |  |   |   |  |      |      |
| Q6GQ40;CL5428Contig3   | Proteasome subunit beta type OS=Xenopus laevis                    | psmb2                                  |  |  |   |  |   |   |  |      |      |
| Q6GQ45                 | MGC80353 protein OS=Xenopus laevis                                | ndufb3                                 |  |  |   |  | Y |   |  | TRUE | TRUE |
| Q6GQ57                 | MGC80329 protein OS=Xenopus laevis                                | pel1                                   |  |  |   |  | Y |   |  | TRUE | TRUE |
| Q6GQ61                 | MGC80319 protein OS=Xenopus laevis                                | dnpep                                  |  |  |   |  | Y |   |  | TRUE | TRUE |
| Q6GQ64                 | Thioredoxin OS=Xenopus laevis                                     | txn                                    |  |  |   |  |   |   |  |      |      |
| Q6GQ64;TC423515 UniRef | Thioredoxin OS=Xenopus laevis                                     | GN=MGC80314                            |  |  |   |  |   |   |  |      |      |
| Q6GQ76                 | Cap-specific mRNA (nucleoside-2'-C) OS=Xenopus laevis             | cmtr1                                  |  |  |   |  |   |   |  |      |      |
| Q6GQ76;CL4342Contig3   | Cap-specific mRNA (nucleoside-2'-C) OS=Xenopus laevis             | ftsjd2                                 |  |  |   |  | Y |   |  | TRUE | TRUE |
| Q6GQ91;dsrrswapns_com  | MGC80253 protein OS=Xenopus laevis                                | ndufa4                                 |  |  |   |  |   |   |  |      |      |
| Q6GQ97                 | MGC80235 protein OS=Xenopus laevis                                | rassf3                                 |  |  |   |  | Y |   |  | TRUE | TRUE |
| Q6GQA7;CL5376Contig2   | MGC80207 protein OS=Xenopus laevis                                | dars                                   |  |  |   |  | Y |   |  | TRUE | TRUE |
| Q6GQA8                 | LOC443584 protein (Fragment) OS=Xenopus laevis                    | OC443584                               |  |  |   |  |   |   |  |      |      |
| Q6GQB1                 | MGC80200 protein OS=Xenopus laevis                                | nrcam                                  |  |  |   |  |   |   |  |      |      |
| Q6GQB2                 | MGC80199 protein OS=Xenopus laevis                                | rpl7a                                  |  |  | Y |  | Y |   |  | TRUE | TRUE |
| Q6GQB6                 | MGC80186 protein OS=Xenopus laevis                                | MGC80186                               |  |  |   |  |   |   |  |      |      |
| Q6GQC6;CL14883Contig1  | MGC80163 protein OS=Xenopus laevis                                | GN=MGC80163 PE=4 SV=1 - [Q6GQC6_XENLA] |  |  |   |  |   | Y |  | TRUE | TRUE |
| Q6GQD0                 | Nuclear cap-binding protein subunit OS=Xenopus laevis             | ncbp1-b                                |  |  |   |  |   |   |  |      |      |
| Q6GQD1                 | Cytoplasmic FMR1-interacting protein OS=Xenopus laevis            | cyfp2                                  |  |  |   |  | Y |   |  | TRUE | TRUE |
| Q6GQD7;CL206Contig9    | AT-rich interactive domain-containing protein 1 OS=Xenopus laevis | arid3a                                 |  |  |   |  | Y |   |  | TRUE | TRUE |
| Q6GQG6;CL5043Contig1   | Npm-A protein OS=Xenopus laevis                                   | npm2                                   |  |  |   |  | Y |   |  | TRUE | TRUE |
| Q6GQH7                 | Putative uncharacterized protein (Fragment) OS=Xenopus laevis     | PE=2 SV=1 - [Q6GQH7_XENLA]             |  |  |   |  |   |   |  |      |      |
| Q6GQI7;CL3975Contig1   | Alpha-1,3-mannosyl-glycoprotein 4-epimerase OS=Xenopus laevis     | mgat4a                                 |  |  |   |  | Y |   |  | TRUE | TRUE |
| Q6GR06;CL3748Contig2   | MGC81473 protein OS=Xenopus laevis                                | cbr3                                   |  |  |   |  |   |   |  |      |      |
| Q6GR11                 | MGC81430 protein OS=Xenopus laevis                                | vdac3                                  |  |  |   |  | Y |   |  | TRUE | TRUE |
| Q6GR23                 | MGC81304 protein OS=Xenopus laevis                                | irf6                                   |  |  |   |  | Y |   |  | TRUE | TRUE |
| Q6GR29                 | Ruvb1 protein OS=Xenopus laevis                                   | ruvb1                                  |  |  |   |  | Y |   |  | TRUE | TRUE |
| Q6GR45;dsrrswapns_com  | Eukaryotic translation initiation factor 4E OS=Xenopus laevis     | eif6                                   |  |  |   |  | Y |   |  | TRUE | TRUE |
| Q6GR58;CL4491Contig2   | Malate dehydrogenase OS=Xenopus laevis                            | mdh2                                   |  |  | Y |  | Y |   |  | TRUE | TRUE |



|                       |                                                                                        |           |  |   |   |   |   |   |      |      |
|-----------------------|----------------------------------------------------------------------------------------|-----------|--|---|---|---|---|---|------|------|
| Q6GR63                | MGC78967 protein OS=Xenopus la                                                         | rab2b     |  |   | Y |   |   |   | TRUE | TRUE |
| Q6GR67;CL1Contig211   | LOC397932 protein OS=Xenopus la                                                        | LOC397932 |  |   |   |   |   |   |      |      |
| Q6INA9                | Histone-lysine N-methyltransferase                                                     | setdb1    |  |   |   |   |   |   |      |      |
| Q6INB6;CL4908Contig2  | ATP synthase gamma chain OS=Xe                                                         | atp5c     |  | Y |   |   |   |   | TRUE | TRUE |
| Q6IND5                | MGC83495 protein OS=Xenopus la                                                         | vwa5a     |  |   | Y |   |   |   | TRUE | TRUE |
| Q6INE5                | Rho GTPase-activating protein 19 C                                                     | arhgap19  |  |   | Y |   | Y |   | TRUE | TRUE |
| Q6INE6                | LOC432244 protein (Fragment) OS                                                        | LOC432244 |  |   |   |   |   |   |      |      |
| Q6INF1                | LOC432253 protein (Fragment) OS                                                        | LOC432253 |  |   |   |   |   |   |      |      |
| Q6ING0                | LOC443576 protein (Fragment) OS=Xenopus laevis GN=LOC443576 PE=2 SV=1 - [Q6ING0_XENLA] |           |  |   |   |   |   |   |      |      |
| Q6INH3                | MGC82600 protein OS=Xenopus la                                                         | MGC82600  |  |   |   |   |   |   |      |      |
| Q6INJ7                | LOC432278 protein (Fragment) OS                                                        | LOC432278 |  |   |   |   |   |   |      |      |
| Q6INK1                | MGC82415 protein OS=Xenopus laevis GN=MGC82415 PE=2 SV=1 - [Q6INK1_XENLA]              |           |  |   |   |   |   |   |      |      |
| Q6INK3                | Putative uncharacterized protein OS=Xenopus laevis PE=2 SV=1 - [Q6INK3_XENLA]          |           |  |   |   |   |   |   |      |      |
| Q6INM6;CL1435Contig4  | MGC82347 protein OS=Xenopus la                                                         | MGC82347  |  |   |   |   |   |   |      |      |
| Q6INN4;CL17153Contig1 | MGC82295 protein OS=Xenopus la                                                         | cox5b.2   |  | Y |   | Y |   |   | TRUE | TRUE |
| Q6INP8                | Mediator of RNA polymerase II tran                                                     | med1      |  |   |   | Y |   |   | TRUE | TRUE |
| Q6INQ1;CL8291Contig1  | MGC81422 protein OS=Xenopus la                                                         | bysl      |  |   |   | Y |   |   | TRUE | TRUE |
| Q6INR2                | Proline-5-carboxylate reductase C                                                      | pycr1     |  |   |   | Y |   |   | TRUE | TRUE |
| Q6INS0;CL10203Contig2 | MGC81156 protein OS=Xenopus la                                                         | gstt1     |  |   |   | Y |   |   | TRUE | TRUE |
| Q6INT1                | MGC80376 protein OS=Xenopus la                                                         | ikbbb     |  |   |   | Y |   |   | TRUE | TRUE |
| Q6INT6                | MGC80342 protein OS=Xenopus la                                                         | aagab     |  |   |   | Y |   |   | TRUE | TRUE |
| Q6INT7                | MGC80341 protein OS=Xenopus la                                                         | mark1     |  |   |   | Y |   |   | TRUE | TRUE |
| Q6INU2                | BSD domain-containing protein 1-A                                                      | bsdc1     |  |   |   | Y |   |   | TRUE | TRUE |
| Q6INX6                | MGC80065 protein OS=Xenopus la                                                         | rps16     |  | Y |   | Y |   |   | TRUE | TRUE |
| Q6IP26                | MGC79007 protein OS=Xenopus la                                                         | cox5a     |  |   |   | Y |   |   | TRUE | TRUE |
| Q6IP53;CL7135Contig1  | MGC78949 protein OS=Xenopus la                                                         | tek11     |  |   |   |   |   |   |      |      |
| Q6IP60;CL654Contig2   | Hspd1 protein OS=Xenopus laevis                                                        | hspd1     |  |   | Y |   |   |   | TRUE | TRUE |
| Q6IP76                | RAC-beta serine/threonine-protein k                                                    | akt2b     |  |   |   |   |   |   |      |      |
| Q6IP78                | LOC432230 protein (Fragment) OS                                                        | LOC432230 |  |   |   |   |   |   |      |      |
| Q6IP80                | MGC78878 protein OS=Xenopus la                                                         | MGC78878  |  |   |   |   |   |   |      |      |
| Q6IP81                | MGC78867 protein OS=Xenopus la                                                         | lta4h     |  |   |   |   |   |   |      |      |
| Q6IP81;CL11159Contig1 | MGC78867 protein OS=Xenopus la                                                         | lta4h     |  | Y |   |   |   |   | TRUE | TRUE |
| Q6IR54                | MGC83487 protein OS=Xenopus la                                                         | MGC83487  |  |   |   |   |   |   |      |      |
| Q6IR55;CL5221Contig2  | E3 ubiquitin-protein ligase TM129 C                                                    | tmem129   |  |   |   | Y |   |   | TRUE | TRUE |
| Q6IR57                | MGC82326 protein OS=Xenopus la                                                         | sec31b    |  |   |   | Y |   |   | TRUE | TRUE |
| Q6IR60                | Calponin OS=Xenopus laevis GN=c                                                        | cnn2      |  |   |   | Y |   |   | TRUE | TRUE |
| Q6IR70                | Protein phosphatase 1 regulatory su                                                    | ppp1r21   |  |   |   |   |   |   |      |      |
| Q6IR71                | MGC82264 protein OS=Xenopus la                                                         | MGC82264  |  |   |   |   |   |   |      |      |
| Q6IR73                | Frs3 protein OS=Xenopus laevis GN                                                      | frs3      |  |   | Y |   |   |   | TRUE | TRUE |
| Q6IRA2;CL1Contig101   | XTm4 protein OS=Xenopus laevis                                                         | tm4       |  |   |   |   |   |   |      |      |
| Q6IRB4                | MGC78852 protein OS=Xenopus la                                                         | mapkapk2  |  |   | Y |   |   |   | TRUE | TRUE |
| Q6IRM3                | MGC84589 protein OS=Xenopus la                                                         | MGC84589  |  |   |   |   |   |   |      |      |
| Q6IRM8                | MGC83924 protein OS=Xenopus la                                                         | MGC83924  |  |   |   |   |   |   |      |      |
| Q6IRN1;CL8563Contig2  | MGC83880 protein OS=Xenopus la                                                         | eftud1    |  |   |   | Y |   |   | TRUE | TRUE |
| Q6IRP1                | Grx5-prov protein (Fragment) OS=X                                                      | grx5      |  |   |   |   |   |   |      |      |
| Q6IRP2;CL11620Contig1 | MGC83164 protein OS=Xenopus la                                                         | MGC83164  |  |   |   |   |   |   |      |      |
| Q6IRP7;CL2114Contig1  | MGC82361 protein OS=Xenopus la                                                         | atp5h     |  |   | Y |   |   |   | TRUE | TRUE |
| Q6IRQ1                | 70 kDa peroxisomal membrane prot                                                       | abcd3     |  |   |   | Y |   | Y | TRUE | TRUE |
| Q6IRQ8;CL4086Contig2  | MGC81450 protein OS=Xenopus la                                                         | pgam1     |  |   |   | Y |   |   | TRUE | TRUE |
| Q6IRR0                | TOX high mobility group box family                                                     | tox4      |  |   |   |   |   |   |      |      |
| Q6IVY4;CL5230Contig1  | Protein phosphatase Slingshot hom                                                      | ssh       |  |   |   |   |   |   |      |      |
| Q6JA20;CL4546Contig2  | 38k protein OS=Xenopus laevis PE                                                       | x38k      |  |   |   |   |   |   |      |      |
| Q6JDF3                | Schnurri 2 (Fragment) OS=Xenopus                                                       | shn2      |  |   |   |   |   |   |      |      |
| Q6JRV9                | Reticulon OS=Xenopus laevis GN=f                                                       | rtn4      |  |   | Y |   |   |   | TRUE | TRUE |
| Q6NRB2                | MGC84587 protein OS=Xenopus la                                                         | hibadh    |  |   |   |   |   |   |      |      |
| Q6NRB7                | Protein FAM73A OS=Xenopus laevi                                                        | fam73a    |  |   | Y |   |   |   | TRUE | TRUE |
| Q6NRC4                | LOC431827 protein (Fragment) OS                                                        | LOC431827 |  |   |   |   |   |   |      |      |
| Q6NRC5;zeinaSSns_comp | MGC83936 protein OS=Xenopus la                                                         | dync112   |  |   |   |   |   |   |      |      |
| Q6NRD1;CL2519Contig1  | MGC83915 protein OS=Xenopus la                                                         | ctns      |  |   | Y |   |   |   | TRUE | TRUE |
| Q6NRD3                | E3 ubiquitin-protein ligase SH3RF1                                                     | sh3rf1    |  |   |   | Y |   |   | TRUE | TRUE |
| Q6NRF6;CL9526Contig1  | MGC83851 protein OS=Xenopus la                                                         | tmem30b   |  |   |   | Y |   |   | TRUE | TRUE |
| Q6NRH1                | DDB1- and CUL4-associated factor                                                       | dcaf8     |  |   |   | Y |   |   | TRUE | TRUE |
| Q6NRI2                | MGC83797 protein OS=Xenopus la                                                         | klhl7     |  |   |   | Y |   |   | TRUE | TRUE |
| Q6NRJ2                | MGC83776 protein OS=Xenopus la                                                         | rab11fip5 |  |   |   | Y |   |   | TRUE | TRUE |
| Q6NRL5                | LOC431868 protein (Fragment) OS                                                        | LOC431868 |  |   |   |   |   |   |      |      |
| Q6NRP3                | MGC83246 protein OS=Xenopus la                                                         | slc4a7    |  |   |   |   |   |   |      |      |
| Q6NRP6                | Tudor domain-containing protein 3 C                                                    | tdrd3     |  |   |   | Y |   |   | TRUE | TRUE |
| Q6NRP7;TC434081 UniRe | MGC83147 protein OS=Xenopus la                                                         | srm       |  |   | Y |   |   |   | TRUE | TRUE |
| Q6NRP9                | MGC83117 protein OS=Xenopus la                                                         | ptpn4     |  |   |   | Y |   |   | TRUE | TRUE |
| Q6NRQ9;CL5407Contig1  | MGC82327 protein OS=Xenopus la                                                         | MGC82327  |  | Y |   |   |   |   | TRUE | TRUE |
| Q6NRR6                | MGC82267 protein OS=Xenopus la                                                         | MGC82267  |  |   |   |   |   |   |      |      |
| Q6NRS1                | Inhibitor of Bruton tyrosine kinase O                                                  | ibtk      |  |   |   | Y |   |   | TRUE | TRUE |
| Q6NRT0;TC416396 UniRe | Casein kinase I isoform gamma-1 C                                                      | csnk1g1   |  |   |   | Y |   |   | TRUE | TRUE |
| Q6NRT2                | MGC81481 protein OS=Xenopus la                                                         | scyl3     |  |   |   | Y |   |   | TRUE | TRUE |
| Q6NRT7                | MGC81452 protein OS=Xenopus la                                                         | akt1s1    |  |   |   |   |   |   |      |      |
| Q6NRV3;CL1402Contig3  | MGC81323 protein OS=Xenopus la                                                         | tuba1a    |  |   | Y |   |   |   | TRUE | TRUE |
| Q6NRV4                | Retinol dehydrogenase 10-B OS=Xe                                                       | rdh10     |  |   |   | Y |   |   | TRUE | TRUE |
| Q6NRW7;CL3725Contig3  | MGC81186 protein OS=Xenopus la                                                         | clns1a    |  |   |   | Y |   |   | TRUE | TRUE |
| Q6NRY1;CL6842Contig1  | MGC81067 protein OS=Xenopus la                                                         | habp4     |  | Y |   |   |   |   | TRUE | TRUE |
| Q6NRY5;CL13546Contig1 | MGC81049 protein OS=Xenopus la                                                         | cmc1      |  |   |   |   |   |   |      |      |
| Q6NRY9;CL2762Contig2  | 14-3-3 protein gamma-B OS=Xenop                                                        | ywhag     |  |   |   | Y |   |   | TRUE | TRUE |
| Q6NS25;CL8312Contig1  | MGC78791 protein OS=Xenopus la                                                         | ints2     |  |   |   | Y |   |   | TRUE | TRUE |
| Q6NTJ0                | LOC414678 protein (Fragment) OS                                                        | LOC414678 |  |   |   |   |   |   |      |      |
| Q6NTL5;CL6428Contig2  | MGC83205 protein OS=Xenopus la                                                         | cog6      |  |   |   | Y |   |   | TRUE | TRUE |
| Q6NTP3;CL8757Contig1  | MGC83130 protein OS=Xenopus laevis GN=MGC83130 PE=4 SV=1 - [Q6NTP3_XENLA]              |           |  |   |   |   |   |   |      |      |
| Q6NTP6                | Psm2d protein OS=Xenopus laevis                                                        | psmd2     |  |   |   | Y |   |   | TRUE | TRUE |

|                       |                                                                                      |  |   |   |   |   |   |  |      |      |
|-----------------------|--------------------------------------------------------------------------------------|--|---|---|---|---|---|--|------|------|
| Q6NTP7;CL640Contig5   | LOC398139 protein OS=Xenopus laevis GN=LOC398139 PE=2 SV=1                           |  | Y |   |   |   |   |  | TRUE | TRUE |
| Q6NTQ3                | LOC414455 protein (Fragment) OS=Xenopus laevis GN=LOC414455                          |  |   |   |   |   |   |  |      |      |
| Q6NTQ9;CL7675Contig2  | Ndufa10b protein OS=Xenopus laevis GN=Ndufa10                                        |  |   | Y |   |   |   |  | TRUE | TRUE |
| Q6NTR4;CL6643Contig1  | MGC83076 protein OS=Xenopus laevis GN=rpl14                                          |  |   | Y |   | Y |   |  | TRUE | TRUE |
| Q6NTR6;CL3218Contig1  | Ubiquitin carboxyl-terminal hydrolase 1 OS=Xenopus laevis GN=usp44                   |  |   | Y |   |   |   |  | TRUE | TRUE |
| Q6NTR9;CL10023Contig1 | MGC82428 protein OS=Xenopus laevis GN=cox6b1                                         |  |   |   |   |   |   |  | TRUE | TRUE |
| Q6NTS1;CL2114Contig3  | MGC82400 protein OS=Xenopus laevis GN=MGC82400 PE=2 SV=1 - [Q6NTS1_XENLA]            |  |   |   |   |   |   |  |      |      |
| Q6NTS6;CL11770Contig1 | SH3 domain-binding glutamic acid-rich protein OS=Xenopus laevis GN=sh3bgrl3          |  |   |   |   | Y |   |  | TRUE | TRUE |
| Q6NTT0                | MGC82310 protein OS=Xenopus laevis GN=hrsp12                                         |  |   |   |   | Y |   |  | TRUE | TRUE |
| Q6NTT1                | LOC398508 protein (Fragment) OS=Xenopus laevis GN=LOC398508                          |  |   |   |   |   |   |  |      |      |
| Q6NTT2                | MGC82306 protein OS=Xenopus laevis GN=rps18                                          |  |   |   |   |   |   |  |      |      |
| Q6NTU4                | Park7 protein OS=Xenopus laevis GN=park7                                             |  | Y |   | Y |   |   |  | TRUE | TRUE |
| Q6NTU8                | MGC82214 protein OS=Xenopus laevis GN=grhpr.1                                        |  |   |   | Y |   |   |  | TRUE | TRUE |
| Q6NTX7;CL3174Contig3  | Kcnab2 protein OS=Xenopus laevis GN=kcnab2                                           |  |   |   |   |   |   |  |      |      |
| Q6NU02;CL367Contig6   | LOC443739 protein OS=Xenopus laevis GN=eif4a1                                        |  |   |   | Y |   |   |  | TRUE | TRUE |
| Q6NU15                | LOC398496 protein OS=Xenopus laevis GN=jup                                           |  |   |   | Y |   |   |  | TRUE | TRUE |
| Q6NU16;CL1235Contig4  | MGC81333 protein OS=Xenopus laevis GN=eif1ax                                         |  |   |   | Y |   |   |  | TRUE | TRUE |
| Q6NU33                | MGC81285 protein OS=Xenopus laevis GN=eps8                                           |  |   |   | Y |   |   |  | TRUE | TRUE |
| Q6NU36                | MGC81278 protein OS=Xenopus laevis GN=anapc4                                         |  |   |   | Y |   |   |  | TRUE | TRUE |
| Q6NU42                | MGC81264 protein OS=Xenopus laevis GN=MGC81264                                       |  |   |   |   |   |   |  |      |      |
| Q6NU46;CL5600Contig2  | Acetyl-CoA acetyltransferase A, mitochondrial OS=Xenopus laevis GN=acat1             |  |   |   |   |   |   |  |      |      |
| Q6NU47;CL6335Contig1  | Serine/threonine-protein kinase pdik1 OS=Xenopus laevis GN=pdik1a                    |  |   |   |   |   |   |  |      |      |
| Q6NU54;CL2259Contig1  | MGC81241 protein OS=Xenopus laevis GN=tsc22d2                                        |  |   |   |   | Y |   |  | TRUE | TRUE |
| Q6NU56                | Methyltransferase-like protein 14 OS=Xenopus laevis GN=mettl14                       |  |   |   | Y |   |   |  | TRUE | TRUE |
| Q6NU90;CL8453Contig1  | MGC81140 protein OS=Xenopus laevis GN=lap3                                           |  | Y |   | Y |   |   |  | TRUE | TRUE |
| Q6NU97;CL5953Contig1  | MGC81120 protein OS=Xenopus laevis GN=MGC81120                                       |  |   |   |   |   |   |  |      |      |
| Q6NUB1                | MGC81092 protein OS=Xenopus laevis GN=thul16                                         |  |   |   | Y |   |   |  | TRUE | TRUE |
| Q6NUB6;dsrrswapns_com | MGC81083 protein OS=Xenopus laevis GN=nme4                                           |  |   |   | Y |   |   |  | TRUE | TRUE |
| Q6NUC2                | COP9 signalosome complex subunit 6 OS=Xenopus laevis GN=cops6                        |  |   |   | Y |   |   |  | TRUE | TRUE |
| Q6NUC6;CL25Contig6    | Roquin OS=Xenopus laevis GN=rc3h1                                                    |  |   |   | Y |   |   |  | TRUE | TRUE |
| Q6NUC7;CL5043Contig2  | Putative uncharacterized protein OS=Xenopus laevis PE=2 SV=1 - [Q6NUC7_XENLA]        |  |   |   |   |   |   |  |      |      |
| Q6NUD2                | MGC81047 protein OS=Xenopus laevis GN=dtymk                                          |  |   |   |   |   |   |  |      |      |
| Q6NUD4                | Putative hydroxypyruvate isomerase OS=Xenopus laevis GN=hyi                          |  |   |   |   |   |   |  |      |      |
| Q6NUG0                | MGC79030 protein OS=Xenopus laevis GN=hspe1                                          |  | Y |   | Y |   |   |  | TRUE | TRUE |
| Q6NUH0;CL2830Contig1  | 60S ribosomal protein L31 OS=Xenopus laevis GN=rpl31                                 |  | Y |   | Y |   |   |  | TRUE | TRUE |
| Q6P283                | MGC69013 protein OS=Xenopus laevis GN=ccdc71                                         |  |   |   | Y |   | Y |  | TRUE | TRUE |
| Q6P286;CL8201Contig1  | Probable 2-oxoglutarate dehydrogenase OS=Xenopus laevis GN=dhtkd1                    |  |   |   |   | Y |   |  | TRUE | TRUE |
| Q6P412;CL2784Contig1  | MGC68722 protein OS=Xenopus laevis GN=rab15                                          |  |   |   |   |   |   |  |      |      |
| Q6P417                | MGC68516 protein OS=Xenopus laevis GN=MGC68516                                       |  |   |   |   |   |   |  |      |      |
| Q6P699                | MGC68562 protein OS=Xenopus laevis GN=rplp1                                          |  |   |   | Y |   |   |  | TRUE | TRUE |
| Q6P7F7                | MGC68765 protein OS=Xenopus laevis GN=smtn                                           |  |   |   | Y |   |   |  | TRUE | TRUE |
| Q6P7F8;CL9604Contig1  | MGC68767 protein OS=Xenopus laevis GN=napsa                                          |  |   |   | Y |   |   |  | TRUE | TRUE |
| Q6P7J1                | Hydroxysteroid 11-beta-dehydrogenase OS=Xenopus laevis GN=hsd11b1-a                  |  |   |   |   |   |   |  |      |      |
| Q6P7J6;CL13096Contig1 | MGC68461 protein OS=Xenopus laevis GN=glrx                                           |  |   |   |   |   |   |  |      |      |
| Q6P9I2;CL2377Contig1  | MGC69046 protein OS=Xenopus laevis GN=col3a1                                         |  |   |   |   |   |   |  |      |      |
| Q6P9I7;CL6420Contig1  | Structural maintenance of chromosomes protein 6 OS=Xenopus laevis GN=smc6            |  |   |   |   |   |   |  |      |      |
| Q6PA07                | MGC68806 protein OS=Xenopus laevis GN=ptk7                                           |  |   |   | Y |   |   |  | TRUE | TRUE |
| Q6PA16;CL2923Contig2  | MGC68778 protein OS=Xenopus laevis GN=brap                                           |  |   |   | Y |   |   |  | TRUE | TRUE |
| Q6PA24                | MGC68726 protein OS=Xenopus laevis GN=capza1                                         |  |   |   |   |   |   |  |      |      |
| Q6PA32                | MGC68657 protein OS=Xenopus laevis GN=slco2a1                                        |  |   |   |   |   |   |  |      |      |
| Q6PA48                | Protein TBRG4 OS=Xenopus laevis GN=tbrg4                                             |  |   |   | Y |   |   |  | TRUE | TRUE |
| Q6PA58                | Succinate dehydrogenase [ubiquinone-binding] OS=Xenopus laevis GN=sdha               |  | Y |   |   |   |   |  | TRUE | TRUE |
| Q6PA74;CL7508Contig1  | Dimethylaniline monooxygenase [NAD(P)H-dependent] OS=Xenopus laevis GN=fmo2          |  |   |   |   | Y |   |  | TRUE | TRUE |
| Q6PA94                | MGC68590 protein OS=Xenopus laevis GN=MGC68590                                       |  |   |   |   |   |   |  |      |      |
| Q6PAB3;dsrrswapns_com | Malate dehydrogenase, cytoplasmic OS=Xenopus laevis GN=mdh1                          |  | Y |   | Y |   |   |  | TRUE | TRUE |
| Q6PAB5;CL3453Contig3  | MGC68609 protein OS=Xenopus laevis GN=akr1b1                                         |  |   |   | Y |   |   |  | TRUE | TRUE |
| Q6PAC8                | MGC68803 protein OS=Xenopus laevis GN=MGC68803                                       |  |   |   |   |   |   |  |      |      |
| Q6PAD3;CL1008Contig1  | Psmc4 protein OS=Xenopus laevis GN=psmc4                                             |  |   |   | Y |   |   |  | TRUE | TRUE |
| Q6PAD5                | MGC68755 protein OS=Xenopus laevis GN=pnliprp2                                       |  |   |   |   |   |   |  |      |      |
| Q6PAD8                | MGC68745 protein OS=Xenopus laevis GN=MGC68745                                       |  |   |   |   |   |   |  |      |      |
| Q6PAE3                | MGC68448 protein OS=Xenopus laevis GN=MGC68448 PE=2 SV=1 - [Q6PAE3_XENLA]            |  |   |   |   |   |   |  |      |      |
| Q6PAV9;CL20295Contig1 | MGC68699 protein OS=Xenopus laevis GN=MGC68699 PE=2 SV=1 - [Q6PAV9_XENLA]            |  |   |   |   |   |   |  |      |      |
| Q6PAW6                | MGC68638 protein OS=Xenopus laevis GN=MGC68638                                       |  |   |   |   |   |   |  |      |      |
| Q6PAX7;CL2204Contig1  | WD repeat-containing protein 1-B OS=Xenopus laevis GN=wdr1                           |  |   |   |   | Y |   |  | TRUE | TRUE |
| Q6PAY8;CL13107Contig1 | Hydroxysteroid dehydrogenase-like protein OS=Xenopus laevis GN=hsd12                 |  | Y |   | Y |   |   |  | TRUE | TRUE |
| Q6PAZ0                | MGC68780 protein OS=Xenopus laevis GN=tomm70a                                        |  |   |   |   | Y |   |  | TRUE | TRUE |
| Q6PAZ2                | MGC68680 protein OS=Xenopus laevis GN=MGC68680                                       |  |   |   |   |   |   |  |      |      |
| Q6PAZ6;CL4518Contig2  | MGC68700 protein OS=Xenopus laevis GN=MGC68700                                       |  |   |   |   |   |   |  |      |      |
| Q6PB01                | MGC68688 protein OS=Xenopus laevis GN=siae                                           |  |   |   |   | Y |   |  | TRUE | TRUE |
| Q6PB11;dsrrswapns_com | MGC68624 protein OS=Xenopus laevis GN=nprl3                                          |  |   |   | Y |   |   |  | TRUE | TRUE |
| Q6PB20;CL2763Contig1  | MGC68482 protein OS=Xenopus laevis GN=bace2                                          |  |   |   | Y |   |   |  | TRUE | TRUE |
| Q6PB22;CL8454Contig1  | MGC68500 protein OS=Xenopus laevis GN=MGC68500 PE=2 SV=1                             |  | Y |   |   |   |   |  | TRUE | TRUE |
| Q6PCE5;CL6542Contig1  | Succinyl-CoA:3-ketoacid-coenzyme A ligase OS=Xenopus laevis GN=oxct1                 |  |   |   |   | Y |   |  | TRUE | TRUE |
| Q6PCF2                | MGC69167 protein OS=Xenopus laevis GN=cul2                                           |  |   |   | Y |   |   |  | TRUE | TRUE |
| Q6PCF9                | Putative sodium-coupled neutral amino acid transporter OS=Xenopus laevis GN=slc38a10 |  |   |   | Y |   |   |  | TRUE | TRUE |
| Q6PC11                | MGC68997 protein OS=Xenopus laevis GN=nadk                                           |  |   |   | Y |   |   |  | TRUE | TRUE |
| Q6PC15                | Mtmr3 protein OS=Xenopus laevis GN=mtmr3                                             |  |   |   | Y |   |   |  | TRUE | TRUE |
| Q6PCJ3                | MGC68945 protein OS=Xenopus laevis GN=yeats2                                         |  |   |   | Y |   |   |  | TRUE | TRUE |
| Q6PCK3                | MGC68869 protein OS=Xenopus laevis GN=MGC68869 PE=2 SV=1 - [Q6PCK3_XENLA]            |  |   |   |   |   |   |  |      |      |
| Q6PCK8                | MGC68835 protein OS=Xenopus laevis GN=sema5b                                         |  |   |   | Y |   |   |  | TRUE | TRUE |
| Q6PF20;CL1Contig1255  | Pcna-A protein OS=Xenopus laevis GN=pcna                                             |  |   |   | Y |   |   |  | TRUE | TRUE |
| Q6PF33                | Mmp9 protein OS=Xenopus laevis GN=mmp9                                               |  |   |   | Y |   |   |  | TRUE | TRUE |
| Q6PF36                | MGC69020 protein OS=Xenopus laevis GN=zer1                                           |  |   |   | Y |   |   |  | TRUE | TRUE |
| Q6PF45                | Vesicular inhibitory amino acid transporter OS=Xenopus laevis GN=slc32a1             |  |   |   |   |   |   |  |      |      |
| Q6PF55                | Actin filament-associated protein 1-like OS=Xenopus laevis GN=afap112                |  |   |   | Y |   |   |  | TRUE | TRUE |
| Q6PF57                | MGC68883 protein OS=Xenopus laevis GN=tbcd16                                         |  |   |   | Y |   |   |  | TRUE | TRUE |

|                        |                                                                                      |   |  |  |   |   |   |      |      |
|------------------------|--------------------------------------------------------------------------------------|---|--|--|---|---|---|------|------|
| Q6PF58                 | MGC68882 protein OS=Xenopus laevis PE=2 SV=1 - [Q6PF58_XENLA]                        |   |  |  |   |   |   |      |      |
| Q6PF64                 | MGC68858 protein OS=Xenopus laevis PE=2 SV=1 - [Q6PF64_XENLA]                        |   |  |  |   |   |   |      |      |
| Q6PF69;CL2844Contig1   | Major vault protein OS=Xenopus laevis GN=mvp                                         |   |  |  |   | Y |   | TRUE | TRUE |
| Q6PF79                 | Ctcf protein OS=Xenopus laevis GN=ctcf                                               |   |  |  |   | Y |   | TRUE | TRUE |
| Q6PF79;CL1865Contig1   | Ctcf protein OS=Xenopus laevis GN=ctcf                                               |   |  |  |   | Y |   | TRUE | TRUE |
| Q6PGS7                 | LOC398432 protein OS=Xenopus laevis GN=c1qbp                                         |   |  |  |   |   |   |      |      |
| Q6PH94;TC467404 UniRef | 40S ribosomal protein S12 OS=Xenopus laevis GN=rps12                                 | Y |  |  | Y |   |   | TRUE | TRUE |
| Q6PHL5;TC440338 UniRef | 60S ribosomal protein L27 OS=Xenopus laevis GN=rpl27                                 |   |  |  |   | Y |   | TRUE | TRUE |
| Q6PHL6                 | Rps19-prov protein OS=Xenopus laevis GN=rps19                                        |   |  |  |   | Y |   | TRUE | TRUE |
| Q6PI76;CL289Contig7    | Rps14-prov protein OS=Xenopus laevis GN=rps14                                        | Y |  |  | Y |   |   | TRUE | TRUE |
| Q6PI79;zeinaSSns_comp3 | Histone H3.3 OS=Xenopus laevis GN=hist33                                             |   |  |  |   |   |   |      |      |
| Q6Q8B0                 | Metaxin 2 OS=Xenopus laevis GN=mtx2                                                  |   |  |  |   | Y |   | TRUE | TRUE |
| Q6S9C2                 | Type 7 adenylyl cyclase (Fragment) OS=Xenopus laevis GN=adcyl7                       |   |  |  |   | Y |   | TRUE | TRUE |
| Q6UEE0                 | Homeodomain protein OS=Xenopus laevis GN=phox2a                                      |   |  |  |   | Y |   | TRUE | TRUE |
| Q6VEU9;CL6200Contig1   | H+ transporting F1 ATP synthase epsilon subunit OS=Xenopus laevis GN=atp5e           |   |  |  |   |   |   |      |      |
| Q6XXZ0                 | Transporter associated with antigen processing OS=Xenopus laevis GN=tap1             |   |  |  |   |   |   |      |      |
| Q6ZXA0                 | Alpha-N-acetylneuraminide alpha-2 sialidase OS=Xenopus laevis GN=st8sia1             |   |  |  |   |   |   |      |      |
| Q708W2                 | Forkhead box protein J1-A OS=Xenopus laevis GN=foxj1                                 |   |  |  |   | Y |   | TRUE | TRUE |
| Q70PC5                 | Importin subunit alpha OS=Xenopus laevis GN=impa5                                    |   |  |  |   |   |   |      |      |
| Q712T4                 | Enhancer of split related 9 OS=Xenopus laevis GN=hes9.1                              |   |  |  |   | Y |   | TRUE | TRUE |
| Q71N44                 | Transcription factor IIA large subunit OS=Xenopus laevis GN=toa1                     |   |  |  |   |   |   |      |      |
| Q71U00                 | S-phase kinase-associated protein 1 OS=Xenopus laevis GN=skp1                        |   |  |  |   | Y |   | TRUE | TRUE |
| Q767H5                 | Serine/threonine protein kinase BRA1 OS=Xenopus laevis GN=braf                       |   |  |  |   |   |   |      |      |
| Q76BK2;CL10087Contig1  | Macrophage migration inhibitory factor OS=Xenopus laevis GN=mif                      |   |  |  |   |   |   |      |      |
| Q76LD3;CL6834Contig1   | DNA polymerase delta p66 subunit OS=Xenopus laevis GN=pold3                          |   |  |  |   | Y |   | TRUE | TRUE |
| Q7LZG8                 | Creatine kinase (Fragment) OS=Xenopus laevis PE=3 SV=1 - [Q7LZG8_XENLA]              |   |  |  |   |   |   |      |      |
| Q7SX80                 | MGC64330 protein OS=Xenopus laevis GN=ctbs                                           |   |  |  |   | Y |   | TRUE | TRUE |
| Q7SY83                 | MGC64447 protein OS=Xenopus laevis PE=2 SV=1 - [Q7SY83_XENLA]                        |   |  |  |   |   |   |      |      |
| Q7SY94                 | ATP synthase subunit alpha OS=Xenopus laevis GN=atp5a1                               |   |  |  |   | Y |   | TRUE | TRUE |
| Q7SY98                 | MGC64309 protein OS=Xenopus laevis PE=2 SV=1 - [Q7SY98_XENLA]                        |   |  |  |   |   |   |      |      |
| Q7SYQ4                 | MGC64582 protein OS=Xenopus laevis GN=prdx6                                          |   |  |  |   |   |   |      |      |
| Q7SYR8                 | Apacd-prov protein OS=Xenopus laevis GN=txndc9                                       |   |  |  |   | Y |   | TRUE | TRUE |
| Q7SYS0                 | Gst13-13-prov protein OS=Xenopus laevis GN=gstk1                                     |   |  |  |   | Y |   | TRUE | TRUE |
| Q7SYT0;CL12198Contig1  | Elongation factor 1-alpha OS=Xenopus laevis GN=eef1a2                                |   |  |  |   | Y |   | TRUE | TRUE |
| Q7SYU3;CL2410Contig2   | MGC64490 protein OS=Xenopus laevis GN=rps5                                           | Y |  |  | Y |   |   | TRUE | TRUE |
| Q7SYV2                 | MGC64465 protein OS=Xenopus laevis GN=pdlim1                                         |   |  |  |   | Y |   | TRUE | TRUE |
| Q7SYV4                 | Vbp1-prov protein OS=Xenopus laevis GN=vbp1                                          |   |  |  |   | Y |   | TRUE | TRUE |
| Q7SYV5                 | MGC64462 protein OS=Xenopus laevis PE=2 SV=1 - [Q7SYV5_XENLA]                        |   |  |  |   |   |   |      |      |
| Q7SYX2;CL10546Contig1  | MGC64421 protein OS=Xenopus laevis GN=serpinb6                                       |   |  |  |   | Y |   | TRUE | TRUE |
| Q7SYX6                 | Cbln2-prov protein OS=Xenopus laevis GN=cbln2                                        |   |  |  |   |   |   |      |      |
| Q7SZ11;CL1890Contig5   | Annexin OS=Xenopus laevis PE=2 SV=1 - [Q7SZ11_XENLA]                                 |   |  |  |   |   |   |      |      |
| Q7SZ14                 | MGC64316 protein OS=Xenopus laevis GN=ndufa9                                         |   |  |  |   | Y |   | TRUE | TRUE |
| Q7SZ19                 | Annexin (Fragment) OS=Xenopus laevis GN=anx                                          |   |  |  |   | Y |   | TRUE | TRUE |
| Q7SZ23;CL10303Contig1  | Gstm2-prov protein OS=Xenopus laevis GN=gstm1                                        |   |  |  |   | Y |   | TRUE | TRUE |
| Q7SZ25                 | Eno1-prov protein OS=Xenopus laevis GN=eno1                                          | Y |  |  | Y |   |   | TRUE | TRUE |
| Q7SZ26;CL2319Contig2   | Peptidyl-prolyl cis-trans isomerase (cytosolic) OS=Xenopus laevis GN=ppib            |   |  |  |   | Y |   | TRUE | TRUE |
| Q7SZ34;CL1198Contig2   | Stathmin OS=Xenopus laevis GN=stmn1                                                  |   |  |  |   | Y |   | TRUE | TRUE |
| Q7SZ43                 | Mylc2a-prov protein OS=Xenopus laevis GN=mylc2a                                      |   |  |  |   |   |   |      |      |
| Q7SZ77;CL50Contig6     | Rps11 protein OS=Xenopus laevis GN=rps11                                             | Y |  |  |   |   |   | TRUE | TRUE |
| Q7SZ87                 | MGC64430 protein OS=Xenopus laevis GN=rpl28                                          |   |  |  |   | Y |   | TRUE | TRUE |
| Q7SZ98                 | Annexin OS=Xenopus laevis PE=2 SV=1 - [Q7SZ98_XENLA]                                 |   |  |  |   |   |   |      |      |
| Q7SZA3                 | MGC64320 protein OS=Xenopus laevis PE=4 SV=1 - [Q7SZA3_XENLA]                        |   |  |  |   |   |   |      |      |
| Q7SZA4                 | 60S ribosomal protein L18 OS=Xenopus laevis GN=rpl18                                 |   |  |  |   | Y |   | TRUE | TRUE |
| Q7SZA5;BJ091434 UniRef | MGC64312 protein OS=Xenopus laevis GN=rpl29                                          |   |  |  |   | Y | Y | TRUE | TRUE |
| Q7SZA8;CL926Contig3    | 60S ribosomal protein L18 OS=Xenopus laevis GN=rpl18                                 | Y |  |  | Y |   |   | TRUE | TRUE |
| Q7SZB0;CL1525Contig1   | Rpl35a-prov protein OS=Xenopus laevis GN=rpl35a                                      |   |  |  |   | Y |   | TRUE | TRUE |
| Q7SZB1                 | Profilin OS=Xenopus laevis GN=PFN1                                                   |   |  |  |   | Y |   | TRUE | TRUE |
| Q7SZB2;CL4738Contig1   | Rpl27a protein OS=Xenopus laevis GN=rpl27a                                           | Y |  |  | Y |   |   | TRUE | TRUE |
| Q7SZB4                 | 60S ribosomal protein L37a OS=Xenopus laevis GN=rpl37a                               |   |  |  |   | Y |   | TRUE | TRUE |
| Q7SZB7;CL391Contig4    | 60S ribosomal protein L18a OS=Xenopus laevis GN=rep18a                               |   |  |  |   |   |   |      |      |
| Q7SZF6                 | Vitellogenin B1 OS=Xenopus laevis GN=vtgb1                                           |   |  |  |   | Y |   | TRUE | TRUE |
| Q7SZJ1                 | Putative OFD1 protein (Fragment) OS=Xenopus laevis GN=ofd1                           |   |  |  |   | Y |   | TRUE | TRUE |
| Q7SZL5                 | Microtubule-associated tumor suppressor OS=Xenopus laevis GN=mtus1                   |   |  |  |   | Y |   | TRUE | TRUE |
| Q7SZS3;CL137Contig1    | Aspartate aminotransferase OS=Xenopus laevis GN=got2                                 |   |  |  |   | Y |   | TRUE | TRUE |
| Q7SZT4;CL25746Contig1  | Rdh1-prov protein OS=Xenopus laevis GN=dhrs9                                         |   |  |  |   | Y |   | TRUE | TRUE |
| Q7SZU3;TC455791 UniRef | Rps10-prov protein OS=Xenopus laevis GN=rps10                                        |   |  |  |   | Y |   | TRUE | TRUE |
| Q7T0N8;CL7665Contig1   | Hadhs-prov protein OS=Xenopus laevis GN=hadh                                         |   |  |  |   | Y | Y | TRUE | TRUE |
| Q7TOR2                 | LOC398682 protein (Fragment) OS=Xenopus laevis GN=OC398682                           |   |  |  |   |   |   |      |      |
| Q7TOR7;CL3918Contig2   | Cn2-prov protein OS=Xenopus laevis GN=cndp2                                          |   |  |  |   | Y | Y | TRUE | TRUE |
| Q7TOR9                 | Rps2e protein OS=Xenopus laevis GN=rps2                                              |   |  |  |   |   |   |      |      |
| Q7TOU6                 | Calcium-binding mitochondrial carrier OS=Xenopus laevis GN=slc25a24                  |   |  |  |   | Y |   | TRUE | TRUE |
| Q7TOV9                 | MGC68941 protein OS=Xenopus laevis GN=asb12                                          |   |  |  |   | Y |   | TRUE | TRUE |
| Q7TOW0;CL2874Contig1   | Dihydropolypol dehydrogenase OS=Xenopus laevis GN=dld                                |   |  |  |   | Y |   | TRUE | TRUE |
| Q7TOW4                 | Vps28-prov protein OS=Xenopus laevis GN=vps28                                        |   |  |  |   | Y |   | TRUE | TRUE |
| Q7T0Y4                 | Dynein regulatory complex protein 1 OS=Xenopus laevis GN=drc1                        |   |  |  |   |   |   |      |      |
| Q7T0Y7;CL7862Contig1   | 2o545 protein OS=Xenopus laevis GN=ccdc25                                            |   |  |  |   |   |   |      |      |
| Q7T106;33416619        | MGC68423 protein OS=Xenopus laevis GN=10a1.1                                         |   |  |  |   | Y |   | TRUE | TRUE |
| Q7T3S2;CL2215Contig4   | PP2A B" subunit PR74 OS=Xenopus laevis GN=ppp2r3a                                    |   |  |  |   | Y |   | TRUE | TRUE |
| Q7ZSY1;CL6511Contig1   | Galectin family xgalectin-VIIa OS=Xenopus laevis GN=lgals3                           |   |  |  |   | Y |   | TRUE | TRUE |
| Q7ZT76                 | IQ motif containing GTPase activating protein OS=Xenopus laevis GN=iqgap2            |   |  |  |   | Y |   | TRUE | TRUE |
| Q7ZTA4                 | Hus1 protein OS=Xenopus laevis GN=hus1                                               |   |  |  |   | Y |   | TRUE | TRUE |
| Q7ZTA9                 | Putative Rho family guanine-nucleotide exchange factor OS=Xenopus laevis GN=arhgef39 |   |  |  |   |   |   |      |      |
| Q7ZTB3;CL289Contig3    | Heat shock protein gpp96 OS=Xenopus laevis GN=hsp90b1                                |   |  |  |   |   |   |      |      |
| Q7ZTJ1;CL468Contig4    | Slc25a3-prov protein OS=Xenopus laevis GN=slc25a3                                    |   |  |  |   | Y |   | TRUE | TRUE |
| Q7ZTJ4                 | Vha55 protein OS=Xenopus laevis GN=atp6v1b2                                          |   |  |  |   | Y |   | TRUE | TRUE |
| Q7ZTK1;CL1176Contig2   | Slc30a1-prov protein OS=Xenopus laevis GN=slc30a1                                    |   |  |  |   | Y |   | TRUE | TRUE |

|                       |                                        |                       |   |  |  |   |   |  |      |      |
|-----------------------|----------------------------------------|-----------------------|---|--|--|---|---|--|------|------|
| Q7ZTK6                | MGC53952 protein OS=Xenopus la         | hspa8                 |   |  |  | Y |   |  | TRUE | TRUE |
| Q7ZTK9;CL7196Contig1  | Aspartate aminotransferase OS=Xe       | got1                  |   |  |  |   |   |  |      |      |
| Q7ZTL1                | Acaa2-prov protein OS=Xenopus la       | acaa2                 |   |  |  | Y |   |  | TRUE | TRUE |
| Q7ZTL5;CL1515Contig2  | Cct8-prov protein OS=Xenopus lae       | cct8                  | Y |  |  | Y |   |  | TRUE | TRUE |
| Q7ZTM0                | Cct5-prov protein OS=Xenopus lae       | cct5                  |   |  |  | Y |   |  | TRUE | TRUE |
| Q7ZTM4;CL120Contig1   | Col2a1b protein OS=Xenopus laeiv       | col2a1b               |   |  |  |   |   |  |      |      |
| Q7ZTM9;CL5086Contig1  | Eukaryotic translation initiation fact | eif3d                 |   |  |  |   |   |  |      |      |
| Q7ZTP0;CL1Contig193   | MGC53359 protein OS=Xenopus la         | tuba3c                |   |  |  | Y |   |  | TRUE | TRUE |
| Q7ZTP2                | Actin-related protein 2-A OS=Xenop     | actr2-a               |   |  |  |   |   |  |      |      |
| Q7ZTP9;CL8426Contig1  | Slc25a20-prov protein OS=Xenopus       | slc25a20              |   |  |  | Y | Y |  | TRUE | TRUE |
| Q7ZTR0                | Wu.fc55e05-prov protein OS=Xenop       | copb2                 |   |  |  | Y |   |  | TRUE | TRUE |
| Q7ZWJ1                | SYNE1 protein (Fragment) OS=Xer        | syne1                 |   |  |  | Y |   |  | TRUE | TRUE |
| Q7ZWJ2                | Uqcr1 protein OS=Xenopus laevis        | uqcr1                 |   |  |  | Y |   |  | TRUE | TRUE |
| Q7ZWK0                | Pck1-prov protein OS=Xenopus lae       | pck1                  |   |  |  | Y |   |  | TRUE | TRUE |
| Q7ZWK4                | LOC398587 protein (Fragment) OS=       | OC398587              |   |  |  |   |   |  |      |      |
| Q7ZWL4                | Chaperone protein DnaJ D OS=Xer        | dnaja2                |   |  |  |   |   |  |      |      |
| Q7ZWN1                | Inosine-5'-monophosphate dehydro       | impdh1                |   |  |  | Y |   |  | TRUE | TRUE |
| Q7ZWN5;CL2685Contig2  | Triosephosphate isomerase OS=Xe        | tpi1                  |   |  |  | Y |   |  | TRUE | TRUE |
| Q7ZWN8                | LOC398560 protein (Fragment) OS=       | OC398560              |   |  |  |   |   |  |      |      |
| Q7ZWP4;CL57Contig2    | MGC53205 protein OS=Xenopus la         | tubb4a                |   |  |  |   |   |  |      |      |
| Q7ZWP8;CL6523Contig2  | DNA topoisomerase OS=Xenopus la        | top3b                 |   |  |  | Y |   |  | TRUE | TRUE |
| Q7ZWQ0                | Ribonucleoside-diphosphate reduct      | rrm1                  |   |  |  | Y |   |  | TRUE | TRUE |
| Q7ZWR3                | Padi2-prov protein OS=Xenopus lae      | padi2                 |   |  |  |   |   |  |      |      |
| Q7ZWR6                | ATP synthase subunit beta OS=Xer       | atp5b                 |   |  |  | Y |   |  | TRUE | TRUE |
| Q7ZWS4                | MGC53764 protein OS=Xenopus la         | rpn2                  |   |  |  | Y |   |  | TRUE | TRUE |
| Q7ZWS8;CL1187Contig2  | Tagln2-prov protein OS=Xenopus la      | tagln2                |   |  |  | Y |   |  | TRUE | TRUE |
| Q7ZWU1;CL4166Contig1  | Stip1-prov protein OS=Xenopus lae      | stip1                 |   |  |  | Y |   |  | TRUE | TRUE |
| Q7ZWU3;CL1744Contig1  | Grp58-prov protein OS=Xenopus la       | pdia3                 | Y |  |  |   |   |  | TRUE | TRUE |
| Q7ZWW0;CL4305Contig3  | Kin-1-prov protein OS=Xenopus lae      | prkacb                |   |  |  | Y | Y |  | TRUE | TRUE |
| Q7ZWW1                | Ddx19-prov protein OS=Xenopus la       | ddx19b                |   |  |  | Y |   |  | TRUE | TRUE |
| Q7ZWW3;CL7106Contig1  | Ferritin OS=Xenopus laevis PE=2 S      | ftth                  |   |  |  |   |   |  |      |      |
| Q7ZWW5                | Abcf2-prov protein OS=Xenopus lae      | abcf2                 |   |  |  | Y |   |  | TRUE | TRUE |
| Q7ZWX9                | Midnolin-B OS=Xenopus laevis GN=       | midn                  |   |  |  | Y |   |  | TRUE | TRUE |
| Q7ZWY6                | Rpl9-prov protein OS=Xenopus lae       | rpl9                  |   |  |  | Y |   |  | TRUE | TRUE |
| Q7ZWZ7;CL2318Contig1  | Ribosomal protein L15 OS=Xenopu        | rpl15                 |   |  |  | Y |   |  | TRUE | TRUE |
| Q7ZWZ9;CL4310Contig2  | Dnm1-prov protein OS=Xenopus la        | dnm1                  |   |  |  |   |   |  |      |      |
| Q7ZX03                | Forkhead box protein K2 OS=Xenop       | foxx2                 |   |  |  | Y |   |  | TRUE | TRUE |
| Q7ZX18                | MGC53357 protein OS=Xenopus la         | rhgap11a.1            |   |  |  |   |   |  |      |      |
| Q7ZX22;CL5682Contig1  | WD repeat-containing protein 24 OS     | wdr24                 |   |  |  | Y |   |  | TRUE | TRUE |
| Q7ZX27                | Palmdelphin OS=Xenopus laevis G        | palmd                 |   |  |  |   |   |  |      |      |
| Q7ZX29;CL3649Contig1  | Dia1 protein OS=Xenopus laevis G       | cytb5r3               |   |  |  |   |   |  |      |      |
| Q7ZX30                | Spx-prov protein OS=Xenopus laevi      | sf3b4                 |   |  |  | Y | Y |  | TRUE | TRUE |
| Q7ZX34;CL3654Contig2  | MGC52616 protein OS=Xenopus la         | hhspa9                | Y |  |  |   |   |  | TRUE | TRUE |
| Q7ZX44;CL2985Contig2  | Txndc5-prov protein OS=Xenopus la      | txndc5                |   |  |  | Y |   |  | TRUE | TRUE |
| Q7ZX69;CL1735Contig1  | MGC52894 protein OS=Xenopus la         | MGC52894              |   |  |  |   |   |  |      |      |
| Q7ZX74                | MGC53501 protein OS=Xenopus la         | ccdc6                 |   |  |  |   |   |  |      |      |
| Q7ZX81                | MGC54008 protein OS=Xenopus la         | cyp2c8.1              |   |  |  |   |   |  |      |      |
| Q7ZX92;CL5540Contig2  | MGC80929 protein OS=Xenopus la         | psmd14                |   |  |  | Y |   |  | TRUE | TRUE |
| Q7ZX99                | Tia1 protein (Fragment) OS=Xenop       | Tia1                  |   |  |  | Y |   |  | TRUE | TRUE |
| Q7ZXB9;CL335Contig7   | Faf1-prov protein OS=Xenopus lae       | faf1                  |   |  |  | Y |   |  | TRUE | TRUE |
| Q7ZXF1                | Myotubularin-related protein 4 OS=)    | mtmr4                 |   |  |  | Y |   |  | TRUE | TRUE |
| Q7ZXF3;zeinaSSns_comp | DNA-binding protein inhibitor ID-4 C   | id4                   |   |  |  | Y |   |  | TRUE | TRUE |
| Q7ZXG1                | Smarca1 protein (Fragment) OS=Xe       | smarcd1               |   |  |  | Y |   |  | TRUE | TRUE |
| Q7ZXG3;CL107Contig4   | Iff-2-prov protein OS=Xenopus lae      | eif5a                 | Y |  |  | Y |   |  | TRUE | TRUE |
| Q7ZXG7;CL54Contig1    | Guanidinoacetate N-methyltransfer      | gamt                  |   |  |  | Y |   |  | TRUE | TRUE |
| Q7ZXH6;CL593Contig5   | Ywhaq-prov protein OS=Xenopus la       | ywhaq                 |   |  |  |   |   |  | TRUE | TRUE |
| Q7ZXI2                | Slit1 protein OS=Xenopus laevis G      | slit1                 |   |  |  | Y |   |  | TRUE | TRUE |
| Q7ZXI5;CL2254Contig3  | Snf protein OS=Xenopus laevis GN=      | snrpa                 |   |  |  | Y |   |  | TRUE | TRUE |
| Q7ZXK4                | Rpl10-prov protein OS=Xenopus lae      | rpl10                 |   |  |  | Y |   |  | TRUE | TRUE |
| Q7ZXM6                | Sfrp2-prov protein OS=Xenopus lae      | sfrp2                 |   |  |  | Y |   |  | TRUE | TRUE |
| Q7ZXM8;CL3609Contig1  | Ferritin OS=Xenopus laevis GN=ftm      | ftmt                  |   |  |  | Y |   |  | TRUE | TRUE |
| Q7ZXP0;CL3911Contig1  | Twinfilin-2-A OS=Xenopus laevis G      | twf2                  |   |  |  | Y |   |  | TRUE | TRUE |
| Q7ZXP5                | Mct3-prov protein OS=Xenopus lae       | slc16a3               |   |  |  | Y |   |  | TRUE | TRUE |
| Q7ZXP8                | Eef2-prov protein OS=Xenopus lae       | eef2.1                | Y |  |  | Y |   |  | TRUE | TRUE |
| Q7ZXT0                | Egfl7 protein OS=Xenopus laevis G      | egfl7                 |   |  |  |   |   |  |      |      |
| Q7ZXU1                | Chc1-prov protein OS=Xenopus lae       | rcbtb2                |   |  |  | Y |   |  | TRUE | TRUE |
| Q7ZXV2;CL1735Contig3  | MGC52808 protein OS=Xenopus la         | rpn1                  |   |  |  | Y |   |  | TRUE | TRUE |
| Q7ZXX4;CL6920Contig1  | MGC52697 protein OS=Xenopus la         | aldh9a1               |   |  |  |   |   |  |      |      |
| Q7ZXZ0                | Zygotic DNA replication licensing fa   | mcm3                  |   |  |  | Y |   |  | TRUE | TRUE |
| Q7ZY16;CL9256Contig2  | Adsl-prov protein OS=Xenopus lae       | adsl                  |   |  |  | Y |   |  | TRUE | TRUE |
| Q7ZY19                | MGC53409 protein OS=Xenopus lae        | SV=1 - [Q7ZY19_XENLA] |   |  |  |   |   |  |      |      |
| Q7ZY24;CL67Contig8    | Hmgb3-prov protein OS=Xenopus la       | hmgb3                 |   |  |  | Y |   |  | TRUE | TRUE |
| Q7ZY48                | Rpl13a-prov protein OS=Xenopus la      | rpl13a                |   |  |  | Y |   |  | TRUE | TRUE |
| Q7ZY50                | MGC53997 protein OS=Xenopus lae        | SV=1 - [Q7ZY50_XENLA] | Y |  |  |   |   |  | TRUE | TRUE |
| Q7ZY51                | Profilin (Fragment) OS=Xenopus la      | MGC64293              |   |  |  |   |   |  |      |      |
| Q7ZY52                | Glyceraldehyde-3-phosphate dehyd       | gapdh                 |   |  |  | Y | Y |  | TRUE | TRUE |
| Q7ZY57                | Eif2s3-prov protein OS=Xenopus la      | eif2s3                |   |  |  | Y |   |  | TRUE | TRUE |
| Q7ZY58                | MGC53995 protein OS=Xenopus la         | cdc73                 |   |  |  | Y |   |  | TRUE | TRUE |
| Q7ZY63                | CBTF122 protein (Fragment) OS=X        | cbtf122               |   |  |  |   |   |  |      |      |
| Q7ZY81                | Nucleosome assembly protein 1-like     | nap111                |   |  |  | Y |   |  | TRUE | TRUE |
| Q7ZY84                | LOC398446 protein (Fragment) OS=       | OC398446              |   |  |  |   |   |  |      |      |
| Q7ZY92                | Lect1-prov protein OS=Xenopus lae      | lect1                 |   |  |  |   |   |  |      |      |
| Q7ZY93                | Methionine aminopeptidase OS=Xe        | map                   |   |  |  |   |   |  |      |      |
| Q7ZYA3                | Pgm2-prov protein OS=Xenopus lae       | pgm1                  |   |  |  | Y |   |  | TRUE | TRUE |
| Q7ZYA5;CL6725Contig1  | Interferon-inducible double strande    | prkra                 |   |  |  |   |   |  |      |      |
| Q7ZYA6                | Protein CDV3 homolog A OS=Xeno         | cdv3                  |   |  |  | Y |   |  | TRUE | TRUE |

|                       |                                                |                                         |  |   |  |   |   |  |      |      |
|-----------------------|------------------------------------------------|-----------------------------------------|--|---|--|---|---|--|------|------|
| Q7ZYB2;CL6160Contig1  | PR domain zinc finger protein 4 OS=            | prdm4                                   |  |   |  | Y |   |  | TRUE | TRUE |
| Q7ZYE5;CL5229Contig2  | Rheb-prov protein OS=Xenopus lae               | rheb                                    |  |   |  | Y |   |  | TRUE | TRUE |
| Q7ZYE8;CL6531Contig1  | Tyrp1-prov protein OS=Xenopus lae              | tyrp1                                   |  |   |  | Y |   |  | TRUE | TRUE |
| Q7ZYF2;CL1415Contig2  | Translationally-controlled tumor pro           | tpt1                                    |  |   |  | Y |   |  | TRUE | TRUE |
| Q7ZYF4                | Gfpt1-prov protein OS=Xenopus lae              | gfpt2                                   |  |   |  | Y |   |  | TRUE | TRUE |
| Q7ZYF5                | Calponin OS=Xenopus laevis GN=c                | cnn3                                    |  |   |  |   |   |  |      |      |
| Q7ZYF6                | Bag3-A protein OS=Xenopus laevis               | bag3                                    |  |   |  |   |   |  |      |      |
| Q7ZYF7;CL1612Contig4  | MGC53103 protein OS=Xenopus la                 | phb                                     |  | Y |  |   |   |  | TRUE | TRUE |
| Q7ZYG7;CL1321Contig1  | Ap2b1-prov protein OS=Xenopus la               | ap2b1                                   |  |   |  | Y |   |  | TRUE | TRUE |
| Q7ZYH3;CL653Contig1   | Phf12-prov protein OS=Xenopus lae              | phf12                                   |  |   |  | Y |   |  | TRUE | TRUE |
| Q7ZYH4                | Brd2-A-prov protein (Fragment) OS              | brd2a                                   |  |   |  | Y |   |  | TRUE | TRUE |
| Q7ZYH7;CL3329Contig1  | Pgk1-prov protein OS=Xenopus lae               | pgk1                                    |  |   |  | Y |   |  | TRUE | TRUE |
| Q7ZYI2;CL621Contig2   | MGC52980 protein OS=Xenopus laevis             | PE=2 SV=1 - [Q7ZYI2_XENLA]              |  |   |  |   |   |  |      |      |
| Q7ZYI5;CL3906Contig2  | Baf53a-pending-prov protein OS=X               | actf6a                                  |  |   |  |   |   |  |      |      |
| Q7ZYJ1                | Pctk2-prov protein OS=Xenopus lae              | cdk17                                   |  |   |  | Y |   |  | TRUE | TRUE |
| Q7ZYL1;CL5426Contig2  | Proteasome subunit beta type OS=               | psmb1                                   |  |   |  |   |   |  |      |      |
| Q7ZYL5                | Kinesin-like protein KIF22-B OS=Xe             | kif22                                   |  |   |  | Y |   |  | TRUE | TRUE |
| Q7ZYM3;CL5801Contig1  | Gpd1 protein OS=Xenopus laevis G               | gpd1                                    |  |   |  | Y |   |  | TRUE | TRUE |
| Q7ZYM5                | Sdcbp protein OS=Xenopus laevis (              | sdcbp                                   |  |   |  |   |   |  |      |      |
| Q7ZYP4                | Ldb3-prov protein OS=Xenopus lae               | ldb3                                    |  |   |  |   |   |  |      |      |
| Q7ZYP5                | MGC52698 protein OS=Xenopus la                 | cirh1a                                  |  |   |  | Y |   |  | TRUE | TRUE |
| Q7ZYP8                | LOC495278 protein (Fragment) OS=Xenopus laevis | GN=LOC495278 PE=2 SV=1 - [Q7ZYP8_XENLA] |  |   |  |   |   |  |      |      |
| Q7ZYQ8                | 60S ribosomal protein L18a (Fragm              | rep18a                                  |  |   |  |   |   |  |      |      |
| Q7ZYQ9;CL1Contig431   | Ckm-prov protein OS=Xenopus lae                | ckm                                     |  |   |  |   |   |  |      |      |
| Q7ZYR1                | Rpl3-prov protein OS=Xenopus lae               | rpl3                                    |  |   |  |   |   |  |      |      |
| Q7ZYS1;CL555Contig6   | 60S ribosomal protein L19 OS=Xen               | rpl19                                   |  |   |  | Y |   |  | TRUE | TRUE |
| Q7ZYS4;CL2863Contig4  | MGC53685 protein OS=Xenopus la                 | MGC53685                                |  |   |  |   |   |  | TRUE | TRUE |
| Q7ZYS8;CL560Contig6   | 60S ribosomal protein L10a OS=Xe               | rpl10a                                  |  | Y |  | Y |   |  | TRUE | TRUE |
| Q7ZYT3                | Rpls3-b protein OS=Xenopus laevis              | rpls3                                   |  |   |  |   |   |  |      |      |
| Q7ZYU4;TC433567 UniRe | Rps9-prov protein OS=Xenopus lae               | rps9                                    |  | Y |  | Y |   |  | TRUE | TRUE |
| Q801Q1                | MGC53743 protein OS=Xenopus la                 | rrp1b                                   |  |   |  | Y |   |  | TRUE | TRUE |
| Q801Q2;CL2424Contig1  | Dtx2 protein OS=Xenopus laevis G               | dtx2                                    |  |   |  | Y |   |  | TRUE | TRUE |
| Q801Q9;CL7416Contig1  | Nkx3-1 protein OS=Xenopus laevis               | nkx31                                   |  |   |  |   |   |  |      |      |
| Q801S2;CL3774Contig1  | Succinate dehydrogenase [ubiquino              | sdha                                    |  |   |  |   |   |  |      |      |
| Q801S3                | 40S ribosomal protein S3a-A OS=X               | rps3a                                   |  | Y |  | Y |   |  | TRUE | TRUE |
| Q801S7                | Uba1a protein OS=Xenopus laevis (              | uba1a                                   |  |   |  |   |   |  |      |      |
| Q801T6                | Alpha-1,4 glucan phosphorylase OS              | pygm                                    |  |   |  | Y |   |  | TRUE | TRUE |
| Q802B6;CL539Contig1   | Add1-a protein OS=Xenopus laevis               | add1                                    |  |   |  |   |   |  |      |      |
| Q802B7;CL5322Contig1  | Ndufs1-prov protein OS=Xenopus la              | ndufs1                                  |  |   |  | Y |   |  | TRUE | TRUE |
| Q802C1                | Gm-prov protein OS=Xenopus lae                 | gm                                      |  |   |  | Y |   |  | TRUE | TRUE |
| Q804I2                | Germes OS=Xenopus laevis GN=LOC                | OC398520                                |  |   |  |   |   |  |      |      |
| Q860P5;CL387Contig2   | Bat2-prov protein OS=Xenopus lae               | prrc2a                                  |  |   |  | Y |   |  | TRUE | TRUE |
| Q8AVB5                | Sfrs1 protein (Fragment) OS=Xenop              | sfrs1                                   |  |   |  |   |   |  |      |      |
| Q8AVB7;CL2995Contig1  | Cct2-prov protein OS=Xenopus lae               | cct2                                    |  | Y |  |   | Y |  | TRUE | TRUE |
| Q8AVC0                | Shmt1 protein OS=Xenopus laevis (              | shmt1                                   |  |   |  |   | Y |  | TRUE | TRUE |
| Q8AVC0;CL7997Contig2  | Shmt1 protein OS=Xenopus laevis (              | shmt1                                   |  |   |  |   |   |  |      |      |
| Q8AVD0                | MGC53232 protein OS=Xenopus laevis             | PE=2 SV=1 - [Q8AVD0_XENLA]              |  |   |  |   |   |  |      |      |
| Q8AVD3;CL1995Contig2  | Adenylate kinase 2, mitochondrial C            | ak2                                     |  |   |  | Y | Y |  | TRUE | TRUE |
| Q8AVD7;CL3574Contig1  | Ndufv1 protein OS=Xenopus laevis               | ndufv1                                  |  |   |  |   |   |  |      |      |
| Q8AVE2;CL52Contig20   | Hsc70 protein OS=Xenopus laevis (              | hspa11                                  |  |   |  |   |   |  |      |      |
| Q8AVE3;CL2028Contig2  | Hspa5 protein OS=Xenopus laevis (              | hspa5                                   |  |   |  | Y |   |  | TRUE | TRUE |
| Q8AVE7;CL3384Contig1  | 1i973-prov protein OS=Xenopus lae              | gnl2                                    |  |   |  | Y |   |  | TRUE | TRUE |
| Q8AVF2;CL8795Contig2  | MGC52738 protein OS=Xenopus la                 | tom111                                  |  |   |  | Y | Y |  | TRUE | TRUE |
| Q8AVF3                | LOC398536 protein (Fragment) OS=               | OC398536                                |  |   |  |   |   |  |      |      |
| Q8AVG7                | Cdc20 protein OS=Xenopus laevis (              | cdc20                                   |  |   |  | Y |   |  | TRUE | TRUE |
| Q8AVH1;CL1313Contig1  | Histone-binding protein RBBP7 OS=              | rbbp7                                   |  |   |  | Y |   |  | TRUE | TRUE |
| Q8AVH2;TC421129 UniRe | Ckb-prov protein OS=Xenopus lae                | ckb                                     |  | Y |  | Y |   |  | TRUE | TRUE |
| Q8AVI3                | Arbp-prov protein OS=Xenopus lae               | rplp0                                   |  |   |  | Y |   |  | TRUE | TRUE |
| Q8AVI7;CL1548Contig4  | Rpl5-b protein OS=Xenopus laevis (             | rpl5                                    |  |   |  |   |   |  |      |      |
| Q8AVL1                | MGC53953 protein OS=Xenopus laevis             | PE=2 SV=1 - [Q8AVL1_XENLA]              |  |   |  |   |   |  |      |      |
| Q8AVM7                | Basic leucine zipper and W2 domain             | bwz1                                    |  |   |  |   |   |  |      |      |
| Q8AVM7;CL215Contig8   | Basic leucine zipper and W2 domain             | bwz1                                    |  |   |  |   |   |  |      |      |
| Q8AVN3                | Kiaa0010-prov protein OS=Xenopus               | ube3c                                   |  |   |  | Y |   |  | TRUE | TRUE |
| Q8AVN8;CL1362Contig1  | Cdc37-prov protein OS=Xenopus la               | cdc37                                   |  |   |  | Y |   |  | TRUE | TRUE |
| Q8AVP8;CL8Contig14    | Peptidyl-prolyl cis-trans isomerase (          | ppia                                    |  | Y |  | Y |   |  | TRUE | TRUE |
| Q8AVR4                | Programmed cell death protein 10 C             | pdcd10                                  |  |   |  | Y |   |  | TRUE | TRUE |
| Q8AVR6                | Hspc177-prov protein OS=Xenopus                | chmp5                                   |  |   |  | Y |   |  | TRUE | TRUE |
| Q8AVS4                | Transcriptional activator protein Pur          | purbb                                   |  |   |  |   |   |  |      |      |
| Q8AVT0                | MGC53543 protein OS=Xenopus la                 | eno1                                    |  |   |  | Y |   |  | TRUE | TRUE |
| Q8AVT1                | Paics-prov protein OS=Xenopus lae              | paics                                   |  |   |  |   |   |  |      |      |
| Q8AVU2                | Ubiquitin-conjugating enzyme E2 S-             | ube2sb                                  |  |   |  |   | Y |  | TRUE | TRUE |
| Q8AVV6                | SOSS complex subunit C OS=Xenop                | inip                                    |  |   |  |   |   |  |      |      |
| Q8AVW0;CL561Contig9   | Rpl12-prov protein OS=Xenopus lae              | rpl12                                   |  | Y |  | Y |   |  | TRUE | TRUE |
| Q8AVW5;CL253Contig3   | Ywhaz-prov protein OS=Xenopus la               | ywhaz                                   |  |   |  | Y |   |  | TRUE | TRUE |
| Q8AVX2;CL1548Contig2  | Rpl5-a protein OS=Xenopus laevis (             | rpl5                                    |  |   |  |   |   |  |      |      |
| Q8AX84                | FUSE binding protein-like protein O            | fubp1                                   |  |   |  | Y |   |  | TRUE | TRUE |
| Q8AX85                | RNA-binding protein VgRBP71 OS=                | Khsrp                                   |  |   |  | Y |   |  | TRUE | TRUE |
| Q8AXY7                | Pygopus-2beta OS=Xenopus laevis                | pygo2b                                  |  |   |  |   |   |  |      |      |
| Q8AY70;CL7950Contig1  | Glyceraldehyde-3-phosphate dehyd               | gapdhb                                  |  | Y |  |   |   |  | TRUE | TRUE |
| Q8JH73                | Integral membrane nucleoporin gp2              | gp210                                   |  |   |  |   |   |  |      |      |
| Q8JHA7;CL8144Contig1  | Glutathione s-transferase OS=Xeno              | gst                                     |  | Y |  |   |   |  | TRUE | TRUE |
| Q8QFR2                | Protein HIRA OS=Xenopus laevis G               | hira                                    |  |   |  | Y |   |  | TRUE | TRUE |
| Q8QFV1                | Isthmin OS=Xenopus laevis GN=ist               | ism1                                    |  |   |  | Y |   |  | TRUE | TRUE |
| Q8QFW7;CL1631Contig2  | Ribosomal protein L34 OS=Xenopu                | rpl34                                   |  |   |  |   |   |  |      |      |
| Q8QFX3                | Myeloperoxidase, peroxidase 2' OS              | mpo                                     |  |   |  |   |   |  |      |      |
| Q8QG78                | Nuclear receptor corepressor 1 OS=             | ncor1                                   |  |   |  | Y |   |  | TRUE | TRUE |

|                       |                                                                                          |          |   |  |  |   |   |   |  |      |      |
|-----------------------|------------------------------------------------------------------------------------------|----------|---|--|--|---|---|---|--|------|------|
| Q8QHA5;CL6103Contig1  | DNA replication ATP-dependent hel                                                        | dna2     |   |  |  | Y |   |   |  | TRUE | TRUE |
| Q8UUU4                | Sp1-like zinc-finger protein XSPR-2                                                      | sp5l     |   |  |  |   |   |   |  |      |      |
| Q8UVD5                | Semaphorin 4C (Fragment) OS=Xe                                                           | sema4c   |   |  |  | Y |   |   |  | TRUE | TRUE |
| Q8UVR5                | Bromodomain adjacent to zinc finge                                                       | baz1a    |   |  |  | Y |   |   |  | TRUE | TRUE |
| Q8UW77;CL1026Contig6  | XEB1B OS=Xenopus laevis GN=ma                                                            | mapre1   |   |  |  | Y |   |   |  | TRUE | TRUE |
| Q8WMM44               | MHC class II antigen alpha chain D                                                       | dbag2    |   |  |  |   |   |   |  |      |      |
| Q90X16;CL10849Contig1 | Annexin OS=Xenopus laevis GN=ar                                                          | anxa4    |   |  |  | Y |   |   |  | TRUE | TRUE |
| Q90X20                | Aryl hydrocarbon receptor nuclear tr                                                     | arnt     |   |  |  | Y |   |   |  | TRUE | TRUE |
| Q90XW5                | Iroquois-class homeodomain protei                                                        | irx5     |   |  |  |   |   |   |  |      |      |
| Q90YE5;CL4860Contig2  | MAD, mothers against decapentapl                                                         | smad3    |   |  |  | Y |   |   |  | TRUE | TRUE |
| Q90Z06                | Prickle-like protein 1-A OS=Xenopu                                                       | prickle1 |   |  |  |   |   |   |  |      |      |
| Q90Z58;CL11161Contig1 | Chisel OS=Xenopus laevis GN=sm                                                           | smpx     |   |  |  |   |   |   |  |      |      |
| Q90ZB7                | Lymphoid enhancer factor XLEF-1B                                                         | lef1     |   |  |  | Y |   |   |  | TRUE | TRUE |
| Q90ZL4                | Lissencephaly-1 homolog OS=Xenc                                                          | pafah1b1 |   |  |  | Y |   |   |  | TRUE | TRUE |
| Q91375                | Elongation factor 1-gamma-B OS=X                                                         | eef1gb   | Y |  |  |   |   |   |  | TRUE | TRUE |
| Q91560                | RNA exonuclease 4 OS=Xenopus la                                                          | rexo4    |   |  |  | Y |   |   |  | TRUE | TRUE |
| Q91573                | Mineralocorticoid receptor (Fragme                                                       | nr3c2    |   |  |  | Y |   |   |  | TRUE | TRUE |
| Q91579                | CUGBP Elav-like family member 3-                                                         | tnrc4    |   |  |  |   |   |   |  |      |      |
| Q91593                | Potassium channel alpha subunit K                                                        | kcnb1    |   |  |  |   |   |   |  |      |      |
| Q91598                | Growth associated protein GAP-43                                                         | gap43    |   |  |  |   |   |   |  |      |      |
| Q91615                | Insulin receptor substrate 1-A OS=X                                                      | irs1     |   |  |  | Y |   |   |  | TRUE | TRUE |
| Q91624;CL52Contig10   | Heat shock cognate 70.I OS=Xenop                                                         | hsc70    |   |  |  |   |   |   |  |      |      |
| Q91660                | Zinc finger protein GLI3 OS=Xenop                                                        | gli3     |   |  |  | Y |   |   |  | TRUE | TRUE |
| Q91684                | DNA polymerase subunit gamma-1                                                           | polg     |   |  |  | Y |   |   |  | TRUE | TRUE |
| Q91685                | Homeobox protein Mix.2 OS=Xenop                                                          | mix2     |   |  |  |   |   |   |  |      |      |
| Q91687                | Integrin alpha-4 OS=Xenopus laevis                                                       | itga4    |   |  |  | Y |   |   |  | TRUE | TRUE |
| Q91717;CL120Contig7   | Collagen alpha-1(II) chain OS=Xenc                                                       | col2a1   |   |  |  | Y |   |   |  | TRUE | TRUE |
| Q91733                | EEF1D protein OS=Xenopus laevis                                                          | eef1d    |   |  |  | Y | Y |   |  | TRUE | TRUE |
| Q91749                | Oviduct specific protein-1A OS=Xer                                                       | fosp1a   |   |  |  |   |   |   |  |      |      |
| Q91757                | Glycogen synthase kinase-3 beta O                                                        | gsk3b    |   |  |  | Y |   | Y |  | TRUE | TRUE |
| Q91785                | Kinesin-like protein KIF15-A OS=Xe                                                       | kif15    |   |  |  | Y |   |   |  | TRUE | TRUE |
| Q91804                | NMDA receptor (Fragment) OS=Xe                                                           | nr1      |   |  |  |   |   |   |  |      |      |
| Q91819                | Aurora kinase A-B OS=Xenopus lae                                                         | aurka    |   |  |  | Y |   |   |  | TRUE | TRUE |
| Q91829                | V(D)J recombination-activating prot                                                      | rag1     |   |  |  |   |   |   |  |      |      |
| Q91840;CL994Contig4   | Retinoid X receptor beta OS=Xenop                                                        | rxrb     |   |  |  |   |   |   |  |      |      |
| Q91868                | Rat translocon-associated protein d                                                      | ssr4     |   |  |  | Y |   |   |  | TRUE | TRUE |
| Q91896;CL253Contig8   | 14-3-3 protein zeta OS=Xenopus la                                                        | ywhaz    |   |  |  | Y |   |   |  | TRUE | TRUE |
| Q91902;CL279Contig2   | Delta-like protein OS=Xenopus laevis                                                     | dli      |   |  |  |   |   |   |  |      |      |
| Q91926                | Homeobox protein vent1 OS=Xenop                                                          | vent1    |   |  |  |   |   |   |  |      |      |
| Q92122;CL1152Contig2  | Pyruvate kinase muscle isozyme OS                                                        | vtga2    |   |  |  | Y |   |   |  | TRUE | TRUE |
| Q98SG0                | Beta-amyloid protein A OS=Xenopu                                                         | app      |   |  |  |   |   |   |  |      |      |
| Q98SP8                | Embryonic polyadenylate-binding pr                                                       | epabp-a  |   |  |  |   |   |   |  |      |      |
| Q98SU0                | K-CI cotransporter (Fragment) OS=X                                                       | kcc      |   |  |  |   |   |   |  |      |      |
| Q98T92                | Mps1/TTK OS=Xenopus laevis GN=                                                           | tkk      |   |  |  | Y |   |   |  | TRUE | TRUE |
| Q98TW0                | Protein kinase Cds1 OS=Xenopus la                                                        | Cds1     |   |  |  | Y |   |   |  | TRUE | TRUE |
| Q98UD5                | Collagen alpha1(IV) (Fragment) OS                                                        | col4a1   |   |  |  |   |   |   |  |      |      |
| Q9DDA3                | RalB-binding protein (Fragment) OS                                                       | riip1    |   |  |  |   |   |   |  |      |      |
| Q9DDN8                | Gravin-like OS=Xenopus laevis GN=                                                        | akap12   |   |  |  | Y |   |   |  | TRUE | TRUE |
| Q9DE14                | Serine/threonine-protein kinase atr                                                      | atr      |   |  |  | Y |   |   |  | TRUE | TRUE |
| Q9DE56                | Ribonucleoside-diphosphate reduct                                                        | rrm1     |   |  |  |   |   |   |  | TRUE | TRUE |
| Q9DED4;TC439103 UniRe | Cold-inducible RNA-binding protein                                                       | cirbp    | Y |  |  | Y |   |   |  | TRUE | TRUE |
| Q9DEF3                | Patched-2 OS=Xenopus laevis GN=                                                          | ptch2    |   |  |  | Y |   |   |  | TRUE | TRUE |
| Q9DEF7                | Serine/threonine-protein phosphata                                                       | ppp      |   |  |  |   |   |   |  |      |      |
| Q9DFC2                | Homeobox protein XHox11L2 OS=X                                                           | tlx3     |   |  |  | Y |   |   |  | TRUE | TRUE |
| Q9DGF4                | Prox 1 protein OS=Xenopus laevis                                                         | prox1    |   |  |  |   |   | Y |  | TRUE | TRUE |
| Q9I8J7;CL4267Contig1  | MGC69114 protein OS=Xenopus la                                                           | tkl2     | Y |  |  | Y |   |   |  | TRUE | TRUE |
| Q9I8P8;CL2106Contig1  | FK506-binding protein OS=Xenopus                                                         | fkbp10   |   |  |  | Y |   |   |  | TRUE | TRUE |
| Q9I905;CL4858Contig1  | MGC64562 protein OS=Xenopus la                                                           | mtch2    |   |  |  |   |   |   |  |      |      |
| Q9I9B1                | Olfactory receptor (Fragment) OS=X                                                       | xb3      |   |  |  |   |   |   |  |      |      |
| Q9I9K0                | Zinc finger protein ZFPM1 (Fragme                                                        | zfpm1    |   |  |  | Y |   |   |  | TRUE | TRUE |
| Q9I9L2                | Cbl proto-oncogene protein (Fragm                                                        | Cbl      |   |  |  |   |   |   |  |      |      |
| Q9I9M9                | Adenine nucleotide translocase OS                                                        | slc25a5  |   |  |  | Y | Y |   |  | TRUE | TRUE |
| Q9IAB1                | Putative uncharacterized protein (Fragment) OS=Xenopus laevis PE=2 SV=1 - [Q9IAB1_XENLA] |          |   |  |  |   |   |   |  |      |      |
| Q9IAI8                | Receptor protein tyrosine phosphata                                                      | crypa    |   |  |  |   |   |   |  |      |      |
| Q9IAJ7;CL4522Contig2  | ATP synthase subunit B OS=Xenop                                                          | atp5f1   |   |  |  | Y |   |   |  | TRUE | TRUE |
| Q9IBC8                | T-box transcription factor TBX2-A O                                                      | tbx2     |   |  |  | Y |   |   |  | TRUE | TRUE |
| Q9IBF6                | Prolactin receptor OS=Xenopus lae                                                        | prlr     |   |  |  |   |   |   |  |      |      |
| Q9IBG7                | Kiellin/chordin-like protein OS=Xeno                                                     | kcp      |   |  |  | Y |   |   |  | TRUE | TRUE |
| Q9PSN9                | Lipovitellin 1, PCDZN=ZN(2+)- and                                                        | pcdzn    |   |  |  |   |   |   |  |      |      |
| Q9PSP4                | RAN-interacting protein P10 (Fragm                                                       | ranbp10  |   |  |  |   |   | Y |  | TRUE | TRUE |
| Q9PSQ7                | PNIXA, EP45=NI(2+)-binding serpin                                                        | pnixa    |   |  |  |   |   |   |  |      |      |
| Q9PSX0;CL3505Contig1  | Fructose-bisphosphate aldolase OS                                                        | aldoc    |   |  |  | Y |   |   |  | TRUE | TRUE |
| Q9PTE5                | Phosphoinositide 3 kinase catalytic                                                      | pik3c    |   |  |  |   |   |   |  |      |      |
| Q9PTG8                | Transforming acidic coiled-coil-cont                                                     | tacc3    |   |  |  | Y |   |   |  | TRUE | TRUE |
| Q9PTK6                | Fatvg OS=Xenopus laevis GN=fatvg                                                         | fatvg    |   |  |  |   |   |   |  |      |      |
| Q9PUU6                | Frizzled-2 OS=Xenopus laevis GN=                                                         | fzd2     |   |  |  | Y |   |   |  | TRUE | TRUE |
| Q9PVQ1                | Proteasome subunit alpha type-7-B                                                        | psma7    |   |  |  | Y |   |   |  | TRUE | TRUE |
| Q9PVY6;CL2696Contig1  | Proteasome subunit alpha type-7-A                                                        | psma7    |   |  |  | Y |   |   |  | TRUE | TRUE |
| Q9PVY8                | Forkhead box protein C2-B OS=Xer                                                         | foxc2b   |   |  |  |   |   |   |  |      |      |
| Q9PWH0                | Guanylate cyclase OS=Xenopus lae                                                         | gc1      |   |  |  |   |   |   |  |      |      |
| Q9W650                | C-met/hepatocyte growth factor rec                                                       | met      |   |  |  |   |   |   |  |      |      |
| Q9W6C5                | Programmed cell death 6-interactin                                                       | pdcd6ip  |   |  |  | Y |   |   |  | TRUE | TRUE |
| Q9W705                | Nuclear receptor coactivator 2 OS=                                                       | ncoa2    |   |  |  | Y |   |   |  | TRUE | TRUE |
| Q9W791                | T-complex protein 1 subunit alpha C                                                      | tcp1     |   |  |  | Y |   |   |  | TRUE | TRUE |
| Q9W7F2;CL2204Contig2  | WD repeat-containing protein 1-A O                                                       | wdr1     | Y |  |  | Y |   |   |  | TRUE | TRUE |
| Q9YGY0                | Axin-1 OS=Xenopus laevis GN=axin                                                         | axin1    |   |  |  | Y |   | Y |  | TRUE | TRUE |

|                            |                                                                                                       |          |  |  |  |   |   |      |      |
|----------------------------|-------------------------------------------------------------------------------------------------------|----------|--|--|--|---|---|------|------|
| Q9ZZM1                     | Cytochrome c oxidase subunit 2 (Fr                                                                    | cox2     |  |  |  |   |   |      |      |
| TC414340 UniRef100_Q6C     | Rep: Kidney mitochondrial carrier p                                                                   | Slc25a30 |  |  |  | Y |   | TRUE | TRUE |
| TC424140 homologue to U    | Rep: Protein DBF4 homolog A - Xer                                                                     | dbf4     |  |  |  |   |   |      |      |
| TC425929 similar to UniRe  | Rep: MGC69138 protein - Xenopus laevis (African clawed frog), partial (32%)                           |          |  |  |  |   |   |      |      |
| TC426340 homologue to U    | Rep: Rpl9-prov protein - Xenopus la                                                                   | rpl9     |  |  |  | Y |   | TRUE | TRUE |
| TC427469 homologue to U    | Rep: MGC81949 protein - Xenopus laevis (African clawed frog), partial (37%)                           |          |  |  |  |   |   |      |      |
| TC427947 similar to UniRe  | Rep: Homolog of Homo sapiens "Sc                                                                      | c21orf33 |  |  |  |   |   |      |      |
| TC428477 homologue to U    | Rep: Methylene tetrahydrofolate red                                                                   | mthfr    |  |  |  | Y |   | TRUE | TRUE |
| TC428798 homologue to U    | Rep: MGC82630 protein - Xenopus laevis (African clawed frog), partial (31%)                           |          |  |  |  |   |   |      |      |
| TC428802 UniRef100_Q5M     | Rep: Brg1 - Xenopus laevis (African                                                                   | brg1     |  |  |  |   | Y | TRUE | TRUE |
| TC429244                   | TC429244                                                                                              |          |  |  |  |   |   |      |      |
| TC429806 homologue to U    | Rep: Gem protein - Xenopus tropica                                                                    | gem      |  |  |  | Y |   | TRUE | TRUE |
| TC429946 homologue to U    | Rep: MGC97820 protein - Xenopus tropicalis (Western clawed frog) (Silurana tropicalis), partial (51%) |          |  |  |  |   |   |      |      |
| TC430486 UniRef100_Q6E     | Rep: Synaptobrevin homolog YKT6                                                                       | ykt6     |  |  |  |   |   |      |      |
| TC430865 similar to UniRe  | Rep: mitochondrial tumor suppress                                                                     | mtus1    |  |  |  | Y |   | TRUE | TRUE |
| TC432016 weakly similar to | Rep: Centrin - Plasmodium yoelii yo                                                                   | ctn      |  |  |  |   |   |      |      |
| TC432167 UniRef100_Q6F     | Rep: Proteasome subunit beta type                                                                     | psmb     |  |  |  |   |   |      |      |
| TC432608 homologue to U    | Rep: Protein OS-9 precursor (Ampli                                                                    | os9      |  |  |  |   |   |      |      |
| TC433738 homologue to U    | Rep: Elongation factor Tu - Xenopus                                                                   | eftu     |  |  |  |   |   |      |      |
| TC435033 homologue to U    | Rep: ATP synthase subunit beta - X                                                                    | atpb     |  |  |  |   |   |      |      |
| TC435583 weakly similar to | Rep: Tripartite motif-containing prot                                                                 | trim68   |  |  |  |   |   |      |      |
| TC435750 homologue to U    | Rep: Nonmuscle myosin II heavy ch                                                                     | myh2     |  |  |  |   |   |      |      |
| TC436371 homologue to U    | Rep: Snail homolog 1 - Xenopus tro                                                                    | snai1    |  |  |  | Y |   | TRUE | TRUE |
| TC439412 UniRef100_Q5F     | Rep: LOC100036774 protein - Xenopus laevis (African clawed frog), partial (52%)                       |          |  |  |  |   |   |      |      |
| TC439428 homologue to U    | Rep: Slc25a3-prov protein - Xenopus                                                                   | slc25a3  |  |  |  | Y |   | TRUE | TRUE |
| TC440065 homologue to U    | Rep: MGC82602 protein - Xenopus laevis (African clawed frog), complete                                |          |  |  |  |   |   |      |      |
| TC440338 UniRef100_Q2E     | Rep: 60S ribosomal protein L27 - X4                                                                   | rpl27    |  |  |  | Y |   | TRUE | TRUE |
| TC440393 similar to UniRe  | Rep: Pla2g4a protein - Xenopus lae                                                                    | pla2g4a  |  |  |  | Y |   | TRUE | TRUE |
| TC441388                   | TC441388                                                                                              |          |  |  |  |   |   |      |      |
| TC441790 homologue to U    | Rep: Fry protein - Xenopus tropicali                                                                  | fry      |  |  |  | Y |   | TRUE | TRUE |
| TC442984 similar to UniRe  | Rep: LOC496332 protein - Xenopus laevis (African clawed frog), partial (40%)                          |          |  |  |  |   |   |      |      |
| TC443713 homologue to U    | Rep: Superoxide dismutase - Xenop                                                                     | sod      |  |  |  |   |   |      |      |
| TC443718 homologue to U    | Rep: Wdr12 protein - Xenopus tropi                                                                    | wdr12    |  |  |  | Y |   | TRUE | TRUE |
| TC443725 homologue to U    | Rep: 60S ribosomal protein L6 - Xer                                                                   | rpl6     |  |  |  |   |   |      |      |
| TC444012 homologue to U    | Rep: DnaJ homolog subfamily C me                                                                      | drip78   |  |  |  |   |   |      |      |
| TC444338 similar to UniRe  | Rep: Iron(III) ABC transporter, ATP-                                                                  | ct0412   |  |  |  |   |   |      |      |
| TC444576 homologue to U    | Rep: Uncharacterized protein C6orf                                                                    | c6orf45  |  |  |  |   |   |      |      |
| TC444688 UniRef100_Q7I     | Rep: Ctsc protein - Xenopus laevis                                                                    | ctsc     |  |  |  |   |   | TRUE | TRUE |
| TC445443 similar to UniRe  | Rep: Conserved fungal protein - Schizosaccharomyces pombe (Fission yeast), partial (5%)               |          |  |  |  |   |   |      |      |
| TC445670 homologue to U    | Rep: Myosin heavy chain - Xenopus                                                                     | mhc      |  |  |  |   |   |      |      |
| TC446929 homologue to U    | Rep: U4/U6 small nuclear ribonucle                                                                    | prp31    |  |  |  |   |   |      |      |
| TC447025 homologue to U    | Rep: L-lactate dehydrogenase B ch                                                                     | ldhb     |  |  |  |   |   |      |      |
| TC447390 weakly similar to | Rep: Neuroblast differentiation-assc                                                                  | ahnak    |  |  |  | Y |   | TRUE | TRUE |
| TC447788 similar to UniRe  | Rep: Hepatic triacylglycerol lipase p                                                                 | lipc     |  |  |  |   |   |      |      |
| TC448187 homologue to U    | Rep: Tripartite motif-containing prot                                                                 | trim44   |  |  |  | Y |   | TRUE | TRUE |
| TC448972 homologue to U    | Rep: Arginine/serine-rich coiled-coil                                                                 | rsrc2    |  |  |  | Y |   | TRUE | TRUE |
| TC449350 similar to UniRe  | Rep: Protein FAM20A precursor. - C                                                                    | fam20a   |  |  |  |   |   |      |      |
| TC449434 homologue to U    | Rep: Zinc finger protein 326 - Xenop                                                                  | znf326   |  |  |  | Y |   | TRUE | TRUE |
| TC449583 homologue to U    | Rep: AT20865p - Drosophila melanogaster (Fruit fly), partial (22%)                                    |          |  |  |  |   |   |      |      |
| TC449759 homologue to U    | Rep: Creatine kinase, brain - Xenop                                                                   | ckb      |  |  |  | Y |   | TRUE | TRUE |
| TC450147 weakly similar to | Rep: ADP-ribosyl cyclase 2 precurs                                                                    | bst1     |  |  |  |   |   |      |      |
| TC451860 homologue to U    | Rep: Proteasome (Prosome macropro                                                                     | psmb4    |  |  |  |   |   | TRUE | TRUE |
| TC453026 UniRef100_P02     | Rep: Histone H2B 1.1 - Xenopus lae                                                                    | histh2b1 |  |  |  |   |   |      |      |
| TC453211 homologue to U    | Rep: LOC100037140 protein - Xenopus laevis (African clawed frog), partial (22%)                       |          |  |  |  |   |   |      |      |
| TC453299 homologue to U    | Rep: Seizure 6-like protein precurs                                                                   | sez6l    |  |  |  | Y |   | TRUE | TRUE |
| TC453514 homologue to U    | Rep: Stk39-prov protein - Xenopus                                                                     | stk39    |  |  |  | Y |   | TRUE | TRUE |
| TC453615 similar to UniRe  | Rep: MGC80407 protein - Xenopus laevis (African clawed frog), partial (15%)                           |          |  |  |  |   |   |      |      |
| TC454736 homologue to U    | Rep: Ppp5c-prov protein. - Xenopus                                                                    | Ppp5c    |  |  |  |   | Y | TRUE | TRUE |
| TC454792 UniRef100_Q0I     | Rep: MGC154791 protein - Xenopus laevis (African clawed frog), partial (90%)                          |          |  |  |  |   |   |      |      |
| TC456286 homologue to U    | Rep: Transmembrane protein 56-A                                                                       | temem56  |  |  |  |   |   |      |      |
| TC456376 homologue to U    | Rep: Ubiquinol-cytochrome c reduct                                                                    | uqcrh11  |  |  |  |   |   |      |      |
| TC457230 similar to UniRe  | Rep: MGC89272 protein. - Xenopus tropicalis, partial (74%)                                            |          |  |  |  |   |   |      |      |
| TC457286 similar to UniRe  | Rep: Vitellogenin-A2 precursor (VT                                                                    | vtga2    |  |  |  | Y | Y | TRUE | TRUE |
| TC457517 UniRef100_UPI     | Rep: Histone deacetylase 9 (HD9) (                                                                    | hdac9    |  |  |  |   | Y | TRUE | TRUE |
| TC457582 similar to UniRe  | Rep: Serum amyloid P-component                                                                        | sap      |  |  |  |   |   |      |      |
| TC458492 UniRef100_Q7Z     | Rep: Acaa2-prov protein - Xenopus                                                                     | acaa2    |  |  |  |   | Y | TRUE | TRUE |
| TC460552 homologue to U    | Rep: Heat shock 10kDa protein 1 -                                                                     | hspe1    |  |  |  | Y |   | TRUE | TRUE |
| TC460601 UniRef100_Q6E     | Rep: MGC81975 protein - Xenopus laevis (African clawed frog), complete                                |          |  |  |  |   |   |      |      |
| TC460762 similar to UniRe  | Rep: LOC100049118 protein - Xenopus laevis (African clawed frog), partial (48%)                       |          |  |  |  |   |   |      |      |
| TC460857 weakly similar to | Rep: Serine/threonine-protein kinas                                                                   | sbk1     |  |  |  |   |   |      |      |
| TC461251 homologue to U    | Rep: Transcription activator, effector binding - Burkholderia ambifaria MC40-6, partial (8%)          |          |  |  |  |   |   |      |      |
| TC461595 homologue to U    | Rep: LOC100049136 protein - Xenopus laevis (African clawed frog), partial (98%)                       |          |  |  |  |   |   |      |      |
| TC462321 similar to UniRe  | Rep: Vitellogenin-A2 precursor (VT                                                                    | vtga2    |  |  |  | Y | Y | TRUE | TRUE |
| TC462743 homologue to U    | Rep: Vitellogenin B1 - Xenopus lae                                                                    | vtgb1    |  |  |  |   |   | TRUE | TRUE |
| TC462923 UniRef100_Q7Z     | Rep: Hnrpk protein - Xenopus laevis                                                                   | hnrpk    |  |  |  |   |   |      |      |
| TC463468                   | vitellogenin (A1) [Xenopus laevis]                                                                    | vtga1    |  |  |  | Y |   | TRUE | TRUE |
| TC463837 homologue to U    | Rep: MGC81523 protein - Xenopus laevis (African clawed frog), partial (98%)                           |          |  |  |  |   |   |      |      |
| TC464539 similar to UniRe  | Rep: Vitellogenin B1 - Xenopus lae                                                                    | vtgb1    |  |  |  |   | Y | TRUE | TRUE |
| TC464574 similar to UniRe  | Rep: Krt8 protein - Xenopus laevis (African clawed frog), partial (30%)                               |          |  |  |  |   |   |      |      |
| TC465314 UniRef100_UPI     | Rep: Whirlin (Autosomal recessive d                                                                   | dfnb31   |  |  |  |   |   |      |      |
| TC465972 similar to UniRe  | Rep: Probable ATP-dependent RNA                                                                       | dhx37    |  |  |  |   | Y | TRUE | TRUE |
| TC466521 homologue to U    | Rep: Basic transcription factor 3 - X                                                                 | btf3     |  |  |  |   |   |      |      |
| TC466740 similar to UniRe  | Rep: Zgc:136388 - Danio rerio (Zebrafish) (Brachydanio rerio), partial (18%)                          |          |  |  |  |   |   |      |      |
| TC467277 homologue to U    | Rep: Calpain - Xenopus laevis (Afric                                                                  | capn     |  |  |  |   |   |      |      |
| TC467283 homologue to U    | Rep: LOC431926 protein - Xenopus laevis (African clawed frog), partial (49%)                          |          |  |  |  |   |   |      |      |
| TC468263 similar to UniRe  | Rep: MGC68737 protein - Xenopus laevis (African clawed frog), partial (28%)                           |          |  |  |  |   |   |      |      |

|                            |                                                                                      |        |   |   |   |  |  |      |      |
|----------------------------|--------------------------------------------------------------------------------------|--------|---|---|---|--|--|------|------|
| TC468342 weakly similar to | Rep: Predicted protein - Nematostella vectensis (Starlet sea anemone), partial (48%) |        |   |   |   |  |  |      |      |
| TC469090 homologue to U    | Rep: Vitellogenin-A2 precursor (VTG)                                                 | vtga2  |   | Y | Y |  |  | TRUE | TRUE |
| TC469714 homologue to U    | Rep: LOC494839 protein - Xenopus laevis (African clawed frog), partial (25%)         |        |   |   |   |  |  |      |      |
| W6E858                     | Maternal effect lethal-28 OS=Xenopus laevis                                          | mel28  |   |   |   |  |  |      |      |
| W8W3R8                     | Arid5B short isoform (Fragment) OS=Xenopus laevis                                    | arid5b |   |   | Y |  |  | TRUE | TRUE |
| zeinaSSns_comp169402_c     | len=231                                                                              |        |   |   |   |  |  |      |      |
| zeinaSSns_comp30958_c      | len=202                                                                              |        |   |   |   |  |  |      |      |
| zeinaSSns_comp338451_c     | len=210                                                                              |        |   |   |   |  |  |      |      |
| zeinaSSns_comp339972_c     | len=245                                                                              |        |   |   |   |  |  |      |      |
| zeinaSSns_comp352393_c     | len=531                                                                              |        |   |   |   |  |  |      |      |
| zeinaSSns_comp352424_c     | len=472                                                                              |        |   |   |   |  |  |      |      |
| zeinaSSns_comp360359_c     | len=3271                                                                             |        |   |   |   |  |  |      |      |
| zeinaSSns_comp375014_c     | len=695                                                                              |        |   |   |   |  |  |      |      |
| zeinaSSns_comp375133_c     | len=290                                                                              |        |   |   |   |  |  |      |      |
| zeinaSSns_comp377268_c     | len=241                                                                              |        |   |   |   |  |  |      |      |
| zeinaSSns_comp377647_c     | len=449                                                                              |        |   |   |   |  |  |      |      |
| zeinaSSns_comp378203_c     | len=201                                                                              |        |   |   |   |  |  |      |      |
| zeinaSSns_comp381133_c     | len=1342                                                                             |        |   |   |   |  |  |      |      |
| zeinaSSns_comp381925_c     | len=669                                                                              |        |   |   |   |  |  |      |      |
| zeinaSSns_comp382047_c     | len=854                                                                              |        |   |   |   |  |  |      |      |
| zeinaSSns_comp382686_c     | len=1587                                                                             |        |   |   |   |  |  |      |      |
| zeinaSSns_comp382744_c     | len=1626                                                                             |        |   |   |   |  |  |      |      |
| zeinaSSns_comp382833_c     | len=2746                                                                             |        |   |   |   |  |  |      |      |
| zeinaSSns_comp383021_c     | len=1221                                                                             |        |   |   |   |  |  |      |      |
| zeinaSSns_comp383101_c     | len=1454                                                                             |        |   |   |   |  |  |      |      |
| zeinaSSns_comp383886_c     | len=1598                                                                             |        | Y |   |   |  |  | TRUE | TRUE |
| zeinaSSns_comp384061_c     | len=4918                                                                             |        |   |   |   |  |  |      |      |
| zeinaSSns_comp385518_c     | len=534                                                                              |        |   |   |   |  |  |      |      |
| zeinaSSns_comp385894_c     | len=4516                                                                             |        |   |   |   |  |  |      |      |
| zeinaSSns_comp386267_c     | len=6035                                                                             |        |   |   |   |  |  |      |      |
| zeinaSSns_comp386428_c     | len=2428                                                                             |        |   |   |   |  |  |      |      |
| zeinaSSns_comp386578_c     | len=1273                                                                             |        |   |   |   |  |  |      |      |
| zeinaSSns_comp386803_c     | len=4262                                                                             |        |   |   |   |  |  |      |      |
| zeinaSSns_comp386979_c     | len=2448                                                                             |        |   |   |   |  |  |      |      |
| zeinaSSns_comp387272_c     | len=1781                                                                             |        | Y |   |   |  |  | TRUE | TRUE |
| zeinaSSns_comp387330_c     | len=1937                                                                             |        |   |   |   |  |  |      |      |
| zeinaSSns_comp387346_c     | len=1947                                                                             |        |   |   |   |  |  |      |      |
| zeinaSSns_comp387412_c     | len=1966                                                                             |        |   |   |   |  |  |      |      |
| zeinaSSns_comp387425_c     | len=3248                                                                             |        |   |   |   |  |  |      |      |
| zeinaSSns_comp387445_c     | len=401                                                                              |        |   |   |   |  |  |      |      |
| zeinaSSns_comp387680_c     | len=567                                                                              |        |   |   |   |  |  |      |      |
| zeinaSSns_comp388100_c     | len=1955                                                                             |        |   |   |   |  |  |      |      |
| zeinaSSns_comp388330_c     | len=1496                                                                             |        |   |   |   |  |  |      |      |
| zeinaSSns_comp388513_c     | len=2561                                                                             |        |   |   |   |  |  |      |      |
| zeinaSSns_comp388546_c     | len=691                                                                              |        |   |   |   |  |  |      |      |
| zeinaSSns_comp388555_c     | len=567                                                                              |        |   |   |   |  |  |      |      |
| zeinaSSns_comp388587_c     | len=2100                                                                             |        |   |   |   |  |  |      |      |
| zeinaSSns_comp388666_c     | len=2890                                                                             |        |   |   |   |  |  |      |      |
| zeinaSSns_comp388699_c     | len=2647                                                                             |        |   |   |   |  |  |      |      |
| zeinaSSns_comp388845_c     | len=3172                                                                             |        |   |   |   |  |  |      |      |
| zeinaSSns_comp388890_c     | len=1570                                                                             |        |   |   |   |  |  |      |      |
| zeinaSSns_comp388960_c     | len=2747                                                                             |        |   |   |   |  |  |      |      |
| zeinaSSns_comp389160_c     | len=2130                                                                             |        |   |   |   |  |  |      |      |
| zeinaSSns_comp389334_c     | len=1094                                                                             |        |   |   |   |  |  |      |      |
| zeinaSSns_comp389457_c     | len=2398                                                                             |        |   |   |   |  |  |      |      |
| zeinaSSns_comp389497_c     | len=5283                                                                             |        |   |   |   |  |  |      |      |
| zeinaSSns_comp389539_c     | len=5153                                                                             |        |   |   |   |  |  |      |      |
| zeinaSSns_comp389585_c     | len=3397                                                                             |        |   |   |   |  |  |      |      |
| zeinaSSns_comp389640_c     | len=4092                                                                             |        |   |   |   |  |  |      |      |
